# Supplementary material
Source: HighWire-hosted journal article supplement (doi:10.1101/rna.043729.113)
Supplement: Supp_Tables.xlsx [file Supp_Tables.xlsx]

## Sheet: Table S1
Table S1. The list of 88 CB proteins identified in at least three separate experiments.
UNIRPOT ID	Recommended protein name	Protein short names	Gene Symbol	Gene Name
ADAD1_MOUSE	Adenosine deaminase domain-containing protein 1	ADAD1; TENR	Adad1; Tenr	adenosine deaminase domain containing 1 (testis specific); similar to Tenr protein
ADAD2_MOUSE	Adenosine deaminase domain-containing protein 2	ADAD2	Adad2	adenosine deaminase domain containing 2
AKAP4_MOUSE	A-kinase anchor protein 4	AKAP4; AKAP82; FSC1; PRKA4; p82	Akap4	A kinase (PRKA) anchor protein 4
ASZ1_MOUSE	Ankyrin repeat, SAM and basic leucine zipper domain-containing protein 1	ASZ1; GASZ	Asz1 ; Gasz	ankyrin repeat, SAM and basic leucine zipper domain containing 1
CASC3_MOUSE	Protein CASC3	CASC3; MLN51 homolog; BTZ	Casc3; Mln51	cancer susceptibility candidate 3
CENPV_MOUSE	Centromere protein V	CENP-V; PRR6	Cenpv; Prr6	centromere protein V
CN166_MOUSE	UPF0568 protein C14orf166 homolog		2700060E02Rik; Gm10704	RIKEN cDNA 2700060E02 gene; predicted gene 10704
CNBP_MOUSE	Cellular nucleic acid-binding protein	CNBP; XNF9	Cnbp; Znf9	cellular nucleic acid binding protein
DDX1_MOUSE	ATP-dependent RNA helicase DDX1	DDX1	Ddx1	DEAD (Asp-Glu-Ala-Asp) box polypeptide 1
DDX25_MOUSE	ATP-dependent RNA helicase DDX25	DDX25; GRTH	Ddx25; Grth	DEAD (Asp-Glu-Ala-Asp) box polypeptide 25
DDX3L_MOUSE	Putative ATP-dependent RNA helicase Pl10	DDX3L; D1PAS1	D1Pas1; Pl10	DNA segment, Chr 1, Pasteur Institute 1
DDX4_MOUSE	Probable ATP-dependent RNA helicase DDX4	DDX4; MVH	Ddx4; Vasa	DEAD (Asp-Glu-Ala-Asp) box polypeptide 4
DDX5_MOUSE	Probable ATP-dependent RNA helicase DDX5	DDX5; mDEAD1; RNA helicase p68	Ddx5; Tnz2	DEAD (Asp-Glu-Ala-Asp) box polypeptide 5; predicted gene 12183
DHX9_MOUSE	ATP-dependent RNA helicase A	DHX9; RHA; mHEL-5; NDH II	Dhx9; Ddx9	DEAH (Asp-Glu-Ala-His) box polypeptide 9
EDC4_MOUSE	Enhancer of mRNA-decapping protein 4	EDC4	Edc4	enhancer of mRNA decapping 4
EF1A1_MOUSE	Elongation factor 1-alpha 1	EF-1-alpha1; EF-Tu; eEF1A-1	Eef1a1	predicted gene 5869; predicted gene 7161; predicted gene 7105; predicted gene 5822; similar to eukaryotic translation elongation factor 1 alpha 1; predicted gene 6192; predicted gene 6392; predicted gene 6767; predicted gene 6170; predicted gene 6548; predicted gene 6789; eukaryotic translation elongation factor 1 alpha 1
ELAV1_MOUSE	ELAV-like protein 1	ELAV1; HuR	Elav1; Elra, Hua	ELAV (embryonic lethal, abnormal vision, Drosophila)-like 1 (Hu antigen R)
EST1A_MOUSE	Telomerase-binding protein EST1A	EST1A; SMG6	Smg6; Est1a, Kiaa0732	Smg-6 homolog, nonsense mediated mRNA decay factor (C. elegans)
EWS_MOUSE	RNA-binding protein EWS	EWS	Ewsr1, Ews, Ewsh	predicted gene 6627; Ewing sarcoma breakpoint region 1
FABP9_MOUSE	Fatty acid-binding protein 9	FABP9; PERF15; TLBP	Fabp9; Perf15, Tlbp	fatty acid binding protein 9, testis
FYCO1_MOUSE	FYVE and coiled-coil domain-containing protein 1	FYCO1	Fyco1	FYVE and coiled-coil domain containing 1
H2A1F_MOUSE	Histone H2A type 1-F	H2A1F	Hist1h2af	histone cluster 1, H2af
H31_MOUSE	Histone H3.1	H3.1	Hist1h3a; Hist1h3g; Hist1h3i; Hist1h3h	histone cluster 1, H3i; histone cluster 1, H3h; histone cluster 1, H3g; predicted gene 12260; histone cluster 1, H3a
HNRDL_MOUSE	Heterogeneous nuclear ribonucleoprotein D-like	hnRNP DL	Hnrpdl; Jktbp	heterogeneous nuclear ribonucleoprotein D-like
HNRH1_MOUSE	Heterogeneous nuclear ribonucleoprotein H	hnRNP H	Hnrnph1	heterogeneous nuclear ribonucleoprotein H1
HNRPF_MOUSE	Heterogeneous nuclear ribonucleoprotein F	hnRNP F	Hnrnpf	predicted gene 5242; predicted gene 7803; predicted gene 7446; predicted gene 11793; heterogeneous nuclear ribonucleoprotein F
HNRPM_MOUSE	Heterogeneous nuclear ribonucleoprotein M	hnRNP M	Hnrnpm	heterogeneous nuclear ribonucleoprotein M
HNRPU_MOUSE	Heterogeneous nuclear ribonucleoprotein U	hnRNP U; SAF-A	Hnrnpu	heterogeneous nuclear ribonucleoprotein U
HS90A_MOUSE	Heat shock protein HSP 90-alpha	HSP90-alpha; HSP86; TSTA	Hsp90aa1, Hsp86, Hsp86-1, Hspca	predicted gene 5511; heat shock protein 90, alpha (cytosolic), class A member 1
HS90B_MOUSE	Heat shock protein HSP 90-beta	HSP90-beta; HSP84; TSTA	Hsp90ab1, Hsp84, Hsp84-1, Hspcb	heat shock protein 90 alpha (cytosolic), class B member 1
HSP72_MOUSE	Heat shock-related 70 kDa protein 2	HSP70.2; HSPA2	Hspa2, Hcp70.2, Hsp70-2	heat shock protein 2
IF2B3_MOUSE	Insulin-like growth factor 2 mRNA-binding protein 3	IGF2 mRNA-binding protein 3; IMP-3,	Igf2bp3; Vickz3	insulin-like growth factor 2 mRNA binding protein 3
IF4A1_MOUSE	Eukaryotic initiation factor 4A-I	eIF4A-I	Eif4a1; Ddx2; Eif4a	eukaryotic translation initiation factor 4A1
IF4A3_MOUSE	Eukaryotic initiation factor 4A-III	eiF4A-III; DDX48	Eif4a3; Ddx48	predicted gene 8994; predicted gene 5580; similar to Probable ATP-dependent helicase DDX48 (DEAD-box protein 48) (Eukaryotic initiation factor 4A-like NUK-34) (Nuclear matrix protein 265) (hNMP 265) (Eukaryotic translation initiation factor 4A isoform 3); eukaryotic translation initiation factor 4A, isoform 3; predicted gene 5576
IF4E_MOUSE	Eukaryotic translation initiation factor 4E	eIF4E	Eif4e	hypothetical LOC630527; eukaryotic translation initiation factor 4E; similar to eukaryotic translation initiation factor 4E
ILF3_MOUSE	Interleukin enhancer-binding factor 3	ILF3	Ilf3	interleukin enhancer binding factor 3
KHDR1_MOUSE	KH domain-containing, RNA-binding, signal transduction-associated protein 1	KHDR1; SAM68	Khdrbs1	KH domain containing, RNA binding, signal transduction associated 1
LDHC_MOUSE	L-lactate dehydrogenase C chain	LDH-C	Ldhc; Ldh3	lactate dehydrogenase C
LYAR_MOUSE	Cell growth-regulating nucleolar protein	LYAR; MLZ-264	Lyar	Ly1 antibody reactive clone
MAEL_MOUSE	Protein maelstrom homolog	MAEL	Mael	maelstrom homolog (Drosophila)
MGNR_MOUSE	Protein mago nashi homolog 2	MGN2; MAGOH	Magohb; Magoh-rs1	mago-nashi homolog B (Drosophila); mago-nashi homolog, proliferation-associated (Drosophila), related sequence 1
NEDD1_MOUSE	Protein NEDD1	NEDD1	Nedd1	neural precursor cell expressed, developmentally down-regulated gene 1
NUCL_MOUSE	Nucleolin	NUCL; Protein C23	Ncl	nucleolin
ODFP1_MOUSE	Outer dense fiber protein 1	ODF1	Odf1; Odfp	outer dense fiber of sperm tails 1
PABP1_MOUSE	Polyadenylate-binding protein 1	PABP-1	Pabpc1; Pabp1	poly(A) binding protein, cytoplasmic 1
PCBP1_MOUSE	Poly(rC)-binding protein 1	PCBP1; hnRNP E1	Pcbp1	poly(rC) binding protein 1
PCBP2_MOUSE	Poly(rC)-binding protein 2	PCBP2; CBP; hnRNP X	Pcbp2; Cbp, Hnrnpx, Hnrpx	poly(rC) binding protein 2
PIWL1_MOUSE	Piwi-like protein 1	PIWIL1; MIWI	Piwil1, Miwi	piwi-like homolog 1 (Drosophila)
PIWL2_MOUSE	Piwi-like protein 2	PIWIL2; MILI	piwil2; Mili	piwi-like homolog 2 (Drosophila)
PSIP1_MOUSE	PC4 and SFRS1-interacting protein	PSIP1; mLEDGF	Psip1; Ledgf	PC4 and SFRS1 interacting protein 1
RAN_MOUSE	GTP-binding nuclear protein Ran	RAN	Ran; Rasl2-8	RAS-like, family 2, locus 9; RAN, member RAS oncogene family; similar to RAN, member RAS oncogene family
RBM14_MOUSE	RNA-binding protein 14	RBM14	Rbm14	RNA binding motif protein 14
RBM8A_MOUSE	RNA-binding protein 8A	RBM8A	Rbm8a; Rbm8	RNA binding motif protein 8a; RIKEN cDNA B020018G12 gene
RENT1_MOUSE	Regulator of nonsense transcripts 1	RENT1; NORF1; UPF1	Upf1; Rent1	UPF1 regulator of nonsense transcripts homolog (yeast)
RL11_MOUSE	60S ribosomal protein L11	RPL11	Rpl11	predicted gene 10288; predicted gene 7589; ribosomal protein L11; predicted gene 10036; predicted gene 7384; predicted gene 6745; predicted gene 5093
RL23A_MOUSE	60S ribosomal protein L23a	RPL23A	Rpl23a	predicted gene 3174; predicted gene 8112; predicted gene 8158; ribosomal protein L23a; predicted gene 5384; predicted gene 8264; predicted gene 6233; similar to 60S ribosomal protein L23a; predicted gene 7413; predicted gene 5351; predicted gene 6177; similar to ribosomal protein L23a; predicted gene 7065; predicted gene 7755; predicted gene 10335; predicted gene 8137; predicted gene 3362; predic…
RL24_MOUSE	60S ribosomal protein L24	RPL24	Rpl24	ribosomal protein L24; predicted gene 9385; predicted gene 7380
RNF17_MOUSE	RING finger protein 17	RNF17; MMIP-2	Rnf17	ring finger protein 17
ROA2_MOUSE	Heterogeneous nuclear ribonucleoproteins A2/B1	hnRNP A2/B1	Hnrnpa2b1	predicted gene 5778; similar to heterogeneous nuclear ribonucleoprotein A2/B1; heterogeneous nuclear ribonucleoprotein A2/B1
ROA3_MOUSE	Heterogeneous nuclear ribonucleoprotein A3	hnRNP A3	Hnrnpa3	predicted gene 7498; hypothetical protein LOC635773; predicted gene 9242; predicted gene 6793; predicted gene 14730; predicted gene 7551; predicted gene 14398; predicted gene 6528; predicted gene 6641; hypothetical protein LOC630507; predicted gene 5550; predicted gene 11847; predicted gene 6506; predicted gene 6153; predicted gene 5469; predicted gene 8991; similar to heterogeneous nuclear ribon…
RS14_MOUSE	40S ribosomal protein S14	RSP14	Rps14	predicted gene 6204; ribosomal protein S14
RS8_MOUSE	40S ribosomal protein S8	RSP8	Rps8	predicted gene 5687; predicted gene 6983; predicted gene 6998; predicted gene 14438; predicted gene 8643; predicted gene 14414; predicted gene 7453; similar to ribosomal protein S8; predicted gene 7246; predicted gene 15501; ribosomal protein S8 pseudogene; ribosomal protein S8; predicted gene 14323; predicted gene 14289; predicted gene 7565; similar to Ubiquitin-conjugating enzyme E2 L3 (Ubiquit…
SMG1_MOUSE	Serine/threonine-protein kinase SMG1	SMG1	Smg1; Kiaa0421	SMG1 homolog, phosphatidylinositol 3-kinase-related kinase (C. elegans)
SPERT_MOUSE	Spermatid-associated protein	SPERT; NURIT	Spert; Nurit	spermatid associated
SRSF1_MOUSE	Serine/arginine-rich splicing factor 1	SRSF1	Srsf1	Serine/arginine-rich splicing factor 1
SRSF3_MOUSE	Serine/arginine-rich splicing factor 3	SRSF3; SRP20; X16	Srsf3; Sfrs3; Srp20; X16	Serine/arginine-rich splicing factor 3
STK31_MOUSE	Serine/threonine-protein kinase 31	STK31	Stk31	serine threonine kinase 31
STP2_MOUSE	Nuclear transition protein 2	TP2	Tnp2	transition protein 2
TBA3_MOUSE	Tubulin alpha-3 chain	TBA3	Tuba3a; Tuba3b	predicted gene 5366; tubulin, alpha 3B; tubulin, alpha 3A
TBB2C_MOUSE	Tubulin beta-4B chain	TBB4B	Tubb4b; Tubb2c	tubulin, beta 2c, psuedogene 1; tubulin, beta 2C; tubulin, beta 2c, pseudogene 2
TDRD1_MOUSE	Tudor domain-containing protein 1	TDRD1	Tdrd1	tudor domain containing 1
TDRD3_MOUSE	Tudor domain-containing protein 3	TDRD3	Tdrd3	similar to Tudor domain containing 3; tudor domain containing 3
TDRD5_MOUSE	Tudor domain-containing protein 5	TDRD5	Tdrd5	tudor domain containing 5
TDRD6_MOUSE	Tudor domain-containing protein 6	TDRD6	Tdrd6	tudor domain containing 6
TDRD7_MOUSE	Tudor domain-containing protein 7	TDRD7; TRAP	Tdrd7; Pctaire2bp	tudor domain containing 7
TDRD9_MOUSE	Putative ATP-dependent RNA helicase TDRD9	TDRD9	Tdrd9	tudor domain containing 9
TEKT2_MOUSE	Tektin-2	TEKT2	Tekt2	tektin 2
TEKT4_MOUSE	Tektin-4	TEKT4	Tekt4	tektin 4
TNPO1_MOUSE	Transportin-1	TNPO1	Tnpo1; Kpnb2	predicted gene 6493; transportin 1
TOM34_MOUSE	Mitochondrial import receptor subunit TOM34	TOM34	Tomm34	translocase of outer mitochondrial membrane 34
TOP3B_MOUSE	DNA topoisomerase 3-beta-1	TOP3B	Top3b	topoisomerase (DNA) III beta
TRA2B_MOUSE	Transformer-2 protein homolog beta	TRA2-beta; SIG41; SFRS10	Tra2b; Sfrs10, Silg41	transformer 2 beta homolog (Drosophila); predicted gene 6439
TT21B_MOUSE	Tetratricopeptide repeat protein 21B	TPR repeat proteiin 21B	Ttc21b; Kiaa1992; Thm1	tetratricopeptide repeat domain 21B
USP9X_MOUSE	Probable ubiquitin carboxyl-terminal hydrolase FAF-X	USP9X; FAF-X; FAM	Usp9x; Fafl; Fam	ubiquitin specific peptidase 9, X chromosome
VP26A_MOUSE	Vacuolar protein sorting-associated protein 26A	VPS26A; H beta 58	Vps26a	vacuolar protein sorting 26 homolog A (yeast)
VPS35_MOUSE	Vacuolar protein sorting-associated protein 35	VPS35	Vps35; Mem3	vacuolar protein sorting 35
YBOX2_MOUSE	Y-box-binding protein 2	YBX2; MSY2	Ybx2; Msy2	similar to Y box protein 2; Y box protein 2
YTDC2_MOUSE	Probable ATP-dependent RNA helicase YTHDC2	YTHDC2	Ythdc2	YTH domain containing 2

## Sheet: Table S2
Table S2. Mapping of the sequenced reads to the mouse genome (2007 NCBI37/mm9).
Sample	total raw reads	After clipping SE adapter	After clipping PE adapter 1	After clipping PE Adapter 2	Percent of input Sequences that remain	Successfully mapped	Percent of Clipped sequences that mapped	Uniquely mapped	Percent of mapped sequences that mapped uniquely
Lysate	11747129	11440470	10583155	10397508	0.885111	8240697	0.792565	6893887	0.836566
Supernatant	15456860	15021259	14189795	13962309	0.903308	11261951	0.806597	9724543	0.863487
Pellet 1	10898703	10668383	7504584	7021606	0.644261	5439706	0.77471	4473048	0.822296
Pellet 2	13742898	13476270	9137162	8357183	0.608109	6298499	0.753663	5245556	0.832826
Round Spermatid 1	5461721	5357803	4708511	4606300	0.843379	3675420	0.797912	2851394	0.775801
Round Spermatid 2 > 500bp	9226600	9062184	8190960	8035315	0.870886	6544852	0.814511	4949725	0.756278
MVH-IP	11934013	11729344	6900388	6028694	0.505169	4062863	0.673921	3377079	0.831207
MVH-IP	9603433	9461031	3971950	3107083	0.323539	1833007	0.589945	1499126	0.817851
MVH-IP	5124860	5027390	2834065	2338315	0.456269	1496913	0.640167	1251749	0.83622
ACR-IP	11411090	11295586	4302528	2111469	0.185037	525082	0.248681	207038	0.394297
ACR-IP	6668381	6605183	2155365	1280847	0.192078	386424	0.301694	214585	0.55531
ACR-IP	9022797	8942481	2527329	1506728	0.166991	507318	0.336702	321434	0.633595
* Reads were discarded if less than 15 nt remained after clipping adapters
** Sequences clipped if > 8 nt of adapter sequence matched the 3' end
*** Reads were allowed to map up to 20 times in the genome

## Sheet: Table S3
Table S3. piRNA cluster transcripts enriched in the CB vs. round spermatids.
loci	type	normalized reads MVH IP	normalized reads RS	Log2(fold change)
chr18:67231293-67233351	piRNA_cluster_195	57.4495	0.195285	8.20057
chr18:67228191-67230895	piRNA_cluster_194	45.3045	0.195227	7.85836
chr10:75312745-75314425	piRNA_cluster_106	33.6708	0.161318	7.70544
chr15:74485331-74488495	piRNA_cluster_166	30.3685	0.147451	7.68619
chr10:86032807-86037534	piRNA_cluster_118	49.187	0.248859	7.62681
chr2:92398782-92438556	piRNA_cluster_9	98.1218	0.518888	7.56301
chr6:87912318-87913336	piRNA_cluster_51	61.2587	0.346698	7.46509
chr11:103303391-103304961	piRNA_cluster_125	27.4457	0.163175	7.39402
chr10:62119245-62188876	piRNA_cluster_102	44.4782	0.26613	7.38482
chr9:54013743-54115917	piRNA_cluster_96	93.9444	0.581884	7.33493
chr2:150971251-150972811	piRNA_cluster_11	332.775	2.14473	7.27761
chr11:103307399-103309043	piRNA_cluster_127	37.1888	0.258771	7.16705
chr7:77039697-77043187	piRNA_cluster_73	19.9543	0.141962	7.13505
chr7:77027888-77034355	piRNA_cluster_70	30.3387	0.225636	7.07102
chr10:75299952-75303740	piRNA_cluster_104	101.719	0.764247	7.05634
chr5:115293344-115299965	piRNA_cluster_38	91.6562	0.708792	7.01473
chr10:75314590-75321813	piRNA_cluster_107	81.467	0.631132	7.01213
chr4:93756266-94092279	piRNA_cluster_22	46.6264	0.363349	7.00365
chr7:80249622-80270552	piRNA_cluster_65	123.659	0.966181	6.99986
chr1:127071500-127073713	piRNA_cluster_2	76.4025	0.604538	6.98164
chr2:92324082-92398388	piRNA_cluster_8	108.101	0.858748	6.97593
chr15:74436458-74478572	piRNA_cluster_165	95.0731	0.755265	6.97591
chr1:57408302-57412593	piRNA_cluster_5	46.6636	0.379617	6.94161
chr4:123510653-123536756	piRNA_cluster_24	47.9395	0.401402	6.90002
chr15:78485416-78496802	piRNA_cluster_170	48.5947	0.413678	6.87615
chr12:99648709-99666299	piRNA_cluster_138	66.8955	0.573953	6.86483
chr12:99624337-99627910	piRNA_cluster_136	70.6653	0.616975	6.83965
chr15:59080301-59111507	piRNA_cluster_161	40.779	0.356591	6.83741
chr11:103293543-103302953	piRNA_cluster_124	59.2004	0.524211	6.81932
chr6:87930415-87995264	piRNA_cluster_55	61.8577	0.550983	6.8108
chr10:86038119-86039479	piRNA_cluster_119	99.0618	0.908171	6.76922
chr7:80276993-80291138	piRNA_cluster_66	42.6311	0.393638	6.75889
chr17:66570762-66574017	piRNA_cluster_182	13.1646	0.121894	6.75489
chr11:107794700-108275710	piRNA_cluster_128	98.4519	0.918502	6.74399
chr10:86083586-86085490	piRNA_cluster_111	63.3123	0.603231	6.71363
chr12:99648709-99666299	piRNA_cluster_133	78.0954	0.753821	6.69487
chr9:67600765-67605947	piRNA_cluster_93	44.6684	0.433076	6.68849
chr14:20467626-20470572	piRNA_cluster_152	58.5558	0.574373	6.67168
chr10:85224932-85230028	piRNA_cluster_109	88.1647	0.870656	6.66195
chr7:80929416-80970875	piRNA_cluster_77	65.883	0.654204	6.65402
chr10:62119245-62188876	piRNA_cluster_100	29.9259	0.299348	6.64343
chr7:77045278-77062687	piRNA_cluster_61	67.963	0.694528	6.61257
chr7:80924692-80928984	piRNA_cluster_76	27.0211	0.276626	6.61
chr6:127733349-127769287	piRNA_cluster_45	80.123	0.8247	6.6022
chr9:67558109-67577571	piRNA_cluster_98	103.149	1.07228	6.58789
chr17:27491408-27497109	piRNA_cluster_175	62.0244	0.646093	6.58495
chr15:59080301-59111507	piRNA_cluster_167	64.4611	0.68022	6.56628
chr1:93299654-93301513	piRNA_cluster_6	144.504	1.53393	6.55773
chr17:66567665-66569866	piRNA_cluster_181	13.1942	0.141529	6.54267
chr4:93756266-94092279	piRNA_cluster_23	63.0328	0.682583	6.52895
chr8:119730513-119734189	piRNA_cluster_82	28.0225	0.307603	6.50938
chr7:77063462-77068998	piRNA_cluster_62	40.8348	0.450074	6.50349
chr9:67540380-67557707	piRNA_cluster_97	70.4618	0.784569	6.4888
chr9:67578034-67591728	piRNA_cluster_99	69.6557	0.779358	6.48181
chr10:62119245-62188876	piRNA_cluster_103	49.3975	0.553967	6.47849
chr12:99672203-99816150	piRNA_cluster_134	36.731	0.412121	6.47778
chr9:67578034-67591728	piRNA_cluster_91	81.1473	0.913116	6.4736
chr6:85936800-85939631	piRNA_cluster_50	95.3874	1.0775	6.46803
chr10:86080814-86083391	piRNA_cluster_110	54.105	0.614997	6.45904
chr7:77045278-77062687	piRNA_cluster_74	55.0346	0.645696	6.41334
chr1:94888558-94893355	piRNA_cluster_7	112.231	1.32704	6.40212
chr18:67190699-67226003	piRNA_cluster_196	118.353	1.44138	6.3595
chr5:115288784-115290171	piRNA_cluster_36	20.9867	0.257153	6.3507
chr10:66154549-66160498	piRNA_cluster_117	59.9079	0.738936	6.34115
chr13:52217523-52218825	piRNA_cluster_140	71.8767	0.893075	6.3306
chr7:80929416-80970875	piRNA_cluster_68	90.6638	1.14987	6.30098
chr7:77073584-77080369	piRNA_cluster_64	23.574	0.30369	6.27845
chr5:113749080-113768789	piRNA_cluster_35	54.7645	0.707485	6.2744
chr6:127774854-127787180	piRNA_cluster_46	54.5409	0.705229	6.2731
chr10:66149535-66150874	piRNA_cluster_116	31.9294	0.422668	6.23922
chr14:24900866-24916087	piRNA_cluster_146	58.3937	0.777406	6.231
chr17:66575860-66577952	piRNA_cluster_184	30.7557	0.4126	6.21997
chr3:20357321-20358487	piRNA_cluster_14	25.0074	0.337136	6.21288
chr4:93756266-94092279	piRNA_cluster_21	57.3969	0.776698	6.20748
chr9:67592953-67599612	piRNA_cluster_92	41.3486	0.563481	6.19733
chr8:95934569-95936028	piRNA_cluster_85	42.478	0.592083	6.16477
chr10:75322097-75324410	piRNA_cluster_108	66.5661	0.955096	6.123
chr12:99628684-99647789	piRNA_cluster_137	84.6431	1.22317	6.11269
chr5:150601995-150629164	piRNA_cluster_41	61.0641	0.887362	6.10466
chr7:132471398-132493286	piRNA_cluster_78	36.2217	0.531816	6.08978
chr8:94713346-94717740	piRNA_cluster_79	232.891	3.44855	6.07752
chr2:150973430-150974559	piRNA_cluster_12	182.303	2.71729	6.06802
chr2:127526856-127528345	piRNA_cluster_10	38.1439	0.571599	6.06031
chr5:113774332-113784249	piRNA_cluster_28	80.565	1.22262	6.04211
chr6:81843885-81850528	piRNA_cluster_48	153.679	2.38403	6.01037
chr7:80980337-80982642	piRNA_cluster_69	41.9979	0.660005	5.9917
chr5:113768815-113771212	piRNA_cluster_27	129.721	2.07272	5.96774
chr6:128388774-128425635	piRNA_cluster_47	42.8847	0.685693	5.96676
chr17:27430631-27442970	piRNA_cluster_186	32.4466	0.525907	5.94711
chr17:66555580-66557319	piRNA_cluster_178	48.6781	0.791829	5.94194
chr17:27443053-27458448	piRNA_cluster_187	71.1186	1.18156	5.91146
chr14:45392438-45394206	piRNA_cluster_158	20.9582	0.364563	5.8452
chr11:100320792-100322105	piRNA_cluster_131	72.1799	1.29517	5.80038
chr6:85060730-85076119	piRNA_cluster_49	33.4873	0.601047	5.79999
chr14:20457395-20466006	piRNA_cluster_151	91.6708	1.64722	5.79836
chr7:30920591-30923956	piRNA_cluster_59	64.9691	1.18584	5.77578
chr6:128119344-128121342	piRNA_cluster_57	110.786	2.03712	5.76509
chr17:66548405-66550177	piRNA_cluster_192	32.7418	0.602175	5.76481
chr4:61880837-61882234	piRNA_cluster_20	55.249	1.03517	5.738
chr5:113786109-113787245	piRNA_cluster_29	25.5254	0.479122	5.7354
chr19:37329571-37335141	piRNA_cluster_197	63.0247	1.21309	5.69916
chr13:51003001-51006587	piRNA_cluster_145	159.967	3.08051	5.69846
chr14:45396943-45399437	piRNA_cluster_160	75.2551	1.45259	5.69509
chr10:75310070-75312230	piRNA_cluster_105	44.9733	0.88261	5.67115
chr3:34771542-34776260	piRNA_cluster_13	61.3926	1.2098	5.66522
chr14:25184138-25188648	piRNA_cluster_156	54.4122	1.08183	5.65239
chr8:112645722-112650007	piRNA_cluster_80	101.218	2.01991	5.64703
chr17:27497164-27499405	piRNA_cluster_176	20.4264	0.409507	5.64041
chr5:150592167-150601676	piRNA_cluster_40	14.5029	0.294139	5.6237
chr6:127733349-127769287	piRNA_cluster_56	116.797	2.3792	5.61738
chr7:80246010-80249470	piRNA_cluster_75	80.5648	1.67089	5.59146
chr14:24920450-24937627	piRNA_cluster_147	33.1172	0.70597	5.55183
chr18:67226122-67227616	piRNA_cluster_193	36.7687	0.798635	5.5248
chr10:18538518-18540888	piRNA_cluster_114	30.5054	0.692129	5.46188
chr14:25165861-25169323	piRNA_cluster_153	30.4924	0.693771	5.45785
chr13:50608495-50610207	piRNA_cluster_143	152.326	3.54535	5.42509
chr5:115290620-115291912	piRNA_cluster_37	20.5453	0.490211	5.38926
chr17:66558481-66565233	piRNA_cluster_179	56.289	1.34547	5.38667
chr14:25175764-25177323	piRNA_cluster_154	14.9734	0.395713	5.2418
chr15:59115551-59119463	piRNA_cluster_162	14.9568	0.400262	5.22372
chr17:27461805-27487122	piRNA_cluster_174	45.9268	1.24674	5.2031
chr4:123568933-123570325	piRNA_cluster_25	20.9376	0.572331	5.19311
chr10:18516446-18522815	piRNA_cluster_113	62.6038	1.71186	5.19262
chr15:83184124-83197707	piRNA_cluster_171	53.3521	1.45977	5.19174
chr8:112650291-112654127	piRNA_cluster_81	59.6137	1.63605	5.18735
chr13:50610526-50611926	piRNA_cluster_144	161.309	4.45594	5.17796
chr14:45470909-45626575	piRNA_cluster_149	65.1309	1.8078	5.17104
chr9:54013743-54115917	piRNA_cluster_89	42.1991	1.18232	5.15752
chr4:57369431-57377164	piRNA_cluster_19	155.287	4.39073	5.14433
chr17:66538656-66547877	piRNA_cluster_191	34.7879	1.00391	5.11488
chr9:3133846-3199782	piRNA_cluster_94	98.0775	2.84047	5.10972
chr8:28404784-28406428	piRNA_cluster_84	64.7818	1.88034	5.10653
chr17:22650609-22654209	piRNA_cluster_173	95.2918	2.84925	5.0637
chr9:43952697-43956965	piRNA_cluster_95	50.0159	1.50174	5.05768
chr5:144519193-144527999	piRNA_cluster_33	58.3321	1.85015	4.97857
chr8:95938344-95946851	piRNA_cluster_86	28.4909	0.947515	4.91021
chr3:20360571-20365724	piRNA_cluster_15	11.7213	0.42799	4.77541
chr6:128133827-128150641	piRNA_cluster_58	53.8689	1.98406	4.76292
chr15:88811365-88812495	piRNA_cluster_172	34.3364	1.35845	4.6597
chr12:99619666-99621151	piRNA_cluster_135	16.8255	0.701749	4.58355
chr14:45470909-45626575	piRNA_cluster_150	32.2035	1.36307	4.56228
chr11:108280370-108283211	piRNA_cluster_132	10.6508	0.451827	4.55904
chr17:27459215-27461669	piRNA_cluster_188	21.0188	1.08224	4.27958
chr14:24937730-24939519	piRNA_cluster_148	24.8008	1.36442	4.18402
chr7:60162044-60168707	piRNA_cluster_60	35.8034	2.23798	3.99983
chr11:50754182-50757267	piRNA_cluster_130	42.4941	3.94918	3.42764
chr13:53493219-53498093	piRNA_cluster_141	50.7999	6.61823	2.94031
chr17:49251067-49252156	piRNA_cluster_189	162.767	39.6827	2.03622
chr14:25243916-25248449	piRNA_cluster_157	27.5717	7.4016	1.89728
chr5:115300314-115302629	piRNA_cluster_39	267.322	180.03	0.570339
chr17:39983504-39984882	piRNA_cluster_177	31605.5	22587.2	0.484668

## Sheet: Table S4
Table S4. CB-containing novel non-annotated transcripts.
chromosome			start	end	size
chr1	Cufflinks_novel	exon	4581695	4581763	68	transcript_id "cuff_1"; gene_id "Cuff.1"; gene_name "Cuff.1"; locus "RLOC_00000004";
chr1	Cufflinks_novel	exon	4582137	4582250	113	transcript_id "cuff_1"; gene_id "Cuff.1"; gene_name "Cuff.1"; locus "RLOC_00000004";
chr1	Cufflinks_novel	exon	4581029	4581421	392	transcript_id "cuff_1"; gene_id "Cuff.1"; gene_name "Cuff.1"; locus "RLOC_00000004";
chr1	Cufflinks_novel	exon	11313170	11313197	27	transcript_id "cuff_10"; gene_id "Cuff.10"; gene_name "Cuff.10"; locus "RLOC_00000041";
chr1	Cufflinks_novel	exon	11316711	11316922	211	transcript_id "cuff_10"; gene_id "Cuff.10"; gene_name "Cuff.10"; locus "RLOC_00000041";
chr1	Cufflinks_novel	exon	11316274	11316531	257	transcript_id "cuff_10"; gene_id "Cuff.10"; gene_name "Cuff.10"; locus "RLOC_00000041";
chr1	Cufflinks_novel	exon	11314664	11315010	346	transcript_id "cuff_10"; gene_id "Cuff.10"; gene_name "Cuff.10"; locus "RLOC_00000041";
chr1	Cufflinks_novel	exon	11315673	11316044	371	transcript_id "cuff_10"; gene_id "Cuff.10"; gene_name "Cuff.10"; locus "RLOC_00000041";
chr1	Cufflinks_novel	exon	53480074	53480210	136	transcript_id "cuff_100"; gene_id "Cuff.100"; gene_name "Cuff.100"; locus "RLOC_00000325";
chr1	Cufflinks_novel	exon	53481760	53481929	169	transcript_id "cuff_100"; gene_id "Cuff.100"; gene_name "Cuff.100"; locus "RLOC_00000325";
chr12	Cufflinks_novel	exon	7842945	7843065	120	transcript_id "cuff_1000"; gene_id "Cuff.1000"; gene_name "Cuff.1000"; locus "RLOC_00004887";
chr12	Cufflinks_novel	exon	7844054	7844225	171	transcript_id "cuff_1000"; gene_id "Cuff.1000"; gene_name "Cuff.1000"; locus "RLOC_00004887";
chr12	Cufflinks_novel	exon	7841712	7842089	377	transcript_id "cuff_1000"; gene_id "Cuff.1000"; gene_name "Cuff.1000"; locus "RLOC_00004887";
chr12	Cufflinks_novel	exon	7852930	7852993	63	transcript_id "cuff_1001"; gene_id "Cuff.1001"; gene_name "Cuff.1001"; locus "RLOC_00004888";
chr12	Cufflinks_novel	exon	7848106	7848182	76	transcript_id "cuff_1001"; gene_id "Cuff.1001"; gene_name "Cuff.1001"; locus "RLOC_00004888";
chr12	Cufflinks_novel	exon	7851799	7851955	156	transcript_id "cuff_1001"; gene_id "Cuff.1001"; gene_name "Cuff.1001"; locus "RLOC_00004888";
chr12	Cufflinks_novel	exon	7846946	7847125	179	transcript_id "cuff_1001"; gene_id "Cuff.1001"; gene_name "Cuff.1001"; locus "RLOC_00004888";
chr12	Cufflinks_novel	exon	7850774	7850959	185	transcript_id "cuff_1001"; gene_id "Cuff.1001"; gene_name "Cuff.1001"; locus "RLOC_00004888";
chr12	Cufflinks_novel	exon	7849974	7850178	204	transcript_id "cuff_1001"; gene_id "Cuff.1001"; gene_name "Cuff.1001"; locus "RLOC_00004888";
chr12	Cufflinks_novel	exon	7848981	7849195	214	transcript_id "cuff_1001"; gene_id "Cuff.1001"; gene_name "Cuff.1001"; locus "RLOC_00004888";
chr12	Cufflinks_novel	exon	7850301	7850579	278	transcript_id "cuff_1001"; gene_id "Cuff.1001"; gene_name "Cuff.1001"; locus "RLOC_00004888";
chr12	Cufflinks_novel	exon	7862459	7862488	29	transcript_id "cuff_1002"; gene_id "Cuff.1002"; gene_name "Cuff.1002"; locus "RLOC_00004889";
chr12	Cufflinks_novel	exon	7863689	7863768	79	transcript_id "cuff_1002"; gene_id "Cuff.1002"; gene_name "Cuff.1002"; locus "RLOC_00004889";
chr12	Cufflinks_novel	exon	7860480	7860605	125	transcript_id "cuff_1002"; gene_id "Cuff.1002"; gene_name "Cuff.1002"; locus "RLOC_00004889";
chr12	Cufflinks_novel	exon	7866860	7866988	128	transcript_id "cuff_1002"; gene_id "Cuff.1002"; gene_name "Cuff.1002"; locus "RLOC_00004889";
chr12	Cufflinks_novel	exon	7861284	7861422	138	transcript_id "cuff_1002"; gene_id "Cuff.1002"; gene_name "Cuff.1002"; locus "RLOC_00004889";
chr12	Cufflinks_novel	exon	7865200	7865341	141	transcript_id "cuff_1002"; gene_id "Cuff.1002"; gene_name "Cuff.1002"; locus "RLOC_00004889";
chr12	Cufflinks_novel	exon	7864960	7865133	173	transcript_id "cuff_1002"; gene_id "Cuff.1002"; gene_name "Cuff.1002"; locus "RLOC_00004889";
chr12	Cufflinks_novel	exon	7867434	7867614	180	transcript_id "cuff_1002"; gene_id "Cuff.1002"; gene_name "Cuff.1002"; locus "RLOC_00004889";
chr12	Cufflinks_novel	exon	7889084	7889111	27	transcript_id "cuff_1003"; gene_id "Cuff.1003"; gene_name "Cuff.1003"; locus "RLOC_00004890";
chr12	Cufflinks_novel	exon	7889328	7889355	27	transcript_id "cuff_1003"; gene_id "Cuff.1003"; gene_name "Cuff.1003"; locus "RLOC_00004890";
chr12	Cufflinks_novel	exon	7888681	7888750	69	transcript_id "cuff_1003"; gene_id "Cuff.1003"; gene_name "Cuff.1003"; locus "RLOC_00004890";
chr12	Cufflinks_novel	exon	7890055	7890152	97	transcript_id "cuff_1003"; gene_id "Cuff.1003"; gene_name "Cuff.1003"; locus "RLOC_00004890";
chr12	Cufflinks_novel	exon	7889793	7889900	107	transcript_id "cuff_1003"; gene_id "Cuff.1003"; gene_name "Cuff.1003"; locus "RLOC_00004890";
chr12	Cufflinks_novel	exon	7887649	7887765	116	transcript_id "cuff_1003"; gene_id "Cuff.1003"; gene_name "Cuff.1003"; locus "RLOC_00004890";
chr12	Cufflinks_novel	exon	7888084	7888239	155	transcript_id "cuff_1003"; gene_id "Cuff.1003"; gene_name "Cuff.1003"; locus "RLOC_00004890";
chr12	Cufflinks_novel	exon	7885770	7885939	169	transcript_id "cuff_1003"; gene_id "Cuff.1003"; gene_name "Cuff.1003"; locus "RLOC_00004890";
chr12	Cufflinks_novel	exon	7887108	7887286	178	transcript_id "cuff_1003"; gene_id "Cuff.1003"; gene_name "Cuff.1003"; locus "RLOC_00004890";
chr12	Cufflinks_novel	exon	7887383	7887563	180	transcript_id "cuff_1003"; gene_id "Cuff.1003"; gene_name "Cuff.1003"; locus "RLOC_00004890";
chr12	Cufflinks_novel	exon	7884551	7884754	203	transcript_id "cuff_1003"; gene_id "Cuff.1003"; gene_name "Cuff.1003"; locus "RLOC_00004890";
chr12	Cufflinks_novel	exon	7886578	7886811	233	transcript_id "cuff_1003"; gene_id "Cuff.1003"; gene_name "Cuff.1003"; locus "RLOC_00004890";
chr12	Cufflinks_novel	exon	7886030	7886316	286	transcript_id "cuff_1003"; gene_id "Cuff.1003"; gene_name "Cuff.1003"; locus "RLOC_00004890";
chr12	Cufflinks_novel	exon	7885029	7885354	325	transcript_id "cuff_1003"; gene_id "Cuff.1003"; gene_name "Cuff.1003"; locus "RLOC_00004890";
chr12	Cufflinks_novel	exon	7890323	7890672	349	transcript_id "cuff_1003"; gene_id "Cuff.1003"; gene_name "Cuff.1003"; locus "RLOC_00004890";
chr12	Cufflinks_novel	exon	8037321	8037386	65	transcript_id "cuff_1004"; gene_id "Cuff.1004"; gene_name "Cuff.1004"; locus "RLOC_00004892";
chr12	Cufflinks_novel	exon	8036210	8036280	70	transcript_id "cuff_1004"; gene_id "Cuff.1004"; gene_name "Cuff.1004"; locus "RLOC_00004892";
chr12	Cufflinks_novel	exon	8488555	8488608	53	transcript_id "cuff_1005"; gene_id "Cuff.1005"; gene_name "Cuff.1005"; locus "RLOC_00004896";
chr12	Cufflinks_novel	exon	8488680	8488955	275	transcript_id "cuff_1005"; gene_id "Cuff.1005"; gene_name "Cuff.1005"; locus "RLOC_00004896";
chr12	Cufflinks_novel	exon	8485716	8486293	577	transcript_id "cuff_1005"; gene_id "Cuff.1005"; gene_name "Cuff.1005"; locus "RLOC_00004896";
chr12	Cufflinks_novel	exon	8486404	8487798	1394	transcript_id "cuff_1005"; gene_id "Cuff.1005"; gene_name "Cuff.1005"; locus "RLOC_00004896";
chr12	Cufflinks_novel	exon	9049212	9049239	27	transcript_id "cuff_1006"; gene_id "Cuff.1006"; gene_name "Cuff.1006"; locus "RLOC_00004905";
chr12	Cufflinks_novel	exon	9048523	9048692	169	transcript_id "cuff_1006"; gene_id "Cuff.1006"; gene_name "Cuff.1006"; locus "RLOC_00004905";
chr12	Cufflinks_novel	exon	10159984	10160011	27	transcript_id "cuff_1007"; gene_id "Cuff.1007"; gene_name "Cuff.1007"; locus "RLOC_00004907";
chr12	Cufflinks_novel	exon	10163913	10163940	27	transcript_id "cuff_1007"; gene_id "Cuff.1007"; gene_name "Cuff.1007"; locus "RLOC_00004907";
chr12	Cufflinks_novel	exon	10160640	10160761	121	transcript_id "cuff_1007"; gene_id "Cuff.1007"; gene_name "Cuff.1007"; locus "RLOC_00004907";
chr12	Cufflinks_novel	exon	10159253	10159416	163	transcript_id "cuff_1007"; gene_id "Cuff.1007"; gene_name "Cuff.1007"; locus "RLOC_00004907";
chr12	Cufflinks_novel	exon	10161771	10162031	260	transcript_id "cuff_1007"; gene_id "Cuff.1007"; gene_name "Cuff.1007"; locus "RLOC_00004907";
chr12	Cufflinks_novel	exon	10163130	10163426	296	transcript_id "cuff_1007"; gene_id "Cuff.1007"; gene_name "Cuff.1007"; locus "RLOC_00004907";
chr12	Cufflinks_novel	exon	10164553	10165180	627	transcript_id "cuff_1007"; gene_id "Cuff.1007"; gene_name "Cuff.1007"; locus "RLOC_00004907";
chr12	Cufflinks_novel	exon	10731297	10731393	96	transcript_id "cuff_1008"; gene_id "Cuff.1008"; gene_name "Cuff.1008"; locus "RLOC_00004910";
chr12	Cufflinks_novel	exon	10730663	10730918	255	transcript_id "cuff_1008"; gene_id "Cuff.1008"; gene_name "Cuff.1008"; locus "RLOC_00004910";
chr12	Cufflinks_novel	exon	11445872	11445899	27	transcript_id "cuff_1009"; gene_id "Cuff.1009"; gene_name "Cuff.1009"; locus "RLOC_00004916";
chr12	Cufflinks_novel	exon	11447670	11447700	30	transcript_id "cuff_1009"; gene_id "Cuff.1009"; gene_name "Cuff.1009"; locus "RLOC_00004916";
chr1	Cufflinks_novel	exon	53505792	53505822	30	transcript_id "cuff_101"; gene_id "Cuff.101"; gene_name "Cuff.101"; locus "RLOC_00000326";
chr1	Cufflinks_novel	exon	53504125	53504446	321	transcript_id "cuff_101"; gene_id "Cuff.101"; gene_name "Cuff.101"; locus "RLOC_00000326";
chr12	Cufflinks_novel	exon	11450426	11450453	27	transcript_id "cuff_1010"; gene_id "Cuff.1010"; gene_name "Cuff.1010"; locus "RLOC_00004917";
chr12	Cufflinks_novel	exon	11449784	11449878	94	transcript_id "cuff_1010"; gene_id "Cuff.1010"; gene_name "Cuff.1010"; locus "RLOC_00004917";
chr12	Cufflinks_novel	exon	11450527	11451038	511	transcript_id "cuff_1010"; gene_id "Cuff.1010"; gene_name "Cuff.1010"; locus "RLOC_00004917";
chr12	Cufflinks_novel	exon	12712199	12712226	27	transcript_id "cuff_1011"; gene_id "Cuff.1011"; gene_name "Cuff.1011"; locus "RLOC_00004921";
chr12	Cufflinks_novel	exon	12713519	12713657	138	transcript_id "cuff_1011"; gene_id "Cuff.1011"; gene_name "Cuff.1011"; locus "RLOC_00004921";
chr12	Cufflinks_novel	exon	12919351	12919429	78	transcript_id "cuff_1012"; gene_id "Cuff.1012"; gene_name "Cuff.1012"; locus "RLOC_00004922";
chr12	Cufflinks_novel	exon	12918040	12918125	85	transcript_id "cuff_1012"; gene_id "Cuff.1012"; gene_name "Cuff.1012"; locus "RLOC_00004922";
chr12	Cufflinks_novel	exon	12919664	12919782	118	transcript_id "cuff_1012"; gene_id "Cuff.1012"; gene_name "Cuff.1012"; locus "RLOC_00004922";
chr12	Cufflinks_novel	exon	12916291	12916416	125	transcript_id "cuff_1012"; gene_id "Cuff.1012"; gene_name "Cuff.1012"; locus "RLOC_00004922";
chr12	Cufflinks_novel	exon	12994579	12994606	27	transcript_id "cuff_1013"; gene_id "Cuff.1013"; gene_name "Cuff.1013"; locus "RLOC_00004924";
chr12	Cufflinks_novel	exon	12995681	12995708	27	transcript_id "cuff_1013"; gene_id "Cuff.1013"; gene_name "Cuff.1013"; locus "RLOC_00004924";
chr12	Cufflinks_novel	exon	14159309	14159336	27	transcript_id "cuff_1014"; gene_id "Cuff.1014"; gene_name "Cuff.1014"; locus "RLOC_00004928";
chr12	Cufflinks_novel	exon	14159033	14159085	52	transcript_id "cuff_1014"; gene_id "Cuff.1014"; gene_name "Cuff.1014"; locus "RLOC_00004928";
chr12	Cufflinks_novel	exon	15003761	15003788	27	transcript_id "cuff_1015"; gene_id "Cuff.1015"; gene_name "Cuff.1015"; locus "RLOC_00004929";
chr12	Cufflinks_novel	exon	15007294	15007441	147	transcript_id "cuff_1015"; gene_id "Cuff.1015"; gene_name "Cuff.1015"; locus "RLOC_00004929";
chr12	Cufflinks_novel	exon	15004070	15004349	279	transcript_id "cuff_1015"; gene_id "Cuff.1015"; gene_name "Cuff.1015"; locus "RLOC_00004929";
chr12	Cufflinks_novel	exon	15003321	15003607	286	transcript_id "cuff_1015"; gene_id "Cuff.1015"; gene_name "Cuff.1015"; locus "RLOC_00004929";
chr12	Cufflinks_novel	exon	15006743	15007094	351	transcript_id "cuff_1015"; gene_id "Cuff.1015"; gene_name "Cuff.1015"; locus "RLOC_00004929";
chr12	Cufflinks_novel	exon	15004800	15005499	699	transcript_id "cuff_1015"; gene_id "Cuff.1015"; gene_name "Cuff.1015"; locus "RLOC_00004929";
chr12	Cufflinks_novel	exon	15026217	15026410	193	transcript_id "cuff_1016"; gene_id "Cuff.1016"; gene_name "Cuff.1016"; locus "RLOC_00004930";
chr12	Cufflinks_novel	exon	15025723	15026081	358	transcript_id "cuff_1016"; gene_id "Cuff.1016"; gene_name "Cuff.1016"; locus "RLOC_00004930";
chr12	Cufflinks_novel	exon	15031175	15031266	91	transcript_id "cuff_1017"; gene_id "Cuff.1017"; gene_name "Cuff.1017"; locus "RLOC_00004931";
chr12	Cufflinks_novel	exon	15032621	15032759	138	transcript_id "cuff_1017"; gene_id "Cuff.1017"; gene_name "Cuff.1017"; locus "RLOC_00004931";
chr12	Cufflinks_novel	exon	15048204	15048241	37	transcript_id "cuff_1018"; gene_id "Cuff.1018"; gene_name "Cuff.1018"; locus "RLOC_00004932";
chr12	Cufflinks_novel	exon	15045695	15045743	48	transcript_id "cuff_1018"; gene_id "Cuff.1018"; gene_name "Cuff.1018"; locus "RLOC_00004932";
chr12	Cufflinks_novel	exon	15047530	15047589	59	transcript_id "cuff_1018"; gene_id "Cuff.1018"; gene_name "Cuff.1018"; locus "RLOC_00004932";
chr12	Cufflinks_novel	exon	15047960	15048057	97	transcript_id "cuff_1018"; gene_id "Cuff.1018"; gene_name "Cuff.1018"; locus "RLOC_00004932";
chr12	Cufflinks_novel	exon	15045392	15045510	118	transcript_id "cuff_1018"; gene_id "Cuff.1018"; gene_name "Cuff.1018"; locus "RLOC_00004932";
chr12	Cufflinks_novel	exon	15048653	15048805	152	transcript_id "cuff_1018"; gene_id "Cuff.1018"; gene_name "Cuff.1018"; locus "RLOC_00004932";
chr12	Cufflinks_novel	exon	15046106	15046268	162	transcript_id "cuff_1018"; gene_id "Cuff.1018"; gene_name "Cuff.1018"; locus "RLOC_00004932";
chr12	Cufflinks_novel	exon	15050339	15050511	172	transcript_id "cuff_1018"; gene_id "Cuff.1018"; gene_name "Cuff.1018"; locus "RLOC_00004932";
chr12	Cufflinks_novel	exon	15046852	15047083	231	transcript_id "cuff_1018"; gene_id "Cuff.1018"; gene_name "Cuff.1018"; locus "RLOC_00004932";
chr12	Cufflinks_novel	exon	15055650	15055730	80	transcript_id "cuff_1019"; gene_id "Cuff.1019"; gene_name "Cuff.1019"; locus "RLOC_00004933";
chr12	Cufflinks_novel	exon	15056147	15056228	81	transcript_id "cuff_1019"; gene_id "Cuff.1019"; gene_name "Cuff.1019"; locus "RLOC_00004933";
chr12	Cufflinks_novel	exon	15054657	15054824	167	transcript_id "cuff_1019"; gene_id "Cuff.1019"; gene_name "Cuff.1019"; locus "RLOC_00004933";
chr12	Cufflinks_novel	exon	15058071	15058522	451	transcript_id "cuff_1019"; gene_id "Cuff.1019"; gene_name "Cuff.1019"; locus "RLOC_00004933";
chr1	Cufflinks_novel	exon	53514504	53514642	138	transcript_id "cuff_102"; gene_id "Cuff.102"; gene_name "Cuff.102"; locus "RLOC_00000327";
chr1	Cufflinks_novel	exon	53513357	53513747	390	transcript_id "cuff_102"; gene_id "Cuff.102"; gene_name "Cuff.102"; locus "RLOC_00000327";
chr12	Cufflinks_novel	exon	15071642	15071669	27	transcript_id "cuff_1020"; gene_id "Cuff.1020"; gene_name "Cuff.1020"; locus "RLOC_00004934";
chr12	Cufflinks_novel	exon	15070301	15070348	47	transcript_id "cuff_1020"; gene_id "Cuff.1020"; gene_name "Cuff.1020"; locus "RLOC_00004934";
chr12	Cufflinks_novel	exon	15068176	15068226	50	transcript_id "cuff_1020"; gene_id "Cuff.1020"; gene_name "Cuff.1020"; locus "RLOC_00004934";
chr12	Cufflinks_novel	exon	15068577	15068641	64	transcript_id "cuff_1020"; gene_id "Cuff.1020"; gene_name "Cuff.1020"; locus "RLOC_00004934";
chr12	Cufflinks_novel	exon	15069420	15069615	195	transcript_id "cuff_1020"; gene_id "Cuff.1020"; gene_name "Cuff.1020"; locus "RLOC_00004934";
chr12	Cufflinks_novel	exon	15073690	15073791	101	transcript_id "cuff_1021"; gene_id "Cuff.1021"; gene_name "Cuff.1021"; locus "RLOC_00004935";
chr12	Cufflinks_novel	exon	15075084	15075198	114	transcript_id "cuff_1021"; gene_id "Cuff.1021"; gene_name "Cuff.1021"; locus "RLOC_00004935";
chr12	Cufflinks_novel	exon	15075312	15075528	216	transcript_id "cuff_1021"; gene_id "Cuff.1021"; gene_name "Cuff.1021"; locus "RLOC_00004935";
chr12	Cufflinks_novel	exon	15100380	15100407	27	transcript_id "cuff_1022"; gene_id "Cuff.1022"; gene_name "Cuff.1022"; locus "RLOC_00004936";
chr12	Cufflinks_novel	exon	15099824	15099869	45	transcript_id "cuff_1022"; gene_id "Cuff.1022"; gene_name "Cuff.1022"; locus "RLOC_00004936";
chr12	Cufflinks_novel	exon	15111230	15111257	27	transcript_id "cuff_1023"; gene_id "Cuff.1023"; gene_name "Cuff.1023"; locus "RLOC_00004937";
chr12	Cufflinks_novel	exon	15110873	15110999	126	transcript_id "cuff_1023"; gene_id "Cuff.1023"; gene_name "Cuff.1023"; locus "RLOC_00004937";
chr12	Cufflinks_novel	exon	15110509	15110715	206	transcript_id "cuff_1023"; gene_id "Cuff.1023"; gene_name "Cuff.1023"; locus "RLOC_00004937";
chr12	Cufflinks_novel	exon	15109604	15109854	250	transcript_id "cuff_1023"; gene_id "Cuff.1023"; gene_name "Cuff.1023"; locus "RLOC_00004937";
chr12	Cufflinks_novel	exon	16608015	16608043	28	transcript_id "cuff_1024"; gene_id "Cuff.1024"; gene_name "Cuff.1024"; locus "RLOC_00004940";
chr12	Cufflinks_novel	exon	16604015	16604101	86	transcript_id "cuff_1024"; gene_id "Cuff.1024"; gene_name "Cuff.1024"; locus "RLOC_00004940";
chr12	Cufflinks_novel	exon	16601492	16601596	104	transcript_id "cuff_1024"; gene_id "Cuff.1024"; gene_name "Cuff.1024"; locus "RLOC_00004940";
chr12	Cufflinks_novel	exon	16601908	16602060	152	transcript_id "cuff_1024"; gene_id "Cuff.1024"; gene_name "Cuff.1024"; locus "RLOC_00004940";
chr12	Cufflinks_novel	exon	16605952	16606142	190	transcript_id "cuff_1024"; gene_id "Cuff.1024"; gene_name "Cuff.1024"; locus "RLOC_00004940";
chr12	Cufflinks_novel	exon	16616235	16616262	27	transcript_id "cuff_1025"; gene_id "Cuff.1025"; gene_name "Cuff.1025"; locus "RLOC_00004941";
chr12	Cufflinks_novel	exon	16614111	16614240	129	transcript_id "cuff_1025"; gene_id "Cuff.1025"; gene_name "Cuff.1025"; locus "RLOC_00004941";
chr12	Cufflinks_novel	exon	16617395	16617793	398	transcript_id "cuff_1025"; gene_id "Cuff.1025"; gene_name "Cuff.1025"; locus "RLOC_00004941";
chr12	Cufflinks_novel	exon	16814871	16814898	27	transcript_id "cuff_1026"; gene_id "Cuff.1026"; gene_name "Cuff.1026"; locus "RLOC_00004944";
chr12	Cufflinks_novel	exon	16815569	16815751	182	transcript_id "cuff_1026"; gene_id "Cuff.1026"; gene_name "Cuff.1026"; locus "RLOC_00004944";
chr12	Cufflinks_novel	exon	17225279	17225340	61	transcript_id "cuff_1027"; gene_id "Cuff.1027"; gene_name "Cuff.1027"; locus "RLOC_00004950";
chr12	Cufflinks_novel	exon	17227251	17227366	115	transcript_id "cuff_1027"; gene_id "Cuff.1027"; gene_name "Cuff.1027"; locus "RLOC_00004950";
chr12	Cufflinks_novel	exon	17234673	17234872	199	transcript_id "cuff_1028"; gene_id "Cuff.1028"; gene_name "Cuff.1028"; locus "RLOC_00004951";
chr12	Cufflinks_novel	exon	17233046	17233428	382	transcript_id "cuff_1028"; gene_id "Cuff.1028"; gene_name "Cuff.1028"; locus "RLOC_00004951";
chr12	Cufflinks_novel	exon	21423457	21423484	27	transcript_id "cuff_1029"; gene_id "Cuff.1029"; gene_name "Cuff.1029"; locus "RLOC_00004967";
chr12	Cufflinks_novel	exon	21425077	21425104	27	transcript_id "cuff_1029"; gene_id "Cuff.1029"; gene_name "Cuff.1029"; locus "RLOC_00004967";
chr12	Cufflinks_novel	exon	21424545	21424708	163	transcript_id "cuff_1029"; gene_id "Cuff.1029"; gene_name "Cuff.1029"; locus "RLOC_00004967";
chr12	Cufflinks_novel	exon	21423870	21424115	245	transcript_id "cuff_1029"; gene_id "Cuff.1029"; gene_name "Cuff.1029"; locus "RLOC_00004967";
chr1	Cufflinks_novel	exon	53525475	53525510	35	transcript_id "cuff_103"; gene_id "Cuff.103"; gene_name "Cuff.103"; locus "RLOC_00000328";
chr1	Cufflinks_novel	exon	53526842	53526953	111	transcript_id "cuff_103"; gene_id "Cuff.103"; gene_name "Cuff.103"; locus "RLOC_00000328";
chr12	Cufflinks_novel	exon	25816304	25816331	27	transcript_id "cuff_1030"; gene_id "Cuff.1030"; gene_name "Cuff.1030"; locus "RLOC_00004977";
chr12	Cufflinks_novel	exon	25816440	25816502	62	transcript_id "cuff_1030"; gene_id "Cuff.1030"; gene_name "Cuff.1030"; locus "RLOC_00004977";
chr12	Cufflinks_novel	exon	26557328	26557355	27	transcript_id "cuff_1031"; gene_id "Cuff.1031"; gene_name "Cuff.1031"; locus "RLOC_00004978";
chr12	Cufflinks_novel	exon	26556081	26556380	299	transcript_id "cuff_1031"; gene_id "Cuff.1031"; gene_name "Cuff.1031"; locus "RLOC_00004978";
chr12	Cufflinks_novel	exon	27826512	27826539	27	transcript_id "cuff_1032"; gene_id "Cuff.1032"; gene_name "Cuff.1032"; locus "RLOC_00004982";
chr12	Cufflinks_novel	exon	27826888	27826915	27	transcript_id "cuff_1032"; gene_id "Cuff.1032"; gene_name "Cuff.1032"; locus "RLOC_00004982";
chr12	Cufflinks_novel	exon	27825809	27825848	39	transcript_id "cuff_1032"; gene_id "Cuff.1032"; gene_name "Cuff.1032"; locus "RLOC_00004982";
chr12	Cufflinks_novel	exon	27826113	27826188	75	transcript_id "cuff_1032"; gene_id "Cuff.1032"; gene_name "Cuff.1032"; locus "RLOC_00004982";
chr12	Cufflinks_novel	exon	27825967	27826062	95	transcript_id "cuff_1032"; gene_id "Cuff.1032"; gene_name "Cuff.1032"; locus "RLOC_00004982";
chr12	Cufflinks_novel	exon	28358537	28358565	28	transcript_id "cuff_1033"; gene_id "Cuff.1033"; gene_name "Cuff.1033"; locus "RLOC_00004984";
chr12	Cufflinks_novel	exon	28359396	28359443	47	transcript_id "cuff_1033"; gene_id "Cuff.1033"; gene_name "Cuff.1033"; locus "RLOC_00004984";
chr12	Cufflinks_novel	exon	28407657	28407684	27	transcript_id "cuff_1034"; gene_id "Cuff.1034"; gene_name "Cuff.1034"; locus "RLOC_00004985";
chr12	Cufflinks_novel	exon	28407791	28407871	80	transcript_id "cuff_1034"; gene_id "Cuff.1034"; gene_name "Cuff.1034"; locus "RLOC_00004985";
chr12	Cufflinks_novel	exon	28424086	28424113	27	transcript_id "cuff_1035"; gene_id "Cuff.1035"; gene_name "Cuff.1035"; locus "RLOC_00004986";
chr12	Cufflinks_novel	exon	28425590	28425658	68	transcript_id "cuff_1035"; gene_id "Cuff.1035"; gene_name "Cuff.1035"; locus "RLOC_00004986";
chr12	Cufflinks_novel	exon	28739786	28739828	42	transcript_id "cuff_1036"; gene_id "Cuff.1036"; gene_name "Cuff.1036"; locus "RLOC_00004987";
chr12	Cufflinks_novel	exon	28740094	28740180	86	transcript_id "cuff_1036"; gene_id "Cuff.1036"; gene_name "Cuff.1036"; locus "RLOC_00004987";
chr12	Cufflinks_novel	exon	28740247	28740389	142	transcript_id "cuff_1036"; gene_id "Cuff.1036"; gene_name "Cuff.1036"; locus "RLOC_00004987";
chr12	Cufflinks_novel	exon	29235286	29235444	158	transcript_id "cuff_1037"; gene_id "Cuff.1037"; gene_name "Cuff.1037"; locus "RLOC_00004989";
chr12	Cufflinks_novel	exon	29236052	29236224	172	transcript_id "cuff_1037"; gene_id "Cuff.1037"; gene_name "Cuff.1037"; locus "RLOC_00004989";
chr12	Cufflinks_novel	exon	29436328	29436355	27	transcript_id "cuff_1038"; gene_id "Cuff.1038"; gene_name "Cuff.1038"; locus "RLOC_00004996";
chr12	Cufflinks_novel	exon	29436415	29436505	90	transcript_id "cuff_1038"; gene_id "Cuff.1038"; gene_name "Cuff.1038"; locus "RLOC_00004996";
chr12	Cufflinks_novel	exon	29435475	29435640	165	transcript_id "cuff_1038"; gene_id "Cuff.1038"; gene_name "Cuff.1038"; locus "RLOC_00004996";
chr12	Cufflinks_novel	exon	29435895	29436182	287	transcript_id "cuff_1038"; gene_id "Cuff.1038"; gene_name "Cuff.1038"; locus "RLOC_00004996";
chr12	Cufflinks_novel	exon	29594910	29594937	27	transcript_id "cuff_1039"; gene_id "Cuff.1039"; gene_name "Cuff.1039"; locus "RLOC_00004998";
chr12	Cufflinks_novel	exon	29595674	29595702	28	transcript_id "cuff_1039"; gene_id "Cuff.1039"; gene_name "Cuff.1039"; locus "RLOC_00004998";
chr1	Cufflinks_novel	exon	53530153	53530180	27	transcript_id "cuff_104"; gene_id "Cuff.104"; gene_name "Cuff.104"; locus "RLOC_00000329";
chr1	Cufflinks_novel	exon	53530563	53530661	98	transcript_id "cuff_104"; gene_id "Cuff.104"; gene_name "Cuff.104"; locus "RLOC_00000329";
chr12	Cufflinks_novel	exon	29642099	29642238	139	transcript_id "cuff_1040"; gene_id "Cuff.1040"; gene_name "Cuff.1040"; locus "RLOC_00004999";
chr12	Cufflinks_novel	exon	29641095	29641294	199	transcript_id "cuff_1040"; gene_id "Cuff.1040"; gene_name "Cuff.1040"; locus "RLOC_00004999";
chr12	Cufflinks_novel	exon	29648125	29648179	54	transcript_id "cuff_1041"; gene_id "Cuff.1041"; gene_name "Cuff.1041"; locus "RLOC_00005000";
chr12	Cufflinks_novel	exon	29646180	29646316	136	transcript_id "cuff_1041"; gene_id "Cuff.1041"; gene_name "Cuff.1041"; locus "RLOC_00005000";
chr12	Cufflinks_novel	exon	29644678	29644899	221	transcript_id "cuff_1041"; gene_id "Cuff.1041"; gene_name "Cuff.1041"; locus "RLOC_00005000";
chr12	Cufflinks_novel	exon	32186843	32186927	84	transcript_id "cuff_1042"; gene_id "Cuff.1042"; gene_name "Cuff.1042"; locus "RLOC_00005014";
chr12	Cufflinks_novel	exon	32185122	32185262	140	transcript_id "cuff_1042"; gene_id "Cuff.1042"; gene_name "Cuff.1042"; locus "RLOC_00005014";
chr12	Cufflinks_novel	exon	32637132	32637159	27	transcript_id "cuff_1043"; gene_id "Cuff.1043"; gene_name "Cuff.1043"; locus "RLOC_00005021";
chr12	Cufflinks_novel	exon	32636404	32636440	36	transcript_id "cuff_1043"; gene_id "Cuff.1043"; gene_name "Cuff.1043"; locus "RLOC_00005021";
chr12	Cufflinks_novel	exon	32635956	32636015	59	transcript_id "cuff_1043"; gene_id "Cuff.1043"; gene_name "Cuff.1043"; locus "RLOC_00005021";
chr12	Cufflinks_novel	exon	32635419	32635528	109	transcript_id "cuff_1043"; gene_id "Cuff.1043"; gene_name "Cuff.1043"; locus "RLOC_00005021";
chr12	Cufflinks_novel	exon	32933406	32933433	27	transcript_id "cuff_1044"; gene_id "Cuff.1044"; gene_name "Cuff.1044"; locus "RLOC_00005024";
chr12	Cufflinks_novel	exon	32931204	32931233	29	transcript_id "cuff_1044"; gene_id "Cuff.1044"; gene_name "Cuff.1044"; locus "RLOC_00005024";
chr12	Cufflinks_novel	exon	32932609	32932666	57	transcript_id "cuff_1044"; gene_id "Cuff.1044"; gene_name "Cuff.1044"; locus "RLOC_00005024";
chr12	Cufflinks_novel	exon	32983887	32983914	27	transcript_id "cuff_1045"; gene_id "Cuff.1045"; gene_name "Cuff.1045"; locus "RLOC_00005025";
chr12	Cufflinks_novel	exon	32982716	32982849	133	transcript_id "cuff_1045"; gene_id "Cuff.1045"; gene_name "Cuff.1045"; locus "RLOC_00005025";
chr12	Cufflinks_novel	exon	33077466	33077495	29	transcript_id "cuff_1046"; gene_id "Cuff.1046"; gene_name "Cuff.1046"; locus "RLOC_00005027";
chr12	Cufflinks_novel	exon	33077306	33077362	56	transcript_id "cuff_1046"; gene_id "Cuff.1046"; gene_name "Cuff.1046"; locus "RLOC_00005027";
chr12	Cufflinks_novel	exon	33077105	33077218	113	transcript_id "cuff_1046"; gene_id "Cuff.1046"; gene_name "Cuff.1046"; locus "RLOC_00005027";
chr12	Cufflinks_novel	exon	33113874	33113941	67	transcript_id "cuff_1047"; gene_id "Cuff.1047"; gene_name "Cuff.1047"; locus "RLOC_00005028";
chr12	Cufflinks_novel	exon	33113994	33114114	120	transcript_id "cuff_1047"; gene_id "Cuff.1047"; gene_name "Cuff.1047"; locus "RLOC_00005028";
chr12	Cufflinks_novel	exon	33397179	33397211	32	transcript_id "cuff_1048"; gene_id "Cuff.1048"; gene_name "Cuff.1048"; locus "RLOC_00005029";
chr12	Cufflinks_novel	exon	33396922	33396964	42	transcript_id "cuff_1048"; gene_id "Cuff.1048"; gene_name "Cuff.1048"; locus "RLOC_00005029";
chr12	Cufflinks_novel	exon	33396445	33396547	102	transcript_id "cuff_1048"; gene_id "Cuff.1048"; gene_name "Cuff.1048"; locus "RLOC_00005029";
chr12	Cufflinks_novel	exon	33396599	33396734	135	transcript_id "cuff_1048"; gene_id "Cuff.1048"; gene_name "Cuff.1048"; locus "RLOC_00005029";
chr12	Cufflinks_novel	exon	33562653	33562680	27	transcript_id "cuff_1049"; gene_id "Cuff.1049"; gene_name "Cuff.1049"; locus "RLOC_00005031";
chr12	Cufflinks_novel	exon	33561958	33562024	66	transcript_id "cuff_1049"; gene_id "Cuff.1049"; gene_name "Cuff.1049"; locus "RLOC_00005031";
chr1	Cufflinks_novel	exon	53552806	53552851	45	transcript_id "cuff_105"; gene_id "Cuff.105"; gene_name "Cuff.105"; locus "RLOC_00000330";
chr1	Cufflinks_novel	exon	53553666	53553970	304	transcript_id "cuff_105"; gene_id "Cuff.105"; gene_name "Cuff.105"; locus "RLOC_00000330";
chr12	Cufflinks_novel	exon	33596455	33596514	59	transcript_id "cuff_1050"; gene_id "Cuff.1050"; gene_name "Cuff.1050"; locus "RLOC_00005032";
chr12	Cufflinks_novel	exon	33595009	33595081	72	transcript_id "cuff_1050"; gene_id "Cuff.1050"; gene_name "Cuff.1050"; locus "RLOC_00005032";
chr12	Cufflinks_novel	exon	33595494	33595769	275	transcript_id "cuff_1050"; gene_id "Cuff.1050"; gene_name "Cuff.1050"; locus "RLOC_00005032";
chr12	Cufflinks_novel	exon	33594262	33594784	522	transcript_id "cuff_1050"; gene_id "Cuff.1050"; gene_name "Cuff.1050"; locus "RLOC_00005032";
chr12	Cufflinks_novel	exon	33606233	33606284	51	transcript_id "cuff_1051"; gene_id "Cuff.1051"; gene_name "Cuff.1051"; locus "RLOC_00005033";
chr12	Cufflinks_novel	exon	33603542	33603723	181	transcript_id "cuff_1051"; gene_id "Cuff.1051"; gene_name "Cuff.1051"; locus "RLOC_00005033";
chr12	Cufflinks_novel	exon	33605369	33605609	240	transcript_id "cuff_1051"; gene_id "Cuff.1051"; gene_name "Cuff.1051"; locus "RLOC_00005033";
chr12	Cufflinks_novel	exon	33604574	33604838	264	transcript_id "cuff_1051"; gene_id "Cuff.1051"; gene_name "Cuff.1051"; locus "RLOC_00005033";
chr12	Cufflinks_novel	exon	33616248	33616275	27	transcript_id "cuff_1052"; gene_id "Cuff.1052"; gene_name "Cuff.1052"; locus "RLOC_00005034";
chr12	Cufflinks_novel	exon	33615617	33615668	51	transcript_id "cuff_1052"; gene_id "Cuff.1052"; gene_name "Cuff.1052"; locus "RLOC_00005034";
chr12	Cufflinks_novel	exon	33608871	33608956	85	transcript_id "cuff_1052"; gene_id "Cuff.1052"; gene_name "Cuff.1052"; locus "RLOC_00005034";
chr12	Cufflinks_novel	exon	33610873	33610960	87	transcript_id "cuff_1052"; gene_id "Cuff.1052"; gene_name "Cuff.1052"; locus "RLOC_00005034";
chr12	Cufflinks_novel	exon	33614754	33614862	108	transcript_id "cuff_1052"; gene_id "Cuff.1052"; gene_name "Cuff.1052"; locus "RLOC_00005034";
chr12	Cufflinks_novel	exon	33617293	33617407	114	transcript_id "cuff_1052"; gene_id "Cuff.1052"; gene_name "Cuff.1052"; locus "RLOC_00005034";
chr12	Cufflinks_novel	exon	33611618	33611743	125	transcript_id "cuff_1052"; gene_id "Cuff.1052"; gene_name "Cuff.1052"; locus "RLOC_00005034";
chr12	Cufflinks_novel	exon	33611327	33611481	154	transcript_id "cuff_1052"; gene_id "Cuff.1052"; gene_name "Cuff.1052"; locus "RLOC_00005034";
chr12	Cufflinks_novel	exon	33616330	33616506	176	transcript_id "cuff_1052"; gene_id "Cuff.1052"; gene_name "Cuff.1052"; locus "RLOC_00005034";
chr12	Cufflinks_novel	exon	33618817	33618997	180	transcript_id "cuff_1052"; gene_id "Cuff.1052"; gene_name "Cuff.1052"; locus "RLOC_00005034";
chr12	Cufflinks_novel	exon	33611017	33611216	199	transcript_id "cuff_1052"; gene_id "Cuff.1052"; gene_name "Cuff.1052"; locus "RLOC_00005034";
chr12	Cufflinks_novel	exon	33619569	33619795	226	transcript_id "cuff_1052"; gene_id "Cuff.1052"; gene_name "Cuff.1052"; locus "RLOC_00005034";
chr12	Cufflinks_novel	exon	33614954	33615232	278	transcript_id "cuff_1052"; gene_id "Cuff.1052"; gene_name "Cuff.1052"; locus "RLOC_00005034";
chr12	Cufflinks_novel	exon	33609152	33609441	289	transcript_id "cuff_1052"; gene_id "Cuff.1052"; gene_name "Cuff.1052"; locus "RLOC_00005034";
chr12	Cufflinks_novel	exon	33612028	33612385	357	transcript_id "cuff_1052"; gene_id "Cuff.1052"; gene_name "Cuff.1052"; locus "RLOC_00005034";
chr12	Cufflinks_novel	exon	33609945	33610371	426	transcript_id "cuff_1052"; gene_id "Cuff.1052"; gene_name "Cuff.1052"; locus "RLOC_00005034";
chr12	Cufflinks_novel	exon	33613322	33613760	438	transcript_id "cuff_1052"; gene_id "Cuff.1052"; gene_name "Cuff.1052"; locus "RLOC_00005034";
chr12	Cufflinks_novel	exon	33612699	33613207	508	transcript_id "cuff_1052"; gene_id "Cuff.1052"; gene_name "Cuff.1052"; locus "RLOC_00005034";
chr12	Cufflinks_novel	exon	33613958	33614686	728	transcript_id "cuff_1052"; gene_id "Cuff.1052"; gene_name "Cuff.1052"; locus "RLOC_00005034";
chr12	Cufflinks_novel	exon	33626270	33626354	84	transcript_id "cuff_1053"; gene_id "Cuff.1053"; gene_name "Cuff.1053"; locus "RLOC_00005035";
chr12	Cufflinks_novel	exon	33623490	33623592	102	transcript_id "cuff_1053"; gene_id "Cuff.1053"; gene_name "Cuff.1053"; locus "RLOC_00005035";
chr12	Cufflinks_novel	exon	33626644	33626832	188	transcript_id "cuff_1053"; gene_id "Cuff.1053"; gene_name "Cuff.1053"; locus "RLOC_00005035";
chr12	Cufflinks_novel	exon	33627968	33628162	194	transcript_id "cuff_1053"; gene_id "Cuff.1053"; gene_name "Cuff.1053"; locus "RLOC_00005035";
chr12	Cufflinks_novel	exon	33625567	33625807	240	transcript_id "cuff_1053"; gene_id "Cuff.1053"; gene_name "Cuff.1053"; locus "RLOC_00005035";
chr12	Cufflinks_novel	exon	33630830	33631076	246	transcript_id "cuff_1053"; gene_id "Cuff.1053"; gene_name "Cuff.1053"; locus "RLOC_00005035";
chr12	Cufflinks_novel	exon	33631192	33631459	267	transcript_id "cuff_1053"; gene_id "Cuff.1053"; gene_name "Cuff.1053"; locus "RLOC_00005035";
chr12	Cufflinks_novel	exon	33629097	33629389	292	transcript_id "cuff_1053"; gene_id "Cuff.1053"; gene_name "Cuff.1053"; locus "RLOC_00005035";
chr12	Cufflinks_novel	exon	33622341	33622653	312	transcript_id "cuff_1053"; gene_id "Cuff.1053"; gene_name "Cuff.1053"; locus "RLOC_00005035";
chr12	Cufflinks_novel	exon	33626989	33627359	370	transcript_id "cuff_1053"; gene_id "Cuff.1053"; gene_name "Cuff.1053"; locus "RLOC_00005035";
chr12	Cufflinks_novel	exon	33638323	33638470	147	transcript_id "cuff_1054"; gene_id "Cuff.1054"; gene_name "Cuff.1054"; locus "RLOC_00005036";
chr12	Cufflinks_novel	exon	33634695	33634846	151	transcript_id "cuff_1054"; gene_id "Cuff.1054"; gene_name "Cuff.1054"; locus "RLOC_00005036";
chr12	Cufflinks_novel	exon	33637609	33637760	151	transcript_id "cuff_1054"; gene_id "Cuff.1054"; gene_name "Cuff.1054"; locus "RLOC_00005036";
chr12	Cufflinks_novel	exon	33635155	33635322	167	transcript_id "cuff_1054"; gene_id "Cuff.1054"; gene_name "Cuff.1054"; locus "RLOC_00005036";
chr12	Cufflinks_novel	exon	33638038	33638249	211	transcript_id "cuff_1054"; gene_id "Cuff.1054"; gene_name "Cuff.1054"; locus "RLOC_00005036";
chr12	Cufflinks_novel	exon	33636911	33637296	385	transcript_id "cuff_1054"; gene_id "Cuff.1054"; gene_name "Cuff.1054"; locus "RLOC_00005036";
chr12	Cufflinks_novel	exon	33939245	33939272	27	transcript_id "cuff_1055"; gene_id "Cuff.1055"; gene_name "Cuff.1055"; locus "RLOC_00005041";
chr12	Cufflinks_novel	exon	33939925	33939952	27	transcript_id "cuff_1055"; gene_id "Cuff.1055"; gene_name "Cuff.1055"; locus "RLOC_00005041";
chr12	Cufflinks_novel	exon	34606903	34606932	29	transcript_id "cuff_1056"; gene_id "Cuff.1056"; gene_name "Cuff.1056"; locus "RLOC_00005045";
chr12	Cufflinks_novel	exon	34605152	34605224	72	transcript_id "cuff_1056"; gene_id "Cuff.1056"; gene_name "Cuff.1056"; locus "RLOC_00005045";
chr12	Cufflinks_novel	exon	35559059	35559086	27	transcript_id "cuff_1057"; gene_id "Cuff.1057"; gene_name "Cuff.1057"; locus "RLOC_00005049";
chr12	Cufflinks_novel	exon	35557438	35557467	29	transcript_id "cuff_1057"; gene_id "Cuff.1057"; gene_name "Cuff.1057"; locus "RLOC_00005049";
chr12	Cufflinks_novel	exon	35560670	35560748	78	transcript_id "cuff_1057"; gene_id "Cuff.1057"; gene_name "Cuff.1057"; locus "RLOC_00005049";
chr12	Cufflinks_novel	exon	35726826	35726853	27	transcript_id "cuff_1058"; gene_id "Cuff.1058"; gene_name "Cuff.1058"; locus "RLOC_00005051";
chr12	Cufflinks_novel	exon	35728302	35728387	85	transcript_id "cuff_1058"; gene_id "Cuff.1058"; gene_name "Cuff.1058"; locus "RLOC_00005051";
chr12	Cufflinks_novel	exon	40767746	40767778	32	transcript_id "cuff_1059"; gene_id "Cuff.1059"; gene_name "Cuff.1059"; locus "RLOC_00005069";
chr12	Cufflinks_novel	exon	40768082	40768166	84	transcript_id "cuff_1059"; gene_id "Cuff.1059"; gene_name "Cuff.1059"; locus "RLOC_00005069";
chr12	Cufflinks_novel	exon	40767298	40767420	122	transcript_id "cuff_1059"; gene_id "Cuff.1059"; gene_name "Cuff.1059"; locus "RLOC_00005069";
chr12	Cufflinks_novel	exon	40768545	40768790	245	transcript_id "cuff_1059"; gene_id "Cuff.1059"; gene_name "Cuff.1059"; locus "RLOC_00005069";
chr12	Cufflinks_novel	exon	40766200	40766530	330	transcript_id "cuff_1059"; gene_id "Cuff.1059"; gene_name "Cuff.1059"; locus "RLOC_00005069";
chr12	Cufflinks_novel	exon	40766660	40766992	332	transcript_id "cuff_1059"; gene_id "Cuff.1059"; gene_name "Cuff.1059"; locus "RLOC_00005069";
chr1	Cufflinks_novel	exon	53559678	53559705	27	transcript_id "cuff_106"; gene_id "Cuff.106"; gene_name "Cuff.106"; locus "RLOC_00000331";
chr1	Cufflinks_novel	exon	53560331	53560889	558	transcript_id "cuff_106"; gene_id "Cuff.106"; gene_name "Cuff.106"; locus "RLOC_00000331";
chr1	Cufflinks_novel	exon	53558857	53559517	660	transcript_id "cuff_106"; gene_id "Cuff.106"; gene_name "Cuff.106"; locus "RLOC_00000331";
chr12	Cufflinks_novel	exon	40773089	40773124	35	transcript_id "cuff_1060"; gene_id "Cuff.1060"; gene_name "Cuff.1060"; locus "RLOC_00005070";
chr12	Cufflinks_novel	exon	40772960	40773019	59	transcript_id "cuff_1060"; gene_id "Cuff.1060"; gene_name "Cuff.1060"; locus "RLOC_00005070";
chr12	Cufflinks_novel	exon	40772225	40772833	608	transcript_id "cuff_1060"; gene_id "Cuff.1060"; gene_name "Cuff.1060"; locus "RLOC_00005070";
chr12	Cufflinks_novel	exon	40951094	40951121	27	transcript_id "cuff_1061"; gene_id "Cuff.1061"; gene_name "Cuff.1061"; locus "RLOC_00005075";
chr12	Cufflinks_novel	exon	40950426	40950534	108	transcript_id "cuff_1061"; gene_id "Cuff.1061"; gene_name "Cuff.1061"; locus "RLOC_00005075";
chr12	Cufflinks_novel	exon	40950072	40950236	164	transcript_id "cuff_1061"; gene_id "Cuff.1061"; gene_name "Cuff.1061"; locus "RLOC_00005075";
chr12	Cufflinks_novel	exon	40951208	40951607	399	transcript_id "cuff_1061"; gene_id "Cuff.1061"; gene_name "Cuff.1061"; locus "RLOC_00005075";
chr12	Cufflinks_novel	exon	43196610	43196720	110	transcript_id "cuff_1062"; gene_id "Cuff.1062"; gene_name "Cuff.1062"; locus "RLOC_00005080";
chr12	Cufflinks_novel	exon	43198156	43198322	166	transcript_id "cuff_1062"; gene_id "Cuff.1062"; gene_name "Cuff.1062"; locus "RLOC_00005080";
chr12	Cufflinks_novel	exon	43197312	43197581	269	transcript_id "cuff_1062"; gene_id "Cuff.1062"; gene_name "Cuff.1062"; locus "RLOC_00005080";
chr12	Cufflinks_novel	exon	43216165	43216192	27	transcript_id "cuff_1063"; gene_id "Cuff.1063"; gene_name "Cuff.1063"; locus "RLOC_00005081";
chr12	Cufflinks_novel	exon	43215530	43215673	143	transcript_id "cuff_1063"; gene_id "Cuff.1063"; gene_name "Cuff.1063"; locus "RLOC_00005081";
chr12	Cufflinks_novel	exon	53597742	53597769	27	transcript_id "cuff_1064"; gene_id "Cuff.1064"; gene_name "Cuff.1064"; locus "RLOC_00005100";
chr12	Cufflinks_novel	exon	53597427	53597505	78	transcript_id "cuff_1064"; gene_id "Cuff.1064"; gene_name "Cuff.1064"; locus "RLOC_00005100";
chr12	Cufflinks_novel	exon	53700657	53700762	105	transcript_id "cuff_1065"; gene_id "Cuff.1065"; gene_name "Cuff.1065"; locus "RLOC_00005102";
chr12	Cufflinks_novel	exon	53703076	53703314	238	transcript_id "cuff_1065"; gene_id "Cuff.1065"; gene_name "Cuff.1065"; locus "RLOC_00005102";
chr12	Cufflinks_novel	exon	53700961	53701360	399	transcript_id "cuff_1065"; gene_id "Cuff.1065"; gene_name "Cuff.1065"; locus "RLOC_00005102";
chr12	Cufflinks_novel	exon	53709530	53709642	112	transcript_id "cuff_1066"; gene_id "Cuff.1066"; gene_name "Cuff.1066"; locus "RLOC_00005103";
chr12	Cufflinks_novel	exon	53711281	53711439	158	transcript_id "cuff_1066"; gene_id "Cuff.1066"; gene_name "Cuff.1066"; locus "RLOC_00005103";
chr12	Cufflinks_novel	exon	53709108	53709275	167	transcript_id "cuff_1066"; gene_id "Cuff.1066"; gene_name "Cuff.1066"; locus "RLOC_00005103";
chr12	Cufflinks_novel	exon	53722584	53722659	75	transcript_id "cuff_1067"; gene_id "Cuff.1067"; gene_name "Cuff.1067"; locus "RLOC_00005104";
chr12	Cufflinks_novel	exon	53722795	53723112	317	transcript_id "cuff_1067"; gene_id "Cuff.1067"; gene_name "Cuff.1067"; locus "RLOC_00005104";
chr12	Cufflinks_novel	exon	53730418	53730445	27	transcript_id "cuff_1068"; gene_id "Cuff.1068"; gene_name "Cuff.1068"; locus "RLOC_00005105";
chr12	Cufflinks_novel	exon	53731861	53731899	38	transcript_id "cuff_1068"; gene_id "Cuff.1068"; gene_name "Cuff.1068"; locus "RLOC_00005105";
chr12	Cufflinks_novel	exon	53727903	53727992	89	transcript_id "cuff_1068"; gene_id "Cuff.1068"; gene_name "Cuff.1068"; locus "RLOC_00005105";
chr12	Cufflinks_novel	exon	53731580	53731785	205	transcript_id "cuff_1068"; gene_id "Cuff.1068"; gene_name "Cuff.1068"; locus "RLOC_00005105";
chr12	Cufflinks_novel	exon	53729541	53729849	308	transcript_id "cuff_1068"; gene_id "Cuff.1068"; gene_name "Cuff.1068"; locus "RLOC_00005105";
chr12	Cufflinks_novel	exon	53728359	53728687	328	transcript_id "cuff_1068"; gene_id "Cuff.1068"; gene_name "Cuff.1068"; locus "RLOC_00005105";
chr12	Cufflinks_novel	exon	54308165	54308192	27	transcript_id "cuff_1069"; gene_id "Cuff.1069"; gene_name "Cuff.1069"; locus "RLOC_00005107";
chr12	Cufflinks_novel	exon	54308330	54308504	174	transcript_id "cuff_1069"; gene_id "Cuff.1069"; gene_name "Cuff.1069"; locus "RLOC_00005107";
chr1	Cufflinks_novel	exon	53567162	53567196	34	transcript_id "cuff_107"; gene_id "Cuff.107"; gene_name "Cuff.107"; locus "RLOC_00000332";
chr1	Cufflinks_novel	exon	53566329	53566514	185	transcript_id "cuff_107"; gene_id "Cuff.107"; gene_name "Cuff.107"; locus "RLOC_00000332";
chr12	Cufflinks_novel	exon	55178684	55178712	28	transcript_id "cuff_1070"; gene_id "Cuff.1070"; gene_name "Cuff.1070"; locus "RLOC_00005109";
chr12	Cufflinks_novel	exon	55178273	55178340	67	transcript_id "cuff_1070"; gene_id "Cuff.1070"; gene_name "Cuff.1070"; locus "RLOC_00005109";
chr12	Cufflinks_novel	exon	55177147	55177288	141	transcript_id "cuff_1070"; gene_id "Cuff.1070"; gene_name "Cuff.1070"; locus "RLOC_00005109";
chr12	Cufflinks_novel	exon	55176732	55177066	334	transcript_id "cuff_1070"; gene_id "Cuff.1070"; gene_name "Cuff.1070"; locus "RLOC_00005109";
chr12	Cufflinks_novel	exon	55195781	55195908	127	transcript_id "cuff_1071"; gene_id "Cuff.1071"; gene_name "Cuff.1071"; locus "RLOC_00005110";
chr12	Cufflinks_novel	exon	55192510	55192679	169	transcript_id "cuff_1071"; gene_id "Cuff.1071"; gene_name "Cuff.1071"; locus "RLOC_00005110";
chr12	Cufflinks_novel	exon	55193901	55194121	220	transcript_id "cuff_1071"; gene_id "Cuff.1071"; gene_name "Cuff.1071"; locus "RLOC_00005110";
chr12	Cufflinks_novel	exon	55193514	55193814	300	transcript_id "cuff_1071"; gene_id "Cuff.1071"; gene_name "Cuff.1071"; locus "RLOC_00005110";
chr12	Cufflinks_novel	exon	55203675	55203727	52	transcript_id "cuff_1072"; gene_id "Cuff.1072"; gene_name "Cuff.1072"; locus "RLOC_00005111";
chr12	Cufflinks_novel	exon	55204102	55204209	107	transcript_id "cuff_1072"; gene_id "Cuff.1072"; gene_name "Cuff.1072"; locus "RLOC_00005111";
chr12	Cufflinks_novel	exon	55203063	55203190	127	transcript_id "cuff_1072"; gene_id "Cuff.1072"; gene_name "Cuff.1072"; locus "RLOC_00005111";
chr12	Cufflinks_novel	exon	55207339	55207366	27	transcript_id "cuff_1073"; gene_id "Cuff.1073"; gene_name "Cuff.1073"; locus "RLOC_00005112";
chr12	Cufflinks_novel	exon	55208062	55208146	84	transcript_id "cuff_1073"; gene_id "Cuff.1073"; gene_name "Cuff.1073"; locus "RLOC_00005112";
chr12	Cufflinks_novel	exon	55207555	55207665	110	transcript_id "cuff_1073"; gene_id "Cuff.1073"; gene_name "Cuff.1073"; locus "RLOC_00005112";
chr12	Cufflinks_novel	exon	55206784	55206916	132	transcript_id "cuff_1073"; gene_id "Cuff.1073"; gene_name "Cuff.1073"; locus "RLOC_00005112";
chr12	Cufflinks_novel	exon	55208250	55208397	147	transcript_id "cuff_1073"; gene_id "Cuff.1073"; gene_name "Cuff.1073"; locus "RLOC_00005112";
chr12	Cufflinks_novel	exon	55206408	55206622	214	transcript_id "cuff_1073"; gene_id "Cuff.1073"; gene_name "Cuff.1073"; locus "RLOC_00005112";
chr12	Cufflinks_novel	exon	55231464	55231491	27	transcript_id "cuff_1074"; gene_id "Cuff.1074"; gene_name "Cuff.1074"; locus "RLOC_00005113";
chr12	Cufflinks_novel	exon	55229764	55229919	155	transcript_id "cuff_1074"; gene_id "Cuff.1074"; gene_name "Cuff.1074"; locus "RLOC_00005113";
chr12	Cufflinks_novel	exon	55668068	55668095	27	transcript_id "cuff_1075"; gene_id "Cuff.1075"; gene_name "Cuff.1075"; locus "RLOC_00005116";
chr12	Cufflinks_novel	exon	55668472	55668499	27	transcript_id "cuff_1075"; gene_id "Cuff.1075"; gene_name "Cuff.1075"; locus "RLOC_00005116";
chr12	Cufflinks_novel	exon	56096105	56096132	27	transcript_id "cuff_1076"; gene_id "Cuff.1076"; gene_name "Cuff.1076"; locus "RLOC_00005122";
chr12	Cufflinks_novel	exon	56093017	56093192	175	transcript_id "cuff_1076"; gene_id "Cuff.1076"; gene_name "Cuff.1076"; locus "RLOC_00005122";
chr12	Cufflinks_novel	exon	56094710	56095037	327	transcript_id "cuff_1076"; gene_id "Cuff.1076"; gene_name "Cuff.1076"; locus "RLOC_00005122";
chr12	Cufflinks_novel	exon	56114985	56115118	133	transcript_id "cuff_1077"; gene_id "Cuff.1077"; gene_name "Cuff.1077"; locus "RLOC_00005123";
chr12	Cufflinks_novel	exon	56113483	56113638	155	transcript_id "cuff_1077"; gene_id "Cuff.1077"; gene_name "Cuff.1077"; locus "RLOC_00005123";
chr12	Cufflinks_novel	exon	56491985	56492033	48	transcript_id "cuff_1078"; gene_id "Cuff.1078"; gene_name "Cuff.1078"; locus "RLOC_00005131";
chr12	Cufflinks_novel	exon	56493314	56493401	87	transcript_id "cuff_1078"; gene_id "Cuff.1078"; gene_name "Cuff.1078"; locus "RLOC_00005131";
chr12	Cufflinks_novel	exon	56494915	56495021	106	transcript_id "cuff_1078"; gene_id "Cuff.1078"; gene_name "Cuff.1078"; locus "RLOC_00005131";
chr12	Cufflinks_novel	exon	56490451	56490566	115	transcript_id "cuff_1078"; gene_id "Cuff.1078"; gene_name "Cuff.1078"; locus "RLOC_00005131";
chr12	Cufflinks_novel	exon	56499325	56499352	27	transcript_id "cuff_1079"; gene_id "Cuff.1079"; gene_name "Cuff.1079"; locus "RLOC_00005132";
chr12	Cufflinks_novel	exon	56498267	56498353	86	transcript_id "cuff_1079"; gene_id "Cuff.1079"; gene_name "Cuff.1079"; locus "RLOC_00005132";
chr1	Cufflinks_novel	exon	53587150	53587230	80	transcript_id "cuff_108"; gene_id "Cuff.108"; gene_name "Cuff.108"; locus "RLOC_00000333";
chr1	Cufflinks_novel	exon	53588149	53588282	133	transcript_id "cuff_108"; gene_id "Cuff.108"; gene_name "Cuff.108"; locus "RLOC_00000333";
chr1	Cufflinks_novel	exon	53588970	53589164	194	transcript_id "cuff_108"; gene_id "Cuff.108"; gene_name "Cuff.108"; locus "RLOC_00000333";
chr1	Cufflinks_novel	exon	53590044	53590506	462	transcript_id "cuff_108"; gene_id "Cuff.108"; gene_name "Cuff.108"; locus "RLOC_00000333";
chr12	Cufflinks_novel	exon	57366959	57366986	27	transcript_id "cuff_1080"; gene_id "Cuff.1080"; gene_name "Cuff.1080"; locus "RLOC_00005139";
chr12	Cufflinks_novel	exon	57367140	57367167	27	transcript_id "cuff_1080"; gene_id "Cuff.1080"; gene_name "Cuff.1080"; locus "RLOC_00005139";
chr12	Cufflinks_novel	exon	57366449	57366485	36	transcript_id "cuff_1080"; gene_id "Cuff.1080"; gene_name "Cuff.1080"; locus "RLOC_00005139";
chr12	Cufflinks_novel	exon	57366661	57366748	87	transcript_id "cuff_1080"; gene_id "Cuff.1080"; gene_name "Cuff.1080"; locus "RLOC_00005139";
chr12	Cufflinks_novel	exon	58726655	58726830	175	transcript_id "cuff_1081"; gene_id "Cuff.1081"; gene_name "Cuff.1081"; locus "RLOC_00005148";
chr12	Cufflinks_novel	exon	58726396	58726573	177	transcript_id "cuff_1081"; gene_id "Cuff.1081"; gene_name "Cuff.1081"; locus "RLOC_00005148";
chr12	Cufflinks_novel	exon	58727617	58727927	310	transcript_id "cuff_1081"; gene_id "Cuff.1081"; gene_name "Cuff.1081"; locus "RLOC_00005148";
chr12	Cufflinks_novel	exon	58744023	58744158	135	transcript_id "cuff_1082"; gene_id "Cuff.1082"; gene_name "Cuff.1082"; locus "RLOC_00005149";
chr12	Cufflinks_novel	exon	58742280	58742474	194	transcript_id "cuff_1082"; gene_id "Cuff.1082"; gene_name "Cuff.1082"; locus "RLOC_00005149";
chr12	Cufflinks_novel	exon	58741229	58741451	222	transcript_id "cuff_1082"; gene_id "Cuff.1082"; gene_name "Cuff.1082"; locus "RLOC_00005149";
chr12	Cufflinks_novel	exon	58750588	58750615	27	transcript_id "cuff_1083"; gene_id "Cuff.1083"; gene_name "Cuff.1083"; locus "RLOC_00005150";
chr12	Cufflinks_novel	exon	58750419	58750509	90	transcript_id "cuff_1083"; gene_id "Cuff.1083"; gene_name "Cuff.1083"; locus "RLOC_00005150";
chr12	Cufflinks_novel	exon	58775575	58775782	207	transcript_id "cuff_1084"; gene_id "Cuff.1084"; gene_name "Cuff.1084"; locus "RLOC_00005151";
chr12	Cufflinks_novel	exon	58773913	58774368	455	transcript_id "cuff_1084"; gene_id "Cuff.1084"; gene_name "Cuff.1084"; locus "RLOC_00005151";
chr12	Cufflinks_novel	exon	58797934	58797982	48	transcript_id "cuff_1085"; gene_id "Cuff.1085"; gene_name "Cuff.1085"; locus "RLOC_00005152";
chr12	Cufflinks_novel	exon	58798348	58798496	148	transcript_id "cuff_1085"; gene_id "Cuff.1085"; gene_name "Cuff.1085"; locus "RLOC_00005152";
chr12	Cufflinks_novel	exon	58805420	58805507	87	transcript_id "cuff_1086"; gene_id "Cuff.1086"; gene_name "Cuff.1086"; locus "RLOC_00005153";
chr12	Cufflinks_novel	exon	58807798	58807952	154	transcript_id "cuff_1086"; gene_id "Cuff.1086"; gene_name "Cuff.1086"; locus "RLOC_00005153";
chr12	Cufflinks_novel	exon	58806530	58806758	228	transcript_id "cuff_1086"; gene_id "Cuff.1086"; gene_name "Cuff.1086"; locus "RLOC_00005153";
chr12	Cufflinks_novel	exon	58830549	58830576	27	transcript_id "cuff_1087"; gene_id "Cuff.1087"; gene_name "Cuff.1087"; locus "RLOC_00005154";
chr12	Cufflinks_novel	exon	58829405	58829538	133	transcript_id "cuff_1087"; gene_id "Cuff.1087"; gene_name "Cuff.1087"; locus "RLOC_00005154";
chr12	Cufflinks_novel	exon	58830322	58830469	147	transcript_id "cuff_1087"; gene_id "Cuff.1087"; gene_name "Cuff.1087"; locus "RLOC_00005154";
chr12	Cufflinks_novel	exon	59052259	59052286	27	transcript_id "cuff_1088"; gene_id "Cuff.1088"; gene_name "Cuff.1088"; locus "RLOC_00005155";
chr12	Cufflinks_novel	exon	59052447	59052510	63	transcript_id "cuff_1088"; gene_id "Cuff.1088"; gene_name "Cuff.1088"; locus "RLOC_00005155";
chr12	Cufflinks_novel	exon	59915679	59916213	534	transcript_id "cuff_1089"; gene_id "Cuff.1089"; gene_name "Cuff.1089"; locus "RLOC_00005158";
chr12	Cufflinks_novel	exon	59914869	59915597	728	transcript_id "cuff_1089"; gene_id "Cuff.1089"; gene_name "Cuff.1089"; locus "RLOC_00005158";
chr1	Cufflinks_novel	exon	53606008	53606130	122	transcript_id "cuff_109"; gene_id "Cuff.109"; gene_name "Cuff.109"; locus "RLOC_00000334";
chr1	Cufflinks_novel	exon	53604037	53604235	198	transcript_id "cuff_109"; gene_id "Cuff.109"; gene_name "Cuff.109"; locus "RLOC_00000334";
chr12	Cufflinks_novel	exon	63788789	63789299	510	transcript_id "cuff_1090"; gene_id "Cuff.1090"; gene_name "Cuff.1090"; locus "RLOC_00005167";
chr12	Cufflinks_novel	exon	67369476	67369548	72	transcript_id "cuff_1091"; gene_id "Cuff.1091"; gene_name "Cuff.1091"; locus "RLOC_00005177";
chr12	Cufflinks_novel	exon	67370111	67370193	82	transcript_id "cuff_1091"; gene_id "Cuff.1091"; gene_name "Cuff.1091"; locus "RLOC_00005177";
chr12	Cufflinks_novel	exon	72014284	72014311	27	transcript_id "cuff_1092"; gene_id "Cuff.1092"; gene_name "Cuff.1092"; locus "RLOC_00005208";
chr12	Cufflinks_novel	exon	72014983	72015010	27	transcript_id "cuff_1092"; gene_id "Cuff.1092"; gene_name "Cuff.1092"; locus "RLOC_00005208";
chr12	Cufflinks_novel	exon	72014702	72014769	67	transcript_id "cuff_1092"; gene_id "Cuff.1092"; gene_name "Cuff.1092"; locus "RLOC_00005208";
chr12	Cufflinks_novel	exon	72013841	72013919	78	transcript_id "cuff_1092"; gene_id "Cuff.1092"; gene_name "Cuff.1092"; locus "RLOC_00005208";
chr12	Cufflinks_novel	exon	72013644	72013747	103	transcript_id "cuff_1092"; gene_id "Cuff.1092"; gene_name "Cuff.1092"; locus "RLOC_00005208";
chr12	Cufflinks_novel	exon	72014029	72014195	166	transcript_id "cuff_1092"; gene_id "Cuff.1092"; gene_name "Cuff.1092"; locus "RLOC_00005208";
chr12	Cufflinks_novel	exon	72012773	72013088	315	transcript_id "cuff_1092"; gene_id "Cuff.1092"; gene_name "Cuff.1092"; locus "RLOC_00005208";
chr12	Cufflinks_novel	exon	72110845	72110953	108	transcript_id "cuff_1093"; gene_id "Cuff.1093"; gene_name "Cuff.1093"; locus "RLOC_00005211";
chr12	Cufflinks_novel	exon	72108867	72109055	188	transcript_id "cuff_1093"; gene_id "Cuff.1093"; gene_name "Cuff.1093"; locus "RLOC_00005211";
chr12	Cufflinks_novel	exon	72453193	72453220	27	transcript_id "cuff_1094"; gene_id "Cuff.1094"; gene_name "Cuff.1094"; locus "RLOC_00005217";
chr12	Cufflinks_novel	exon	72454138	72454247	109	transcript_id "cuff_1094"; gene_id "Cuff.1094"; gene_name "Cuff.1094"; locus "RLOC_00005217";
chr12	Cufflinks_novel	exon	72485048	72485067	19	transcript_id "cuff_1095"; gene_id "Cuff.1095"; gene_name "Cuff.1095"; locus "RLOC_00005218";
chr12	Cufflinks_novel	exon	72484612	72484687	75	transcript_id "cuff_1095"; gene_id "Cuff.1095"; gene_name "Cuff.1095"; locus "RLOC_00005218";
chr12	Cufflinks_novel	exon	72537649	72537676	27	transcript_id "cuff_1096"; gene_id "Cuff.1096"; gene_name "Cuff.1096"; locus "RLOC_00005219";
chr12	Cufflinks_novel	exon	72538074	72538128	54	transcript_id "cuff_1096"; gene_id "Cuff.1096"; gene_name "Cuff.1096"; locus "RLOC_00005219";
chr12	Cufflinks_novel	exon	72639913	72639975	62	transcript_id "cuff_1097"; gene_id "Cuff.1097"; gene_name "Cuff.1097"; locus "RLOC_00005220";
chr12	Cufflinks_novel	exon	72638860	72638924	64	transcript_id "cuff_1097"; gene_id "Cuff.1097"; gene_name "Cuff.1097"; locus "RLOC_00005220";
chr12	Cufflinks_novel	exon	72639005	72639075	70	transcript_id "cuff_1097"; gene_id "Cuff.1097"; gene_name "Cuff.1097"; locus "RLOC_00005220";
chr12	Cufflinks_novel	exon	72928972	72928999	27	transcript_id "cuff_1098"; gene_id "Cuff.1098"; gene_name "Cuff.1098"; locus "RLOC_00005221";
chr12	Cufflinks_novel	exon	72929616	72929643	27	transcript_id "cuff_1098"; gene_id "Cuff.1098"; gene_name "Cuff.1098"; locus "RLOC_00005221";
chr12	Cufflinks_novel	exon	72929708	72929735	27	transcript_id "cuff_1098"; gene_id "Cuff.1098"; gene_name "Cuff.1098"; locus "RLOC_00005221";
chr12	Cufflinks_novel	exon	72931345	72931410	65	transcript_id "cuff_1098"; gene_id "Cuff.1098"; gene_name "Cuff.1098"; locus "RLOC_00005221";
chr12	Cufflinks_novel	exon	72929410	72929488	78	transcript_id "cuff_1098"; gene_id "Cuff.1098"; gene_name "Cuff.1098"; locus "RLOC_00005221";
chr12	Cufflinks_novel	exon	73615458	73616210	752	transcript_id "cuff_1099"; gene_id "Cuff.1099"; gene_name "Cuff.1099"; locus "RLOC_00005229";
chr1	Cufflinks_novel	exon	11319548	11319579	31	transcript_id "cuff_11"; gene_id "Cuff.11"; gene_name "Cuff.11"; locus "RLOC_00000042";
chr1	Cufflinks_novel	exon	11318941	11319370	429	transcript_id "cuff_11"; gene_id "Cuff.11"; gene_name "Cuff.11"; locus "RLOC_00000042";
chr1	Cufflinks_novel	exon	53614531	53614611	80	transcript_id "cuff_110"; gene_id "Cuff.110"; gene_name "Cuff.110"; locus "RLOC_00000335";
chr1	Cufflinks_novel	exon	53614276	53614378	102	transcript_id "cuff_110"; gene_id "Cuff.110"; gene_name "Cuff.110"; locus "RLOC_00000335";
chr12	Cufflinks_novel	exon	73861332	73861361	29	transcript_id "cuff_1100"; gene_id "Cuff.1100"; gene_name "Cuff.1100"; locus "RLOC_00005232";
chr12	Cufflinks_novel	exon	73859678	73859770	92	transcript_id "cuff_1100"; gene_id "Cuff.1100"; gene_name "Cuff.1100"; locus "RLOC_00005232";
chr12	Cufflinks_novel	exon	73856784	73856892	108	transcript_id "cuff_1100"; gene_id "Cuff.1100"; gene_name "Cuff.1100"; locus "RLOC_00005232";
chr12	Cufflinks_novel	exon	73860895	73861145	250	transcript_id "cuff_1100"; gene_id "Cuff.1100"; gene_name "Cuff.1100"; locus "RLOC_00005232";
chr12	Cufflinks_novel	exon	73858379	73858815	436	transcript_id "cuff_1100"; gene_id "Cuff.1100"; gene_name "Cuff.1100"; locus "RLOC_00005232";
chr12	Cufflinks_novel	exon	73901977	73902510	533	transcript_id "cuff_1101"; gene_id "Cuff.1101"; gene_name "Cuff.1101"; locus "RLOC_00005234";
chr12	Cufflinks_novel	exon	73922563	73922590	27	transcript_id "cuff_1102"; gene_id "Cuff.1102"; gene_name "Cuff.1102"; locus "RLOC_00005235";
chr12	Cufflinks_novel	exon	73922081	73922111	30	transcript_id "cuff_1102"; gene_id "Cuff.1102"; gene_name "Cuff.1102"; locus "RLOC_00005235";
chr12	Cufflinks_novel	exon	77505054	77505083	29	transcript_id "cuff_1103"; gene_id "Cuff.1103"; gene_name "Cuff.1103"; locus "RLOC_00005263";
chr12	Cufflinks_novel	exon	77503818	77503880	62	transcript_id "cuff_1103"; gene_id "Cuff.1103"; gene_name "Cuff.1103"; locus "RLOC_00005263";
chr12	Cufflinks_novel	exon	77504263	77504525	262	transcript_id "cuff_1103"; gene_id "Cuff.1103"; gene_name "Cuff.1103"; locus "RLOC_00005263";
chr12	Cufflinks_novel	exon	79298338	79298421	83	transcript_id "cuff_1104"; gene_id "Cuff.1104"; gene_name "Cuff.1104"; locus "RLOC_00005275";
chr12	Cufflinks_novel	exon	79299632	79299739	107	transcript_id "cuff_1104"; gene_id "Cuff.1104"; gene_name "Cuff.1104"; locus "RLOC_00005275";
chr12	Cufflinks_novel	exon	79297972	79298187	215	transcript_id "cuff_1104"; gene_id "Cuff.1104"; gene_name "Cuff.1104"; locus "RLOC_00005275";
chr12	Cufflinks_novel	exon	79302752	79302781	29	transcript_id "cuff_1105"; gene_id "Cuff.1105"; gene_name "Cuff.1105"; locus "RLOC_00005276";
chr12	Cufflinks_novel	exon	79303240	79303306	66	transcript_id "cuff_1105"; gene_id "Cuff.1105"; gene_name "Cuff.1105"; locus "RLOC_00005276";
chr12	Cufflinks_novel	exon	79302209	79302335	126	transcript_id "cuff_1105"; gene_id "Cuff.1105"; gene_name "Cuff.1105"; locus "RLOC_00005276";
chr12	Cufflinks_novel	exon	79301951	79302097	146	transcript_id "cuff_1105"; gene_id "Cuff.1105"; gene_name "Cuff.1105"; locus "RLOC_00005276";
chr12	Cufflinks_novel	exon	79309461	79309529	68	transcript_id "cuff_1106"; gene_id "Cuff.1106"; gene_name "Cuff.1106"; locus "RLOC_00005277";
chr12	Cufflinks_novel	exon	79310205	79310275	70	transcript_id "cuff_1106"; gene_id "Cuff.1106"; gene_name "Cuff.1106"; locus "RLOC_00005277";
chr12	Cufflinks_novel	exon	79309811	79309974	163	transcript_id "cuff_1106"; gene_id "Cuff.1106"; gene_name "Cuff.1106"; locus "RLOC_00005277";
chr12	Cufflinks_novel	exon	79307806	79307980	174	transcript_id "cuff_1106"; gene_id "Cuff.1106"; gene_name "Cuff.1106"; locus "RLOC_00005277";
chr12	Cufflinks_novel	exon	79847684	79847711	27	transcript_id "cuff_1107"; gene_id "Cuff.1107"; gene_name "Cuff.1107"; locus "RLOC_00005280";
chr12	Cufflinks_novel	exon	79849271	79849367	96	transcript_id "cuff_1107"; gene_id "Cuff.1107"; gene_name "Cuff.1107"; locus "RLOC_00005280";
chr12	Cufflinks_novel	exon	80293175	80293212	37	transcript_id "cuff_1108"; gene_id "Cuff.1108"; gene_name "Cuff.1108"; locus "RLOC_00005291";
chr12	Cufflinks_novel	exon	80292951	80293118	167	transcript_id "cuff_1108"; gene_id "Cuff.1108"; gene_name "Cuff.1108"; locus "RLOC_00005291";
chr12	Cufflinks_novel	exon	80964317	80964344	27	transcript_id "cuff_1109"; gene_id "Cuff.1109"; gene_name "Cuff.1109"; locus "RLOC_00005295";
chr12	Cufflinks_novel	exon	80965178	80965212	34	transcript_id "cuff_1109"; gene_id "Cuff.1109"; gene_name "Cuff.1109"; locus "RLOC_00005295";
chr12	Cufflinks_novel	exon	80965896	80966072	176	transcript_id "cuff_1109"; gene_id "Cuff.1109"; gene_name "Cuff.1109"; locus "RLOC_00005295";
chr12	Cufflinks_novel	exon	80965338	80965595	257	transcript_id "cuff_1109"; gene_id "Cuff.1109"; gene_name "Cuff.1109"; locus "RLOC_00005295";
chr1	Cufflinks_novel	exon	53632034	53632061	27	transcript_id "cuff_111"; gene_id "Cuff.111"; gene_name "Cuff.111"; locus "RLOC_00000336";
chr1	Cufflinks_novel	exon	53629144	53629247	103	transcript_id "cuff_111"; gene_id "Cuff.111"; gene_name "Cuff.111"; locus "RLOC_00000336";
chr1	Cufflinks_novel	exon	53634043	53634154	111	transcript_id "cuff_111"; gene_id "Cuff.111"; gene_name "Cuff.111"; locus "RLOC_00000336";
chr1	Cufflinks_novel	exon	53630490	53630653	163	transcript_id "cuff_111"; gene_id "Cuff.111"; gene_name "Cuff.111"; locus "RLOC_00000336";
chr12	Cufflinks_novel	exon	80977378	80977438	60	transcript_id "cuff_1110"; gene_id "Cuff.1110"; gene_name "Cuff.1110"; locus "RLOC_00005296";
chr12	Cufflinks_novel	exon	80976185	80976288	103	transcript_id "cuff_1110"; gene_id "Cuff.1110"; gene_name "Cuff.1110"; locus "RLOC_00005296";
chr12	Cufflinks_novel	exon	80975653	80975923	270	transcript_id "cuff_1110"; gene_id "Cuff.1110"; gene_name "Cuff.1110"; locus "RLOC_00005296";
chr12	Cufflinks_novel	exon	81037396	81037423	27	transcript_id "cuff_1111"; gene_id "Cuff.1111"; gene_name "Cuff.1111"; locus "RLOC_00005297";
chr12	Cufflinks_novel	exon	81039037	81039064	27	transcript_id "cuff_1111"; gene_id "Cuff.1111"; gene_name "Cuff.1111"; locus "RLOC_00005297";
chr12	Cufflinks_novel	exon	81038423	81038451	28	transcript_id "cuff_1111"; gene_id "Cuff.1111"; gene_name "Cuff.1111"; locus "RLOC_00005297";
chr12	Cufflinks_novel	exon	81033914	81033956	42	transcript_id "cuff_1111"; gene_id "Cuff.1111"; gene_name "Cuff.1111"; locus "RLOC_00005297";
chr12	Cufflinks_novel	exon	81035309	81035561	252	transcript_id "cuff_1111"; gene_id "Cuff.1111"; gene_name "Cuff.1111"; locus "RLOC_00005297";
chr12	Cufflinks_novel	exon	81047308	81047326	18	transcript_id "cuff_1112"; gene_id "Cuff.1112"; gene_name "Cuff.1112"; locus "RLOC_00005298";
chr12	Cufflinks_novel	exon	81046722	81046749	27	transcript_id "cuff_1112"; gene_id "Cuff.1112"; gene_name "Cuff.1112"; locus "RLOC_00005298";
chr12	Cufflinks_novel	exon	82044037	82044108	71	transcript_id "cuff_1113"; gene_id "Cuff.1113"; gene_name "Cuff.1113"; locus "RLOC_00005312";
chr12	Cufflinks_novel	exon	82043794	82043891	97	transcript_id "cuff_1113"; gene_id "Cuff.1113"; gene_name "Cuff.1113"; locus "RLOC_00005312";
chr12	Cufflinks_novel	exon	82514488	82514634	146	transcript_id "cuff_1114"; gene_id "Cuff.1114"; gene_name "Cuff.1114"; locus "RLOC_00005319";
chr12	Cufflinks_novel	exon	82514067	82514227	160	transcript_id "cuff_1114"; gene_id "Cuff.1114"; gene_name "Cuff.1114"; locus "RLOC_00005319";
chr12	Cufflinks_novel	exon	83595449	83595484	35	transcript_id "cuff_1115"; gene_id "Cuff.1115"; gene_name "Cuff.1115"; locus "RLOC_00005329";
chr12	Cufflinks_novel	exon	83593890	83594095	205	transcript_id "cuff_1115"; gene_id "Cuff.1115"; gene_name "Cuff.1115"; locus "RLOC_00005329";
chr12	Cufflinks_novel	exon	83597127	83597335	208	transcript_id "cuff_1115"; gene_id "Cuff.1115"; gene_name "Cuff.1115"; locus "RLOC_00005329";
chr12	Cufflinks_novel	exon	85028162	85028189	27	transcript_id "cuff_1116"; gene_id "Cuff.1116"; gene_name "Cuff.1116"; locus "RLOC_00005335";
chr12	Cufflinks_novel	exon	85029203	85029230	27	transcript_id "cuff_1116"; gene_id "Cuff.1116"; gene_name "Cuff.1116"; locus "RLOC_00005335";
chr12	Cufflinks_novel	exon	85286196	85286339	143	transcript_id "cuff_1117"; gene_id "Cuff.1117"; gene_name "Cuff.1117"; locus "RLOC_00005339";
chr12	Cufflinks_novel	exon	85286390	85286551	161	transcript_id "cuff_1117"; gene_id "Cuff.1117"; gene_name "Cuff.1117"; locus "RLOC_00005339";
chr12	Cufflinks_novel	exon	85296602	85296629	27	transcript_id "cuff_1118"; gene_id "Cuff.1118"; gene_name "Cuff.1118"; locus "RLOC_00005341";
chr12	Cufflinks_novel	exon	85297689	85297766	77	transcript_id "cuff_1118"; gene_id "Cuff.1118"; gene_name "Cuff.1118"; locus "RLOC_00005341";
chr12	Cufflinks_novel	exon	85299397	85299498	101	transcript_id "cuff_1118"; gene_id "Cuff.1118"; gene_name "Cuff.1118"; locus "RLOC_00005341";
chr12	Cufflinks_novel	exon	85295979	85296099	120	transcript_id "cuff_1118"; gene_id "Cuff.1118"; gene_name "Cuff.1118"; locus "RLOC_00005341";
chr12	Cufflinks_novel	exon	85321393	85321483	90	transcript_id "cuff_1119"; gene_id "Cuff.1119"; gene_name "Cuff.1119"; locus "RLOC_00005342";
chr12	Cufflinks_novel	exon	85317613	85317750	137	transcript_id "cuff_1119"; gene_id "Cuff.1119"; gene_name "Cuff.1119"; locus "RLOC_00005342";
chr12	Cufflinks_novel	exon	85315948	85316095	147	transcript_id "cuff_1119"; gene_id "Cuff.1119"; gene_name "Cuff.1119"; locus "RLOC_00005342";
chr12	Cufflinks_novel	exon	85314541	85314707	166	transcript_id "cuff_1119"; gene_id "Cuff.1119"; gene_name "Cuff.1119"; locus "RLOC_00005342";
chr12	Cufflinks_novel	exon	85318883	85319086	203	transcript_id "cuff_1119"; gene_id "Cuff.1119"; gene_name "Cuff.1119"; locus "RLOC_00005342";
chr12	Cufflinks_novel	exon	85320745	85321299	554	transcript_id "cuff_1119"; gene_id "Cuff.1119"; gene_name "Cuff.1119"; locus "RLOC_00005342";
chr1	Cufflinks_novel	exon	53648959	53649075	116	transcript_id "cuff_112"; gene_id "Cuff.112"; gene_name "Cuff.112"; locus "RLOC_00000337";
chr1	Cufflinks_novel	exon	53648411	53648631	220	transcript_id "cuff_112"; gene_id "Cuff.112"; gene_name "Cuff.112"; locus "RLOC_00000337";
chr12	Cufflinks_novel	exon	86414196	86414290	94	transcript_id "cuff_1120"; gene_id "Cuff.1120"; gene_name "Cuff.1120"; locus "RLOC_00005372";
chr12	Cufflinks_novel	exon	86413904	86414142	238	transcript_id "cuff_1120"; gene_id "Cuff.1120"; gene_name "Cuff.1120"; locus "RLOC_00005372";
chr12	Cufflinks_novel	exon	86415933	86416237	304	transcript_id "cuff_1120"; gene_id "Cuff.1120"; gene_name "Cuff.1120"; locus "RLOC_00005372";
chr12	Cufflinks_novel	exon	86414918	86415281	363	transcript_id "cuff_1120"; gene_id "Cuff.1120"; gene_name "Cuff.1120"; locus "RLOC_00005372";
chr12	Cufflinks_novel	exon	86423189	86423315	126	transcript_id "cuff_1121"; gene_id "Cuff.1121"; gene_name "Cuff.1121"; locus "RLOC_00005373";
chr12	Cufflinks_novel	exon	86421237	86421449	212	transcript_id "cuff_1121"; gene_id "Cuff.1121"; gene_name "Cuff.1121"; locus "RLOC_00005373";
chr12	Cufflinks_novel	exon	86424863	86425098	235	transcript_id "cuff_1121"; gene_id "Cuff.1121"; gene_name "Cuff.1121"; locus "RLOC_00005373";
chr12	Cufflinks_novel	exon	86423435	86423695	260	transcript_id "cuff_1121"; gene_id "Cuff.1121"; gene_name "Cuff.1121"; locus "RLOC_00005373";
chr12	Cufflinks_novel	exon	86627590	86627695	105	transcript_id "cuff_1122"; gene_id "Cuff.1122"; gene_name "Cuff.1122"; locus "RLOC_00005381";
chr12	Cufflinks_novel	exon	86628342	86628479	137	transcript_id "cuff_1122"; gene_id "Cuff.1122"; gene_name "Cuff.1122"; locus "RLOC_00005381";
chr12	Cufflinks_novel	exon	86718165	86718192	27	transcript_id "cuff_1123"; gene_id "Cuff.1123"; gene_name "Cuff.1123"; locus "RLOC_00005385";
chr12	Cufflinks_novel	exon	86716858	86716888	30	transcript_id "cuff_1123"; gene_id "Cuff.1123"; gene_name "Cuff.1123"; locus "RLOC_00005385";
chr12	Cufflinks_novel	exon	86716076	86716211	135	transcript_id "cuff_1123"; gene_id "Cuff.1123"; gene_name "Cuff.1123"; locus "RLOC_00005385";
chr12	Cufflinks_novel	exon	86879247	86879274	27	transcript_id "cuff_1124"; gene_id "Cuff.1124"; gene_name "Cuff.1124"; locus "RLOC_00005387";
chr12	Cufflinks_novel	exon	86879400	86879522	122	transcript_id "cuff_1124"; gene_id "Cuff.1124"; gene_name "Cuff.1124"; locus "RLOC_00005387";
chr12	Cufflinks_novel	exon	87081793	87081820	27	transcript_id "cuff_1125"; gene_id "Cuff.1125"; gene_name "Cuff.1125"; locus "RLOC_00005390";
chr12	Cufflinks_novel	exon	87079842	87079871	29	transcript_id "cuff_1125"; gene_id "Cuff.1125"; gene_name "Cuff.1125"; locus "RLOC_00005390";
chr12	Cufflinks_novel	exon	87079932	87080035	103	transcript_id "cuff_1125"; gene_id "Cuff.1125"; gene_name "Cuff.1125"; locus "RLOC_00005390";
chr12	Cufflinks_novel	exon	87084070	87084173	103	transcript_id "cuff_1125"; gene_id "Cuff.1125"; gene_name "Cuff.1125"; locus "RLOC_00005390";
chr12	Cufflinks_novel	exon	87079197	87079330	133	transcript_id "cuff_1125"; gene_id "Cuff.1125"; gene_name "Cuff.1125"; locus "RLOC_00005390";
chr12	Cufflinks_novel	exon	87080225	87080391	166	transcript_id "cuff_1125"; gene_id "Cuff.1125"; gene_name "Cuff.1125"; locus "RLOC_00005390";
chr12	Cufflinks_novel	exon	87083495	87083696	201	transcript_id "cuff_1125"; gene_id "Cuff.1125"; gene_name "Cuff.1125"; locus "RLOC_00005390";
chr12	Cufflinks_novel	exon	87083225	87083441	216	transcript_id "cuff_1125"; gene_id "Cuff.1125"; gene_name "Cuff.1125"; locus "RLOC_00005390";
chr12	Cufflinks_novel	exon	87081223	87081441	218	transcript_id "cuff_1125"; gene_id "Cuff.1125"; gene_name "Cuff.1125"; locus "RLOC_00005390";
chr12	Cufflinks_novel	exon	87084377	87084699	322	transcript_id "cuff_1125"; gene_id "Cuff.1125"; gene_name "Cuff.1125"; locus "RLOC_00005390";
chr12	Cufflinks_novel	exon	88068959	88069053	94	transcript_id "cuff_1126"; gene_id "Cuff.1126"; gene_name "Cuff.1126"; locus "RLOC_00005400";
chr12	Cufflinks_novel	exon	88069108	88069220	112	transcript_id "cuff_1126"; gene_id "Cuff.1126"; gene_name "Cuff.1126"; locus "RLOC_00005400";
chr12	Cufflinks_novel	exon	88072093	88072220	127	transcript_id "cuff_1127"; gene_id "Cuff.1127"; gene_name "Cuff.1127"; locus "RLOC_00005401";
chr12	Cufflinks_novel	exon	88073909	88074052	143	transcript_id "cuff_1127"; gene_id "Cuff.1127"; gene_name "Cuff.1127"; locus "RLOC_00005401";
chr12	Cufflinks_novel	exon	88071250	88071503	253	transcript_id "cuff_1127"; gene_id "Cuff.1127"; gene_name "Cuff.1127"; locus "RLOC_00005401";
chr12	Cufflinks_novel	exon	88074606	88075158	552	transcript_id "cuff_1127"; gene_id "Cuff.1127"; gene_name "Cuff.1127"; locus "RLOC_00005401";
chr12	Cufflinks_novel	exon	88543832	88543877	45	transcript_id "cuff_1128"; gene_id "Cuff.1128"; gene_name "Cuff.1128"; locus "RLOC_00005411";
chr12	Cufflinks_novel	exon	88543128	88543186	58	transcript_id "cuff_1128"; gene_id "Cuff.1128"; gene_name "Cuff.1128"; locus "RLOC_00005411";
chr12	Cufflinks_novel	exon	88543985	88544085	100	transcript_id "cuff_1128"; gene_id "Cuff.1128"; gene_name "Cuff.1128"; locus "RLOC_00005411";
chr12	Cufflinks_novel	exon	88541276	88541503	227	transcript_id "cuff_1128"; gene_id "Cuff.1128"; gene_name "Cuff.1128"; locus "RLOC_00005411";
chr12	Cufflinks_novel	exon	88541557	88542180	623	transcript_id "cuff_1128"; gene_id "Cuff.1128"; gene_name "Cuff.1128"; locus "RLOC_00005411";
chr12	Cufflinks_novel	exon	88542237	88542997	760	transcript_id "cuff_1128"; gene_id "Cuff.1128"; gene_name "Cuff.1128"; locus "RLOC_00005411";
chr12	Cufflinks_novel	exon	88548900	88548945	45	transcript_id "cuff_1129"; gene_id "Cuff.1129"; gene_name "Cuff.1129"; locus "RLOC_00005412";
chr12	Cufflinks_novel	exon	88549625	88549897	272	transcript_id "cuff_1129"; gene_id "Cuff.1129"; gene_name "Cuff.1129"; locus "RLOC_00005412";
chr1	Cufflinks_novel	exon	53651643	53651670	27	transcript_id "cuff_113"; gene_id "Cuff.113"; gene_name "Cuff.113"; locus "RLOC_00000338";
chr1	Cufflinks_novel	exon	53655487	53655516	29	transcript_id "cuff_113"; gene_id "Cuff.113"; gene_name "Cuff.113"; locus "RLOC_00000338";
chr1	Cufflinks_novel	exon	53652895	53653098	203	transcript_id "cuff_113"; gene_id "Cuff.113"; gene_name "Cuff.113"; locus "RLOC_00000338";
chr1	Cufflinks_novel	exon	53653788	53654075	287	transcript_id "cuff_113"; gene_id "Cuff.113"; gene_name "Cuff.113"; locus "RLOC_00000338";
chr1	Cufflinks_novel	exon	53654146	53654466	320	transcript_id "cuff_113"; gene_id "Cuff.113"; gene_name "Cuff.113"; locus "RLOC_00000338";
chr12	Cufflinks_novel	exon	89869156	89869226	70	transcript_id "cuff_1130"; gene_id "Cuff.1130"; gene_name "Cuff.1130"; locus "RLOC_00005436";
chr12	Cufflinks_novel	exon	89870718	89870888	170	transcript_id "cuff_1130"; gene_id "Cuff.1130"; gene_name "Cuff.1130"; locus "RLOC_00005436";
chr12	Cufflinks_novel	exon	89876404	89876501	97	transcript_id "cuff_1131"; gene_id "Cuff.1131"; gene_name "Cuff.1131"; locus "RLOC_00005437";
chr12	Cufflinks_novel	exon	89877650	89877817	167	transcript_id "cuff_1131"; gene_id "Cuff.1131"; gene_name "Cuff.1131"; locus "RLOC_00005437";
chr12	Cufflinks_novel	exon	89880171	89880360	189	transcript_id "cuff_1131"; gene_id "Cuff.1131"; gene_name "Cuff.1131"; locus "RLOC_00005437";
chr12	Cufflinks_novel	exon	89878794	89879010	216	transcript_id "cuff_1131"; gene_id "Cuff.1131"; gene_name "Cuff.1131"; locus "RLOC_00005437";
chr12	Cufflinks_novel	exon	89919749	89919843	94	transcript_id "cuff_1132"; gene_id "Cuff.1132"; gene_name "Cuff.1132"; locus "RLOC_00005438";
chr12	Cufflinks_novel	exon	89919946	89920146	200	transcript_id "cuff_1132"; gene_id "Cuff.1132"; gene_name "Cuff.1132"; locus "RLOC_00005438";
chr12	Cufflinks_novel	exon	89943783	89943997	214	transcript_id "cuff_1133"; gene_id "Cuff.1133"; gene_name "Cuff.1133"; locus "RLOC_00005439";
chr12	Cufflinks_novel	exon	89944877	89945131	254	transcript_id "cuff_1133"; gene_id "Cuff.1133"; gene_name "Cuff.1133"; locus "RLOC_00005439";
chr12	Cufflinks_novel	exon	89950155	89950337	182	transcript_id "cuff_1134"; gene_id "Cuff.1134"; gene_name "Cuff.1134"; locus "RLOC_00005440";
chr12	Cufflinks_novel	exon	89951939	89952130	191	transcript_id "cuff_1134"; gene_id "Cuff.1134"; gene_name "Cuff.1134"; locus "RLOC_00005440";
chr12	Cufflinks_novel	exon	91977057	91977241	184	transcript_id "cuff_1135"; gene_id "Cuff.1135"; gene_name "Cuff.1135"; locus "RLOC_00005443";
chr12	Cufflinks_novel	exon	91977498	91977722	224	transcript_id "cuff_1135"; gene_id "Cuff.1135"; gene_name "Cuff.1135"; locus "RLOC_00005443";
chr12	Cufflinks_novel	exon	91987879	91987906	27	transcript_id "cuff_1136"; gene_id "Cuff.1136"; gene_name "Cuff.1136"; locus "RLOC_00005444";
chr12	Cufflinks_novel	exon	91984770	91984852	82	transcript_id "cuff_1136"; gene_id "Cuff.1136"; gene_name "Cuff.1136"; locus "RLOC_00005444";
chr12	Cufflinks_novel	exon	91983537	91983675	138	transcript_id "cuff_1136"; gene_id "Cuff.1136"; gene_name "Cuff.1136"; locus "RLOC_00005444";
chr12	Cufflinks_novel	exon	91986968	91987140	172	transcript_id "cuff_1136"; gene_id "Cuff.1136"; gene_name "Cuff.1136"; locus "RLOC_00005444";
chr12	Cufflinks_novel	exon	91988799	91989019	220	transcript_id "cuff_1136"; gene_id "Cuff.1136"; gene_name "Cuff.1136"; locus "RLOC_00005444";
chr12	Cufflinks_novel	exon	91989189	91989424	235	transcript_id "cuff_1136"; gene_id "Cuff.1136"; gene_name "Cuff.1136"; locus "RLOC_00005444";
chr12	Cufflinks_novel	exon	91985119	91985549	430	transcript_id "cuff_1136"; gene_id "Cuff.1136"; gene_name "Cuff.1136"; locus "RLOC_00005444";
chr12	Cufflinks_novel	exon	92064552	92064613	61	transcript_id "cuff_1137"; gene_id "Cuff.1137"; gene_name "Cuff.1137"; locus "RLOC_00005445";
chr12	Cufflinks_novel	exon	92066306	92066439	133	transcript_id "cuff_1137"; gene_id "Cuff.1137"; gene_name "Cuff.1137"; locus "RLOC_00005445";
chr12	Cufflinks_novel	exon	92072118	92072145	27	transcript_id "cuff_1138"; gene_id "Cuff.1138"; gene_name "Cuff.1138"; locus "RLOC_00005446";
chr12	Cufflinks_novel	exon	92068788	92068831	43	transcript_id "cuff_1138"; gene_id "Cuff.1138"; gene_name "Cuff.1138"; locus "RLOC_00005446";
chr12	Cufflinks_novel	exon	92068884	92068965	81	transcript_id "cuff_1138"; gene_id "Cuff.1138"; gene_name "Cuff.1138"; locus "RLOC_00005446";
chr12	Cufflinks_novel	exon	92070099	92070187	88	transcript_id "cuff_1138"; gene_id "Cuff.1138"; gene_name "Cuff.1138"; locus "RLOC_00005446";
chr12	Cufflinks_novel	exon	92081922	92081949	27	transcript_id "cuff_1139"; gene_id "Cuff.1139"; gene_name "Cuff.1139"; locus "RLOC_00005447";
chr12	Cufflinks_novel	exon	92082816	92082843	27	transcript_id "cuff_1139"; gene_id "Cuff.1139"; gene_name "Cuff.1139"; locus "RLOC_00005447";
chr12	Cufflinks_novel	exon	92083680	92083738	58	transcript_id "cuff_1139"; gene_id "Cuff.1139"; gene_name "Cuff.1139"; locus "RLOC_00005447";
chr1	Cufflinks_novel	exon	53674565	53675257	692	transcript_id "cuff_114"; gene_id "Cuff.114"; gene_name "Cuff.114"; locus "RLOC_00000339";
chr12	Cufflinks_novel	exon	92097700	92097727	27	transcript_id "cuff_1140"; gene_id "Cuff.1140"; gene_name "Cuff.1140"; locus "RLOC_00005448";
chr12	Cufflinks_novel	exon	92096225	92096305	80	transcript_id "cuff_1140"; gene_id "Cuff.1140"; gene_name "Cuff.1140"; locus "RLOC_00005448";
chr12	Cufflinks_novel	exon	92097857	92097955	98	transcript_id "cuff_1140"; gene_id "Cuff.1140"; gene_name "Cuff.1140"; locus "RLOC_00005448";
chr12	Cufflinks_novel	exon	92102823	92102850	27	transcript_id "cuff_1141"; gene_id "Cuff.1141"; gene_name "Cuff.1141"; locus "RLOC_00005449";
chr12	Cufflinks_novel	exon	92103627	92103657	30	transcript_id "cuff_1141"; gene_id "Cuff.1141"; gene_name "Cuff.1141"; locus "RLOC_00005449";
chr12	Cufflinks_novel	exon	92100979	92101029	50	transcript_id "cuff_1141"; gene_id "Cuff.1141"; gene_name "Cuff.1141"; locus "RLOC_00005449";
chr12	Cufflinks_novel	exon	92122676	92122726	50	transcript_id "cuff_1142"; gene_id "Cuff.1142"; gene_name "Cuff.1142"; locus "RLOC_00005450";
chr12	Cufflinks_novel	exon	92121055	92121180	125	transcript_id "cuff_1142"; gene_id "Cuff.1142"; gene_name "Cuff.1142"; locus "RLOC_00005450";
chr12	Cufflinks_novel	exon	92124630	92124878	248	transcript_id "cuff_1142"; gene_id "Cuff.1142"; gene_name "Cuff.1142"; locus "RLOC_00005450";
chr12	Cufflinks_novel	exon	92133969	92133998	29	transcript_id "cuff_1143"; gene_id "Cuff.1143"; gene_name "Cuff.1143"; locus "RLOC_00005451";
chr12	Cufflinks_novel	exon	92130711	92130774	63	transcript_id "cuff_1143"; gene_id "Cuff.1143"; gene_name "Cuff.1143"; locus "RLOC_00005451";
chr12	Cufflinks_novel	exon	92130319	92130395	76	transcript_id "cuff_1143"; gene_id "Cuff.1143"; gene_name "Cuff.1143"; locus "RLOC_00005451";
chr12	Cufflinks_novel	exon	92132342	92132478	136	transcript_id "cuff_1143"; gene_id "Cuff.1143"; gene_name "Cuff.1143"; locus "RLOC_00005451";
chr12	Cufflinks_novel	exon	92133112	92133330	218	transcript_id "cuff_1143"; gene_id "Cuff.1143"; gene_name "Cuff.1143"; locus "RLOC_00005451";
chr12	Cufflinks_novel	exon	92145202	92145248	46	transcript_id "cuff_1144"; gene_id "Cuff.1144"; gene_name "Cuff.1144"; locus "RLOC_00005452";
chr12	Cufflinks_novel	exon	92144676	92144846	170	transcript_id "cuff_1144"; gene_id "Cuff.1144"; gene_name "Cuff.1144"; locus "RLOC_00005452";
chr12	Cufflinks_novel	exon	92151043	92151071	28	transcript_id "cuff_1145"; gene_id "Cuff.1145"; gene_name "Cuff.1145"; locus "RLOC_00005453";
chr12	Cufflinks_novel	exon	92148909	92148982	73	transcript_id "cuff_1145"; gene_id "Cuff.1145"; gene_name "Cuff.1145"; locus "RLOC_00005453";
chr12	Cufflinks_novel	exon	92151455	92151577	122	transcript_id "cuff_1145"; gene_id "Cuff.1145"; gene_name "Cuff.1145"; locus "RLOC_00005453";
chr12	Cufflinks_novel	exon	92150514	92150656	142	transcript_id "cuff_1145"; gene_id "Cuff.1145"; gene_name "Cuff.1145"; locus "RLOC_00005453";
chr12	Cufflinks_novel	exon	92153418	92153598	180	transcript_id "cuff_1145"; gene_id "Cuff.1145"; gene_name "Cuff.1145"; locus "RLOC_00005453";
chr12	Cufflinks_novel	exon	92161087	92161114	27	transcript_id "cuff_1146"; gene_id "Cuff.1146"; gene_name "Cuff.1146"; locus "RLOC_00005454";
chr12	Cufflinks_novel	exon	92159703	92159731	28	transcript_id "cuff_1146"; gene_id "Cuff.1146"; gene_name "Cuff.1146"; locus "RLOC_00005454";
chr12	Cufflinks_novel	exon	94235697	94235800	103	transcript_id "cuff_1147"; gene_id "Cuff.1147"; gene_name "Cuff.1147"; locus "RLOC_00005460";
chr12	Cufflinks_novel	exon	94236567	94236793	226	transcript_id "cuff_1147"; gene_id "Cuff.1147"; gene_name "Cuff.1147"; locus "RLOC_00005460";
chr12	Cufflinks_novel	exon	95013782	95013891	109	transcript_id "cuff_1148"; gene_id "Cuff.1148"; gene_name "Cuff.1148"; locus "RLOC_00005461";
chr12	Cufflinks_novel	exon	95015261	95015411	150	transcript_id "cuff_1148"; gene_id "Cuff.1148"; gene_name "Cuff.1148"; locus "RLOC_00005461";
chr12	Cufflinks_novel	exon	96151728	96151822	94	transcript_id "cuff_1149"; gene_id "Cuff.1149"; gene_name "Cuff.1149"; locus "RLOC_00005462";
chr12	Cufflinks_novel	exon	96152354	96152472	118	transcript_id "cuff_1149"; gene_id "Cuff.1149"; gene_name "Cuff.1149"; locus "RLOC_00005462";
chr12	Cufflinks_novel	exon	96153034	96153163	129	transcript_id "cuff_1149"; gene_id "Cuff.1149"; gene_name "Cuff.1149"; locus "RLOC_00005462";
chr12	Cufflinks_novel	exon	96153880	96154556	676	transcript_id "cuff_1149"; gene_id "Cuff.1149"; gene_name "Cuff.1149"; locus "RLOC_00005462";
chr1	Cufflinks_novel	exon	53687250	53687277	27	transcript_id "cuff_115"; gene_id "Cuff.115"; gene_name "Cuff.115"; locus "RLOC_00000340";
chr1	Cufflinks_novel	exon	53687070	53687169	99	transcript_id "cuff_115"; gene_id "Cuff.115"; gene_name "Cuff.115"; locus "RLOC_00000340";
chr12	Cufflinks_novel	exon	99611513	99611540	27	transcript_id "cuff_1150"; gene_id "Cuff.1150"; gene_name "Cuff.1150"; locus "RLOC_00005467";
chr12	Cufflinks_novel	exon	99612440	99612605	165	transcript_id "cuff_1150"; gene_id "Cuff.1150"; gene_name "Cuff.1150"; locus "RLOC_00005467";
chr12	Cufflinks_novel	exon	99612032	99612338	306	transcript_id "cuff_1150"; gene_id "Cuff.1150"; gene_name "Cuff.1150"; locus "RLOC_00005467";
chr12	Cufflinks_novel	exon	99617086	99617177	91	transcript_id "cuff_1151"; gene_id "Cuff.1151"; gene_name "Cuff.1151"; locus "RLOC_00005468";
chr12	Cufflinks_novel	exon	99616657	99616937	280	transcript_id "cuff_1151"; gene_id "Cuff.1151"; gene_name "Cuff.1151"; locus "RLOC_00005468";
chr12	Cufflinks_novel	exon	99615134	99615614	480	transcript_id "cuff_1151"; gene_id "Cuff.1151"; gene_name "Cuff.1151"; locus "RLOC_00005468";
chr12	Cufflinks_novel	exon	99621323	99622006	683	transcript_id "cuff_1152"; gene_id "Cuff.1152"; gene_name "Cuff.1152"; locus "RLOC_00005470";
chr12	Cufflinks_novel	exon	99669641	99669861	220	transcript_id "cuff_1153"; gene_id "Cuff.1153"; gene_name "Cuff.1153"; locus "RLOC_00005475";
chr12	Cufflinks_novel	exon	99668834	99669499	665	transcript_id "cuff_1153"; gene_id "Cuff.1153"; gene_name "Cuff.1153"; locus "RLOC_00005475";
chr12	Cufflinks_novel	exon	100249073	100249227	154	transcript_id "cuff_1154"; gene_id "Cuff.1154"; gene_name "Cuff.1154"; locus "RLOC_00005483";
chr12	Cufflinks_novel	exon	100249303	100249850	547	transcript_id "cuff_1154"; gene_id "Cuff.1154"; gene_name "Cuff.1154"; locus "RLOC_00005483";
chr12	Cufflinks_novel	exon	100400733	100400925	192	transcript_id "cuff_1155"; gene_id "Cuff.1155"; gene_name "Cuff.1155"; locus "RLOC_00005484";
chr12	Cufflinks_novel	exon	100399518	100400394	876	transcript_id "cuff_1155"; gene_id "Cuff.1155"; gene_name "Cuff.1155"; locus "RLOC_00005484";
chr12	Cufflinks_novel	exon	100865828	100865857	29	transcript_id "cuff_1156"; gene_id "Cuff.1156"; gene_name "Cuff.1156"; locus "RLOC_00005486";
chr12	Cufflinks_novel	exon	100864316	100864559	243	transcript_id "cuff_1156"; gene_id "Cuff.1156"; gene_name "Cuff.1156"; locus "RLOC_00005486";
chr12	Cufflinks_novel	exon	101122473	101122500	27	transcript_id "cuff_1157"; gene_id "Cuff.1157"; gene_name "Cuff.1157"; locus "RLOC_00005488";
chr12	Cufflinks_novel	exon	101122268	101122336	68	transcript_id "cuff_1157"; gene_id "Cuff.1157"; gene_name "Cuff.1157"; locus "RLOC_00005488";
chr12	Cufflinks_novel	exon	101402928	101402990	62	transcript_id "cuff_1158"; gene_id "Cuff.1158"; gene_name "Cuff.1158"; locus "RLOC_00005493";
chr12	Cufflinks_novel	exon	101401740	101401844	104	transcript_id "cuff_1158"; gene_id "Cuff.1158"; gene_name "Cuff.1158"; locus "RLOC_00005493";
chr12	Cufflinks_novel	exon	101400961	101401155	194	transcript_id "cuff_1158"; gene_id "Cuff.1158"; gene_name "Cuff.1158"; locus "RLOC_00005493";
chr12	Cufflinks_novel	exon	101418237	101418264	27	transcript_id "cuff_1159"; gene_id "Cuff.1159"; gene_name "Cuff.1159"; locus "RLOC_00005494";
chr12	Cufflinks_novel	exon	101418684	101418888	204	transcript_id "cuff_1159"; gene_id "Cuff.1159"; gene_name "Cuff.1159"; locus "RLOC_00005494";
chr12	Cufflinks_novel	exon	101416308	101416545	237	transcript_id "cuff_1159"; gene_id "Cuff.1159"; gene_name "Cuff.1159"; locus "RLOC_00005494";
chr12	Cufflinks_novel	exon	101414748	101415137	389	transcript_id "cuff_1159"; gene_id "Cuff.1159"; gene_name "Cuff.1159"; locus "RLOC_00005494";
chr1	Cufflinks_novel	exon	53692835	53692927	92	transcript_id "cuff_116"; gene_id "Cuff.116"; gene_name "Cuff.116"; locus "RLOC_00000341";
chr1	Cufflinks_novel	exon	53692053	53692243	190	transcript_id "cuff_116"; gene_id "Cuff.116"; gene_name "Cuff.116"; locus "RLOC_00000341";
chr12	Cufflinks_novel	exon	102322128	102322175	47	transcript_id "cuff_1160"; gene_id "Cuff.1160"; gene_name "Cuff.1160"; locus "RLOC_00005503";
chr12	Cufflinks_novel	exon	102326281	102326362	81	transcript_id "cuff_1160"; gene_id "Cuff.1160"; gene_name "Cuff.1160"; locus "RLOC_00005503";
chr12	Cufflinks_novel	exon	102322500	102322617	117	transcript_id "cuff_1160"; gene_id "Cuff.1160"; gene_name "Cuff.1160"; locus "RLOC_00005503";
chr12	Cufflinks_novel	exon	102324343	102324590	247	transcript_id "cuff_1160"; gene_id "Cuff.1160"; gene_name "Cuff.1160"; locus "RLOC_00005503";
chr12	Cufflinks_novel	exon	102343180	102343207	27	transcript_id "cuff_1161"; gene_id "Cuff.1161"; gene_name "Cuff.1161"; locus "RLOC_00005504";
chr12	Cufflinks_novel	exon	102342573	102342621	48	transcript_id "cuff_1161"; gene_id "Cuff.1161"; gene_name "Cuff.1161"; locus "RLOC_00005504";
chr12	Cufflinks_novel	exon	102343308	102343440	132	transcript_id "cuff_1161"; gene_id "Cuff.1161"; gene_name "Cuff.1161"; locus "RLOC_00005504";
chr12	Cufflinks_novel	exon	102343529	102343752	223	transcript_id "cuff_1161"; gene_id "Cuff.1161"; gene_name "Cuff.1161"; locus "RLOC_00005504";
chr12	Cufflinks_novel	exon	102352531	102352681	150	transcript_id "cuff_1162"; gene_id "Cuff.1162"; gene_name "Cuff.1162"; locus "RLOC_00005505";
chr12	Cufflinks_novel	exon	102353349	102353541	192	transcript_id "cuff_1162"; gene_id "Cuff.1162"; gene_name "Cuff.1162"; locus "RLOC_00005505";
chr12	Cufflinks_novel	exon	102484701	102484734	33	transcript_id "cuff_1163"; gene_id "Cuff.1163"; gene_name "Cuff.1163"; locus "RLOC_00005507";
chr12	Cufflinks_novel	exon	102483757	102484072	315	transcript_id "cuff_1163"; gene_id "Cuff.1163"; gene_name "Cuff.1163"; locus "RLOC_00005507";
chr12	Cufflinks_novel	exon	102503381	102503408	27	transcript_id "cuff_1164"; gene_id "Cuff.1164"; gene_name "Cuff.1164"; locus "RLOC_00005508";
chr12	Cufflinks_novel	exon	102505222	102505338	116	transcript_id "cuff_1164"; gene_id "Cuff.1164"; gene_name "Cuff.1164"; locus "RLOC_00005508";
chr12	Cufflinks_novel	exon	102506194	102506346	152	transcript_id "cuff_1164"; gene_id "Cuff.1164"; gene_name "Cuff.1164"; locus "RLOC_00005508";
chr12	Cufflinks_novel	exon	102520306	102520333	27	transcript_id "cuff_1165"; gene_id "Cuff.1165"; gene_name "Cuff.1165"; locus "RLOC_00005509";
chr12	Cufflinks_novel	exon	102519294	102519454	160	transcript_id "cuff_1165"; gene_id "Cuff.1165"; gene_name "Cuff.1165"; locus "RLOC_00005509";
chr12	Cufflinks_novel	exon	102555111	102555190	79	transcript_id "cuff_1166"; gene_id "Cuff.1166"; gene_name "Cuff.1166"; locus "RLOC_00005510";
chr12	Cufflinks_novel	exon	102555570	102555652	82	transcript_id "cuff_1166"; gene_id "Cuff.1166"; gene_name "Cuff.1166"; locus "RLOC_00005510";
chr12	Cufflinks_novel	exon	102580537	102580665	128	transcript_id "cuff_1167"; gene_id "Cuff.1167"; gene_name "Cuff.1167"; locus "RLOC_00005511";
chr12	Cufflinks_novel	exon	102582262	102582460	198	transcript_id "cuff_1167"; gene_id "Cuff.1167"; gene_name "Cuff.1167"; locus "RLOC_00005511";
chr12	Cufflinks_novel	exon	102581364	102581652	288	transcript_id "cuff_1167"; gene_id "Cuff.1167"; gene_name "Cuff.1167"; locus "RLOC_00005511";
chr12	Cufflinks_novel	exon	103072649	103072692	43	transcript_id "cuff_1168"; gene_id "Cuff.1168"; gene_name "Cuff.1168"; locus "RLOC_00005515";
chr12	Cufflinks_novel	exon	103073356	103073411	55	transcript_id "cuff_1168"; gene_id "Cuff.1168"; gene_name "Cuff.1168"; locus "RLOC_00005515";
chr12	Cufflinks_novel	exon	103073202	103073265	63	transcript_id "cuff_1168"; gene_id "Cuff.1168"; gene_name "Cuff.1168"; locus "RLOC_00005515";
chr12	Cufflinks_novel	exon	103071323	103071566	243	transcript_id "cuff_1168"; gene_id "Cuff.1168"; gene_name "Cuff.1168"; locus "RLOC_00005515";
chr12	Cufflinks_novel	exon	103153779	103153828	49	transcript_id "cuff_1169"; gene_id "Cuff.1169"; gene_name "Cuff.1169"; locus "RLOC_00005517";
chr12	Cufflinks_novel	exon	103151992	103152168	176	transcript_id "cuff_1169"; gene_id "Cuff.1169"; gene_name "Cuff.1169"; locus "RLOC_00005517";
chr1	Cufflinks_novel	exon	53721196	53721256	60	transcript_id "cuff_117"; gene_id "Cuff.117"; gene_name "Cuff.117"; locus "RLOC_00000342";
chr1	Cufflinks_novel	exon	53720651	53720727	76	transcript_id "cuff_117"; gene_id "Cuff.117"; gene_name "Cuff.117"; locus "RLOC_00000342";
chr1	Cufflinks_novel	exon	53719165	53719389	224	transcript_id "cuff_117"; gene_id "Cuff.117"; gene_name "Cuff.117"; locus "RLOC_00000342";
chr12	Cufflinks_novel	exon	103206346	103206399	53	transcript_id "cuff_1170"; gene_id "Cuff.1170"; gene_name "Cuff.1170"; locus "RLOC_00005519";
chr12	Cufflinks_novel	exon	103207704	103207840	136	transcript_id "cuff_1170"; gene_id "Cuff.1170"; gene_name "Cuff.1170"; locus "RLOC_00005519";
chr12	Cufflinks_novel	exon	103963885	103963912	27	transcript_id "cuff_1171"; gene_id "Cuff.1171"; gene_name "Cuff.1171"; locus "RLOC_00005528";
chr12	Cufflinks_novel	exon	103965195	103965411	216	transcript_id "cuff_1171"; gene_id "Cuff.1171"; gene_name "Cuff.1171"; locus "RLOC_00005528";
chr12	Cufflinks_novel	exon	104020049	104020079	30	transcript_id "cuff_1172"; gene_id "Cuff.1172"; gene_name "Cuff.1172"; locus "RLOC_00005532";
chr12	Cufflinks_novel	exon	104019908	104019966	58	transcript_id "cuff_1172"; gene_id "Cuff.1172"; gene_name "Cuff.1172"; locus "RLOC_00005532";
chr12	Cufflinks_novel	exon	104020231	104020292	61	transcript_id "cuff_1172"; gene_id "Cuff.1172"; gene_name "Cuff.1172"; locus "RLOC_00005532";
chr12	Cufflinks_novel	exon	104020414	104020479	65	transcript_id "cuff_1172"; gene_id "Cuff.1172"; gene_name "Cuff.1172"; locus "RLOC_00005532";
chr12	Cufflinks_novel	exon	104019046	104019151	105	transcript_id "cuff_1172"; gene_id "Cuff.1172"; gene_name "Cuff.1172"; locus "RLOC_00005532";
chr12	Cufflinks_novel	exon	104019354	104019674	320	transcript_id "cuff_1172"; gene_id "Cuff.1172"; gene_name "Cuff.1172"; locus "RLOC_00005532";
chr12	Cufflinks_novel	exon	104550712	104550739	27	transcript_id "cuff_1173"; gene_id "Cuff.1173"; gene_name "Cuff.1173"; locus "RLOC_00005537";
chr12	Cufflinks_novel	exon	104550984	104551034	50	transcript_id "cuff_1173"; gene_id "Cuff.1173"; gene_name "Cuff.1173"; locus "RLOC_00005537";
chr12	Cufflinks_novel	exon	104551286	104551439	153	transcript_id "cuff_1173"; gene_id "Cuff.1173"; gene_name "Cuff.1173"; locus "RLOC_00005537";
chr12	Cufflinks_novel	exon	104549575	104549735	160	transcript_id "cuff_1173"; gene_id "Cuff.1173"; gene_name "Cuff.1173"; locus "RLOC_00005537";
chr12	Cufflinks_novel	exon	104552555	104552938	383	transcript_id "cuff_1173"; gene_id "Cuff.1173"; gene_name "Cuff.1173"; locus "RLOC_00005537";
chr12	Cufflinks_novel	exon	106103664	106103691	27	transcript_id "cuff_1174"; gene_id "Cuff.1174"; gene_name "Cuff.1174"; locus "RLOC_00005572";
chr12	Cufflinks_novel	exon	106105387	106105657	270	transcript_id "cuff_1174"; gene_id "Cuff.1174"; gene_name "Cuff.1174"; locus "RLOC_00005572";
chr12	Cufflinks_novel	exon	106111961	106112040	79	transcript_id "cuff_1175"; gene_id "Cuff.1175"; gene_name "Cuff.1175"; locus "RLOC_00005573";
chr12	Cufflinks_novel	exon	106111491	106111640	149	transcript_id "cuff_1175"; gene_id "Cuff.1175"; gene_name "Cuff.1175"; locus "RLOC_00005573";
chr12	Cufflinks_novel	exon	106109560	106109743	183	transcript_id "cuff_1175"; gene_id "Cuff.1175"; gene_name "Cuff.1175"; locus "RLOC_00005573";
chr12	Cufflinks_novel	exon	108972815	108972842	27	transcript_id "cuff_1176"; gene_id "Cuff.1176"; gene_name "Cuff.1176"; locus "RLOC_00005594";
chr12	Cufflinks_novel	exon	108974830	108974897	67	transcript_id "cuff_1176"; gene_id "Cuff.1176"; gene_name "Cuff.1176"; locus "RLOC_00005594";
chr12	Cufflinks_novel	exon	108974258	108974365	107	transcript_id "cuff_1176"; gene_id "Cuff.1176"; gene_name "Cuff.1176"; locus "RLOC_00005594";
chr12	Cufflinks_novel	exon	108973949	108974204	255	transcript_id "cuff_1176"; gene_id "Cuff.1176"; gene_name "Cuff.1176"; locus "RLOC_00005594";
chr12	Cufflinks_novel	exon	109514921	109515071	150	transcript_id "cuff_1177"; gene_id "Cuff.1177"; gene_name "Cuff.1177"; locus "RLOC_00005599";
chr12	Cufflinks_novel	exon	109516927	109517121	194	transcript_id "cuff_1177"; gene_id "Cuff.1177"; gene_name "Cuff.1177"; locus "RLOC_00005599";
chr12	Cufflinks_novel	exon	110029951	110029999	48	transcript_id "cuff_1178"; gene_id "Cuff.1178"; gene_name "Cuff.1178"; locus "RLOC_00005605";
chr12	Cufflinks_novel	exon	110031199	110031263	64	transcript_id "cuff_1178"; gene_id "Cuff.1178"; gene_name "Cuff.1178"; locus "RLOC_00005605";
chr12	Cufflinks_novel	exon	110058183	110058210	27	transcript_id "cuff_1179"; gene_id "Cuff.1179"; gene_name "Cuff.1179"; locus "RLOC_00005607";
chr12	Cufflinks_novel	exon	110057082	110057187	105	transcript_id "cuff_1179"; gene_id "Cuff.1179"; gene_name "Cuff.1179"; locus "RLOC_00005607";
chr1	Cufflinks_novel	exon	53737049	53737136	87	transcript_id "cuff_118"; gene_id "Cuff.118"; gene_name "Cuff.118"; locus "RLOC_00000343";
chr1	Cufflinks_novel	exon	53735492	53735598	106	transcript_id "cuff_118"; gene_id "Cuff.118"; gene_name "Cuff.118"; locus "RLOC_00000343";
chr12	Cufflinks_novel	exon	111133600	111133713	113	transcript_id "cuff_1180"; gene_id "Cuff.1180"; gene_name "Cuff.1180"; locus "RLOC_00005671";
chr12	Cufflinks_novel	exon	111133875	111134018	143	transcript_id "cuff_1180"; gene_id "Cuff.1180"; gene_name "Cuff.1180"; locus "RLOC_00005671";
chr12	Cufflinks_novel	exon	111474464	111474491	27	transcript_id "cuff_1181"; gene_id "Cuff.1181"; gene_name "Cuff.1181"; locus "RLOC_00005672";
chr12	Cufflinks_novel	exon	111475197	111475265	68	transcript_id "cuff_1181"; gene_id "Cuff.1181"; gene_name "Cuff.1181"; locus "RLOC_00005672";
chr12	Cufflinks_novel	exon	111838988	111839015	27	transcript_id "cuff_1182"; gene_id "Cuff.1182"; gene_name "Cuff.1182"; locus "RLOC_00005677";
chr12	Cufflinks_novel	exon	111838518	111838554	36	transcript_id "cuff_1182"; gene_id "Cuff.1182"; gene_name "Cuff.1182"; locus "RLOC_00005677";
chr12	Cufflinks_novel	exon	111839431	111839479	48	transcript_id "cuff_1182"; gene_id "Cuff.1182"; gene_name "Cuff.1182"; locus "RLOC_00005677";
chr12	Cufflinks_novel	exon	111837569	111837779	210	transcript_id "cuff_1182"; gene_id "Cuff.1182"; gene_name "Cuff.1182"; locus "RLOC_00005677";
chr12	Cufflinks_novel	exon	111839076	111839328	252	transcript_id "cuff_1182"; gene_id "Cuff.1182"; gene_name "Cuff.1182"; locus "RLOC_00005677";
chr12	Cufflinks_novel	exon	111936876	111937036	160	transcript_id "cuff_1183"; gene_id "Cuff.1183"; gene_name "Cuff.1183"; locus "RLOC_00005681";
chr12	Cufflinks_novel	exon	111935078	111935285	207	transcript_id "cuff_1183"; gene_id "Cuff.1183"; gene_name "Cuff.1183"; locus "RLOC_00005681";
chr12	Cufflinks_novel	exon	112083203	112083230	27	transcript_id "cuff_1184"; gene_id "Cuff.1184"; gene_name "Cuff.1184"; locus "RLOC_00005684";
chr12	Cufflinks_novel	exon	112081626	112081731	105	transcript_id "cuff_1184"; gene_id "Cuff.1184"; gene_name "Cuff.1184"; locus "RLOC_00005684";
chr12	Cufflinks_novel	exon	112079307	112079458	151	transcript_id "cuff_1184"; gene_id "Cuff.1184"; gene_name "Cuff.1184"; locus "RLOC_00005684";
chr12	Cufflinks_novel	exon	112080685	112081030	345	transcript_id "cuff_1184"; gene_id "Cuff.1184"; gene_name "Cuff.1184"; locus "RLOC_00005684";
chr12	Cufflinks_novel	exon	112218040	112218067	27	transcript_id "cuff_1185"; gene_id "Cuff.1185"; gene_name "Cuff.1185"; locus "RLOC_00005689";
chr12	Cufflinks_novel	exon	112217536	112217691	155	transcript_id "cuff_1185"; gene_id "Cuff.1185"; gene_name "Cuff.1185"; locus "RLOC_00005689";
chr12	Cufflinks_novel	exon	112507744	112507841	97	transcript_id "cuff_1186"; gene_id "Cuff.1186"; gene_name "Cuff.1186"; locus "RLOC_00005692";
chr12	Cufflinks_novel	exon	112508383	112508962	579	transcript_id "cuff_1186"; gene_id "Cuff.1186"; gene_name "Cuff.1186"; locus "RLOC_00005692";
chr12	Cufflinks_novel	exon	112812530	112812609	79	transcript_id "cuff_1187"; gene_id "Cuff.1187"; gene_name "Cuff.1187"; locus "RLOC_00005701";
chr12	Cufflinks_novel	exon	112810572	112810910	338	transcript_id "cuff_1187"; gene_id "Cuff.1187"; gene_name "Cuff.1187"; locus "RLOC_00005701";
chr12	Cufflinks_novel	exon	112812111	112812477	366	transcript_id "cuff_1187"; gene_id "Cuff.1187"; gene_name "Cuff.1187"; locus "RLOC_00005701";
chr12	Cufflinks_novel	exon	112810995	112811494	499	transcript_id "cuff_1187"; gene_id "Cuff.1187"; gene_name "Cuff.1187"; locus "RLOC_00005701";
chr12	Cufflinks_novel	exon	114111311	114111338	27	transcript_id "cuff_1188"; gene_id "Cuff.1188"; gene_name "Cuff.1188"; locus "RLOC_00005732";
chr12	Cufflinks_novel	exon	114113507	114113544	37	transcript_id "cuff_1188"; gene_id "Cuff.1188"; gene_name "Cuff.1188"; locus "RLOC_00005732";
chr12	Cufflinks_novel	exon	114113290	114113372	82	transcript_id "cuff_1188"; gene_id "Cuff.1188"; gene_name "Cuff.1188"; locus "RLOC_00005732";
chr12	Cufflinks_novel	exon	114193940	114194010	70	transcript_id "cuff_1189"; gene_id "Cuff.1189"; gene_name "Cuff.1189"; locus "RLOC_00005735";
chr12	Cufflinks_novel	exon	114195274	114195431	157	transcript_id "cuff_1189"; gene_id "Cuff.1189"; gene_name "Cuff.1189"; locus "RLOC_00005735";
chr12	Cufflinks_novel	exon	114194329	114194548	219	transcript_id "cuff_1189"; gene_id "Cuff.1189"; gene_name "Cuff.1189"; locus "RLOC_00005735";
chr12	Cufflinks_novel	exon	114195561	114195910	349	transcript_id "cuff_1189"; gene_id "Cuff.1189"; gene_name "Cuff.1189"; locus "RLOC_00005735";
chr1	Cufflinks_novel	exon	53743582	53743609	27	transcript_id "cuff_119"; gene_id "Cuff.119"; gene_name "Cuff.119"; locus "RLOC_00000344";
chr1	Cufflinks_novel	exon	53741144	53741371	227	transcript_id "cuff_119"; gene_id "Cuff.119"; gene_name "Cuff.119"; locus "RLOC_00000344";
chr1	Cufflinks_novel	exon	53741689	53741922	233	transcript_id "cuff_119"; gene_id "Cuff.119"; gene_name "Cuff.119"; locus "RLOC_00000344";
chr12	Cufflinks_novel	exon	114378043	114378070	27	transcript_id "cuff_1190"; gene_id "Cuff.1190"; gene_name "Cuff.1190"; locus "RLOC_00005741";
chr12	Cufflinks_novel	exon	114377521	114377646	125	transcript_id "cuff_1190"; gene_id "Cuff.1190"; gene_name "Cuff.1190"; locus "RLOC_00005741";
chr12	Cufflinks_novel	exon	114377751	114377908	157	transcript_id "cuff_1190"; gene_id "Cuff.1190"; gene_name "Cuff.1190"; locus "RLOC_00005741";
chr12	Cufflinks_novel	exon	117190689	117190716	27	transcript_id "cuff_1191"; gene_id "Cuff.1191"; gene_name "Cuff.1191"; locus "RLOC_00005748";
chr12	Cufflinks_novel	exon	117190845	117190911	66	transcript_id "cuff_1191"; gene_id "Cuff.1191"; gene_name "Cuff.1191"; locus "RLOC_00005748";
chr12	Cufflinks_novel	exon	117219467	117219494	27	transcript_id "cuff_1192"; gene_id "Cuff.1192"; gene_name "Cuff.1192"; locus "RLOC_00005749";
chr12	Cufflinks_novel	exon	117219824	117219853	29	transcript_id "cuff_1192"; gene_id "Cuff.1192"; gene_name "Cuff.1192"; locus "RLOC_00005749";
chr12	Cufflinks_novel	exon	117218761	117218879	118	transcript_id "cuff_1192"; gene_id "Cuff.1192"; gene_name "Cuff.1192"; locus "RLOC_00005749";
chr12	Cufflinks_novel	exon	117232158	117232254	96	transcript_id "cuff_1193"; gene_id "Cuff.1193"; gene_name "Cuff.1193"; locus "RLOC_00005750";
chr12	Cufflinks_novel	exon	117231477	117231622	145	transcript_id "cuff_1193"; gene_id "Cuff.1193"; gene_name "Cuff.1193"; locus "RLOC_00005750";
chr12	Cufflinks_novel	exon	117617070	117617237	167	transcript_id "cuff_1194"; gene_id "Cuff.1194"; gene_name "Cuff.1194"; locus "RLOC_00005755";
chr12	Cufflinks_novel	exon	117614824	117615153	329	transcript_id "cuff_1194"; gene_id "Cuff.1194"; gene_name "Cuff.1194"; locus "RLOC_00005755";
chr12	Cufflinks_novel	exon	120497849	120497876	27	transcript_id "cuff_1195"; gene_id "Cuff.1195"; gene_name "Cuff.1195"; locus "RLOC_00005768";
chr12	Cufflinks_novel	exon	120498054	120498081	27	transcript_id "cuff_1195"; gene_id "Cuff.1195"; gene_name "Cuff.1195"; locus "RLOC_00005768";
chr13	Cufflinks_novel	exon	3119345	3119374	29	transcript_id "cuff_1196"; gene_id "Cuff.1196"; gene_name "Cuff.1196"; locus "RLOC_00005771";
chr13	Cufflinks_novel	exon	3123355	3123490	135	transcript_id "cuff_1196"; gene_id "Cuff.1196"; gene_name "Cuff.1196"; locus "RLOC_00005771";
chr13	Cufflinks_novel	exon	3120351	3120502	151	transcript_id "cuff_1196"; gene_id "Cuff.1196"; gene_name "Cuff.1196"; locus "RLOC_00005771";
chr13	Cufflinks_novel	exon	3119457	3119619	162	transcript_id "cuff_1196"; gene_id "Cuff.1196"; gene_name "Cuff.1196"; locus "RLOC_00005771";
chr13	Cufflinks_novel	exon	3121255	3121418	163	transcript_id "cuff_1196"; gene_id "Cuff.1196"; gene_name "Cuff.1196"; locus "RLOC_00005771";
chr13	Cufflinks_novel	exon	3123903	3124100	197	transcript_id "cuff_1196"; gene_id "Cuff.1196"; gene_name "Cuff.1196"; locus "RLOC_00005771";
chr13	Cufflinks_novel	exon	3124384	3124585	201	transcript_id "cuff_1196"; gene_id "Cuff.1196"; gene_name "Cuff.1196"; locus "RLOC_00005771";
chr13	Cufflinks_novel	exon	3123573	3123836	263	transcript_id "cuff_1196"; gene_id "Cuff.1196"; gene_name "Cuff.1196"; locus "RLOC_00005771";
chr13	Cufflinks_novel	exon	3117824	3118145	321	transcript_id "cuff_1196"; gene_id "Cuff.1196"; gene_name "Cuff.1196"; locus "RLOC_00005771";
chr13	Cufflinks_novel	exon	3126616	3126643	27	transcript_id "cuff_1197"; gene_id "Cuff.1197"; gene_name "Cuff.1197"; locus "RLOC_00005772";
chr13	Cufflinks_novel	exon	3127558	3127637	79	transcript_id "cuff_1197"; gene_id "Cuff.1197"; gene_name "Cuff.1197"; locus "RLOC_00005772";
chr13	Cufflinks_novel	exon	3132154	3132223	69	transcript_id "cuff_1198"; gene_id "Cuff.1198"; gene_name "Cuff.1198"; locus "RLOC_00005773";
chr13	Cufflinks_novel	exon	3134266	3134355	89	transcript_id "cuff_1198"; gene_id "Cuff.1198"; gene_name "Cuff.1198"; locus "RLOC_00005773";
chr13	Cufflinks_novel	exon	3133857	3133991	134	transcript_id "cuff_1198"; gene_id "Cuff.1198"; gene_name "Cuff.1198"; locus "RLOC_00005773";
chr13	Cufflinks_novel	exon	3137652	3137682	30	transcript_id "cuff_1199"; gene_id "Cuff.1199"; gene_name "Cuff.1199"; locus "RLOC_00005774";
chr13	Cufflinks_novel	exon	3137136	3137243	107	transcript_id "cuff_1199"; gene_id "Cuff.1199"; gene_name "Cuff.1199"; locus "RLOC_00005774";
chr13	Cufflinks_novel	exon	3137755	3138026	271	transcript_id "cuff_1199"; gene_id "Cuff.1199"; gene_name "Cuff.1199"; locus "RLOC_00005774";
chr13	Cufflinks_novel	exon	3139125	3139398	273	transcript_id "cuff_1199"; gene_id "Cuff.1199"; gene_name "Cuff.1199"; locus "RLOC_00005774";
chr13	Cufflinks_novel	exon	3138440	3138857	417	transcript_id "cuff_1199"; gene_id "Cuff.1199"; gene_name "Cuff.1199"; locus "RLOC_00005774";
chr1	Cufflinks_novel	exon	11325289	11325316	27	transcript_id "cuff_12"; gene_id "Cuff.12"; gene_name "Cuff.12"; locus "RLOC_00000043";
chr1	Cufflinks_novel	exon	11328211	11328286	75	transcript_id "cuff_12"; gene_id "Cuff.12"; gene_name "Cuff.12"; locus "RLOC_00000043";
chr1	Cufflinks_novel	exon	11326017	11326105	88	transcript_id "cuff_12"; gene_id "Cuff.12"; gene_name "Cuff.12"; locus "RLOC_00000043";
chr1	Cufflinks_novel	exon	11327575	11327744	169	transcript_id "cuff_12"; gene_id "Cuff.12"; gene_name "Cuff.12"; locus "RLOC_00000043";
chr1	Cufflinks_novel	exon	53763541	53763568	27	transcript_id "cuff_120"; gene_id "Cuff.120"; gene_name "Cuff.120"; locus "RLOC_00000346";
chr1	Cufflinks_novel	exon	53764164	53764279	115	transcript_id "cuff_120"; gene_id "Cuff.120"; gene_name "Cuff.120"; locus "RLOC_00000346";
chr13	Cufflinks_novel	exon	3144532	3144658	126	transcript_id "cuff_1200"; gene_id "Cuff.1200"; gene_name "Cuff.1200"; locus "RLOC_00005775";
chr13	Cufflinks_novel	exon	3143873	3144031	158	transcript_id "cuff_1200"; gene_id "Cuff.1200"; gene_name "Cuff.1200"; locus "RLOC_00005775";
chr13	Cufflinks_novel	exon	3611278	3611307	29	transcript_id "cuff_1201"; gene_id "Cuff.1201"; gene_name "Cuff.1201"; locus "RLOC_00005780";
chr13	Cufflinks_novel	exon	3611010	3611052	42	transcript_id "cuff_1201"; gene_id "Cuff.1201"; gene_name "Cuff.1201"; locus "RLOC_00005780";
chr13	Cufflinks_novel	exon	3610505	3610558	53	transcript_id "cuff_1201"; gene_id "Cuff.1201"; gene_name "Cuff.1201"; locus "RLOC_00005780";
chr13	Cufflinks_novel	exon	3612278	3612481	203	transcript_id "cuff_1201"; gene_id "Cuff.1201"; gene_name "Cuff.1201"; locus "RLOC_00005780";
chr13	Cufflinks_novel	exon	3612532	3612806	274	transcript_id "cuff_1201"; gene_id "Cuff.1201"; gene_name "Cuff.1201"; locus "RLOC_00005780";
chr13	Cufflinks_novel	exon	5857260	5857287	27	transcript_id "cuff_1202"; gene_id "Cuff.1202"; gene_name "Cuff.1202"; locus "RLOC_00005798";
chr13	Cufflinks_novel	exon	5855688	5855906	218	transcript_id "cuff_1202"; gene_id "Cuff.1202"; gene_name "Cuff.1202"; locus "RLOC_00005798";
chr13	Cufflinks_novel	exon	5856325	5856770	445	transcript_id "cuff_1202"; gene_id "Cuff.1202"; gene_name "Cuff.1202"; locus "RLOC_00005798";
chr13	Cufflinks_novel	exon	7449182	7449313	131	transcript_id "cuff_1203"; gene_id "Cuff.1203"; gene_name "Cuff.1203"; locus "RLOC_00005802";
chr13	Cufflinks_novel	exon	7452067	7452205	138	transcript_id "cuff_1203"; gene_id "Cuff.1203"; gene_name "Cuff.1203"; locus "RLOC_00005802";
chr13	Cufflinks_novel	exon	7451523	7451665	142	transcript_id "cuff_1203"; gene_id "Cuff.1203"; gene_name "Cuff.1203"; locus "RLOC_00005802";
chr13	Cufflinks_novel	exon	7446090	7446256	166	transcript_id "cuff_1203"; gene_id "Cuff.1203"; gene_name "Cuff.1203"; locus "RLOC_00005802";
chr13	Cufflinks_novel	exon	7449905	7450123	218	transcript_id "cuff_1203"; gene_id "Cuff.1203"; gene_name "Cuff.1203"; locus "RLOC_00005802";
chr13	Cufflinks_novel	exon	7447347	7447599	252	transcript_id "cuff_1203"; gene_id "Cuff.1203"; gene_name "Cuff.1203"; locus "RLOC_00005802";
chr13	Cufflinks_novel	exon	7456375	7456402	27	transcript_id "cuff_1204"; gene_id "Cuff.1204"; gene_name "Cuff.1204"; locus "RLOC_00005803";
chr13	Cufflinks_novel	exon	7458438	7458488	50	transcript_id "cuff_1204"; gene_id "Cuff.1204"; gene_name "Cuff.1204"; locus "RLOC_00005803";
chr13	Cufflinks_novel	exon	7457494	7457550	56	transcript_id "cuff_1204"; gene_id "Cuff.1204"; gene_name "Cuff.1204"; locus "RLOC_00005803";
chr13	Cufflinks_novel	exon	7455344	7455453	109	transcript_id "cuff_1204"; gene_id "Cuff.1204"; gene_name "Cuff.1204"; locus "RLOC_00005803";
chr13	Cufflinks_novel	exon	7456714	7456849	135	transcript_id "cuff_1204"; gene_id "Cuff.1204"; gene_name "Cuff.1204"; locus "RLOC_00005803";
chr13	Cufflinks_novel	exon	7469156	7469235	79	transcript_id "cuff_1205"; gene_id "Cuff.1205"; gene_name "Cuff.1205"; locus "RLOC_00005804";
chr13	Cufflinks_novel	exon	7465822	7465965	143	transcript_id "cuff_1205"; gene_id "Cuff.1205"; gene_name "Cuff.1205"; locus "RLOC_00005804";
chr13	Cufflinks_novel	exon	7463479	7463636	157	transcript_id "cuff_1205"; gene_id "Cuff.1205"; gene_name "Cuff.1205"; locus "RLOC_00005804";
chr13	Cufflinks_novel	exon	7466416	7466585	169	transcript_id "cuff_1205"; gene_id "Cuff.1205"; gene_name "Cuff.1205"; locus "RLOC_00005804";
chr13	Cufflinks_novel	exon	7470263	7470440	177	transcript_id "cuff_1205"; gene_id "Cuff.1205"; gene_name "Cuff.1205"; locus "RLOC_00005804";
chr13	Cufflinks_novel	exon	7464469	7464647	178	transcript_id "cuff_1205"; gene_id "Cuff.1205"; gene_name "Cuff.1205"; locus "RLOC_00005804";
chr13	Cufflinks_novel	exon	7463191	7463407	216	transcript_id "cuff_1205"; gene_id "Cuff.1205"; gene_name "Cuff.1205"; locus "RLOC_00005804";
chr13	Cufflinks_novel	exon	7470657	7470971	314	transcript_id "cuff_1205"; gene_id "Cuff.1205"; gene_name "Cuff.1205"; locus "RLOC_00005804";
chr13	Cufflinks_novel	exon	7467194	7467527	333	transcript_id "cuff_1205"; gene_id "Cuff.1205"; gene_name "Cuff.1205"; locus "RLOC_00005804";
chr13	Cufflinks_novel	exon	7476316	7476412	96	transcript_id "cuff_1206"; gene_id "Cuff.1206"; gene_name "Cuff.1206"; locus "RLOC_00005805";
chr13	Cufflinks_novel	exon	7476585	7477151	566	transcript_id "cuff_1206"; gene_id "Cuff.1206"; gene_name "Cuff.1206"; locus "RLOC_00005805";
chr13	Cufflinks_novel	exon	7506787	7506814	27	transcript_id "cuff_1207"; gene_id "Cuff.1207"; gene_name "Cuff.1207"; locus "RLOC_00005806";
chr13	Cufflinks_novel	exon	7504955	7505165	210	transcript_id "cuff_1207"; gene_id "Cuff.1207"; gene_name "Cuff.1207"; locus "RLOC_00005806";
chr13	Cufflinks_novel	exon	12275287	12275569	282	transcript_id "cuff_1208"; gene_id "Cuff.1208"; gene_name "Cuff.1208"; locus "RLOC_00005818";
chr13	Cufflinks_novel	exon	12275764	12276237	473	transcript_id "cuff_1208"; gene_id "Cuff.1208"; gene_name "Cuff.1208"; locus "RLOC_00005818";
chr13	Cufflinks_novel	exon	13367409	13367543	134	transcript_id "cuff_1209"; gene_id "Cuff.1209"; gene_name "Cuff.1209"; locus "RLOC_00005829";
chr13	Cufflinks_novel	exon	13367666	13367853	187	transcript_id "cuff_1209"; gene_id "Cuff.1209"; gene_name "Cuff.1209"; locus "RLOC_00005829";
chr1	Cufflinks_novel	exon	54530157	54530184	27	transcript_id "cuff_121"; gene_id "Cuff.121"; gene_name "Cuff.121"; locus "RLOC_00000351";
chr1	Cufflinks_novel	exon	54533636	54533695	59	transcript_id "cuff_121"; gene_id "Cuff.121"; gene_name "Cuff.121"; locus "RLOC_00000351";
chr1	Cufflinks_novel	exon	54531569	54531646	77	transcript_id "cuff_121"; gene_id "Cuff.121"; gene_name "Cuff.121"; locus "RLOC_00000351";
chr13	Cufflinks_novel	exon	20255147	20255174	27	transcript_id "cuff_1210"; gene_id "Cuff.1210"; gene_name "Cuff.1210"; locus "RLOC_00005859";
chr13	Cufflinks_novel	exon	20254979	20255008	29	transcript_id "cuff_1210"; gene_id "Cuff.1210"; gene_name "Cuff.1210"; locus "RLOC_00005859";
chr13	Cufflinks_novel	exon	20255350	20255392	42	transcript_id "cuff_1210"; gene_id "Cuff.1210"; gene_name "Cuff.1210"; locus "RLOC_00005859";
chr13	Cufflinks_novel	exon	20256234	20256352	118	transcript_id "cuff_1210"; gene_id "Cuff.1210"; gene_name "Cuff.1210"; locus "RLOC_00005859";
chr13	Cufflinks_novel	exon	21250750	21250777	27	transcript_id "cuff_1211"; gene_id "Cuff.1211"; gene_name "Cuff.1211"; locus "RLOC_00005865";
chr13	Cufflinks_novel	exon	21251007	21251038	31	transcript_id "cuff_1211"; gene_id "Cuff.1211"; gene_name "Cuff.1211"; locus "RLOC_00005865";
chr13	Cufflinks_novel	exon	21250175	21250216	41	transcript_id "cuff_1211"; gene_id "Cuff.1211"; gene_name "Cuff.1211"; locus "RLOC_00005865";
chr13	Cufflinks_novel	exon	21250541	21250604	63	transcript_id "cuff_1211"; gene_id "Cuff.1211"; gene_name "Cuff.1211"; locus "RLOC_00005865";
chr13	Cufflinks_novel	exon	22032325	22032352	27	transcript_id "cuff_1212"; gene_id "Cuff.1212"; gene_name "Cuff.1212"; locus "RLOC_00005906";
chr13	Cufflinks_novel	exon	22032952	22032979	27	transcript_id "cuff_1212"; gene_id "Cuff.1212"; gene_name "Cuff.1212"; locus "RLOC_00005906";
chr13	Cufflinks_novel	exon	22072102	22072247	145	transcript_id "cuff_1213"; gene_id "Cuff.1213"; gene_name "Cuff.1213"; locus "RLOC_00005908";
chr13	Cufflinks_novel	exon	22071223	22071443	220	transcript_id "cuff_1213"; gene_id "Cuff.1213"; gene_name "Cuff.1213"; locus "RLOC_00005908";
chr13	Cufflinks_novel	exon	22766369	22766399	30	transcript_id "cuff_1214"; gene_id "Cuff.1214"; gene_name "Cuff.1214"; locus "RLOC_00005935";
chr13	Cufflinks_novel	exon	22766546	22766794	248	transcript_id "cuff_1214"; gene_id "Cuff.1214"; gene_name "Cuff.1214"; locus "RLOC_00005935";
chr13	Cufflinks_novel	exon	23376248	23376345	97	transcript_id "cuff_1215"; gene_id "Cuff.1215"; gene_name "Cuff.1215"; locus "RLOC_00005953";
chr13	Cufflinks_novel	exon	23377643	23378291	648	transcript_id "cuff_1215"; gene_id "Cuff.1215"; gene_name "Cuff.1215"; locus "RLOC_00005953";
chr13	Cufflinks_novel	exon	23391204	23391370	166	transcript_id "cuff_1216"; gene_id "Cuff.1216"; gene_name "Cuff.1216"; locus "RLOC_00005954";
chr13	Cufflinks_novel	exon	23390618	23390901	283	transcript_id "cuff_1216"; gene_id "Cuff.1216"; gene_name "Cuff.1216"; locus "RLOC_00005954";
chr13	Cufflinks_novel	exon	23391546	23392040	494	transcript_id "cuff_1216"; gene_id "Cuff.1216"; gene_name "Cuff.1216"; locus "RLOC_00005954";
chr13	Cufflinks_novel	exon	23401853	23401967	114	transcript_id "cuff_1217"; gene_id "Cuff.1217"; gene_name "Cuff.1217"; locus "RLOC_00005955";
chr13	Cufflinks_novel	exon	23398848	23398978	130	transcript_id "cuff_1217"; gene_id "Cuff.1217"; gene_name "Cuff.1217"; locus "RLOC_00005955";
chr13	Cufflinks_novel	exon	23405582	23405735	153	transcript_id "cuff_1217"; gene_id "Cuff.1217"; gene_name "Cuff.1217"; locus "RLOC_00005955";
chr13	Cufflinks_novel	exon	23399908	23400064	156	transcript_id "cuff_1217"; gene_id "Cuff.1217"; gene_name "Cuff.1217"; locus "RLOC_00005955";
chr13	Cufflinks_novel	exon	23399504	23399685	181	transcript_id "cuff_1217"; gene_id "Cuff.1217"; gene_name "Cuff.1217"; locus "RLOC_00005955";
chr13	Cufflinks_novel	exon	23403047	23403249	202	transcript_id "cuff_1217"; gene_id "Cuff.1217"; gene_name "Cuff.1217"; locus "RLOC_00005955";
chr13	Cufflinks_novel	exon	23405314	23405518	204	transcript_id "cuff_1217"; gene_id "Cuff.1217"; gene_name "Cuff.1217"; locus "RLOC_00005955";
chr13	Cufflinks_novel	exon	23401402	23401644	242	transcript_id "cuff_1217"; gene_id "Cuff.1217"; gene_name "Cuff.1217"; locus "RLOC_00005955";
chr13	Cufflinks_novel	exon	23404403	23404687	284	transcript_id "cuff_1217"; gene_id "Cuff.1217"; gene_name "Cuff.1217"; locus "RLOC_00005955";
chr13	Cufflinks_novel	exon	23404862	23405247	385	transcript_id "cuff_1217"; gene_id "Cuff.1217"; gene_name "Cuff.1217"; locus "RLOC_00005955";
chr13	Cufflinks_novel	exon	23409883	23409910	27	transcript_id "cuff_1218"; gene_id "Cuff.1218"; gene_name "Cuff.1218"; locus "RLOC_00005956";
chr13	Cufflinks_novel	exon	23411381	23411496	115	transcript_id "cuff_1218"; gene_id "Cuff.1218"; gene_name "Cuff.1218"; locus "RLOC_00005956";
chr13	Cufflinks_novel	exon	23410026	23410193	167	transcript_id "cuff_1218"; gene_id "Cuff.1218"; gene_name "Cuff.1218"; locus "RLOC_00005956";
chr13	Cufflinks_novel	exon	23412606	23412787	181	transcript_id "cuff_1218"; gene_id "Cuff.1218"; gene_name "Cuff.1218"; locus "RLOC_00005956";
chr13	Cufflinks_novel	exon	23415817	23415917	100	transcript_id "cuff_1219"; gene_id "Cuff.1219"; gene_name "Cuff.1219"; locus "RLOC_00005957";
chr13	Cufflinks_novel	exon	23415506	23415701	195	transcript_id "cuff_1219"; gene_id "Cuff.1219"; gene_name "Cuff.1219"; locus "RLOC_00005957";
chr1	Cufflinks_novel	exon	55291863	55291890	27	transcript_id "cuff_122"; gene_id "Cuff.122"; gene_name "Cuff.122"; locus "RLOC_00000360";
chr1	Cufflinks_novel	exon	55293824	55293885	61	transcript_id "cuff_122"; gene_id "Cuff.122"; gene_name "Cuff.122"; locus "RLOC_00000360";
chr1	Cufflinks_novel	exon	55293480	55293571	91	transcript_id "cuff_122"; gene_id "Cuff.122"; gene_name "Cuff.122"; locus "RLOC_00000360";
chr13	Cufflinks_novel	exon	23424902	23425046	144	transcript_id "cuff_1220"; gene_id "Cuff.1220"; gene_name "Cuff.1220"; locus "RLOC_00005958";
chr13	Cufflinks_novel	exon	23426830	23427038	208	transcript_id "cuff_1220"; gene_id "Cuff.1220"; gene_name "Cuff.1220"; locus "RLOC_00005958";
chr13	Cufflinks_novel	exon	23435722	23435860	138	transcript_id "cuff_1221"; gene_id "Cuff.1221"; gene_name "Cuff.1221"; locus "RLOC_00005959";
chr13	Cufflinks_novel	exon	23434671	23434860	189	transcript_id "cuff_1221"; gene_id "Cuff.1221"; gene_name "Cuff.1221"; locus "RLOC_00005959";
chr13	Cufflinks_novel	exon	23436030	23436479	449	transcript_id "cuff_1221"; gene_id "Cuff.1221"; gene_name "Cuff.1221"; locus "RLOC_00005959";
chr13	Cufflinks_novel	exon	23461285	23461312	27	transcript_id "cuff_1222"; gene_id "Cuff.1222"; gene_name "Cuff.1222"; locus "RLOC_00005961";
chr13	Cufflinks_novel	exon	23461368	23461395	27	transcript_id "cuff_1222"; gene_id "Cuff.1222"; gene_name "Cuff.1222"; locus "RLOC_00005961";
chr13	Cufflinks_novel	exon	23461928	23461955	27	transcript_id "cuff_1222"; gene_id "Cuff.1222"; gene_name "Cuff.1222"; locus "RLOC_00005961";
chr13	Cufflinks_novel	exon	23463676	23463745	69	transcript_id "cuff_1222"; gene_id "Cuff.1222"; gene_name "Cuff.1222"; locus "RLOC_00005961";
chr13	Cufflinks_novel	exon	23463170	23463302	132	transcript_id "cuff_1222"; gene_id "Cuff.1222"; gene_name "Cuff.1222"; locus "RLOC_00005961";
chr13	Cufflinks_novel	exon	23462395	23462558	163	transcript_id "cuff_1222"; gene_id "Cuff.1222"; gene_name "Cuff.1222"; locus "RLOC_00005961";
chr13	Cufflinks_novel	exon	23473183	23473210	27	transcript_id "cuff_1223"; gene_id "Cuff.1223"; gene_name "Cuff.1223"; locus "RLOC_00005962";
chr13	Cufflinks_novel	exon	23474514	23474541	27	transcript_id "cuff_1223"; gene_id "Cuff.1223"; gene_name "Cuff.1223"; locus "RLOC_00005962";
chr13	Cufflinks_novel	exon	23476050	23476166	116	transcript_id "cuff_1223"; gene_id "Cuff.1223"; gene_name "Cuff.1223"; locus "RLOC_00005962";
chr13	Cufflinks_novel	exon	23487584	23487611	27	transcript_id "cuff_1224"; gene_id "Cuff.1224"; gene_name "Cuff.1224"; locus "RLOC_00005963";
chr13	Cufflinks_novel	exon	23488351	23488439	88	transcript_id "cuff_1224"; gene_id "Cuff.1224"; gene_name "Cuff.1224"; locus "RLOC_00005963";
chr13	Cufflinks_novel	exon	23487932	23488300	368	transcript_id "cuff_1224"; gene_id "Cuff.1224"; gene_name "Cuff.1224"; locus "RLOC_00005963";
chr13	Cufflinks_novel	exon	23494165	23494228	63	transcript_id "cuff_1225"; gene_id "Cuff.1225"; gene_name "Cuff.1225"; locus "RLOC_00005964";
chr13	Cufflinks_novel	exon	23492003	23492373	370	transcript_id "cuff_1225"; gene_id "Cuff.1225"; gene_name "Cuff.1225"; locus "RLOC_00005964";
chr13	Cufflinks_novel	exon	23516513	23516540	27	transcript_id "cuff_1226"; gene_id "Cuff.1226"; gene_name "Cuff.1226"; locus "RLOC_00005966";
chr13	Cufflinks_novel	exon	23516812	23516990	178	transcript_id "cuff_1226"; gene_id "Cuff.1226"; gene_name "Cuff.1226"; locus "RLOC_00005966";
chr13	Cufflinks_novel	exon	24022617	24022644	27	transcript_id "cuff_1227"; gene_id "Cuff.1227"; gene_name "Cuff.1227"; locus "RLOC_00006004";
chr13	Cufflinks_novel	exon	24022202	24022545	343	transcript_id "cuff_1227"; gene_id "Cuff.1227"; gene_name "Cuff.1227"; locus "RLOC_00006004";
chr13	Cufflinks_novel	exon	24893079	24893106	27	transcript_id "cuff_1228"; gene_id "Cuff.1228"; gene_name "Cuff.1228"; locus "RLOC_00006013";
chr13	Cufflinks_novel	exon	24891719	24891808	89	transcript_id "cuff_1228"; gene_id "Cuff.1228"; gene_name "Cuff.1228"; locus "RLOC_00006013";
chr13	Cufflinks_novel	exon	24893168	24893286	118	transcript_id "cuff_1228"; gene_id "Cuff.1228"; gene_name "Cuff.1228"; locus "RLOC_00006013";
chr13	Cufflinks_novel	exon	24891865	24892531	666	transcript_id "cuff_1228"; gene_id "Cuff.1228"; gene_name "Cuff.1228"; locus "RLOC_00006013";
chr13	Cufflinks_novel	exon	26374430	26374457	27	transcript_id "cuff_1229"; gene_id "Cuff.1229"; gene_name "Cuff.1229"; locus "RLOC_00006024";
chr13	Cufflinks_novel	exon	26375954	26375981	27	transcript_id "cuff_1229"; gene_id "Cuff.1229"; gene_name "Cuff.1229"; locus "RLOC_00006024";
chr13	Cufflinks_novel	exon	26375473	26375844	371	transcript_id "cuff_1229"; gene_id "Cuff.1229"; gene_name "Cuff.1229"; locus "RLOC_00006024";
chr1	Cufflinks_novel	exon	55302001	55302028	27	transcript_id "cuff_123"; gene_id "Cuff.123"; gene_name "Cuff.123"; locus "RLOC_00000362";
chr1	Cufflinks_novel	exon	55303457	55303495	38	transcript_id "cuff_123"; gene_id "Cuff.123"; gene_name "Cuff.123"; locus "RLOC_00000362";
chr1	Cufflinks_novel	exon	55302798	55302883	85	transcript_id "cuff_123"; gene_id "Cuff.123"; gene_name "Cuff.123"; locus "RLOC_00000362";
chr1	Cufflinks_novel	exon	55303292	55303383	91	transcript_id "cuff_123"; gene_id "Cuff.123"; gene_name "Cuff.123"; locus "RLOC_00000362";
chr1	Cufflinks_novel	exon	55300145	55300267	122	transcript_id "cuff_123"; gene_id "Cuff.123"; gene_name "Cuff.123"; locus "RLOC_00000362";
chr1	Cufflinks_novel	exon	55303815	55303942	127	transcript_id "cuff_123"; gene_id "Cuff.123"; gene_name "Cuff.123"; locus "RLOC_00000362";
chr1	Cufflinks_novel	exon	55305580	55305731	151	transcript_id "cuff_123"; gene_id "Cuff.123"; gene_name "Cuff.123"; locus "RLOC_00000362";
chr1	Cufflinks_novel	exon	55304748	55304901	153	transcript_id "cuff_123"; gene_id "Cuff.123"; gene_name "Cuff.123"; locus "RLOC_00000362";
chr1	Cufflinks_novel	exon	55304059	55304249	190	transcript_id "cuff_123"; gene_id "Cuff.123"; gene_name "Cuff.123"; locus "RLOC_00000362";
chr1	Cufflinks_novel	exon	55305291	55305517	226	transcript_id "cuff_123"; gene_id "Cuff.123"; gene_name "Cuff.123"; locus "RLOC_00000362";
chr13	Cufflinks_novel	exon	28966083	28966110	27	transcript_id "cuff_1230"; gene_id "Cuff.1230"; gene_name "Cuff.1230"; locus "RLOC_00006049";
chr13	Cufflinks_novel	exon	28966368	28966517	149	transcript_id "cuff_1230"; gene_id "Cuff.1230"; gene_name "Cuff.1230"; locus "RLOC_00006049";
chr13	Cufflinks_novel	exon	31332460	31332487	27	transcript_id "cuff_1231"; gene_id "Cuff.1231"; gene_name "Cuff.1231"; locus "RLOC_00006060";
chr13	Cufflinks_novel	exon	31332911	31332938	27	transcript_id "cuff_1231"; gene_id "Cuff.1231"; gene_name "Cuff.1231"; locus "RLOC_00006060";
chr13	Cufflinks_novel	exon	33093209	33093462	253	transcript_id "cuff_1232"; gene_id "Cuff.1232"; gene_name "Cuff.1232"; locus "RLOC_00006071";
chr13	Cufflinks_novel	exon	33092744	33093019	275	transcript_id "cuff_1232"; gene_id "Cuff.1232"; gene_name "Cuff.1232"; locus "RLOC_00006071";
chr13	Cufflinks_novel	exon	33095159	33095473	314	transcript_id "cuff_1232"; gene_id "Cuff.1232"; gene_name "Cuff.1232"; locus "RLOC_00006071";
chr13	Cufflinks_novel	exon	33227209	33227265	56	transcript_id "cuff_1233"; gene_id "Cuff.1233"; gene_name "Cuff.1233"; locus "RLOC_00006075";
chr13	Cufflinks_novel	exon	33225391	33225457	66	transcript_id "cuff_1233"; gene_id "Cuff.1233"; gene_name "Cuff.1233"; locus "RLOC_00006075";
chr13	Cufflinks_novel	exon	33229333	33229457	124	transcript_id "cuff_1233"; gene_id "Cuff.1233"; gene_name "Cuff.1233"; locus "RLOC_00006075";
chr13	Cufflinks_novel	exon	33228782	33228984	202	transcript_id "cuff_1233"; gene_id "Cuff.1233"; gene_name "Cuff.1233"; locus "RLOC_00006075";
chr13	Cufflinks_novel	exon	33226857	33227091	234	transcript_id "cuff_1233"; gene_id "Cuff.1233"; gene_name "Cuff.1233"; locus "RLOC_00006075";
chr13	Cufflinks_novel	exon	33660010	33660080	70	transcript_id "cuff_1234"; gene_id "Cuff.1234"; gene_name "Cuff.1234"; locus "RLOC_00006081";
chr13	Cufflinks_novel	exon	33660510	33660606	96	transcript_id "cuff_1234"; gene_id "Cuff.1234"; gene_name "Cuff.1234"; locus "RLOC_00006081";
chr13	Cufflinks_novel	exon	33660147	33660384	237	transcript_id "cuff_1234"; gene_id "Cuff.1234"; gene_name "Cuff.1234"; locus "RLOC_00006081";
chr13	Cufflinks_novel	exon	34176237	34176298	61	transcript_id "cuff_1235"; gene_id "Cuff.1235"; gene_name "Cuff.1235"; locus "RLOC_00006090";
chr13	Cufflinks_novel	exon	34174424	34174527	103	transcript_id "cuff_1235"; gene_id "Cuff.1235"; gene_name "Cuff.1235"; locus "RLOC_00006090";
chr13	Cufflinks_novel	exon	34176387	34176516	129	transcript_id "cuff_1235"; gene_id "Cuff.1235"; gene_name "Cuff.1235"; locus "RLOC_00006090";
chr13	Cufflinks_novel	exon	34203627	34203656	29	transcript_id "cuff_1236"; gene_id "Cuff.1236"; gene_name "Cuff.1236"; locus "RLOC_00006091";
chr13	Cufflinks_novel	exon	34202916	34203065	149	transcript_id "cuff_1236"; gene_id "Cuff.1236"; gene_name "Cuff.1236"; locus "RLOC_00006091";
chr13	Cufflinks_novel	exon	34746525	34746635	110	transcript_id "cuff_1237"; gene_id "Cuff.1237"; gene_name "Cuff.1237"; locus "RLOC_00006096";
chr13	Cufflinks_novel	exon	34747905	34748091	186	transcript_id "cuff_1237"; gene_id "Cuff.1237"; gene_name "Cuff.1237"; locus "RLOC_00006096";
chr13	Cufflinks_novel	exon	34745062	34745311	249	transcript_id "cuff_1237"; gene_id "Cuff.1237"; gene_name "Cuff.1237"; locus "RLOC_00006096";
chr13	Cufflinks_novel	exon	34751505	34751620	115	transcript_id "cuff_1238"; gene_id "Cuff.1238"; gene_name "Cuff.1238"; locus "RLOC_00006097";
chr13	Cufflinks_novel	exon	34752163	34752405	242	transcript_id "cuff_1238"; gene_id "Cuff.1238"; gene_name "Cuff.1238"; locus "RLOC_00006097";
chr13	Cufflinks_novel	exon	34758647	34758755	108	transcript_id "cuff_1239"; gene_id "Cuff.1239"; gene_name "Cuff.1239"; locus "RLOC_00006098";
chr13	Cufflinks_novel	exon	34758827	34758986	159	transcript_id "cuff_1239"; gene_id "Cuff.1239"; gene_name "Cuff.1239"; locus "RLOC_00006098";
chr1	Cufflinks_novel	exon	55326478	55326533	55	transcript_id "cuff_124"; gene_id "Cuff.124"; gene_name "Cuff.124"; locus "RLOC_00000363";
chr1	Cufflinks_novel	exon	55326252	55326397	145	transcript_id "cuff_124"; gene_id "Cuff.124"; gene_name "Cuff.124"; locus "RLOC_00000363";
chr1	Cufflinks_novel	exon	55324744	55324903	159	transcript_id "cuff_124"; gene_id "Cuff.124"; gene_name "Cuff.124"; locus "RLOC_00000363";
chr1	Cufflinks_novel	exon	55327234	55327541	307	transcript_id "cuff_124"; gene_id "Cuff.124"; gene_name "Cuff.124"; locus "RLOC_00000363";
chr13	Cufflinks_novel	exon	35257911	35257939	28	transcript_id "cuff_1240"; gene_id "Cuff.1240"; gene_name "Cuff.1240"; locus "RLOC_00006105";
chr13	Cufflinks_novel	exon	35259523	35259614	91	transcript_id "cuff_1240"; gene_id "Cuff.1240"; gene_name "Cuff.1240"; locus "RLOC_00006105";
chr13	Cufflinks_novel	exon	35257504	35257635	131	transcript_id "cuff_1240"; gene_id "Cuff.1240"; gene_name "Cuff.1240"; locus "RLOC_00006105";
chr13	Cufflinks_novel	exon	35258868	35259048	180	transcript_id "cuff_1240"; gene_id "Cuff.1240"; gene_name "Cuff.1240"; locus "RLOC_00006105";
chr13	Cufflinks_novel	exon	35277991	35278018	27	transcript_id "cuff_1241"; gene_id "Cuff.1241"; gene_name "Cuff.1241"; locus "RLOC_00006106";
chr13	Cufflinks_novel	exon	35279443	35279695	252	transcript_id "cuff_1241"; gene_id "Cuff.1241"; gene_name "Cuff.1241"; locus "RLOC_00006106";
chr13	Cufflinks_novel	exon	36675244	36675285	41	transcript_id "cuff_1242"; gene_id "Cuff.1242"; gene_name "Cuff.1242"; locus "RLOC_00006112";
chr13	Cufflinks_novel	exon	36674765	36674854	89	transcript_id "cuff_1242"; gene_id "Cuff.1242"; gene_name "Cuff.1242"; locus "RLOC_00006112";
chr13	Cufflinks_novel	exon	36674118	36674274	156	transcript_id "cuff_1242"; gene_id "Cuff.1242"; gene_name "Cuff.1242"; locus "RLOC_00006112";
chr13	Cufflinks_novel	exon	36674401	36674681	280	transcript_id "cuff_1242"; gene_id "Cuff.1242"; gene_name "Cuff.1242"; locus "RLOC_00006112";
chr13	Cufflinks_novel	exon	36811537	36811564	27	transcript_id "cuff_1243"; gene_id "Cuff.1243"; gene_name "Cuff.1243"; locus "RLOC_00006113";
chr13	Cufflinks_novel	exon	36810115	36810183	68	transcript_id "cuff_1243"; gene_id "Cuff.1243"; gene_name "Cuff.1243"; locus "RLOC_00006113";
chr13	Cufflinks_novel	exon	36807670	36807750	80	transcript_id "cuff_1243"; gene_id "Cuff.1243"; gene_name "Cuff.1243"; locus "RLOC_00006113";
chr13	Cufflinks_novel	exon	36808073	36808154	81	transcript_id "cuff_1243"; gene_id "Cuff.1243"; gene_name "Cuff.1243"; locus "RLOC_00006113";
chr13	Cufflinks_novel	exon	36812485	36812645	160	transcript_id "cuff_1243"; gene_id "Cuff.1243"; gene_name "Cuff.1243"; locus "RLOC_00006113";
chr13	Cufflinks_novel	exon	36811264	36811430	166	transcript_id "cuff_1243"; gene_id "Cuff.1243"; gene_name "Cuff.1243"; locus "RLOC_00006113";
chr13	Cufflinks_novel	exon	36806072	36806288	216	transcript_id "cuff_1243"; gene_id "Cuff.1243"; gene_name "Cuff.1243"; locus "RLOC_00006113";
chr13	Cufflinks_novel	exon	36809640	36809931	291	transcript_id "cuff_1243"; gene_id "Cuff.1243"; gene_name "Cuff.1243"; locus "RLOC_00006113";
chr13	Cufflinks_novel	exon	37783961	37783994	33	transcript_id "cuff_1244"; gene_id "Cuff.1244"; gene_name "Cuff.1244"; locus "RLOC_00006117";
chr13	Cufflinks_novel	exon	37779705	37779771	66	transcript_id "cuff_1244"; gene_id "Cuff.1244"; gene_name "Cuff.1244"; locus "RLOC_00006117";
chr13	Cufflinks_novel	exon	37775017	37775120	103	transcript_id "cuff_1244"; gene_id "Cuff.1244"; gene_name "Cuff.1244"; locus "RLOC_00006117";
chr13	Cufflinks_novel	exon	37783476	37783678	202	transcript_id "cuff_1244"; gene_id "Cuff.1244"; gene_name "Cuff.1244"; locus "RLOC_00006117";
chr13	Cufflinks_novel	exon	37781408	37781626	218	transcript_id "cuff_1244"; gene_id "Cuff.1244"; gene_name "Cuff.1244"; locus "RLOC_00006117";
chr13	Cufflinks_novel	exon	37776608	37776940	332	transcript_id "cuff_1244"; gene_id "Cuff.1244"; gene_name "Cuff.1244"; locus "RLOC_00006117";
chr13	Cufflinks_novel	exon	37777903	37778248	345	transcript_id "cuff_1244"; gene_id "Cuff.1244"; gene_name "Cuff.1244"; locus "RLOC_00006117";
chr13	Cufflinks_novel	exon	37787949	37787976	27	transcript_id "cuff_1245"; gene_id "Cuff.1245"; gene_name "Cuff.1245"; locus "RLOC_00006118";
chr13	Cufflinks_novel	exon	37794570	37794597	27	transcript_id "cuff_1245"; gene_id "Cuff.1245"; gene_name "Cuff.1245"; locus "RLOC_00006118";
chr13	Cufflinks_novel	exon	37802057	37802101	44	transcript_id "cuff_1245"; gene_id "Cuff.1245"; gene_name "Cuff.1245"; locus "RLOC_00006118";
chr13	Cufflinks_novel	exon	37797158	37797220	62	transcript_id "cuff_1245"; gene_id "Cuff.1245"; gene_name "Cuff.1245"; locus "RLOC_00006118";
chr13	Cufflinks_novel	exon	37802877	37802942	65	transcript_id "cuff_1245"; gene_id "Cuff.1245"; gene_name "Cuff.1245"; locus "RLOC_00006118";
chr13	Cufflinks_novel	exon	37807076	37807151	75	transcript_id "cuff_1245"; gene_id "Cuff.1245"; gene_name "Cuff.1245"; locus "RLOC_00006118";
chr13	Cufflinks_novel	exon	37790879	37790983	104	transcript_id "cuff_1245"; gene_id "Cuff.1245"; gene_name "Cuff.1245"; locus "RLOC_00006118";
chr13	Cufflinks_novel	exon	37790088	37790195	107	transcript_id "cuff_1245"; gene_id "Cuff.1245"; gene_name "Cuff.1245"; locus "RLOC_00006118";
chr13	Cufflinks_novel	exon	37799109	37799224	115	transcript_id "cuff_1245"; gene_id "Cuff.1245"; gene_name "Cuff.1245"; locus "RLOC_00006118";
chr13	Cufflinks_novel	exon	37799657	37799776	119	transcript_id "cuff_1245"; gene_id "Cuff.1245"; gene_name "Cuff.1245"; locus "RLOC_00006118";
chr13	Cufflinks_novel	exon	37807658	37807793	135	transcript_id "cuff_1245"; gene_id "Cuff.1245"; gene_name "Cuff.1245"; locus "RLOC_00006118";
chr13	Cufflinks_novel	exon	37795975	37796119	144	transcript_id "cuff_1245"; gene_id "Cuff.1245"; gene_name "Cuff.1245"; locus "RLOC_00006118";
chr13	Cufflinks_novel	exon	37791954	37792116	162	transcript_id "cuff_1245"; gene_id "Cuff.1245"; gene_name "Cuff.1245"; locus "RLOC_00006118";
chr13	Cufflinks_novel	exon	37792766	37792928	162	transcript_id "cuff_1245"; gene_id "Cuff.1245"; gene_name "Cuff.1245"; locus "RLOC_00006118";
chr13	Cufflinks_novel	exon	37795498	37795668	170	transcript_id "cuff_1245"; gene_id "Cuff.1245"; gene_name "Cuff.1245"; locus "RLOC_00006118";
chr13	Cufflinks_novel	exon	37803850	37804055	205	transcript_id "cuff_1245"; gene_id "Cuff.1245"; gene_name "Cuff.1245"; locus "RLOC_00006118";
chr13	Cufflinks_novel	exon	37796172	37796384	212	transcript_id "cuff_1245"; gene_id "Cuff.1245"; gene_name "Cuff.1245"; locus "RLOC_00006118";
chr13	Cufflinks_novel	exon	37801407	37801649	242	transcript_id "cuff_1245"; gene_id "Cuff.1245"; gene_name "Cuff.1245"; locus "RLOC_00006118";
chr13	Cufflinks_novel	exon	37788242	37788485	243	transcript_id "cuff_1245"; gene_id "Cuff.1245"; gene_name "Cuff.1245"; locus "RLOC_00006118";
chr13	Cufflinks_novel	exon	37794707	37794975	268	transcript_id "cuff_1245"; gene_id "Cuff.1245"; gene_name "Cuff.1245"; locus "RLOC_00006118";
chr13	Cufflinks_novel	exon	37794101	37794409	308	transcript_id "cuff_1245"; gene_id "Cuff.1245"; gene_name "Cuff.1245"; locus "RLOC_00006118";
chr13	Cufflinks_novel	exon	37803045	37803391	346	transcript_id "cuff_1245"; gene_id "Cuff.1245"; gene_name "Cuff.1245"; locus "RLOC_00006118";
chr13	Cufflinks_novel	exon	37796590	37796960	370	transcript_id "cuff_1245"; gene_id "Cuff.1245"; gene_name "Cuff.1245"; locus "RLOC_00006118";
chr13	Cufflinks_novel	exon	37800164	37800549	385	transcript_id "cuff_1245"; gene_id "Cuff.1245"; gene_name "Cuff.1245"; locus "RLOC_00006118";
chr13	Cufflinks_novel	exon	37806005	37806420	415	transcript_id "cuff_1245"; gene_id "Cuff.1245"; gene_name "Cuff.1245"; locus "RLOC_00006118";
chr13	Cufflinks_novel	exon	37808306	37808737	431	transcript_id "cuff_1245"; gene_id "Cuff.1245"; gene_name "Cuff.1245"; locus "RLOC_00006118";
chr13	Cufflinks_novel	exon	37812529	37812597	68	transcript_id "cuff_1246"; gene_id "Cuff.1246"; gene_name "Cuff.1246"; locus "RLOC_00006119";
chr13	Cufflinks_novel	exon	37813948	37814087	139	transcript_id "cuff_1246"; gene_id "Cuff.1246"; gene_name "Cuff.1246"; locus "RLOC_00006119";
chr13	Cufflinks_novel	exon	37820958	37820991	33	transcript_id "cuff_1247"; gene_id "Cuff.1247"; gene_name "Cuff.1247"; locus "RLOC_00006120";
chr13	Cufflinks_novel	exon	37822883	37822971	88	transcript_id "cuff_1247"; gene_id "Cuff.1247"; gene_name "Cuff.1247"; locus "RLOC_00006120";
chr13	Cufflinks_novel	exon	37821152	37821296	144	transcript_id "cuff_1247"; gene_id "Cuff.1247"; gene_name "Cuff.1247"; locus "RLOC_00006120";
chr13	Cufflinks_novel	exon	37820264	37820466	202	transcript_id "cuff_1247"; gene_id "Cuff.1247"; gene_name "Cuff.1247"; locus "RLOC_00006120";
chr13	Cufflinks_novel	exon	37821474	37822108	634	transcript_id "cuff_1247"; gene_id "Cuff.1247"; gene_name "Cuff.1247"; locus "RLOC_00006120";
chr13	Cufflinks_novel	exon	41344015	41344042	27	transcript_id "cuff_1248"; gene_id "Cuff.1248"; gene_name "Cuff.1248"; locus "RLOC_00006140";
chr13	Cufflinks_novel	exon	41344750	41344781	31	transcript_id "cuff_1248"; gene_id "Cuff.1248"; gene_name "Cuff.1248"; locus "RLOC_00006140";
chr13	Cufflinks_novel	exon	41344850	41345005	155	transcript_id "cuff_1248"; gene_id "Cuff.1248"; gene_name "Cuff.1248"; locus "RLOC_00006140";
chr13	Cufflinks_novel	exon	41343129	41343333	204	transcript_id "cuff_1248"; gene_id "Cuff.1248"; gene_name "Cuff.1248"; locus "RLOC_00006140";
chr13	Cufflinks_novel	exon	41344129	41344495	366	transcript_id "cuff_1248"; gene_id "Cuff.1248"; gene_name "Cuff.1248"; locus "RLOC_00006140";
chr13	Cufflinks_novel	exon	42143054	42143081	27	transcript_id "cuff_1249"; gene_id "Cuff.1249"; gene_name "Cuff.1249"; locus "RLOC_00006147";
chr13	Cufflinks_novel	exon	42144292	42144319	27	transcript_id "cuff_1249"; gene_id "Cuff.1249"; gene_name "Cuff.1249"; locus "RLOC_00006147";
chr13	Cufflinks_novel	exon	42145643	42145670	27	transcript_id "cuff_1249"; gene_id "Cuff.1249"; gene_name "Cuff.1249"; locus "RLOC_00006147";
chr1	Cufflinks_novel	exon	55333477	55333541	64	transcript_id "cuff_125"; gene_id "Cuff.125"; gene_name "Cuff.125"; locus "RLOC_00000364";
chr1	Cufflinks_novel	exon	55332186	55332367	181	transcript_id "cuff_125"; gene_id "Cuff.125"; gene_name "Cuff.125"; locus "RLOC_00000364";
chr13	Cufflinks_novel	exon	42429911	42429938	27	transcript_id "cuff_1250"; gene_id "Cuff.1250"; gene_name "Cuff.1250"; locus "RLOC_00006150";
chr13	Cufflinks_novel	exon	42431886	42432013	127	transcript_id "cuff_1250"; gene_id "Cuff.1250"; gene_name "Cuff.1250"; locus "RLOC_00006150";
chr13	Cufflinks_novel	exon	42431487	42431734	247	transcript_id "cuff_1250"; gene_id "Cuff.1250"; gene_name "Cuff.1250"; locus "RLOC_00006150";
chr13	Cufflinks_novel	exon	44018853	44018880	27	transcript_id "cuff_1251"; gene_id "Cuff.1251"; gene_name "Cuff.1251"; locus "RLOC_00006160";
chr13	Cufflinks_novel	exon	44018535	44018644	109	transcript_id "cuff_1251"; gene_id "Cuff.1251"; gene_name "Cuff.1251"; locus "RLOC_00006160";
chr13	Cufflinks_novel	exon	44287386	44287414	28	transcript_id "cuff_1252"; gene_id "Cuff.1252"; gene_name "Cuff.1252"; locus "RLOC_00006161";
chr13	Cufflinks_novel	exon	44288686	44288864	178	transcript_id "cuff_1252"; gene_id "Cuff.1252"; gene_name "Cuff.1252"; locus "RLOC_00006161";
chr13	Cufflinks_novel	exon	47103677	47103704	27	transcript_id "cuff_1253"; gene_id "Cuff.1253"; gene_name "Cuff.1253"; locus "RLOC_00006173";
chr13	Cufflinks_novel	exon	47104994	47105021	27	transcript_id "cuff_1253"; gene_id "Cuff.1253"; gene_name "Cuff.1253"; locus "RLOC_00006173";
chr13	Cufflinks_novel	exon	47203357	47203476	119	transcript_id "cuff_1254"; gene_id "Cuff.1254"; gene_name "Cuff.1254"; locus "RLOC_00006178";
chr13	Cufflinks_novel	exon	47203002	47203157	155	transcript_id "cuff_1254"; gene_id "Cuff.1254"; gene_name "Cuff.1254"; locus "RLOC_00006178";
chr13	Cufflinks_novel	exon	47206728	47206810	82	transcript_id "cuff_1255"; gene_id "Cuff.1255"; gene_name "Cuff.1255"; locus "RLOC_00006179";
chr13	Cufflinks_novel	exon	47207159	47207325	166	transcript_id "cuff_1255"; gene_id "Cuff.1255"; gene_name "Cuff.1255"; locus "RLOC_00006179";
chr13	Cufflinks_novel	exon	47205978	47206157	179	transcript_id "cuff_1255"; gene_id "Cuff.1255"; gene_name "Cuff.1255"; locus "RLOC_00006179";
chr13	Cufflinks_novel	exon	47380767	47380832	65	transcript_id "cuff_1256"; gene_id "Cuff.1256"; gene_name "Cuff.1256"; locus "RLOC_00006181";
chr13	Cufflinks_novel	exon	47382727	47382792	65	transcript_id "cuff_1256"; gene_id "Cuff.1256"; gene_name "Cuff.1256"; locus "RLOC_00006181";
chr13	Cufflinks_novel	exon	47432881	47432908	27	transcript_id "cuff_1257"; gene_id "Cuff.1257"; gene_name "Cuff.1257"; locus "RLOC_00006182";
chr13	Cufflinks_novel	exon	47434016	47434104	88	transcript_id "cuff_1257"; gene_id "Cuff.1257"; gene_name "Cuff.1257"; locus "RLOC_00006182";
chr13	Cufflinks_novel	exon	47535250	47535368	118	transcript_id "cuff_1258"; gene_id "Cuff.1258"; gene_name "Cuff.1258"; locus "RLOC_00006183";
chr13	Cufflinks_novel	exon	47534959	47535124	165	transcript_id "cuff_1258"; gene_id "Cuff.1258"; gene_name "Cuff.1258"; locus "RLOC_00006183";
chr13	Cufflinks_novel	exon	48028437	48028464	27	transcript_id "cuff_1259"; gene_id "Cuff.1259"; gene_name "Cuff.1259"; locus "RLOC_00006184";
chr13	Cufflinks_novel	exon	48027060	48027167	107	transcript_id "cuff_1259"; gene_id "Cuff.1259"; gene_name "Cuff.1259"; locus "RLOC_00006184";
chr1	Cufflinks_novel	exon	55337047	55337303	256	transcript_id "cuff_126"; gene_id "Cuff.126"; gene_name "Cuff.126"; locus "RLOC_00000365";
chr1	Cufflinks_novel	exon	55337492	55337814	322	transcript_id "cuff_126"; gene_id "Cuff.126"; gene_name "Cuff.126"; locus "RLOC_00000365";
chr13	Cufflinks_novel	exon	48633898	48634017	119	transcript_id "cuff_1260"; gene_id "Cuff.1260"; gene_name "Cuff.1260"; locus "RLOC_00006190";
chr13	Cufflinks_novel	exon	48637751	48637918	167	transcript_id "cuff_1260"; gene_id "Cuff.1260"; gene_name "Cuff.1260"; locus "RLOC_00006190";
chr13	Cufflinks_novel	exon	48635973	48636184	211	transcript_id "cuff_1260"; gene_id "Cuff.1260"; gene_name "Cuff.1260"; locus "RLOC_00006190";
chr13	Cufflinks_novel	exon	48637182	48637602	420	transcript_id "cuff_1260"; gene_id "Cuff.1260"; gene_name "Cuff.1260"; locus "RLOC_00006190";
chr13	Cufflinks_novel	exon	48642205	48642324	119	transcript_id "cuff_1261"; gene_id "Cuff.1261"; gene_name "Cuff.1261"; locus "RLOC_00006191";
chr13	Cufflinks_novel	exon	48639995	48640143	148	transcript_id "cuff_1261"; gene_id "Cuff.1261"; gene_name "Cuff.1261"; locus "RLOC_00006191";
chr13	Cufflinks_novel	exon	48640620	48640808	188	transcript_id "cuff_1261"; gene_id "Cuff.1261"; gene_name "Cuff.1261"; locus "RLOC_00006191";
chr13	Cufflinks_novel	exon	49861245	49861298	53	transcript_id "cuff_1262"; gene_id "Cuff.1262"; gene_name "Cuff.1262"; locus "RLOC_00006211";
chr13	Cufflinks_novel	exon	49857861	49858024	163	transcript_id "cuff_1262"; gene_id "Cuff.1262"; gene_name "Cuff.1262"; locus "RLOC_00006211";
chr13	Cufflinks_novel	exon	49859496	49859710	214	transcript_id "cuff_1262"; gene_id "Cuff.1262"; gene_name "Cuff.1262"; locus "RLOC_00006211";
chr13	Cufflinks_novel	exon	49860750	49861150	400	transcript_id "cuff_1262"; gene_id "Cuff.1262"; gene_name "Cuff.1262"; locus "RLOC_00006211";
chr13	Cufflinks_novel	exon	49859810	49860440	630	transcript_id "cuff_1262"; gene_id "Cuff.1262"; gene_name "Cuff.1262"; locus "RLOC_00006211";
chr13	Cufflinks_novel	exon	49865872	49866014	142	transcript_id "cuff_1263"; gene_id "Cuff.1263"; gene_name "Cuff.1263"; locus "RLOC_00006212";
chr13	Cufflinks_novel	exon	49865535	49865796	261	transcript_id "cuff_1263"; gene_id "Cuff.1263"; gene_name "Cuff.1263"; locus "RLOC_00006212";
chr13	Cufflinks_novel	exon	49874742	49874827	85	transcript_id "cuff_1264"; gene_id "Cuff.1264"; gene_name "Cuff.1264"; locus "RLOC_00006213";
chr13	Cufflinks_novel	exon	49875512	49875732	220	transcript_id "cuff_1264"; gene_id "Cuff.1264"; gene_name "Cuff.1264"; locus "RLOC_00006213";
chr13	Cufflinks_novel	exon	49884369	49884396	27	transcript_id "cuff_1265"; gene_id "Cuff.1265"; gene_name "Cuff.1265"; locus "RLOC_00006214";
chr13	Cufflinks_novel	exon	49887454	49887481	27	transcript_id "cuff_1265"; gene_id "Cuff.1265"; gene_name "Cuff.1265"; locus "RLOC_00006214";
chr13	Cufflinks_novel	exon	49887635	49887665	30	transcript_id "cuff_1265"; gene_id "Cuff.1265"; gene_name "Cuff.1265"; locus "RLOC_00006214";
chr13	Cufflinks_novel	exon	49884166	49884208	42	transcript_id "cuff_1265"; gene_id "Cuff.1265"; gene_name "Cuff.1265"; locus "RLOC_00006214";
chr13	Cufflinks_novel	exon	49879202	49879321	119	transcript_id "cuff_1265"; gene_id "Cuff.1265"; gene_name "Cuff.1265"; locus "RLOC_00006214";
chr13	Cufflinks_novel	exon	49880290	49880419	129	transcript_id "cuff_1265"; gene_id "Cuff.1265"; gene_name "Cuff.1265"; locus "RLOC_00006214";
chr13	Cufflinks_novel	exon	49879433	49879577	144	transcript_id "cuff_1265"; gene_id "Cuff.1265"; gene_name "Cuff.1265"; locus "RLOC_00006214";
chr13	Cufflinks_novel	exon	49879637	49879803	166	transcript_id "cuff_1265"; gene_id "Cuff.1265"; gene_name "Cuff.1265"; locus "RLOC_00006214";
chr13	Cufflinks_novel	exon	49883711	49883924	213	transcript_id "cuff_1265"; gene_id "Cuff.1265"; gene_name "Cuff.1265"; locus "RLOC_00006214";
chr13	Cufflinks_novel	exon	49879928	49880233	305	transcript_id "cuff_1265"; gene_id "Cuff.1265"; gene_name "Cuff.1265"; locus "RLOC_00006214";
chr13	Cufflinks_novel	exon	49885320	49885681	361	transcript_id "cuff_1265"; gene_id "Cuff.1265"; gene_name "Cuff.1265"; locus "RLOC_00006214";
chr13	Cufflinks_novel	exon	49882818	49883447	629	transcript_id "cuff_1265"; gene_id "Cuff.1265"; gene_name "Cuff.1265"; locus "RLOC_00006214";
chr13	Cufflinks_novel	exon	49880471	49882750	2279	transcript_id "cuff_1265"; gene_id "Cuff.1265"; gene_name "Cuff.1265"; locus "RLOC_00006214";
chr13	Cufflinks_novel	exon	49892686	49892713	27	transcript_id "cuff_1266"; gene_id "Cuff.1266"; gene_name "Cuff.1266"; locus "RLOC_00006215";
chr13	Cufflinks_novel	exon	49894262	49894326	64	transcript_id "cuff_1266"; gene_id "Cuff.1266"; gene_name "Cuff.1266"; locus "RLOC_00006215";
chr13	Cufflinks_novel	exon	49892389	49892491	102	transcript_id "cuff_1266"; gene_id "Cuff.1266"; gene_name "Cuff.1266"; locus "RLOC_00006215";
chr13	Cufflinks_novel	exon	49910116	49910238	122	transcript_id "cuff_1267"; gene_id "Cuff.1267"; gene_name "Cuff.1267"; locus "RLOC_00006216";
chr13	Cufflinks_novel	exon	49910461	49910656	195	transcript_id "cuff_1267"; gene_id "Cuff.1267"; gene_name "Cuff.1267"; locus "RLOC_00006216";
chr13	Cufflinks_novel	exon	49915964	49916033	69	transcript_id "cuff_1268"; gene_id "Cuff.1268"; gene_name "Cuff.1268"; locus "RLOC_00006217";
chr13	Cufflinks_novel	exon	49922529	49922634	105	transcript_id "cuff_1268"; gene_id "Cuff.1268"; gene_name "Cuff.1268"; locus "RLOC_00006217";
chr13	Cufflinks_novel	exon	49919917	49920053	136	transcript_id "cuff_1268"; gene_id "Cuff.1268"; gene_name "Cuff.1268"; locus "RLOC_00006217";
chr13	Cufflinks_novel	exon	49916300	49916437	137	transcript_id "cuff_1268"; gene_id "Cuff.1268"; gene_name "Cuff.1268"; locus "RLOC_00006217";
chr13	Cufflinks_novel	exon	49916085	49916246	161	transcript_id "cuff_1268"; gene_id "Cuff.1268"; gene_name "Cuff.1268"; locus "RLOC_00006217";
chr13	Cufflinks_novel	exon	49921744	49922011	267	transcript_id "cuff_1268"; gene_id "Cuff.1268"; gene_name "Cuff.1268"; locus "RLOC_00006217";
chr13	Cufflinks_novel	exon	49922083	49922352	269	transcript_id "cuff_1268"; gene_id "Cuff.1268"; gene_name "Cuff.1268"; locus "RLOC_00006217";
chr13	Cufflinks_novel	exon	49916497	49916906	409	transcript_id "cuff_1268"; gene_id "Cuff.1268"; gene_name "Cuff.1268"; locus "RLOC_00006217";
chr13	Cufflinks_novel	exon	49919038	49919454	416	transcript_id "cuff_1268"; gene_id "Cuff.1268"; gene_name "Cuff.1268"; locus "RLOC_00006217";
chr13	Cufflinks_novel	exon	49917048	49918950	1902	transcript_id "cuff_1268"; gene_id "Cuff.1268"; gene_name "Cuff.1268"; locus "RLOC_00006217";
chr13	Cufflinks_novel	exon	49926975	49927149	174	transcript_id "cuff_1269"; gene_id "Cuff.1269"; gene_name "Cuff.1269"; locus "RLOC_00006218";
chr13	Cufflinks_novel	exon	49930327	49930505	178	transcript_id "cuff_1269"; gene_id "Cuff.1269"; gene_name "Cuff.1269"; locus "RLOC_00006218";
chr13	Cufflinks_novel	exon	49926647	49926842	195	transcript_id "cuff_1269"; gene_id "Cuff.1269"; gene_name "Cuff.1269"; locus "RLOC_00006218";
chr13	Cufflinks_novel	exon	49925728	49926007	279	transcript_id "cuff_1269"; gene_id "Cuff.1269"; gene_name "Cuff.1269"; locus "RLOC_00006218";
chr13	Cufflinks_novel	exon	49926177	49926481	304	transcript_id "cuff_1269"; gene_id "Cuff.1269"; gene_name "Cuff.1269"; locus "RLOC_00006218";
chr13	Cufflinks_novel	exon	49928888	49929214	326	transcript_id "cuff_1269"; gene_id "Cuff.1269"; gene_name "Cuff.1269"; locus "RLOC_00006218";
chr13	Cufflinks_novel	exon	49925243	49925598	355	transcript_id "cuff_1269"; gene_id "Cuff.1269"; gene_name "Cuff.1269"; locus "RLOC_00006218";
chr13	Cufflinks_novel	exon	49929872	49930265	393	transcript_id "cuff_1269"; gene_id "Cuff.1269"; gene_name "Cuff.1269"; locus "RLOC_00006218";
chr1	Cufflinks_novel	exon	56076811	56076838	27	transcript_id "cuff_127"; gene_id "Cuff.127"; gene_name "Cuff.127"; locus "RLOC_00000368";
chr1	Cufflinks_novel	exon	56075503	56075745	242	transcript_id "cuff_127"; gene_id "Cuff.127"; gene_name "Cuff.127"; locus "RLOC_00000368";
chr13	Cufflinks_novel	exon	49943799	49943827	28	transcript_id "cuff_1270"; gene_id "Cuff.1270"; gene_name "Cuff.1270"; locus "RLOC_00006219";
chr13	Cufflinks_novel	exon	49942242	49942275	33	transcript_id "cuff_1270"; gene_id "Cuff.1270"; gene_name "Cuff.1270"; locus "RLOC_00006219";
chr13	Cufflinks_novel	exon	49942553	49942588	35	transcript_id "cuff_1270"; gene_id "Cuff.1270"; gene_name "Cuff.1270"; locus "RLOC_00006219";
chr13	Cufflinks_novel	exon	49939896	49939936	40	transcript_id "cuff_1270"; gene_id "Cuff.1270"; gene_name "Cuff.1270"; locus "RLOC_00006219";
chr13	Cufflinks_novel	exon	49939247	49939354	107	transcript_id "cuff_1270"; gene_id "Cuff.1270"; gene_name "Cuff.1270"; locus "RLOC_00006219";
chr13	Cufflinks_novel	exon	49937818	49937927	109	transcript_id "cuff_1270"; gene_id "Cuff.1270"; gene_name "Cuff.1270"; locus "RLOC_00006219";
chr13	Cufflinks_novel	exon	49943342	49943478	136	transcript_id "cuff_1270"; gene_id "Cuff.1270"; gene_name "Cuff.1270"; locus "RLOC_00006219";
chr13	Cufflinks_novel	exon	49946266	49946414	148	transcript_id "cuff_1270"; gene_id "Cuff.1270"; gene_name "Cuff.1270"; locus "RLOC_00006219";
chr13	Cufflinks_novel	exon	49943534	49943707	173	transcript_id "cuff_1270"; gene_id "Cuff.1270"; gene_name "Cuff.1270"; locus "RLOC_00006219";
chr13	Cufflinks_novel	exon	49940932	49941121	189	transcript_id "cuff_1270"; gene_id "Cuff.1270"; gene_name "Cuff.1270"; locus "RLOC_00006219";
chr13	Cufflinks_novel	exon	49944985	49945177	192	transcript_id "cuff_1270"; gene_id "Cuff.1270"; gene_name "Cuff.1270"; locus "RLOC_00006219";
chr13	Cufflinks_novel	exon	49938888	49939133	245	transcript_id "cuff_1270"; gene_id "Cuff.1270"; gene_name "Cuff.1270"; locus "RLOC_00006219";
chr13	Cufflinks_novel	exon	49938255	49938506	251	transcript_id "cuff_1270"; gene_id "Cuff.1270"; gene_name "Cuff.1270"; locus "RLOC_00006219";
chr13	Cufflinks_novel	exon	49956161	49956263	102	transcript_id "cuff_1271"; gene_id "Cuff.1271"; gene_name "Cuff.1271"; locus "RLOC_00006220";
chr13	Cufflinks_novel	exon	49953957	49954109	152	transcript_id "cuff_1271"; gene_id "Cuff.1271"; gene_name "Cuff.1271"; locus "RLOC_00006220";
chr13	Cufflinks_novel	exon	49956723	49956895	172	transcript_id "cuff_1271"; gene_id "Cuff.1271"; gene_name "Cuff.1271"; locus "RLOC_00006220";
chr13	Cufflinks_novel	exon	49952014	49952193	179	transcript_id "cuff_1271"; gene_id "Cuff.1271"; gene_name "Cuff.1271"; locus "RLOC_00006220";
chr13	Cufflinks_novel	exon	49956476	49956666	190	transcript_id "cuff_1271"; gene_id "Cuff.1271"; gene_name "Cuff.1271"; locus "RLOC_00006220";
chr13	Cufflinks_novel	exon	49955629	49955868	239	transcript_id "cuff_1271"; gene_id "Cuff.1271"; gene_name "Cuff.1271"; locus "RLOC_00006220";
chr13	Cufflinks_novel	exon	49958064	49958351	287	transcript_id "cuff_1271"; gene_id "Cuff.1271"; gene_name "Cuff.1271"; locus "RLOC_00006220";
chr13	Cufflinks_novel	exon	49952807	49953101	294	transcript_id "cuff_1271"; gene_id "Cuff.1271"; gene_name "Cuff.1271"; locus "RLOC_00006220";
chr13	Cufflinks_novel	exon	49953230	49953647	417	transcript_id "cuff_1271"; gene_id "Cuff.1271"; gene_name "Cuff.1271"; locus "RLOC_00006220";
chr13	Cufflinks_novel	exon	49954320	49955443	1123	transcript_id "cuff_1271"; gene_id "Cuff.1271"; gene_name "Cuff.1271"; locus "RLOC_00006220";
chr13	Cufflinks_novel	exon	49973786	49973870	84	transcript_id "cuff_1272"; gene_id "Cuff.1272"; gene_name "Cuff.1272"; locus "RLOC_00006221";
chr13	Cufflinks_novel	exon	49973948	49974313	365	transcript_id "cuff_1272"; gene_id "Cuff.1272"; gene_name "Cuff.1272"; locus "RLOC_00006221";
chr13	Cufflinks_novel	exon	49983702	49983733	31	transcript_id "cuff_1273"; gene_id "Cuff.1273"; gene_name "Cuff.1273"; locus "RLOC_00006222";
chr13	Cufflinks_novel	exon	49983575	49983617	42	transcript_id "cuff_1273"; gene_id "Cuff.1273"; gene_name "Cuff.1273"; locus "RLOC_00006222";
chr13	Cufflinks_novel	exon	49984243	49984373	130	transcript_id "cuff_1273"; gene_id "Cuff.1273"; gene_name "Cuff.1273"; locus "RLOC_00006222";
chr13	Cufflinks_novel	exon	49987999	49988040	41	transcript_id "cuff_1274"; gene_id "Cuff.1274"; gene_name "Cuff.1274"; locus "RLOC_00006223";
chr13	Cufflinks_novel	exon	49988209	49988285	76	transcript_id "cuff_1274"; gene_id "Cuff.1274"; gene_name "Cuff.1274"; locus "RLOC_00006223";
chr13	Cufflinks_novel	exon	49990201	49990292	91	transcript_id "cuff_1274"; gene_id "Cuff.1274"; gene_name "Cuff.1274"; locus "RLOC_00006223";
chr13	Cufflinks_novel	exon	49990361	49990824	463	transcript_id "cuff_1274"; gene_id "Cuff.1274"; gene_name "Cuff.1274"; locus "RLOC_00006223";
chr13	Cufflinks_novel	exon	49986782	49987426	644	transcript_id "cuff_1274"; gene_id "Cuff.1274"; gene_name "Cuff.1274"; locus "RLOC_00006223";
chr13	Cufflinks_novel	exon	49995922	49995949	27	transcript_id "cuff_1275"; gene_id "Cuff.1275"; gene_name "Cuff.1275"; locus "RLOC_00006224";
chr13	Cufflinks_novel	exon	49998412	49998439	27	transcript_id "cuff_1275"; gene_id "Cuff.1275"; gene_name "Cuff.1275"; locus "RLOC_00006224";
chr13	Cufflinks_novel	exon	49996983	49997013	30	transcript_id "cuff_1275"; gene_id "Cuff.1275"; gene_name "Cuff.1275"; locus "RLOC_00006224";
chr13	Cufflinks_novel	exon	49994584	49994670	86	transcript_id "cuff_1275"; gene_id "Cuff.1275"; gene_name "Cuff.1275"; locus "RLOC_00006224";
chr13	Cufflinks_novel	exon	49996148	49996327	179	transcript_id "cuff_1275"; gene_id "Cuff.1275"; gene_name "Cuff.1275"; locus "RLOC_00006224";
chr13	Cufflinks_novel	exon	49996594	49996833	239	transcript_id "cuff_1275"; gene_id "Cuff.1275"; gene_name "Cuff.1275"; locus "RLOC_00006224";
chr13	Cufflinks_novel	exon	49995334	49995624	290	transcript_id "cuff_1275"; gene_id "Cuff.1275"; gene_name "Cuff.1275"; locus "RLOC_00006224";
chr13	Cufflinks_novel	exon	49994896	49995206	310	transcript_id "cuff_1275"; gene_id "Cuff.1275"; gene_name "Cuff.1275"; locus "RLOC_00006224";
chr13	Cufflinks_novel	exon	49993691	49994080	389	transcript_id "cuff_1275"; gene_id "Cuff.1275"; gene_name "Cuff.1275"; locus "RLOC_00006224";
chr13	Cufflinks_novel	exon	50006529	50006559	30	transcript_id "cuff_1276"; gene_id "Cuff.1276"; gene_name "Cuff.1276"; locus "RLOC_00006225";
chr13	Cufflinks_novel	exon	50007060	50007118	58	transcript_id "cuff_1276"; gene_id "Cuff.1276"; gene_name "Cuff.1276"; locus "RLOC_00006225";
chr13	Cufflinks_novel	exon	50011287	50011317	30	transcript_id "cuff_1277"; gene_id "Cuff.1277"; gene_name "Cuff.1277"; locus "RLOC_00006226";
chr13	Cufflinks_novel	exon	50011611	50011749	138	transcript_id "cuff_1277"; gene_id "Cuff.1277"; gene_name "Cuff.1277"; locus "RLOC_00006226";
chr13	Cufflinks_novel	exon	50012349	50012508	159	transcript_id "cuff_1277"; gene_id "Cuff.1277"; gene_name "Cuff.1277"; locus "RLOC_00006226";
chr13	Cufflinks_novel	exon	50010802	50010978	176	transcript_id "cuff_1277"; gene_id "Cuff.1277"; gene_name "Cuff.1277"; locus "RLOC_00006226";
chr13	Cufflinks_novel	exon	50010322	50010714	392	transcript_id "cuff_1277"; gene_id "Cuff.1277"; gene_name "Cuff.1277"; locus "RLOC_00006226";
chr13	Cufflinks_novel	exon	50017223	50017267	44	transcript_id "cuff_1278"; gene_id "Cuff.1278"; gene_name "Cuff.1278"; locus "RLOC_00006227";
chr13	Cufflinks_novel	exon	50016808	50016991	183	transcript_id "cuff_1278"; gene_id "Cuff.1278"; gene_name "Cuff.1278"; locus "RLOC_00006227";
chr13	Cufflinks_novel	exon	50068890	50068940	50	transcript_id "cuff_1279"; gene_id "Cuff.1279"; gene_name "Cuff.1279"; locus "RLOC_00006228";
chr13	Cufflinks_novel	exon	50065609	50065666	57	transcript_id "cuff_1279"; gene_id "Cuff.1279"; gene_name "Cuff.1279"; locus "RLOC_00006228";
chr13	Cufflinks_novel	exon	50069357	50069419	62	transcript_id "cuff_1279"; gene_id "Cuff.1279"; gene_name "Cuff.1279"; locus "RLOC_00006228";
chr13	Cufflinks_novel	exon	50067219	50067310	91	transcript_id "cuff_1279"; gene_id "Cuff.1279"; gene_name "Cuff.1279"; locus "RLOC_00006228";
chr13	Cufflinks_novel	exon	50068217	50068333	116	transcript_id "cuff_1279"; gene_id "Cuff.1279"; gene_name "Cuff.1279"; locus "RLOC_00006228";
chr13	Cufflinks_novel	exon	50068395	50068567	172	transcript_id "cuff_1279"; gene_id "Cuff.1279"; gene_name "Cuff.1279"; locus "RLOC_00006228";
chr13	Cufflinks_novel	exon	50066271	50066475	204	transcript_id "cuff_1279"; gene_id "Cuff.1279"; gene_name "Cuff.1279"; locus "RLOC_00006228";
chr13	Cufflinks_novel	exon	50071092	50071690	598	transcript_id "cuff_1279"; gene_id "Cuff.1279"; gene_name "Cuff.1279"; locus "RLOC_00006228";
chr13	Cufflinks_novel	exon	50071747	50072384	637	transcript_id "cuff_1279"; gene_id "Cuff.1279"; gene_name "Cuff.1279"; locus "RLOC_00006228";
chr1	Cufflinks_novel	exon	57185544	57185572	28	transcript_id "cuff_128"; gene_id "Cuff.128"; gene_name "Cuff.128"; locus "RLOC_00000372";
chr1	Cufflinks_novel	exon	57185375	57185454	79	transcript_id "cuff_128"; gene_id "Cuff.128"; gene_name "Cuff.128"; locus "RLOC_00000372";
chr1	Cufflinks_novel	exon	57184209	57184409	200	transcript_id "cuff_128"; gene_id "Cuff.128"; gene_name "Cuff.128"; locus "RLOC_00000372";
chr1	Cufflinks_novel	exon	57184536	57184815	279	transcript_id "cuff_128"; gene_id "Cuff.128"; gene_name "Cuff.128"; locus "RLOC_00000372";
chr1	Cufflinks_novel	exon	57185736	57186098	362	transcript_id "cuff_128"; gene_id "Cuff.128"; gene_name "Cuff.128"; locus "RLOC_00000372";
chr13	Cufflinks_novel	exon	50196724	50196784	60	transcript_id "cuff_1280"; gene_id "Cuff.1280"; gene_name "Cuff.1280"; locus "RLOC_00006229";
chr13	Cufflinks_novel	exon	50195416	50195480	64	transcript_id "cuff_1280"; gene_id "Cuff.1280"; gene_name "Cuff.1280"; locus "RLOC_00006229";
chr13	Cufflinks_novel	exon	50195102	50195315	213	transcript_id "cuff_1280"; gene_id "Cuff.1280"; gene_name "Cuff.1280"; locus "RLOC_00006229";
chr13	Cufflinks_novel	exon	50195698	50196058	360	transcript_id "cuff_1280"; gene_id "Cuff.1280"; gene_name "Cuff.1280"; locus "RLOC_00006229";
chr13	Cufflinks_novel	exon	50291846	50291946	100	transcript_id "cuff_1281"; gene_id "Cuff.1281"; gene_name "Cuff.1281"; locus "RLOC_00006230";
chr13	Cufflinks_novel	exon	50296093	50296211	118	transcript_id "cuff_1281"; gene_id "Cuff.1281"; gene_name "Cuff.1281"; locus "RLOC_00006230";
chr13	Cufflinks_novel	exon	50293236	50293459	223	transcript_id "cuff_1281"; gene_id "Cuff.1281"; gene_name "Cuff.1281"; locus "RLOC_00006230";
chr13	Cufflinks_novel	exon	50291121	50291375	254	transcript_id "cuff_1281"; gene_id "Cuff.1281"; gene_name "Cuff.1281"; locus "RLOC_00006230";
chr13	Cufflinks_novel	exon	50295194	50295482	288	transcript_id "cuff_1281"; gene_id "Cuff.1281"; gene_name "Cuff.1281"; locus "RLOC_00006230";
chr13	Cufflinks_novel	exon	50293530	50293999	469	transcript_id "cuff_1281"; gene_id "Cuff.1281"; gene_name "Cuff.1281"; locus "RLOC_00006230";
chr13	Cufflinks_novel	exon	50294077	50294707	630	transcript_id "cuff_1281"; gene_id "Cuff.1281"; gene_name "Cuff.1281"; locus "RLOC_00006230";
chr13	Cufflinks_novel	exon	50371019	50371171	152	transcript_id "cuff_1282"; gene_id "Cuff.1282"; gene_name "Cuff.1282"; locus "RLOC_00006232";
chr13	Cufflinks_novel	exon	50372501	50372831	330	transcript_id "cuff_1282"; gene_id "Cuff.1282"; gene_name "Cuff.1282"; locus "RLOC_00006232";
chr13	Cufflinks_novel	exon	50384923	50385070	147	transcript_id "cuff_1283"; gene_id "Cuff.1283"; gene_name "Cuff.1283"; locus "RLOC_00006233";
chr13	Cufflinks_novel	exon	50385413	50385579	166	transcript_id "cuff_1283"; gene_id "Cuff.1283"; gene_name "Cuff.1283"; locus "RLOC_00006233";
chr13	Cufflinks_novel	exon	50397488	50397515	27	transcript_id "cuff_1284"; gene_id "Cuff.1284"; gene_name "Cuff.1284"; locus "RLOC_00006234";
chr13	Cufflinks_novel	exon	50399230	50399310	80	transcript_id "cuff_1284"; gene_id "Cuff.1284"; gene_name "Cuff.1284"; locus "RLOC_00006234";
chr13	Cufflinks_novel	exon	50402903	50402985	82	transcript_id "cuff_1285"; gene_id "Cuff.1285"; gene_name "Cuff.1285"; locus "RLOC_00006235";
chr13	Cufflinks_novel	exon	50403850	50403946	96	transcript_id "cuff_1285"; gene_id "Cuff.1285"; gene_name "Cuff.1285"; locus "RLOC_00006235";
chr13	Cufflinks_novel	exon	50402297	50402712	415	transcript_id "cuff_1285"; gene_id "Cuff.1285"; gene_name "Cuff.1285"; locus "RLOC_00006235";
chr13	Cufflinks_novel	exon	50420855	50421029	174	transcript_id "cuff_1286"; gene_id "Cuff.1286"; gene_name "Cuff.1286"; locus "RLOC_00006236";
chr13	Cufflinks_novel	exon	50421448	50421681	233	transcript_id "cuff_1286"; gene_id "Cuff.1286"; gene_name "Cuff.1286"; locus "RLOC_00006236";
chr13	Cufflinks_novel	exon	50428453	50428661	208	transcript_id "cuff_1287"; gene_id "Cuff.1287"; gene_name "Cuff.1287"; locus "RLOC_00006237";
chr13	Cufflinks_novel	exon	50427878	50428136	258	transcript_id "cuff_1287"; gene_id "Cuff.1287"; gene_name "Cuff.1287"; locus "RLOC_00006237";
chr13	Cufflinks_novel	exon	50433345	50433372	27	transcript_id "cuff_1288"; gene_id "Cuff.1288"; gene_name "Cuff.1288"; locus "RLOC_00006238";
chr13	Cufflinks_novel	exon	50436005	50436032	27	transcript_id "cuff_1288"; gene_id "Cuff.1288"; gene_name "Cuff.1288"; locus "RLOC_00006238";
chr13	Cufflinks_novel	exon	50432038	50432099	61	transcript_id "cuff_1288"; gene_id "Cuff.1288"; gene_name "Cuff.1288"; locus "RLOC_00006238";
chr13	Cufflinks_novel	exon	50437445	50437536	91	transcript_id "cuff_1288"; gene_id "Cuff.1288"; gene_name "Cuff.1288"; locus "RLOC_00006238";
chr13	Cufflinks_novel	exon	50431525	50431621	96	transcript_id "cuff_1288"; gene_id "Cuff.1288"; gene_name "Cuff.1288"; locus "RLOC_00006238";
chr13	Cufflinks_novel	exon	50436283	50436406	123	transcript_id "cuff_1288"; gene_id "Cuff.1288"; gene_name "Cuff.1288"; locus "RLOC_00006238";
chr13	Cufflinks_novel	exon	50432399	50432529	130	transcript_id "cuff_1288"; gene_id "Cuff.1288"; gene_name "Cuff.1288"; locus "RLOC_00006238";
chr13	Cufflinks_novel	exon	50435090	50435224	134	transcript_id "cuff_1288"; gene_id "Cuff.1288"; gene_name "Cuff.1288"; locus "RLOC_00006238";
chr13	Cufflinks_novel	exon	50430978	50431120	142	transcript_id "cuff_1288"; gene_id "Cuff.1288"; gene_name "Cuff.1288"; locus "RLOC_00006238";
chr13	Cufflinks_novel	exon	50434549	50434738	189	transcript_id "cuff_1288"; gene_id "Cuff.1288"; gene_name "Cuff.1288"; locus "RLOC_00006238";
chr13	Cufflinks_novel	exon	50438982	50439227	245	transcript_id "cuff_1288"; gene_id "Cuff.1288"; gene_name "Cuff.1288"; locus "RLOC_00006238";
chr13	Cufflinks_novel	exon	50432660	50432990	330	transcript_id "cuff_1288"; gene_id "Cuff.1288"; gene_name "Cuff.1288"; locus "RLOC_00006238";
chr13	Cufflinks_novel	exon	50467140	50467247	107	transcript_id "cuff_1289"; gene_id "Cuff.1289"; gene_name "Cuff.1289"; locus "RLOC_00006239";
chr13	Cufflinks_novel	exon	50467425	50467572	147	transcript_id "cuff_1289"; gene_id "Cuff.1289"; gene_name "Cuff.1289"; locus "RLOC_00006239";
chr1	Cufflinks_novel	exon	57412677	57412705	28	transcript_id "cuff_129"; gene_id "Cuff.129"; gene_name "Cuff.129"; locus "RLOC_00000374";
chr1	Cufflinks_novel	exon	57414633	57414800	167	transcript_id "cuff_129"; gene_id "Cuff.129"; gene_name "Cuff.129"; locus "RLOC_00000374";
chr1	Cufflinks_novel	exon	57415340	57415586	246	transcript_id "cuff_129"; gene_id "Cuff.129"; gene_name "Cuff.129"; locus "RLOC_00000374";
chr1	Cufflinks_novel	exon	57416485	57416795	310	transcript_id "cuff_129"; gene_id "Cuff.129"; gene_name "Cuff.129"; locus "RLOC_00000374";
chr1	Cufflinks_novel	exon	57414239	57414570	331	transcript_id "cuff_129"; gene_id "Cuff.129"; gene_name "Cuff.129"; locus "RLOC_00000374";
chr1	Cufflinks_novel	exon	57412888	57413308	420	transcript_id "cuff_129"; gene_id "Cuff.129"; gene_name "Cuff.129"; locus "RLOC_00000374";
chr1	Cufflinks_novel	exon	57413693	57414147	454	transcript_id "cuff_129"; gene_id "Cuff.129"; gene_name "Cuff.129"; locus "RLOC_00000374";
chr13	Cufflinks_novel	exon	50536096	50536123	27	transcript_id "cuff_1290"; gene_id "Cuff.1290"; gene_name "Cuff.1290"; locus "RLOC_00006241";
chr13	Cufflinks_novel	exon	50537333	50537367	34	transcript_id "cuff_1290"; gene_id "Cuff.1290"; gene_name "Cuff.1290"; locus "RLOC_00006241";
chr13	Cufflinks_novel	exon	50539122	50539213	91	transcript_id "cuff_1290"; gene_id "Cuff.1290"; gene_name "Cuff.1290"; locus "RLOC_00006241";
chr13	Cufflinks_novel	exon	50536820	50536927	107	transcript_id "cuff_1290"; gene_id "Cuff.1290"; gene_name "Cuff.1290"; locus "RLOC_00006241";
chr13	Cufflinks_novel	exon	50538733	50538913	180	transcript_id "cuff_1290"; gene_id "Cuff.1290"; gene_name "Cuff.1290"; locus "RLOC_00006241";
chr13	Cufflinks_novel	exon	50559205	50559387	182	transcript_id "cuff_1291"; gene_id "Cuff.1291"; gene_name "Cuff.1291"; locus "RLOC_00006242";
chr13	Cufflinks_novel	exon	50558791	50559010	219	transcript_id "cuff_1291"; gene_id "Cuff.1291"; gene_name "Cuff.1291"; locus "RLOC_00006242";
chr13	Cufflinks_novel	exon	50622570	50622601	31	transcript_id "cuff_1292"; gene_id "Cuff.1292"; gene_name "Cuff.1292"; locus "RLOC_00006246";
chr13	Cufflinks_novel	exon	50618925	50618968	43	transcript_id "cuff_1292"; gene_id "Cuff.1292"; gene_name "Cuff.1292"; locus "RLOC_00006246";
chr13	Cufflinks_novel	exon	50622717	50622760	43	transcript_id "cuff_1292"; gene_id "Cuff.1292"; gene_name "Cuff.1292"; locus "RLOC_00006246";
chr13	Cufflinks_novel	exon	50621127	50621245	118	transcript_id "cuff_1292"; gene_id "Cuff.1292"; gene_name "Cuff.1292"; locus "RLOC_00006246";
chr13	Cufflinks_novel	exon	50615818	50616004	186	transcript_id "cuff_1292"; gene_id "Cuff.1292"; gene_name "Cuff.1292"; locus "RLOC_00006246";
chr13	Cufflinks_novel	exon	50619053	50619319	266	transcript_id "cuff_1292"; gene_id "Cuff.1292"; gene_name "Cuff.1292"; locus "RLOC_00006246";
chr13	Cufflinks_novel	exon	50617489	50617804	315	transcript_id "cuff_1292"; gene_id "Cuff.1292"; gene_name "Cuff.1292"; locus "RLOC_00006246";
chr13	Cufflinks_novel	exon	50619378	50619815	437	transcript_id "cuff_1292"; gene_id "Cuff.1292"; gene_name "Cuff.1292"; locus "RLOC_00006246";
chr13	Cufflinks_novel	exon	50620467	50620905	438	transcript_id "cuff_1292"; gene_id "Cuff.1292"; gene_name "Cuff.1292"; locus "RLOC_00006246";
chr13	Cufflinks_novel	exon	50622011	50622454	443	transcript_id "cuff_1292"; gene_id "Cuff.1292"; gene_name "Cuff.1292"; locus "RLOC_00006246";
chr13	Cufflinks_novel	exon	50621304	50621855	551	transcript_id "cuff_1292"; gene_id "Cuff.1292"; gene_name "Cuff.1292"; locus "RLOC_00006246";
chr13	Cufflinks_novel	exon	50633948	50634073	125	transcript_id "cuff_1293"; gene_id "Cuff.1293"; gene_name "Cuff.1293"; locus "RLOC_00006247";
chr13	Cufflinks_novel	exon	50634647	50634896	249	transcript_id "cuff_1293"; gene_id "Cuff.1293"; gene_name "Cuff.1293"; locus "RLOC_00006247";
chr13	Cufflinks_novel	exon	50636832	50637139	307	transcript_id "cuff_1293"; gene_id "Cuff.1293"; gene_name "Cuff.1293"; locus "RLOC_00006247";
chr13	Cufflinks_novel	exon	50634970	50635366	396	transcript_id "cuff_1293"; gene_id "Cuff.1293"; gene_name "Cuff.1293"; locus "RLOC_00006247";
chr13	Cufflinks_novel	exon	50636160	50636682	522	transcript_id "cuff_1293"; gene_id "Cuff.1293"; gene_name "Cuff.1293"; locus "RLOC_00006247";
chr13	Cufflinks_novel	exon	50640154	50640322	168	transcript_id "cuff_1294"; gene_id "Cuff.1294"; gene_name "Cuff.1294"; locus "RLOC_00006249";
chr13	Cufflinks_novel	exon	50640478	50640648	170	transcript_id "cuff_1294"; gene_id "Cuff.1294"; gene_name "Cuff.1294"; locus "RLOC_00006249";
chr13	Cufflinks_novel	exon	50642239	50643220	981	transcript_id "cuff_1294"; gene_id "Cuff.1294"; gene_name "Cuff.1294"; locus "RLOC_00006249";
chr13	Cufflinks_novel	exon	50640726	50642175	1449	transcript_id "cuff_1294"; gene_id "Cuff.1294"; gene_name "Cuff.1294"; locus "RLOC_00006249";
chr13	Cufflinks_novel	exon	50663234	50663261	27	transcript_id "cuff_1295"; gene_id "Cuff.1295"; gene_name "Cuff.1295"; locus "RLOC_00006250";
chr13	Cufflinks_novel	exon	50666254	50666423	169	transcript_id "cuff_1295"; gene_id "Cuff.1295"; gene_name "Cuff.1295"; locus "RLOC_00006250";
chr13	Cufflinks_novel	exon	50661965	50662144	179	transcript_id "cuff_1295"; gene_id "Cuff.1295"; gene_name "Cuff.1295"; locus "RLOC_00006250";
chr13	Cufflinks_novel	exon	50664753	50664948	195	transcript_id "cuff_1295"; gene_id "Cuff.1295"; gene_name "Cuff.1295"; locus "RLOC_00006250";
chr13	Cufflinks_novel	exon	50671167	50671439	272	transcript_id "cuff_1295"; gene_id "Cuff.1295"; gene_name "Cuff.1295"; locus "RLOC_00006250";
chr13	Cufflinks_novel	exon	50667816	50668139	323	transcript_id "cuff_1295"; gene_id "Cuff.1295"; gene_name "Cuff.1295"; locus "RLOC_00006250";
chr13	Cufflinks_novel	exon	50668288	50668680	392	transcript_id "cuff_1295"; gene_id "Cuff.1295"; gene_name "Cuff.1295"; locus "RLOC_00006250";
chr13	Cufflinks_novel	exon	50670590	50671074	484	transcript_id "cuff_1295"; gene_id "Cuff.1295"; gene_name "Cuff.1295"; locus "RLOC_00006250";
chr13	Cufflinks_novel	exon	50656753	50657442	689	transcript_id "cuff_1295"; gene_id "Cuff.1295"; gene_name "Cuff.1295"; locus "RLOC_00006250";
chr13	Cufflinks_novel	exon	50665000	50665800	800	transcript_id "cuff_1295"; gene_id "Cuff.1295"; gene_name "Cuff.1295"; locus "RLOC_00006250";
chr13	Cufflinks_novel	exon	50660656	50661528	872	transcript_id "cuff_1295"; gene_id "Cuff.1295"; gene_name "Cuff.1295"; locus "RLOC_00006250";
chr13	Cufflinks_novel	exon	50657517	50658412	895	transcript_id "cuff_1295"; gene_id "Cuff.1295"; gene_name "Cuff.1295"; locus "RLOC_00006250";
chr13	Cufflinks_novel	exon	50658519	50659566	1047	transcript_id "cuff_1295"; gene_id "Cuff.1295"; gene_name "Cuff.1295"; locus "RLOC_00006250";
chr13	Cufflinks_novel	exon	50663359	50664680	1321	transcript_id "cuff_1295"; gene_id "Cuff.1295"; gene_name "Cuff.1295"; locus "RLOC_00006250";
chr13	Cufflinks_novel	exon	50682419	50682487	68	transcript_id "cuff_1296"; gene_id "Cuff.1296"; gene_name "Cuff.1296"; locus "RLOC_00006251";
chr13	Cufflinks_novel	exon	50679218	50679294	76	transcript_id "cuff_1296"; gene_id "Cuff.1296"; gene_name "Cuff.1296"; locus "RLOC_00006251";
chr13	Cufflinks_novel	exon	50685423	50685513	90	transcript_id "cuff_1296"; gene_id "Cuff.1296"; gene_name "Cuff.1296"; locus "RLOC_00006251";
chr13	Cufflinks_novel	exon	50684085	50684211	126	transcript_id "cuff_1296"; gene_id "Cuff.1296"; gene_name "Cuff.1296"; locus "RLOC_00006251";
chr13	Cufflinks_novel	exon	50679448	50679579	131	transcript_id "cuff_1296"; gene_id "Cuff.1296"; gene_name "Cuff.1296"; locus "RLOC_00006251";
chr13	Cufflinks_novel	exon	50680647	50680794	147	transcript_id "cuff_1296"; gene_id "Cuff.1296"; gene_name "Cuff.1296"; locus "RLOC_00006251";
chr13	Cufflinks_novel	exon	50682550	50682721	171	transcript_id "cuff_1296"; gene_id "Cuff.1296"; gene_name "Cuff.1296"; locus "RLOC_00006251";
chr13	Cufflinks_novel	exon	50684271	50684727	456	transcript_id "cuff_1296"; gene_id "Cuff.1296"; gene_name "Cuff.1296"; locus "RLOC_00006251";
chr13	Cufflinks_novel	exon	50684792	50685359	567	transcript_id "cuff_1296"; gene_id "Cuff.1296"; gene_name "Cuff.1296"; locus "RLOC_00006251";
chr13	Cufflinks_novel	exon	50696817	50696963	146	transcript_id "cuff_1297"; gene_id "Cuff.1297"; gene_name "Cuff.1297"; locus "RLOC_00006253";
chr13	Cufflinks_novel	exon	50698595	50699016	421	transcript_id "cuff_1297"; gene_id "Cuff.1297"; gene_name "Cuff.1297"; locus "RLOC_00006253";
chr13	Cufflinks_novel	exon	50706645	50706726	81	transcript_id "cuff_1298"; gene_id "Cuff.1298"; gene_name "Cuff.1298"; locus "RLOC_00006254";
chr13	Cufflinks_novel	exon	50707923	50708392	469	transcript_id "cuff_1298"; gene_id "Cuff.1298"; gene_name "Cuff.1298"; locus "RLOC_00006254";
chr13	Cufflinks_novel	exon	50707217	50707837	620	transcript_id "cuff_1298"; gene_id "Cuff.1298"; gene_name "Cuff.1298"; locus "RLOC_00006254";
chr13	Cufflinks_novel	exon	50709922	50710800	878	transcript_id "cuff_1298"; gene_id "Cuff.1298"; gene_name "Cuff.1298"; locus "RLOC_00006254";
chr13	Cufflinks_novel	exon	50743216	50743298	82	transcript_id "cuff_1299"; gene_id "Cuff.1299"; gene_name "Cuff.1299"; locus "RLOC_00006256";
chr13	Cufflinks_novel	exon	50743663	50743809	146	transcript_id "cuff_1299"; gene_id "Cuff.1299"; gene_name "Cuff.1299"; locus "RLOC_00006256";
chr1	Cufflinks_novel	exon	13905790	13905848	58	transcript_id "cuff_13"; gene_id "Cuff.13"; gene_name "Cuff.13"; locus "RLOC_00000053";
chr1	Cufflinks_novel	exon	13904425	13904635	210	transcript_id "cuff_13"; gene_id "Cuff.13"; gene_name "Cuff.13"; locus "RLOC_00000053";
chr1	Cufflinks_novel	exon	58934910	58935007	97	transcript_id "cuff_130"; gene_id "Cuff.130"; gene_name "Cuff.130"; locus "RLOC_00000395";
chr1	Cufflinks_novel	exon	58933192	58933387	195	transcript_id "cuff_130"; gene_id "Cuff.130"; gene_name "Cuff.130"; locus "RLOC_00000395";
chr13	Cufflinks_novel	exon	50907723	50907750	27	transcript_id "cuff_1300"; gene_id "Cuff.1300"; gene_name "Cuff.1300"; locus "RLOC_00006257";
chr13	Cufflinks_novel	exon	50908408	50908435	27	transcript_id "cuff_1300"; gene_id "Cuff.1300"; gene_name "Cuff.1300"; locus "RLOC_00006257";
chr13	Cufflinks_novel	exon	50911274	50911314	40	transcript_id "cuff_1300"; gene_id "Cuff.1300"; gene_name "Cuff.1300"; locus "RLOC_00006257";
chr13	Cufflinks_novel	exon	50908045	50908095	50	transcript_id "cuff_1300"; gene_id "Cuff.1300"; gene_name "Cuff.1300"; locus "RLOC_00006257";
chr13	Cufflinks_novel	exon	50913276	50913333	57	transcript_id "cuff_1300"; gene_id "Cuff.1300"; gene_name "Cuff.1300"; locus "RLOC_00006257";
chr13	Cufflinks_novel	exon	50912422	50912563	141	transcript_id "cuff_1300"; gene_id "Cuff.1300"; gene_name "Cuff.1300"; locus "RLOC_00006257";
chr13	Cufflinks_novel	exon	50907816	50907980	164	transcript_id "cuff_1300"; gene_id "Cuff.1300"; gene_name "Cuff.1300"; locus "RLOC_00006257";
chr13	Cufflinks_novel	exon	50909440	50909624	184	transcript_id "cuff_1300"; gene_id "Cuff.1300"; gene_name "Cuff.1300"; locus "RLOC_00006257";
chr13	Cufflinks_novel	exon	50908616	50909277	661	transcript_id "cuff_1300"; gene_id "Cuff.1300"; gene_name "Cuff.1300"; locus "RLOC_00006257";
chr13	Cufflinks_novel	exon	50906623	50907614	991	transcript_id "cuff_1300"; gene_id "Cuff.1300"; gene_name "Cuff.1300"; locus "RLOC_00006257";
chr13	Cufflinks_novel	exon	50953646	50953673	27	transcript_id "cuff_1301"; gene_id "Cuff.1301"; gene_name "Cuff.1301"; locus "RLOC_00006258";
chr13	Cufflinks_novel	exon	50952906	50953125	219	transcript_id "cuff_1301"; gene_id "Cuff.1301"; gene_name "Cuff.1301"; locus "RLOC_00006258";
chr13	Cufflinks_novel	exon	50983253	50983303	50	transcript_id "cuff_1302"; gene_id "Cuff.1302"; gene_name "Cuff.1302"; locus "RLOC_00006259";
chr13	Cufflinks_novel	exon	50982668	50982719	51	transcript_id "cuff_1302"; gene_id "Cuff.1302"; gene_name "Cuff.1302"; locus "RLOC_00006259";
chr13	Cufflinks_novel	exon	50986676	50986740	64	transcript_id "cuff_1302"; gene_id "Cuff.1302"; gene_name "Cuff.1302"; locus "RLOC_00006259";
chr13	Cufflinks_novel	exon	50981350	50981431	81	transcript_id "cuff_1302"; gene_id "Cuff.1302"; gene_name "Cuff.1302"; locus "RLOC_00006259";
chr13	Cufflinks_novel	exon	50985365	50985496	131	transcript_id "cuff_1302"; gene_id "Cuff.1302"; gene_name "Cuff.1302"; locus "RLOC_00006259";
chr13	Cufflinks_novel	exon	50986100	50986251	151	transcript_id "cuff_1302"; gene_id "Cuff.1302"; gene_name "Cuff.1302"; locus "RLOC_00006259";
chr13	Cufflinks_novel	exon	50984878	50985157	279	transcript_id "cuff_1302"; gene_id "Cuff.1302"; gene_name "Cuff.1302"; locus "RLOC_00006259";
chr13	Cufflinks_novel	exon	50983822	50984701	879	transcript_id "cuff_1302"; gene_id "Cuff.1302"; gene_name "Cuff.1302"; locus "RLOC_00006259";
chr13	Cufflinks_novel	exon	51009056	51009112	56	transcript_id "cuff_1303"; gene_id "Cuff.1303"; gene_name "Cuff.1303"; locus "RLOC_00006261";
chr13	Cufflinks_novel	exon	51007965	51008578	613	transcript_id "cuff_1303"; gene_id "Cuff.1303"; gene_name "Cuff.1303"; locus "RLOC_00006261";
chr13	Cufflinks_novel	exon	51024078	51024176	98	transcript_id "cuff_1304"; gene_id "Cuff.1304"; gene_name "Cuff.1304"; locus "RLOC_00006262";
chr13	Cufflinks_novel	exon	51021658	51021852	194	transcript_id "cuff_1304"; gene_id "Cuff.1304"; gene_name "Cuff.1304"; locus "RLOC_00006262";
chr13	Cufflinks_novel	exon	51022576	51022785	209	transcript_id "cuff_1304"; gene_id "Cuff.1304"; gene_name "Cuff.1304"; locus "RLOC_00006262";
chr13	Cufflinks_novel	exon	51022003	51022522	519	transcript_id "cuff_1304"; gene_id "Cuff.1304"; gene_name "Cuff.1304"; locus "RLOC_00006262";
chr13	Cufflinks_novel	exon	51020671	51021369	698	transcript_id "cuff_1304"; gene_id "Cuff.1304"; gene_name "Cuff.1304"; locus "RLOC_00006262";
chr13	Cufflinks_novel	exon	52185477	52185504	27	transcript_id "cuff_1305"; gene_id "Cuff.1305"; gene_name "Cuff.1305"; locus "RLOC_00006272";
chr13	Cufflinks_novel	exon	52185732	52185773	41	transcript_id "cuff_1305"; gene_id "Cuff.1305"; gene_name "Cuff.1305"; locus "RLOC_00006272";
chr13	Cufflinks_novel	exon	52197506	52197533	27	transcript_id "cuff_1306"; gene_id "Cuff.1306"; gene_name "Cuff.1306"; locus "RLOC_00006273";
chr13	Cufflinks_novel	exon	52197078	52197142	64	transcript_id "cuff_1306"; gene_id "Cuff.1306"; gene_name "Cuff.1306"; locus "RLOC_00006273";
chr13	Cufflinks_novel	exon	52196331	52196465	134	transcript_id "cuff_1306"; gene_id "Cuff.1306"; gene_name "Cuff.1306"; locus "RLOC_00006273";
chr13	Cufflinks_novel	exon	52197233	52197386	153	transcript_id "cuff_1306"; gene_id "Cuff.1306"; gene_name "Cuff.1306"; locus "RLOC_00006273";
chr13	Cufflinks_novel	exon	52196532	52196776	244	transcript_id "cuff_1306"; gene_id "Cuff.1306"; gene_name "Cuff.1306"; locus "RLOC_00006273";
chr13	Cufflinks_novel	exon	52194633	52194882	249	transcript_id "cuff_1306"; gene_id "Cuff.1306"; gene_name "Cuff.1306"; locus "RLOC_00006273";
chr13	Cufflinks_novel	exon	52195279	52195600	321	transcript_id "cuff_1306"; gene_id "Cuff.1306"; gene_name "Cuff.1306"; locus "RLOC_00006273";
chr13	Cufflinks_novel	exon	52199752	52199779	27	transcript_id "cuff_1307"; gene_id "Cuff.1307"; gene_name "Cuff.1307"; locus "RLOC_00006274";
chr13	Cufflinks_novel	exon	52201347	52201509	162	transcript_id "cuff_1307"; gene_id "Cuff.1307"; gene_name "Cuff.1307"; locus "RLOC_00006274";
chr13	Cufflinks_novel	exon	52200612	52201292	680	transcript_id "cuff_1307"; gene_id "Cuff.1307"; gene_name "Cuff.1307"; locus "RLOC_00006274";
chr13	Cufflinks_novel	exon	52206145	52206189	44	transcript_id "cuff_1308"; gene_id "Cuff.1308"; gene_name "Cuff.1308"; locus "RLOC_00006275";
chr13	Cufflinks_novel	exon	52207793	52207892	99	transcript_id "cuff_1308"; gene_id "Cuff.1308"; gene_name "Cuff.1308"; locus "RLOC_00006275";
chr13	Cufflinks_novel	exon	52207997	52208099	102	transcript_id "cuff_1308"; gene_id "Cuff.1308"; gene_name "Cuff.1308"; locus "RLOC_00006275";
chr13	Cufflinks_novel	exon	52206881	52207073	192	transcript_id "cuff_1308"; gene_id "Cuff.1308"; gene_name "Cuff.1308"; locus "RLOC_00006275";
chr13	Cufflinks_novel	exon	52208173	52208401	228	transcript_id "cuff_1308"; gene_id "Cuff.1308"; gene_name "Cuff.1308"; locus "RLOC_00006275";
chr13	Cufflinks_novel	exon	52214805	52214832	27	transcript_id "cuff_1309"; gene_id "Cuff.1309"; gene_name "Cuff.1309"; locus "RLOC_00006276";
chr13	Cufflinks_novel	exon	52214886	52214919	33	transcript_id "cuff_1309"; gene_id "Cuff.1309"; gene_name "Cuff.1309"; locus "RLOC_00006276";
chr13	Cufflinks_novel	exon	52210532	52210641	109	transcript_id "cuff_1309"; gene_id "Cuff.1309"; gene_name "Cuff.1309"; locus "RLOC_00006276";
chr13	Cufflinks_novel	exon	52213320	52213487	167	transcript_id "cuff_1309"; gene_id "Cuff.1309"; gene_name "Cuff.1309"; locus "RLOC_00006276";
chr13	Cufflinks_novel	exon	52215395	52215593	198	transcript_id "cuff_1309"; gene_id "Cuff.1309"; gene_name "Cuff.1309"; locus "RLOC_00006276";
chr13	Cufflinks_novel	exon	52214367	52214622	255	transcript_id "cuff_1309"; gene_id "Cuff.1309"; gene_name "Cuff.1309"; locus "RLOC_00006276";
chr13	Cufflinks_novel	exon	52212115	52212386	271	transcript_id "cuff_1309"; gene_id "Cuff.1309"; gene_name "Cuff.1309"; locus "RLOC_00006276";
chr13	Cufflinks_novel	exon	52213731	52214102	371	transcript_id "cuff_1309"; gene_id "Cuff.1309"; gene_name "Cuff.1309"; locus "RLOC_00006276";
chr1	Cufflinks_novel	exon	58948836	58948879	43	transcript_id "cuff_131"; gene_id "Cuff.131"; gene_name "Cuff.131"; locus "RLOC_00000396";
chr1	Cufflinks_novel	exon	58948038	58948139	101	transcript_id "cuff_131"; gene_id "Cuff.131"; gene_name "Cuff.131"; locus "RLOC_00000396";
chr1	Cufflinks_novel	exon	58947333	58947502	169	transcript_id "cuff_131"; gene_id "Cuff.131"; gene_name "Cuff.131"; locus "RLOC_00000396";
chr1	Cufflinks_novel	exon	58949434	58949663	229	transcript_id "cuff_131"; gene_id "Cuff.131"; gene_name "Cuff.131"; locus "RLOC_00000396";
chr1	Cufflinks_novel	exon	58948266	58948656	390	transcript_id "cuff_131"; gene_id "Cuff.131"; gene_name "Cuff.131"; locus "RLOC_00000396";
chr13	Cufflinks_novel	exon	53492316	53492424	108	transcript_id "cuff_1310"; gene_id "Cuff.1310"; gene_name "Cuff.1310"; locus "RLOC_00006285";
chr13	Cufflinks_novel	exon	53491898	53492092	194	transcript_id "cuff_1310"; gene_id "Cuff.1310"; gene_name "Cuff.1310"; locus "RLOC_00006285";
chr13	Cufflinks_novel	exon	53492519	53492984	465	transcript_id "cuff_1310"; gene_id "Cuff.1310"; gene_name "Cuff.1310"; locus "RLOC_00006285";
chr13	Cufflinks_novel	exon	53488989	53489782	793	transcript_id "cuff_1310"; gene_id "Cuff.1310"; gene_name "Cuff.1310"; locus "RLOC_00006285";
chr13	Cufflinks_novel	exon	53490557	53491835	1278	transcript_id "cuff_1310"; gene_id "Cuff.1310"; gene_name "Cuff.1310"; locus "RLOC_00006285";
chr13	Cufflinks_novel	exon	53501862	53502083	221	transcript_id "cuff_1311"; gene_id "Cuff.1311"; gene_name "Cuff.1311"; locus "RLOC_00006287";
chr13	Cufflinks_novel	exon	53500610	53501009	399	transcript_id "cuff_1311"; gene_id "Cuff.1311"; gene_name "Cuff.1311"; locus "RLOC_00006287";
chr13	Cufflinks_novel	exon	53510313	53510437	124	transcript_id "cuff_1312"; gene_id "Cuff.1312"; gene_name "Cuff.1312"; locus "RLOC_00006288";
chr13	Cufflinks_novel	exon	53516147	53516316	169	transcript_id "cuff_1312"; gene_id "Cuff.1312"; gene_name "Cuff.1312"; locus "RLOC_00006288";
chr13	Cufflinks_novel	exon	53511166	53511404	238	transcript_id "cuff_1312"; gene_id "Cuff.1312"; gene_name "Cuff.1312"; locus "RLOC_00006288";
chr13	Cufflinks_novel	exon	53508576	53508889	313	transcript_id "cuff_1312"; gene_id "Cuff.1312"; gene_name "Cuff.1312"; locus "RLOC_00006288";
chr13	Cufflinks_novel	exon	53506662	53507009	347	transcript_id "cuff_1312"; gene_id "Cuff.1312"; gene_name "Cuff.1312"; locus "RLOC_00006288";
chr13	Cufflinks_novel	exon	53510645	53511005	360	transcript_id "cuff_1312"; gene_id "Cuff.1312"; gene_name "Cuff.1312"; locus "RLOC_00006288";
chr13	Cufflinks_novel	exon	53511464	53511850	386	transcript_id "cuff_1312"; gene_id "Cuff.1312"; gene_name "Cuff.1312"; locus "RLOC_00006288";
chr13	Cufflinks_novel	exon	53509706	53510116	410	transcript_id "cuff_1312"; gene_id "Cuff.1312"; gene_name "Cuff.1312"; locus "RLOC_00006288";
chr13	Cufflinks_novel	exon	53507945	53508435	490	transcript_id "cuff_1312"; gene_id "Cuff.1312"; gene_name "Cuff.1312"; locus "RLOC_00006288";
chr13	Cufflinks_novel	exon	53509068	53509651	583	transcript_id "cuff_1312"; gene_id "Cuff.1312"; gene_name "Cuff.1312"; locus "RLOC_00006288";
chr13	Cufflinks_novel	exon	53516382	53517047	665	transcript_id "cuff_1312"; gene_id "Cuff.1312"; gene_name "Cuff.1312"; locus "RLOC_00006288";
chr13	Cufflinks_novel	exon	53514872	53516047	1175	transcript_id "cuff_1312"; gene_id "Cuff.1312"; gene_name "Cuff.1312"; locus "RLOC_00006288";
chr13	Cufflinks_novel	exon	53511903	53514711	2808	transcript_id "cuff_1312"; gene_id "Cuff.1312"; gene_name "Cuff.1312"; locus "RLOC_00006288";
chr13	Cufflinks_novel	exon	53520323	53520351	28	transcript_id "cuff_1313"; gene_id "Cuff.1313"; gene_name "Cuff.1313"; locus "RLOC_00006289";
chr13	Cufflinks_novel	exon	53522371	53522401	30	transcript_id "cuff_1313"; gene_id "Cuff.1313"; gene_name "Cuff.1313"; locus "RLOC_00006289";
chr13	Cufflinks_novel	exon	53521525	53521686	161	transcript_id "cuff_1313"; gene_id "Cuff.1313"; gene_name "Cuff.1313"; locus "RLOC_00006289";
chr13	Cufflinks_novel	exon	53521213	53521383	170	transcript_id "cuff_1313"; gene_id "Cuff.1313"; gene_name "Cuff.1313"; locus "RLOC_00006289";
chr13	Cufflinks_novel	exon	53520533	53520761	228	transcript_id "cuff_1313"; gene_id "Cuff.1313"; gene_name "Cuff.1313"; locus "RLOC_00006289";
chr13	Cufflinks_novel	exon	53525122	53525287	165	transcript_id "cuff_1314"; gene_id "Cuff.1314"; gene_name "Cuff.1314"; locus "RLOC_00006290";
chr13	Cufflinks_novel	exon	53526522	53526703	181	transcript_id "cuff_1314"; gene_id "Cuff.1314"; gene_name "Cuff.1314"; locus "RLOC_00006290";
chr13	Cufflinks_novel	exon	53526035	53526260	225	transcript_id "cuff_1314"; gene_id "Cuff.1314"; gene_name "Cuff.1314"; locus "RLOC_00006290";
chr13	Cufflinks_novel	exon	53545421	53545519	98	transcript_id "cuff_1315"; gene_id "Cuff.1315"; gene_name "Cuff.1315"; locus "RLOC_00006291";
chr13	Cufflinks_novel	exon	53550663	53550774	111	transcript_id "cuff_1315"; gene_id "Cuff.1315"; gene_name "Cuff.1315"; locus "RLOC_00006291";
chr13	Cufflinks_novel	exon	53552211	53552338	127	transcript_id "cuff_1315"; gene_id "Cuff.1315"; gene_name "Cuff.1315"; locus "RLOC_00006291";
chr13	Cufflinks_novel	exon	53546963	53547094	131	transcript_id "cuff_1315"; gene_id "Cuff.1315"; gene_name "Cuff.1315"; locus "RLOC_00006291";
chr13	Cufflinks_novel	exon	53532916	53533061	145	transcript_id "cuff_1315"; gene_id "Cuff.1315"; gene_name "Cuff.1315"; locus "RLOC_00006291";
chr13	Cufflinks_novel	exon	53546602	53546769	167	transcript_id "cuff_1315"; gene_id "Cuff.1315"; gene_name "Cuff.1315"; locus "RLOC_00006291";
chr13	Cufflinks_novel	exon	53553604	53553772	168	transcript_id "cuff_1315"; gene_id "Cuff.1315"; gene_name "Cuff.1315"; locus "RLOC_00006291";
chr13	Cufflinks_novel	exon	53545670	53545843	173	transcript_id "cuff_1315"; gene_id "Cuff.1315"; gene_name "Cuff.1315"; locus "RLOC_00006291";
chr13	Cufflinks_novel	exon	53548597	53548773	176	transcript_id "cuff_1315"; gene_id "Cuff.1315"; gene_name "Cuff.1315"; locus "RLOC_00006291";
chr13	Cufflinks_novel	exon	53538087	53538265	178	transcript_id "cuff_1315"; gene_id "Cuff.1315"; gene_name "Cuff.1315"; locus "RLOC_00006291";
chr13	Cufflinks_novel	exon	53532593	53532796	203	transcript_id "cuff_1315"; gene_id "Cuff.1315"; gene_name "Cuff.1315"; locus "RLOC_00006291";
chr13	Cufflinks_novel	exon	53542511	53542719	208	transcript_id "cuff_1315"; gene_id "Cuff.1315"; gene_name "Cuff.1315"; locus "RLOC_00006291";
chr13	Cufflinks_novel	exon	53533843	53534083	240	transcript_id "cuff_1315"; gene_id "Cuff.1315"; gene_name "Cuff.1315"; locus "RLOC_00006291";
chr13	Cufflinks_novel	exon	53538360	53538600	240	transcript_id "cuff_1315"; gene_id "Cuff.1315"; gene_name "Cuff.1315"; locus "RLOC_00006291";
chr13	Cufflinks_novel	exon	53539647	53539898	251	transcript_id "cuff_1315"; gene_id "Cuff.1315"; gene_name "Cuff.1315"; locus "RLOC_00006291";
chr13	Cufflinks_novel	exon	53542902	53543157	255	transcript_id "cuff_1315"; gene_id "Cuff.1315"; gene_name "Cuff.1315"; locus "RLOC_00006291";
chr13	Cufflinks_novel	exon	53547483	53547770	287	transcript_id "cuff_1315"; gene_id "Cuff.1315"; gene_name "Cuff.1315"; locus "RLOC_00006291";
chr13	Cufflinks_novel	exon	53533347	53533651	304	transcript_id "cuff_1315"; gene_id "Cuff.1315"; gene_name "Cuff.1315"; locus "RLOC_00006291";
chr13	Cufflinks_novel	exon	53539106	53539438	332	transcript_id "cuff_1315"; gene_id "Cuff.1315"; gene_name "Cuff.1315"; locus "RLOC_00006291";
chr13	Cufflinks_novel	exon	53542025	53542388	363	transcript_id "cuff_1315"; gene_id "Cuff.1315"; gene_name "Cuff.1315"; locus "RLOC_00006291";
chr13	Cufflinks_novel	exon	53531875	53532267	392	transcript_id "cuff_1315"; gene_id "Cuff.1315"; gene_name "Cuff.1315"; locus "RLOC_00006291";
chr13	Cufflinks_novel	exon	53543328	53543753	425	transcript_id "cuff_1315"; gene_id "Cuff.1315"; gene_name "Cuff.1315"; locus "RLOC_00006291";
chr13	Cufflinks_novel	exon	53531115	53531561	446	transcript_id "cuff_1315"; gene_id "Cuff.1315"; gene_name "Cuff.1315"; locus "RLOC_00006291";
chr13	Cufflinks_novel	exon	53529778	53530264	486	transcript_id "cuff_1315"; gene_id "Cuff.1315"; gene_name "Cuff.1315"; locus "RLOC_00006291";
chr13	Cufflinks_novel	exon	53545980	53546487	507	transcript_id "cuff_1315"; gene_id "Cuff.1315"; gene_name "Cuff.1315"; locus "RLOC_00006291";
chr13	Cufflinks_novel	exon	53536111	53536634	523	transcript_id "cuff_1315"; gene_id "Cuff.1315"; gene_name "Cuff.1315"; locus "RLOC_00006291";
chr13	Cufflinks_novel	exon	53529171	53529727	556	transcript_id "cuff_1315"; gene_id "Cuff.1315"; gene_name "Cuff.1315"; locus "RLOC_00006291";
chr13	Cufflinks_novel	exon	53534735	53535377	642	transcript_id "cuff_1315"; gene_id "Cuff.1315"; gene_name "Cuff.1315"; locus "RLOC_00006291";
chr13	Cufflinks_novel	exon	53530331	53531048	717	transcript_id "cuff_1315"; gene_id "Cuff.1315"; gene_name "Cuff.1315"; locus "RLOC_00006291";
chr13	Cufflinks_novel	exon	53536929	53537825	896	transcript_id "cuff_1315"; gene_id "Cuff.1315"; gene_name "Cuff.1315"; locus "RLOC_00006291";
chr13	Cufflinks_novel	exon	53540704	53541603	899	transcript_id "cuff_1315"; gene_id "Cuff.1315"; gene_name "Cuff.1315"; locus "RLOC_00006291";
chr13	Cufflinks_novel	exon	53549287	53550192	905	transcript_id "cuff_1315"; gene_id "Cuff.1315"; gene_name "Cuff.1315"; locus "RLOC_00006291";
chr13	Cufflinks_novel	exon	54030185	54030212	27	transcript_id "cuff_1316"; gene_id "Cuff.1316"; gene_name "Cuff.1316"; locus "RLOC_00006293";
chr13	Cufflinks_novel	exon	54031016	54031043	27	transcript_id "cuff_1316"; gene_id "Cuff.1316"; gene_name "Cuff.1316"; locus "RLOC_00006293";
chr13	Cufflinks_novel	exon	55028586	55028613	27	transcript_id "cuff_1317"; gene_id "Cuff.1317"; gene_name "Cuff.1317"; locus "RLOC_00006312";
chr13	Cufflinks_novel	exon	55028336	55028377	41	transcript_id "cuff_1317"; gene_id "Cuff.1317"; gene_name "Cuff.1317"; locus "RLOC_00006312";
chr13	Cufflinks_novel	exon	55885788	55885824	36	transcript_id "cuff_1318"; gene_id "Cuff.1318"; gene_name "Cuff.1318"; locus "RLOC_00006341";
chr13	Cufflinks_novel	exon	55885259	55885412	153	transcript_id "cuff_1318"; gene_id "Cuff.1318"; gene_name "Cuff.1318"; locus "RLOC_00006341";
chr13	Cufflinks_novel	exon	56532788	56532815	27	transcript_id "cuff_1319"; gene_id "Cuff.1319"; gene_name "Cuff.1319"; locus "RLOC_00006348";
chr13	Cufflinks_novel	exon	56529902	56529943	41	transcript_id "cuff_1319"; gene_id "Cuff.1319"; gene_name "Cuff.1319"; locus "RLOC_00006348";
chr13	Cufflinks_novel	exon	56535555	56535597	42	transcript_id "cuff_1319"; gene_id "Cuff.1319"; gene_name "Cuff.1319"; locus "RLOC_00006348";
chr13	Cufflinks_novel	exon	56527292	56527338	46	transcript_id "cuff_1319"; gene_id "Cuff.1319"; gene_name "Cuff.1319"; locus "RLOC_00006348";
chr13	Cufflinks_novel	exon	56533013	56533123	110	transcript_id "cuff_1319"; gene_id "Cuff.1319"; gene_name "Cuff.1319"; locus "RLOC_00006348";
chr13	Cufflinks_novel	exon	56527401	56527513	112	transcript_id "cuff_1319"; gene_id "Cuff.1319"; gene_name "Cuff.1319"; locus "RLOC_00006348";
chr13	Cufflinks_novel	exon	56530687	56530828	141	transcript_id "cuff_1319"; gene_id "Cuff.1319"; gene_name "Cuff.1319"; locus "RLOC_00006348";
chr13	Cufflinks_novel	exon	56531617	56531796	179	transcript_id "cuff_1319"; gene_id "Cuff.1319"; gene_name "Cuff.1319"; locus "RLOC_00006348";
chr13	Cufflinks_novel	exon	56529655	56529839	184	transcript_id "cuff_1319"; gene_id "Cuff.1319"; gene_name "Cuff.1319"; locus "RLOC_00006348";
chr13	Cufflinks_novel	exon	56533703	56533940	237	transcript_id "cuff_1319"; gene_id "Cuff.1319"; gene_name "Cuff.1319"; locus "RLOC_00006348";
chr13	Cufflinks_novel	exon	56527953	56528201	248	transcript_id "cuff_1319"; gene_id "Cuff.1319"; gene_name "Cuff.1319"; locus "RLOC_00006348";
chr13	Cufflinks_novel	exon	56530004	56530278	274	transcript_id "cuff_1319"; gene_id "Cuff.1319"; gene_name "Cuff.1319"; locus "RLOC_00006348";
chr13	Cufflinks_novel	exon	56534238	56535412	1174	transcript_id "cuff_1319"; gene_id "Cuff.1319"; gene_name "Cuff.1319"; locus "RLOC_00006348";
chr1	Cufflinks_novel	exon	59064052	59064218	166	transcript_id "cuff_132"; gene_id "Cuff.132"; gene_name "Cuff.132"; locus "RLOC_00000399";
chr1	Cufflinks_novel	exon	59063582	59063763	181	transcript_id "cuff_132"; gene_id "Cuff.132"; gene_name "Cuff.132"; locus "RLOC_00000399";
chr1	Cufflinks_novel	exon	59062976	59063194	218	transcript_id "cuff_132"; gene_id "Cuff.132"; gene_name "Cuff.132"; locus "RLOC_00000399";
chr1	Cufflinks_novel	exon	59064321	59064624	303	transcript_id "cuff_132"; gene_id "Cuff.132"; gene_name "Cuff.132"; locus "RLOC_00000399";
chr1	Cufflinks_novel	exon	59061003	59061433	430	transcript_id "cuff_132"; gene_id "Cuff.132"; gene_name "Cuff.132"; locus "RLOC_00000399";
chr1	Cufflinks_novel	exon	59060004	59060939	935	transcript_id "cuff_132"; gene_id "Cuff.132"; gene_name "Cuff.132"; locus "RLOC_00000399";
chr1	Cufflinks_novel	exon	59061513	59062918	1405	transcript_id "cuff_132"; gene_id "Cuff.132"; gene_name "Cuff.132"; locus "RLOC_00000399";
chr13	Cufflinks_novel	exon	57062218	57062245	27	transcript_id "cuff_1320"; gene_id "Cuff.1320"; gene_name "Cuff.1320"; locus "RLOC_00006356";
chr13	Cufflinks_novel	exon	57065881	57065908	27	transcript_id "cuff_1320"; gene_id "Cuff.1320"; gene_name "Cuff.1320"; locus "RLOC_00006356";
chr13	Cufflinks_novel	exon	57063417	57063452	35	transcript_id "cuff_1320"; gene_id "Cuff.1320"; gene_name "Cuff.1320"; locus "RLOC_00006356";
chr13	Cufflinks_novel	exon	57064769	57064812	43	transcript_id "cuff_1320"; gene_id "Cuff.1320"; gene_name "Cuff.1320"; locus "RLOC_00006356";
chr13	Cufflinks_novel	exon	57062676	57062722	46	transcript_id "cuff_1320"; gene_id "Cuff.1320"; gene_name "Cuff.1320"; locus "RLOC_00006356";
chr13	Cufflinks_novel	exon	57063534	57063594	60	transcript_id "cuff_1320"; gene_id "Cuff.1320"; gene_name "Cuff.1320"; locus "RLOC_00006356";
chr13	Cufflinks_novel	exon	57065192	57065414	222	transcript_id "cuff_1320"; gene_id "Cuff.1320"; gene_name "Cuff.1320"; locus "RLOC_00006356";
chr13	Cufflinks_novel	exon	57094762	57094931	169	transcript_id "cuff_1321"; gene_id "Cuff.1321"; gene_name "Cuff.1321"; locus "RLOC_00006357";
chr13	Cufflinks_novel	exon	57096256	57096503	247	transcript_id "cuff_1321"; gene_id "Cuff.1321"; gene_name "Cuff.1321"; locus "RLOC_00006357";
chr13	Cufflinks_novel	exon	57378676	57378708	32	transcript_id "cuff_1322"; gene_id "Cuff.1322"; gene_name "Cuff.1322"; locus "RLOC_00006358";
chr13	Cufflinks_novel	exon	57378764	57378806	42	transcript_id "cuff_1322"; gene_id "Cuff.1322"; gene_name "Cuff.1322"; locus "RLOC_00006358";
chr13	Cufflinks_novel	exon	57381316	57381343	27	transcript_id "cuff_1323"; gene_id "Cuff.1323"; gene_name "Cuff.1323"; locus "RLOC_00006359";
chr13	Cufflinks_novel	exon	57383110	57383137	27	transcript_id "cuff_1323"; gene_id "Cuff.1323"; gene_name "Cuff.1323"; locus "RLOC_00006359";
chr13	Cufflinks_novel	exon	57383515	57383542	27	transcript_id "cuff_1323"; gene_id "Cuff.1323"; gene_name "Cuff.1323"; locus "RLOC_00006359";
chr13	Cufflinks_novel	exon	57384935	57384962	27	transcript_id "cuff_1323"; gene_id "Cuff.1323"; gene_name "Cuff.1323"; locus "RLOC_00006359";
chr13	Cufflinks_novel	exon	58233271	58233348	77	transcript_id "cuff_1324"; gene_id "Cuff.1324"; gene_name "Cuff.1324"; locus "RLOC_00006364";
chr13	Cufflinks_novel	exon	58235247	58235340	93	transcript_id "cuff_1324"; gene_id "Cuff.1324"; gene_name "Cuff.1324"; locus "RLOC_00006364";
chr13	Cufflinks_novel	exon	58230822	58230938	116	transcript_id "cuff_1324"; gene_id "Cuff.1324"; gene_name "Cuff.1324"; locus "RLOC_00006364";
chr13	Cufflinks_novel	exon	58234838	58234994	156	transcript_id "cuff_1324"; gene_id "Cuff.1324"; gene_name "Cuff.1324"; locus "RLOC_00006364";
chr13	Cufflinks_novel	exon	58232838	58233108	270	transcript_id "cuff_1324"; gene_id "Cuff.1324"; gene_name "Cuff.1324"; locus "RLOC_00006364";
chr13	Cufflinks_novel	exon	58249893	58250038	145	transcript_id "cuff_1325"; gene_id "Cuff.1325"; gene_name "Cuff.1325"; locus "RLOC_00006365";
chr13	Cufflinks_novel	exon	58250118	58250264	146	transcript_id "cuff_1325"; gene_id "Cuff.1325"; gene_name "Cuff.1325"; locus "RLOC_00006365";
chr13	Cufflinks_novel	exon	58458792	58458821	29	transcript_id "cuff_1326"; gene_id "Cuff.1326"; gene_name "Cuff.1326"; locus "RLOC_00006370";
chr13	Cufflinks_novel	exon	58456412	58456472	60	transcript_id "cuff_1326"; gene_id "Cuff.1326"; gene_name "Cuff.1326"; locus "RLOC_00006370";
chr13	Cufflinks_novel	exon	58459732	58459805	73	transcript_id "cuff_1326"; gene_id "Cuff.1326"; gene_name "Cuff.1326"; locus "RLOC_00006370";
chr13	Cufflinks_novel	exon	58459870	58460034	164	transcript_id "cuff_1326"; gene_id "Cuff.1326"; gene_name "Cuff.1326"; locus "RLOC_00006370";
chr13	Cufflinks_novel	exon	58457763	58457998	235	transcript_id "cuff_1326"; gene_id "Cuff.1326"; gene_name "Cuff.1326"; locus "RLOC_00006370";
chr13	Cufflinks_novel	exon	58459037	58459283	246	transcript_id "cuff_1326"; gene_id "Cuff.1326"; gene_name "Cuff.1326"; locus "RLOC_00006370";
chr13	Cufflinks_novel	exon	58458459	58458737	278	transcript_id "cuff_1326"; gene_id "Cuff.1326"; gene_name "Cuff.1326"; locus "RLOC_00006370";
chr13	Cufflinks_novel	exon	58648963	58649015	52	transcript_id "cuff_1327"; gene_id "Cuff.1327"; gene_name "Cuff.1327"; locus "RLOC_00006375";
chr13	Cufflinks_novel	exon	58647578	58647746	168	transcript_id "cuff_1327"; gene_id "Cuff.1327"; gene_name "Cuff.1327"; locus "RLOC_00006375";
chr13	Cufflinks_novel	exon	58845620	58845666	46	transcript_id "cuff_1328"; gene_id "Cuff.1328"; gene_name "Cuff.1328"; locus "RLOC_00006377";
chr13	Cufflinks_novel	exon	58842575	58842760	185	transcript_id "cuff_1328"; gene_id "Cuff.1328"; gene_name "Cuff.1328"; locus "RLOC_00006377";
chr13	Cufflinks_novel	exon	58843498	58843692	194	transcript_id "cuff_1328"; gene_id "Cuff.1328"; gene_name "Cuff.1328"; locus "RLOC_00006377";
chr13	Cufflinks_novel	exon	58843004	58843201	197	transcript_id "cuff_1328"; gene_id "Cuff.1328"; gene_name "Cuff.1328"; locus "RLOC_00006377";
chr13	Cufflinks_novel	exon	58845318	58845567	249	transcript_id "cuff_1328"; gene_id "Cuff.1328"; gene_name "Cuff.1328"; locus "RLOC_00006377";
chr13	Cufflinks_novel	exon	58853847	58853867	20	transcript_id "cuff_1329"; gene_id "Cuff.1329"; gene_name "Cuff.1329"; locus "RLOC_00006378";
chr13	Cufflinks_novel	exon	58853114	58853184	70	transcript_id "cuff_1329"; gene_id "Cuff.1329"; gene_name "Cuff.1329"; locus "RLOC_00006378";
chr13	Cufflinks_novel	exon	58855550	58855666	116	transcript_id "cuff_1329"; gene_id "Cuff.1329"; gene_name "Cuff.1329"; locus "RLOC_00006378";
chr13	Cufflinks_novel	exon	58854563	58854844	281	transcript_id "cuff_1329"; gene_id "Cuff.1329"; gene_name "Cuff.1329"; locus "RLOC_00006378";
chr13	Cufflinks_novel	exon	58855193	58855490	297	transcript_id "cuff_1329"; gene_id "Cuff.1329"; gene_name "Cuff.1329"; locus "RLOC_00006378";
chr1	Cufflinks_novel	exon	59070619	59070646	27	transcript_id "cuff_133"; gene_id "Cuff.133"; gene_name "Cuff.133"; locus "RLOC_00000400";
chr1	Cufflinks_novel	exon	59070758	59070790	32	transcript_id "cuff_133"; gene_id "Cuff.133"; gene_name "Cuff.133"; locus "RLOC_00000400";
chr13	Cufflinks_novel	exon	58878838	58878865	27	transcript_id "cuff_1330"; gene_id "Cuff.1330"; gene_name "Cuff.1330"; locus "RLOC_00006379";
chr13	Cufflinks_novel	exon	58878501	58878574	73	transcript_id "cuff_1330"; gene_id "Cuff.1330"; gene_name "Cuff.1330"; locus "RLOC_00006379";
chr13	Cufflinks_novel	exon	59246229	59246256	27	transcript_id "cuff_1331"; gene_id "Cuff.1331"; gene_name "Cuff.1331"; locus "RLOC_00006381";
chr13	Cufflinks_novel	exon	59248076	59248103	27	transcript_id "cuff_1331"; gene_id "Cuff.1331"; gene_name "Cuff.1331"; locus "RLOC_00006381";
chr13	Cufflinks_novel	exon	59246005	59246141	136	transcript_id "cuff_1331"; gene_id "Cuff.1331"; gene_name "Cuff.1331"; locus "RLOC_00006381";
chr13	Cufflinks_novel	exon	59290233	59290363	130	transcript_id "cuff_1332"; gene_id "Cuff.1332"; gene_name "Cuff.1332"; locus "RLOC_00006382";
chr13	Cufflinks_novel	exon	59291793	59291925	132	transcript_id "cuff_1332"; gene_id "Cuff.1332"; gene_name "Cuff.1332"; locus "RLOC_00006382";
chr13	Cufflinks_novel	exon	59290457	59290631	174	transcript_id "cuff_1332"; gene_id "Cuff.1332"; gene_name "Cuff.1332"; locus "RLOC_00006382";
chr13	Cufflinks_novel	exon	59318233	59318260	27	transcript_id "cuff_1333"; gene_id "Cuff.1333"; gene_name "Cuff.1333"; locus "RLOC_00006383";
chr13	Cufflinks_novel	exon	59318312	59318339	27	transcript_id "cuff_1333"; gene_id "Cuff.1333"; gene_name "Cuff.1333"; locus "RLOC_00006383";
chr13	Cufflinks_novel	exon	59379644	59379720	76	transcript_id "cuff_1334"; gene_id "Cuff.1334"; gene_name "Cuff.1334"; locus "RLOC_00006384";
chr13	Cufflinks_novel	exon	59380418	59380724	306	transcript_id "cuff_1334"; gene_id "Cuff.1334"; gene_name "Cuff.1334"; locus "RLOC_00006384";
chr13	Cufflinks_novel	exon	59390409	59390518	109	transcript_id "cuff_1335"; gene_id "Cuff.1335"; gene_name "Cuff.1335"; locus "RLOC_00006385";
chr13	Cufflinks_novel	exon	59391570	59391713	143	transcript_id "cuff_1335"; gene_id "Cuff.1335"; gene_name "Cuff.1335"; locus "RLOC_00006385";
chr13	Cufflinks_novel	exon	59392881	59393095	214	transcript_id "cuff_1335"; gene_id "Cuff.1335"; gene_name "Cuff.1335"; locus "RLOC_00006385";
chr13	Cufflinks_novel	exon	59514482	59514509	27	transcript_id "cuff_1336"; gene_id "Cuff.1336"; gene_name "Cuff.1336"; locus "RLOC_00006386";
chr13	Cufflinks_novel	exon	59515218	59515298	80	transcript_id "cuff_1336"; gene_id "Cuff.1336"; gene_name "Cuff.1336"; locus "RLOC_00006386";
chr13	Cufflinks_novel	exon	59515787	59515914	127	transcript_id "cuff_1336"; gene_id "Cuff.1336"; gene_name "Cuff.1336"; locus "RLOC_00006386";
chr13	Cufflinks_novel	exon	59523442	59523469	27	transcript_id "cuff_1337"; gene_id "Cuff.1337"; gene_name "Cuff.1337"; locus "RLOC_00006387";
chr13	Cufflinks_novel	exon	59523711	59523738	27	transcript_id "cuff_1337"; gene_id "Cuff.1337"; gene_name "Cuff.1337"; locus "RLOC_00006387";
chr13	Cufflinks_novel	exon	59518489	59518588	99	transcript_id "cuff_1337"; gene_id "Cuff.1337"; gene_name "Cuff.1337"; locus "RLOC_00006387";
chr13	Cufflinks_novel	exon	59521258	59521369	111	transcript_id "cuff_1337"; gene_id "Cuff.1337"; gene_name "Cuff.1337"; locus "RLOC_00006387";
chr13	Cufflinks_novel	exon	59522786	59522903	117	transcript_id "cuff_1337"; gene_id "Cuff.1337"; gene_name "Cuff.1337"; locus "RLOC_00006387";
chr13	Cufflinks_novel	exon	59518163	59518290	127	transcript_id "cuff_1337"; gene_id "Cuff.1337"; gene_name "Cuff.1337"; locus "RLOC_00006387";
chr13	Cufflinks_novel	exon	59522320	59522521	201	transcript_id "cuff_1337"; gene_id "Cuff.1337"; gene_name "Cuff.1337"; locus "RLOC_00006387";
chr13	Cufflinks_novel	exon	59519108	59519374	266	transcript_id "cuff_1337"; gene_id "Cuff.1337"; gene_name "Cuff.1337"; locus "RLOC_00006387";
chr13	Cufflinks_novel	exon	59521773	59522058	285	transcript_id "cuff_1337"; gene_id "Cuff.1337"; gene_name "Cuff.1337"; locus "RLOC_00006387";
chr13	Cufflinks_novel	exon	59663868	59664041	173	transcript_id "cuff_1338"; gene_id "Cuff.1338"; gene_name "Cuff.1338"; locus "RLOC_00006389";
chr13	Cufflinks_novel	exon	59663572	59663816	244	transcript_id "cuff_1338"; gene_id "Cuff.1338"; gene_name "Cuff.1338"; locus "RLOC_00006389";
chr13	Cufflinks_novel	exon	59840067	59840094	27	transcript_id "cuff_1339"; gene_id "Cuff.1339"; gene_name "Cuff.1339"; locus "RLOC_00006396";
chr13	Cufflinks_novel	exon	59835561	59835615	54	transcript_id "cuff_1339"; gene_id "Cuff.1339"; gene_name "Cuff.1339"; locus "RLOC_00006396";
chr13	Cufflinks_novel	exon	59841290	59841363	73	transcript_id "cuff_1339"; gene_id "Cuff.1339"; gene_name "Cuff.1339"; locus "RLOC_00006396";
chr13	Cufflinks_novel	exon	59836483	59836592	109	transcript_id "cuff_1339"; gene_id "Cuff.1339"; gene_name "Cuff.1339"; locus "RLOC_00006396";
chr13	Cufflinks_novel	exon	59837690	59837850	160	transcript_id "cuff_1339"; gene_id "Cuff.1339"; gene_name "Cuff.1339"; locus "RLOC_00006396";
chr13	Cufflinks_novel	exon	59840241	59840418	177	transcript_id "cuff_1339"; gene_id "Cuff.1339"; gene_name "Cuff.1339"; locus "RLOC_00006396";
chr13	Cufflinks_novel	exon	59838221	59838420	199	transcript_id "cuff_1339"; gene_id "Cuff.1339"; gene_name "Cuff.1339"; locus "RLOC_00006396";
chr13	Cufflinks_novel	exon	59833336	59833560	224	transcript_id "cuff_1339"; gene_id "Cuff.1339"; gene_name "Cuff.1339"; locus "RLOC_00006396";
chr13	Cufflinks_novel	exon	59839536	59839981	445	transcript_id "cuff_1339"; gene_id "Cuff.1339"; gene_name "Cuff.1339"; locus "RLOC_00006396";
chr13	Cufflinks_novel	exon	59838628	59839078	450	transcript_id "cuff_1339"; gene_id "Cuff.1339"; gene_name "Cuff.1339"; locus "RLOC_00006396";
chr13	Cufflinks_novel	exon	59834719	59835185	466	transcript_id "cuff_1339"; gene_id "Cuff.1339"; gene_name "Cuff.1339"; locus "RLOC_00006396";
chr13	Cufflinks_novel	exon	59833841	59834499	658	transcript_id "cuff_1339"; gene_id "Cuff.1339"; gene_name "Cuff.1339"; locus "RLOC_00006396";
chr13	Cufflinks_novel	exon	59842221	59845429	3208	transcript_id "cuff_1339"; gene_id "Cuff.1339"; gene_name "Cuff.1339"; locus "RLOC_00006396";
chr1	Cufflinks_novel	exon	59082168	59082195	27	transcript_id "cuff_134"; gene_id "Cuff.134"; gene_name "Cuff.134"; locus "RLOC_00000401";
chr1	Cufflinks_novel	exon	59083218	59083245	27	transcript_id "cuff_134"; gene_id "Cuff.134"; gene_name "Cuff.134"; locus "RLOC_00000401";
chr1	Cufflinks_novel	exon	59083968	59084094	126	transcript_id "cuff_134"; gene_id "Cuff.134"; gene_name "Cuff.134"; locus "RLOC_00000401";
chr1	Cufflinks_novel	exon	59081808	59081950	142	transcript_id "cuff_134"; gene_id "Cuff.134"; gene_name "Cuff.134"; locus "RLOC_00000401";
chr1	Cufflinks_novel	exon	59082761	59082969	208	transcript_id "cuff_134"; gene_id "Cuff.134"; gene_name "Cuff.134"; locus "RLOC_00000401";
chr1	Cufflinks_novel	exon	59081226	59081476	250	transcript_id "cuff_134"; gene_id "Cuff.134"; gene_name "Cuff.134"; locus "RLOC_00000401";
chr13	Cufflinks_novel	exon	59847530	59847635	105	transcript_id "cuff_1340"; gene_id "Cuff.1340"; gene_name "Cuff.1340"; locus "RLOC_00006397";
chr13	Cufflinks_novel	exon	59847979	59848688	709	transcript_id "cuff_1340"; gene_id "Cuff.1340"; gene_name "Cuff.1340"; locus "RLOC_00006397";
chr13	Cufflinks_novel	exon	60173277	60173304	27	transcript_id "cuff_1341"; gene_id "Cuff.1341"; gene_name "Cuff.1341"; locus "RLOC_00006401";
chr13	Cufflinks_novel	exon	60172591	60172690	99	transcript_id "cuff_1341"; gene_id "Cuff.1341"; gene_name "Cuff.1341"; locus "RLOC_00006401";
chr13	Cufflinks_novel	exon	63778914	63778941	27	transcript_id "cuff_1342"; gene_id "Cuff.1342"; gene_name "Cuff.1342"; locus "RLOC_00006438";
chr13	Cufflinks_novel	exon	63778782	63778824	42	transcript_id "cuff_1342"; gene_id "Cuff.1342"; gene_name "Cuff.1342"; locus "RLOC_00006438";
chr13	Cufflinks_novel	exon	63777155	63777256	101	transcript_id "cuff_1342"; gene_id "Cuff.1342"; gene_name "Cuff.1342"; locus "RLOC_00006438";
chr13	Cufflinks_novel	exon	63809189	63809216	27	transcript_id "cuff_1343"; gene_id "Cuff.1343"; gene_name "Cuff.1343"; locus "RLOC_00006439";
chr13	Cufflinks_novel	exon	63809481	63809508	27	transcript_id "cuff_1343"; gene_id "Cuff.1343"; gene_name "Cuff.1343"; locus "RLOC_00006439";
chr13	Cufflinks_novel	exon	64262991	64263018	27	transcript_id "cuff_1344"; gene_id "Cuff.1344"; gene_name "Cuff.1344"; locus "RLOC_00006444";
chr13	Cufflinks_novel	exon	64262671	64262863	192	transcript_id "cuff_1344"; gene_id "Cuff.1344"; gene_name "Cuff.1344"; locus "RLOC_00006444";
chr13	Cufflinks_novel	exon	64376458	64376539	81	transcript_id "cuff_1345"; gene_id "Cuff.1345"; gene_name "Cuff.1345"; locus "RLOC_00006447";
chr13	Cufflinks_novel	exon	64377222	64377328	106	transcript_id "cuff_1345"; gene_id "Cuff.1345"; gene_name "Cuff.1345"; locus "RLOC_00006447";
chr13	Cufflinks_novel	exon	64612356	64612408	52	transcript_id "cuff_1346"; gene_id "Cuff.1346"; gene_name "Cuff.1346"; locus "RLOC_00006452";
chr13	Cufflinks_novel	exon	64612033	64612167	134	transcript_id "cuff_1346"; gene_id "Cuff.1346"; gene_name "Cuff.1346"; locus "RLOC_00006452";
chr13	Cufflinks_novel	exon	64611589	64611830	241	transcript_id "cuff_1346"; gene_id "Cuff.1346"; gene_name "Cuff.1346"; locus "RLOC_00006452";
chr13	Cufflinks_novel	exon	65344795	65344828	33	transcript_id "cuff_1347"; gene_id "Cuff.1347"; gene_name "Cuff.1347"; locus "RLOC_00006459";
chr13	Cufflinks_novel	exon	65342141	65342289	148	transcript_id "cuff_1347"; gene_id "Cuff.1347"; gene_name "Cuff.1347"; locus "RLOC_00006459";
chr13	Cufflinks_novel	exon	65344527	65344683	156	transcript_id "cuff_1347"; gene_id "Cuff.1347"; gene_name "Cuff.1347"; locus "RLOC_00006459";
chr13	Cufflinks_novel	exon	65343892	65344093	201	transcript_id "cuff_1347"; gene_id "Cuff.1347"; gene_name "Cuff.1347"; locus "RLOC_00006459";
chr13	Cufflinks_novel	exon	65343421	65343634	213	transcript_id "cuff_1347"; gene_id "Cuff.1347"; gene_name "Cuff.1347"; locus "RLOC_00006459";
chr13	Cufflinks_novel	exon	65341551	65341804	253	transcript_id "cuff_1347"; gene_id "Cuff.1347"; gene_name "Cuff.1347"; locus "RLOC_00006459";
chr13	Cufflinks_novel	exon	65342396	65343338	942	transcript_id "cuff_1347"; gene_id "Cuff.1347"; gene_name "Cuff.1347"; locus "RLOC_00006459";
chr13	Cufflinks_novel	exon	65361536	65361563	27	transcript_id "cuff_1348"; gene_id "Cuff.1348"; gene_name "Cuff.1348"; locus "RLOC_00006460";
chr13	Cufflinks_novel	exon	65360052	65360144	92	transcript_id "cuff_1348"; gene_id "Cuff.1348"; gene_name "Cuff.1348"; locus "RLOC_00006460";
chr13	Cufflinks_novel	exon	65360764	65360857	93	transcript_id "cuff_1348"; gene_id "Cuff.1348"; gene_name "Cuff.1348"; locus "RLOC_00006460";
chr13	Cufflinks_novel	exon	65360932	65361050	118	transcript_id "cuff_1348"; gene_id "Cuff.1348"; gene_name "Cuff.1348"; locus "RLOC_00006460";
chr13	Cufflinks_novel	exon	65357788	65358125	337	transcript_id "cuff_1348"; gene_id "Cuff.1348"; gene_name "Cuff.1348"; locus "RLOC_00006460";
chr13	Cufflinks_novel	exon	67112427	67112454	27	transcript_id "cuff_1349"; gene_id "Cuff.1349"; gene_name "Cuff.1349"; locus "RLOC_00006467";
chr13	Cufflinks_novel	exon	67112811	67113027	216	transcript_id "cuff_1349"; gene_id "Cuff.1349"; gene_name "Cuff.1349"; locus "RLOC_00006467";
chr1	Cufflinks_novel	exon	59094055	59094439	384	transcript_id "cuff_135"; gene_id "Cuff.135"; gene_name "Cuff.135"; locus "RLOC_00000402";
chr1	Cufflinks_novel	exon	59092867	59093264	397	transcript_id "cuff_135"; gene_id "Cuff.135"; gene_name "Cuff.135"; locus "RLOC_00000402";
chr13	Cufflinks_novel	exon	67135292	67135336	44	transcript_id "cuff_1350"; gene_id "Cuff.1350"; gene_name "Cuff.1350"; locus "RLOC_00006468";
chr13	Cufflinks_novel	exon	67137069	67137152	83	transcript_id "cuff_1350"; gene_id "Cuff.1350"; gene_name "Cuff.1350"; locus "RLOC_00006468";
chr13	Cufflinks_novel	exon	67209676	67209703	27	transcript_id "cuff_1351"; gene_id "Cuff.1351"; gene_name "Cuff.1351"; locus "RLOC_00006471";
chr13	Cufflinks_novel	exon	67209396	67209496	100	transcript_id "cuff_1351"; gene_id "Cuff.1351"; gene_name "Cuff.1351"; locus "RLOC_00006471";
chr13	Cufflinks_novel	exon	67225741	67225837	96	transcript_id "cuff_1352"; gene_id "Cuff.1352"; gene_name "Cuff.1352"; locus "RLOC_00006472";
chr13	Cufflinks_novel	exon	67227163	67227260	97	transcript_id "cuff_1352"; gene_id "Cuff.1352"; gene_name "Cuff.1352"; locus "RLOC_00006472";
chr13	Cufflinks_novel	exon	67225438	67225613	175	transcript_id "cuff_1352"; gene_id "Cuff.1352"; gene_name "Cuff.1352"; locus "RLOC_00006472";
chr13	Cufflinks_novel	exon	67930660	67930687	27	transcript_id "cuff_1353"; gene_id "Cuff.1353"; gene_name "Cuff.1353"; locus "RLOC_00006496";
chr13	Cufflinks_novel	exon	67931659	67931858	199	transcript_id "cuff_1353"; gene_id "Cuff.1353"; gene_name "Cuff.1353"; locus "RLOC_00006496";
chr13	Cufflinks_novel	exon	67938540	67938599	59	transcript_id "cuff_1354"; gene_id "Cuff.1354"; gene_name "Cuff.1354"; locus "RLOC_00006497";
chr13	Cufflinks_novel	exon	67937203	67937325	122	transcript_id "cuff_1354"; gene_id "Cuff.1354"; gene_name "Cuff.1354"; locus "RLOC_00006497";
chr13	Cufflinks_novel	exon	67937760	67937928	168	transcript_id "cuff_1354"; gene_id "Cuff.1354"; gene_name "Cuff.1354"; locus "RLOC_00006497";
chr13	Cufflinks_novel	exon	67937412	67937683	271	transcript_id "cuff_1354"; gene_id "Cuff.1354"; gene_name "Cuff.1354"; locus "RLOC_00006497";
chr13	Cufflinks_novel	exon	67940392	67940788	396	transcript_id "cuff_1354"; gene_id "Cuff.1354"; gene_name "Cuff.1354"; locus "RLOC_00006497";
chr13	Cufflinks_novel	exon	67944660	67944688	28	transcript_id "cuff_1355"; gene_id "Cuff.1355"; gene_name "Cuff.1355"; locus "RLOC_00006498";
chr13	Cufflinks_novel	exon	67944753	67944791	38	transcript_id "cuff_1355"; gene_id "Cuff.1355"; gene_name "Cuff.1355"; locus "RLOC_00006498";
chr13	Cufflinks_novel	exon	67944272	67944382	110	transcript_id "cuff_1355"; gene_id "Cuff.1355"; gene_name "Cuff.1355"; locus "RLOC_00006498";
chr13	Cufflinks_novel	exon	67944437	67944605	168	transcript_id "cuff_1355"; gene_id "Cuff.1355"; gene_name "Cuff.1355"; locus "RLOC_00006498";
chr13	Cufflinks_novel	exon	67943917	67944201	284	transcript_id "cuff_1355"; gene_id "Cuff.1355"; gene_name "Cuff.1355"; locus "RLOC_00006498";
chr13	Cufflinks_novel	exon	69282624	69282796	172	transcript_id "cuff_1356"; gene_id "Cuff.1356"; gene_name "Cuff.1356"; locus "RLOC_00006504";
chr13	Cufflinks_novel	exon	69282289	69282565	276	transcript_id "cuff_1356"; gene_id "Cuff.1356"; gene_name "Cuff.1356"; locus "RLOC_00006504";
chr13	Cufflinks_novel	exon	69420230	69420313	83	transcript_id "cuff_1357"; gene_id "Cuff.1357"; gene_name "Cuff.1357"; locus "RLOC_00006505";
chr13	Cufflinks_novel	exon	69420511	69420731	220	transcript_id "cuff_1357"; gene_id "Cuff.1357"; gene_name "Cuff.1357"; locus "RLOC_00006505";
chr13	Cufflinks_novel	exon	69536052	69536079	27	transcript_id "cuff_1358"; gene_id "Cuff.1358"; gene_name "Cuff.1358"; locus "RLOC_00006506";
chr13	Cufflinks_novel	exon	69534461	69534499	38	transcript_id "cuff_1358"; gene_id "Cuff.1358"; gene_name "Cuff.1358"; locus "RLOC_00006506";
chr13	Cufflinks_novel	exon	69535101	69535143	42	transcript_id "cuff_1358"; gene_id "Cuff.1358"; gene_name "Cuff.1358"; locus "RLOC_00006506";
chr13	Cufflinks_novel	exon	69911295	69911500	205	transcript_id "cuff_1359"; gene_id "Cuff.1359"; gene_name "Cuff.1359"; locus "RLOC_00006511";
chr13	Cufflinks_novel	exon	69910471	69911085	614	transcript_id "cuff_1359"; gene_id "Cuff.1359"; gene_name "Cuff.1359"; locus "RLOC_00006511";
chr1	Cufflinks_novel	exon	59513352	59513379	27	transcript_id "cuff_136"; gene_id "Cuff.136"; gene_name "Cuff.136"; locus "RLOC_00000407";
chr1	Cufflinks_novel	exon	59513828	59513880	52	transcript_id "cuff_136"; gene_id "Cuff.136"; gene_name "Cuff.136"; locus "RLOC_00000407";
chr13	Cufflinks_novel	exon	70069227	70069246	19	transcript_id "cuff_1360"; gene_id "Cuff.1360"; gene_name "Cuff.1360"; locus "RLOC_00006513";
chr13	Cufflinks_novel	exon	70067768	70067839	71	transcript_id "cuff_1360"; gene_id "Cuff.1360"; gene_name "Cuff.1360"; locus "RLOC_00006513";
chr13	Cufflinks_novel	exon	70067992	70068097	105	transcript_id "cuff_1360"; gene_id "Cuff.1360"; gene_name "Cuff.1360"; locus "RLOC_00006513";
chr13	Cufflinks_novel	exon	70072003	70072113	110	transcript_id "cuff_1360"; gene_id "Cuff.1360"; gene_name "Cuff.1360"; locus "RLOC_00006513";
chr13	Cufflinks_novel	exon	70070883	70071028	145	transcript_id "cuff_1360"; gene_id "Cuff.1360"; gene_name "Cuff.1360"; locus "RLOC_00006513";
chr13	Cufflinks_novel	exon	70073001	70073216	215	transcript_id "cuff_1360"; gene_id "Cuff.1360"; gene_name "Cuff.1360"; locus "RLOC_00006513";
chr13	Cufflinks_novel	exon	70100993	70101020	27	transcript_id "cuff_1361"; gene_id "Cuff.1361"; gene_name "Cuff.1361"; locus "RLOC_00006514";
chr13	Cufflinks_novel	exon	70101084	70101111	27	transcript_id "cuff_1361"; gene_id "Cuff.1361"; gene_name "Cuff.1361"; locus "RLOC_00006514";
chr13	Cufflinks_novel	exon	70103386	70103413	27	transcript_id "cuff_1361"; gene_id "Cuff.1361"; gene_name "Cuff.1361"; locus "RLOC_00006514";
chr13	Cufflinks_novel	exon	70101533	70101627	94	transcript_id "cuff_1361"; gene_id "Cuff.1361"; gene_name "Cuff.1361"; locus "RLOC_00006514";
chr13	Cufflinks_novel	exon	70098749	70099007	258	transcript_id "cuff_1361"; gene_id "Cuff.1361"; gene_name "Cuff.1361"; locus "RLOC_00006514";
chr13	Cufflinks_novel	exon	70100534	70100870	336	transcript_id "cuff_1361"; gene_id "Cuff.1361"; gene_name "Cuff.1361"; locus "RLOC_00006514";
chr13	Cufflinks_novel	exon	70143220	70143365	145	transcript_id "cuff_1362"; gene_id "Cuff.1362"; gene_name "Cuff.1362"; locus "RLOC_00006515";
chr13	Cufflinks_novel	exon	70142931	70143100	169	transcript_id "cuff_1362"; gene_id "Cuff.1362"; gene_name "Cuff.1362"; locus "RLOC_00006515";
chr13	Cufflinks_novel	exon	70151707	70151734	27	transcript_id "cuff_1363"; gene_id "Cuff.1363"; gene_name "Cuff.1363"; locus "RLOC_00006516";
chr13	Cufflinks_novel	exon	70152376	70152403	27	transcript_id "cuff_1363"; gene_id "Cuff.1363"; gene_name "Cuff.1363"; locus "RLOC_00006516";
chr13	Cufflinks_novel	exon	70150603	70150807	204	transcript_id "cuff_1363"; gene_id "Cuff.1363"; gene_name "Cuff.1363"; locus "RLOC_00006516";
chr13	Cufflinks_novel	exon	70155027	70155214	187	transcript_id "cuff_1364"; gene_id "Cuff.1364"; gene_name "Cuff.1364"; locus "RLOC_00006517";
chr13	Cufflinks_novel	exon	70155292	70155504	212	transcript_id "cuff_1364"; gene_id "Cuff.1364"; gene_name "Cuff.1364"; locus "RLOC_00006517";
chr13	Cufflinks_novel	exon	70159179	70159295	116	transcript_id "cuff_1365"; gene_id "Cuff.1365"; gene_name "Cuff.1365"; locus "RLOC_00006518";
chr13	Cufflinks_novel	exon	70159630	70159783	153	transcript_id "cuff_1365"; gene_id "Cuff.1365"; gene_name "Cuff.1365"; locus "RLOC_00006518";
chr13	Cufflinks_novel	exon	70165667	70165694	27	transcript_id "cuff_1366"; gene_id "Cuff.1366"; gene_name "Cuff.1366"; locus "RLOC_00006519";
chr13	Cufflinks_novel	exon	70166713	70166773	60	transcript_id "cuff_1366"; gene_id "Cuff.1366"; gene_name "Cuff.1366"; locus "RLOC_00006519";
chr13	Cufflinks_novel	exon	70167360	70167462	102	transcript_id "cuff_1366"; gene_id "Cuff.1366"; gene_name "Cuff.1366"; locus "RLOC_00006519";
chr13	Cufflinks_novel	exon	70166840	70167231	391	transcript_id "cuff_1366"; gene_id "Cuff.1366"; gene_name "Cuff.1366"; locus "RLOC_00006519";
chr13	Cufflinks_novel	exon	70170412	70170507	95	transcript_id "cuff_1367"; gene_id "Cuff.1367"; gene_name "Cuff.1367"; locus "RLOC_00006520";
chr13	Cufflinks_novel	exon	70172162	70172332	170	transcript_id "cuff_1367"; gene_id "Cuff.1367"; gene_name "Cuff.1367"; locus "RLOC_00006520";
chr13	Cufflinks_novel	exon	70716139	70716166	27	transcript_id "cuff_1368"; gene_id "Cuff.1368"; gene_name "Cuff.1368"; locus "RLOC_00006521";
chr13	Cufflinks_novel	exon	70713320	70713507	187	transcript_id "cuff_1368"; gene_id "Cuff.1368"; gene_name "Cuff.1368"; locus "RLOC_00006521";
chr13	Cufflinks_novel	exon	70714594	70714878	284	transcript_id "cuff_1368"; gene_id "Cuff.1368"; gene_name "Cuff.1368"; locus "RLOC_00006521";
chr13	Cufflinks_novel	exon	71651251	71651278	27	transcript_id "cuff_1369"; gene_id "Cuff.1369"; gene_name "Cuff.1369"; locus "RLOC_00006524";
chr13	Cufflinks_novel	exon	71652745	71652911	166	transcript_id "cuff_1369"; gene_id "Cuff.1369"; gene_name "Cuff.1369"; locus "RLOC_00006524";
chr1	Cufflinks_novel	exon	60761827	60761911	84	transcript_id "cuff_137"; gene_id "Cuff.137"; gene_name "Cuff.137"; locus "RLOC_00000423";
chr1	Cufflinks_novel	exon	60760775	60760888	113	transcript_id "cuff_137"; gene_id "Cuff.137"; gene_name "Cuff.137"; locus "RLOC_00000423";
chr13	Cufflinks_novel	exon	72976372	72976399	27	transcript_id "cuff_1370"; gene_id "Cuff.1370"; gene_name "Cuff.1370"; locus "RLOC_00006528";
chr13	Cufflinks_novel	exon	72974571	72974628	57	transcript_id "cuff_1370"; gene_id "Cuff.1370"; gene_name "Cuff.1370"; locus "RLOC_00006528";
chr13	Cufflinks_novel	exon	72975604	72975708	104	transcript_id "cuff_1370"; gene_id "Cuff.1370"; gene_name "Cuff.1370"; locus "RLOC_00006528";
chr13	Cufflinks_novel	exon	74036058	74036085	27	transcript_id "cuff_1371"; gene_id "Cuff.1371"; gene_name "Cuff.1371"; locus "RLOC_00006540";
chr13	Cufflinks_novel	exon	74036955	74036982	27	transcript_id "cuff_1371"; gene_id "Cuff.1371"; gene_name "Cuff.1371"; locus "RLOC_00006540";
chr13	Cufflinks_novel	exon	74100782	74100911	129	transcript_id "cuff_1372"; gene_id "Cuff.1372"; gene_name "Cuff.1372"; locus "RLOC_00006543";
chr13	Cufflinks_novel	exon	74101006	74101215	209	transcript_id "cuff_1372"; gene_id "Cuff.1372"; gene_name "Cuff.1372"; locus "RLOC_00006543";
chr13	Cufflinks_novel	exon	74755295	74755322	27	transcript_id "cuff_1373"; gene_id "Cuff.1373"; gene_name "Cuff.1373"; locus "RLOC_00006556";
chr13	Cufflinks_novel	exon	74754686	74754735	49	transcript_id "cuff_1373"; gene_id "Cuff.1373"; gene_name "Cuff.1373"; locus "RLOC_00006556";
chr13	Cufflinks_novel	exon	76372734	76372761	27	transcript_id "cuff_1374"; gene_id "Cuff.1374"; gene_name "Cuff.1374"; locus "RLOC_00006569";
chr13	Cufflinks_novel	exon	76372392	76372454	62	transcript_id "cuff_1374"; gene_id "Cuff.1374"; gene_name "Cuff.1374"; locus "RLOC_00006569";
chr13	Cufflinks_novel	exon	79093867	79093932	65	transcript_id "cuff_1375"; gene_id "Cuff.1375"; gene_name "Cuff.1375"; locus "RLOC_00006576";
chr13	Cufflinks_novel	exon	79093044	79093265	221	transcript_id "cuff_1375"; gene_id "Cuff.1375"; gene_name "Cuff.1375"; locus "RLOC_00006576";
chr13	Cufflinks_novel	exon	81099916	81100055	139	transcript_id "cuff_1376"; gene_id "Cuff.1376"; gene_name "Cuff.1376"; locus "RLOC_00006578";
chr13	Cufflinks_novel	exon	81098268	81098449	181	transcript_id "cuff_1376"; gene_id "Cuff.1376"; gene_name "Cuff.1376"; locus "RLOC_00006578";
chr13	Cufflinks_novel	exon	83217773	83217867	94	transcript_id "cuff_1377"; gene_id "Cuff.1377"; gene_name "Cuff.1377"; locus "RLOC_00006585";
chr13	Cufflinks_novel	exon	83215826	83215930	104	transcript_id "cuff_1377"; gene_id "Cuff.1377"; gene_name "Cuff.1377"; locus "RLOC_00006585";
chr13	Cufflinks_novel	exon	83213690	83213893	203	transcript_id "cuff_1377"; gene_id "Cuff.1377"; gene_name "Cuff.1377"; locus "RLOC_00006585";
chr13	Cufflinks_novel	exon	86004875	86004935	60	transcript_id "cuff_1378"; gene_id "Cuff.1378"; gene_name "Cuff.1378"; locus "RLOC_00006592";
chr13	Cufflinks_novel	exon	86004720	86004811	91	transcript_id "cuff_1378"; gene_id "Cuff.1378"; gene_name "Cuff.1378"; locus "RLOC_00006592";
chr13	Cufflinks_novel	exon	86150526	86150553	27	transcript_id "cuff_1379"; gene_id "Cuff.1379"; gene_name "Cuff.1379"; locus "RLOC_00006593";
chr13	Cufflinks_novel	exon	86152408	86152435	27	transcript_id "cuff_1379"; gene_id "Cuff.1379"; gene_name "Cuff.1379"; locus "RLOC_00006593";
chr1	Cufflinks_novel	exon	60987874	60987901	27	transcript_id "cuff_138"; gene_id "Cuff.138"; gene_name "Cuff.138"; locus "RLOC_00000426";
chr1	Cufflinks_novel	exon	60986622	60986714	92	transcript_id "cuff_138"; gene_id "Cuff.138"; gene_name "Cuff.138"; locus "RLOC_00000426";
chr13	Cufflinks_novel	exon	86878358	86878385	27	transcript_id "cuff_1380"; gene_id "Cuff.1380"; gene_name "Cuff.1380"; locus "RLOC_00006595";
chr13	Cufflinks_novel	exon	86879529	86879587	58	transcript_id "cuff_1380"; gene_id "Cuff.1380"; gene_name "Cuff.1380"; locus "RLOC_00006595";
chr13	Cufflinks_novel	exon	88662142	88662192	50	transcript_id "cuff_1381"; gene_id "Cuff.1381"; gene_name "Cuff.1381"; locus "RLOC_00006596";
chr13	Cufflinks_novel	exon	88660969	88661043	74	transcript_id "cuff_1381"; gene_id "Cuff.1381"; gene_name "Cuff.1381"; locus "RLOC_00006596";
chr13	Cufflinks_novel	exon	88687026	88687129	103	transcript_id "cuff_1382"; gene_id "Cuff.1382"; gene_name "Cuff.1382"; locus "RLOC_00006597";
chr13	Cufflinks_novel	exon	88687205	88687424	219	transcript_id "cuff_1382"; gene_id "Cuff.1382"; gene_name "Cuff.1382"; locus "RLOC_00006597";
chr13	Cufflinks_novel	exon	88686191	88686427	236	transcript_id "cuff_1382"; gene_id "Cuff.1382"; gene_name "Cuff.1382"; locus "RLOC_00006597";
chr13	Cufflinks_novel	exon	88699399	88699446	47	transcript_id "cuff_1383"; gene_id "Cuff.1383"; gene_name "Cuff.1383"; locus "RLOC_00006598";
chr13	Cufflinks_novel	exon	88700377	88700449	72	transcript_id "cuff_1383"; gene_id "Cuff.1383"; gene_name "Cuff.1383"; locus "RLOC_00006598";
chr13	Cufflinks_novel	exon	88697888	88698046	158	transcript_id "cuff_1383"; gene_id "Cuff.1383"; gene_name "Cuff.1383"; locus "RLOC_00006598";
chr13	Cufflinks_novel	exon	91402186	91402213	27	transcript_id "cuff_1384"; gene_id "Cuff.1384"; gene_name "Cuff.1384"; locus "RLOC_00006607";
chr13	Cufflinks_novel	exon	91401581	91401630	49	transcript_id "cuff_1384"; gene_id "Cuff.1384"; gene_name "Cuff.1384"; locus "RLOC_00006607";
chr13	Cufflinks_novel	exon	91414992	91415019	27	transcript_id "cuff_1385"; gene_id "Cuff.1385"; gene_name "Cuff.1385"; locus "RLOC_00006608";
chr13	Cufflinks_novel	exon	91413832	91414187	355	transcript_id "cuff_1385"; gene_id "Cuff.1385"; gene_name "Cuff.1385"; locus "RLOC_00006608";
chr13	Cufflinks_novel	exon	93675365	93675392	27	transcript_id "cuff_1386"; gene_id "Cuff.1386"; gene_name "Cuff.1386"; locus "RLOC_00006624";
chr13	Cufflinks_novel	exon	93676321	93676474	153	transcript_id "cuff_1386"; gene_id "Cuff.1386"; gene_name "Cuff.1386"; locus "RLOC_00006624";
chr13	Cufflinks_novel	exon	94069631	94069658	27	transcript_id "cuff_1387"; gene_id "Cuff.1387"; gene_name "Cuff.1387"; locus "RLOC_00006628";
chr13	Cufflinks_novel	exon	94071263	94071290	27	transcript_id "cuff_1387"; gene_id "Cuff.1387"; gene_name "Cuff.1387"; locus "RLOC_00006628";
chr13	Cufflinks_novel	exon	94201713	94201740	27	transcript_id "cuff_1388"; gene_id "Cuff.1388"; gene_name "Cuff.1388"; locus "RLOC_00006630";
chr13	Cufflinks_novel	exon	94200852	94201062	210	transcript_id "cuff_1388"; gene_id "Cuff.1388"; gene_name "Cuff.1388"; locus "RLOC_00006630";
chr13	Cufflinks_novel	exon	94368206	94368234	28	transcript_id "cuff_1389"; gene_id "Cuff.1389"; gene_name "Cuff.1389"; locus "RLOC_00006632";
chr13	Cufflinks_novel	exon	94367969	94368105	136	transcript_id "cuff_1389"; gene_id "Cuff.1389"; gene_name "Cuff.1389"; locus "RLOC_00006632";
chr1	Cufflinks_novel	exon	61667657	61667684	27	transcript_id "cuff_139"; gene_id "Cuff.139"; gene_name "Cuff.139"; locus "RLOC_00000428";
chr1	Cufflinks_novel	exon	61666863	61666912	49	transcript_id "cuff_139"; gene_id "Cuff.139"; gene_name "Cuff.139"; locus "RLOC_00000428";
chr1	Cufflinks_novel	exon	61667433	61667587	154	transcript_id "cuff_139"; gene_id "Cuff.139"; gene_name "Cuff.139"; locus "RLOC_00000428";
chr13	Cufflinks_novel	exon	96198608	96198635	27	transcript_id "cuff_1390"; gene_id "Cuff.1390"; gene_name "Cuff.1390"; locus "RLOC_00006647";
chr13	Cufflinks_novel	exon	96198018	96198122	104	transcript_id "cuff_1390"; gene_id "Cuff.1390"; gene_name "Cuff.1390"; locus "RLOC_00006647";
chr13	Cufflinks_novel	exon	96724725	96724752	27	transcript_id "cuff_1391"; gene_id "Cuff.1391"; gene_name "Cuff.1391"; locus "RLOC_00006654";
chr13	Cufflinks_novel	exon	96725330	96725357	27	transcript_id "cuff_1391"; gene_id "Cuff.1391"; gene_name "Cuff.1391"; locus "RLOC_00006654";
chr13	Cufflinks_novel	exon	96727158	96727185	27	transcript_id "cuff_1391"; gene_id "Cuff.1391"; gene_name "Cuff.1391"; locus "RLOC_00006654";
chr13	Cufflinks_novel	exon	97557163	97557278	115	transcript_id "cuff_1392"; gene_id "Cuff.1392"; gene_name "Cuff.1392"; locus "RLOC_00006661";
chr13	Cufflinks_novel	exon	97556511	97556743	232	transcript_id "cuff_1392"; gene_id "Cuff.1392"; gene_name "Cuff.1392"; locus "RLOC_00006661";
chr13	Cufflinks_novel	exon	97566112	97566249	137	transcript_id "cuff_1393"; gene_id "Cuff.1393"; gene_name "Cuff.1393"; locus "RLOC_00006662";
chr13	Cufflinks_novel	exon	97565689	97566058	369	transcript_id "cuff_1393"; gene_id "Cuff.1393"; gene_name "Cuff.1393"; locus "RLOC_00006662";
chr13	Cufflinks_novel	exon	97568599	97568752	153	transcript_id "cuff_1394"; gene_id "Cuff.1394"; gene_name "Cuff.1394"; locus "RLOC_00006663";
chr13	Cufflinks_novel	exon	97569502	97569669	167	transcript_id "cuff_1394"; gene_id "Cuff.1394"; gene_name "Cuff.1394"; locus "RLOC_00006663";
chr13	Cufflinks_novel	exon	97601853	97601880	27	transcript_id "cuff_1395"; gene_id "Cuff.1395"; gene_name "Cuff.1395"; locus "RLOC_00006664";
chr13	Cufflinks_novel	exon	97601470	97601538	68	transcript_id "cuff_1395"; gene_id "Cuff.1395"; gene_name "Cuff.1395"; locus "RLOC_00006664";
chr13	Cufflinks_novel	exon	97602091	97602354	263	transcript_id "cuff_1395"; gene_id "Cuff.1395"; gene_name "Cuff.1395"; locus "RLOC_00006664";
chr13	Cufflinks_novel	exon	97602422	97602709	287	transcript_id "cuff_1395"; gene_id "Cuff.1395"; gene_name "Cuff.1395"; locus "RLOC_00006664";
chr13	Cufflinks_novel	exon	97622552	97622679	127	transcript_id "cuff_1396"; gene_id "Cuff.1396"; gene_name "Cuff.1396"; locus "RLOC_00006665";
chr13	Cufflinks_novel	exon	97619862	97620032	170	transcript_id "cuff_1396"; gene_id "Cuff.1396"; gene_name "Cuff.1396"; locus "RLOC_00006665";
chr13	Cufflinks_novel	exon	97621591	97621823	232	transcript_id "cuff_1396"; gene_id "Cuff.1396"; gene_name "Cuff.1396"; locus "RLOC_00006665";
chr13	Cufflinks_novel	exon	97648417	97648454	37	transcript_id "cuff_1397"; gene_id "Cuff.1397"; gene_name "Cuff.1397"; locus "RLOC_00006666";
chr13	Cufflinks_novel	exon	97648100	97648292	192	transcript_id "cuff_1397"; gene_id "Cuff.1397"; gene_name "Cuff.1397"; locus "RLOC_00006666";
chr13	Cufflinks_novel	exon	97648525	97649073	548	transcript_id "cuff_1397"; gene_id "Cuff.1397"; gene_name "Cuff.1397"; locus "RLOC_00006666";
chr13	Cufflinks_novel	exon	98479847	98479887	40	transcript_id "cuff_1398"; gene_id "Cuff.1398"; gene_name "Cuff.1398"; locus "RLOC_00006674";
chr13	Cufflinks_novel	exon	98482324	98482438	114	transcript_id "cuff_1398"; gene_id "Cuff.1398"; gene_name "Cuff.1398"; locus "RLOC_00006674";
chr13	Cufflinks_novel	exon	98480995	98481153	158	transcript_id "cuff_1398"; gene_id "Cuff.1398"; gene_name "Cuff.1398"; locus "RLOC_00006674";
chr13	Cufflinks_novel	exon	98481496	98481654	158	transcript_id "cuff_1398"; gene_id "Cuff.1398"; gene_name "Cuff.1398"; locus "RLOC_00006674";
chr13	Cufflinks_novel	exon	99369569	99369596	27	transcript_id "cuff_1399"; gene_id "Cuff.1399"; gene_name "Cuff.1399"; locus "RLOC_00006680";
chr13	Cufflinks_novel	exon	99370421	99370450	29	transcript_id "cuff_1399"; gene_id "Cuff.1399"; gene_name "Cuff.1399"; locus "RLOC_00006680";
chr1	Cufflinks_novel	exon	14350931	14350986	55	transcript_id "cuff_14"; gene_id "Cuff.14"; gene_name "Cuff.14"; locus "RLOC_00000055";
chr1	Cufflinks_novel	exon	14350382	14350525	143	transcript_id "cuff_14"; gene_id "Cuff.14"; gene_name "Cuff.14"; locus "RLOC_00000055";
chr1	Cufflinks_novel	exon	63296816	63296887	71	transcript_id "cuff_140"; gene_id "Cuff.140"; gene_name "Cuff.140"; locus "RLOC_00000436";
chr1	Cufflinks_novel	exon	63298323	63298477	154	transcript_id "cuff_140"; gene_id "Cuff.140"; gene_name "Cuff.140"; locus "RLOC_00000436";
chr1	Cufflinks_novel	exon	63295340	63295497	157	transcript_id "cuff_140"; gene_id "Cuff.140"; gene_name "Cuff.140"; locus "RLOC_00000436";
chr13	Cufflinks_novel	exon	100874104	100874131	27	transcript_id "cuff_1400"; gene_id "Cuff.1400"; gene_name "Cuff.1400"; locus "RLOC_00006694";
chr13	Cufflinks_novel	exon	100874184	100874238	54	transcript_id "cuff_1400"; gene_id "Cuff.1400"; gene_name "Cuff.1400"; locus "RLOC_00006694";
chr13	Cufflinks_novel	exon	100894171	100894741	570	transcript_id "cuff_1401"; gene_id "Cuff.1401"; gene_name "Cuff.1401"; locus "RLOC_00006696";
chr13	Cufflinks_novel	exon	102053675	102053742	67	transcript_id "cuff_1402"; gene_id "Cuff.1402"; gene_name "Cuff.1402"; locus "RLOC_00006713";
chr13	Cufflinks_novel	exon	102054139	102054350	211	transcript_id "cuff_1402"; gene_id "Cuff.1402"; gene_name "Cuff.1402"; locus "RLOC_00006713";
chr13	Cufflinks_novel	exon	102062759	102062786	27	transcript_id "cuff_1403"; gene_id "Cuff.1403"; gene_name "Cuff.1403"; locus "RLOC_00006714";
chr13	Cufflinks_novel	exon	102064030	102064099	69	transcript_id "cuff_1403"; gene_id "Cuff.1403"; gene_name "Cuff.1403"; locus "RLOC_00006714";
chr13	Cufflinks_novel	exon	102062204	102062311	107	transcript_id "cuff_1403"; gene_id "Cuff.1403"; gene_name "Cuff.1403"; locus "RLOC_00006714";
chr13	Cufflinks_novel	exon	102063814	102063969	155	transcript_id "cuff_1403"; gene_id "Cuff.1403"; gene_name "Cuff.1403"; locus "RLOC_00006714";
chr13	Cufflinks_novel	exon	102076170	102076197	27	transcript_id "cuff_1404"; gene_id "Cuff.1404"; gene_name "Cuff.1404"; locus "RLOC_00006715";
chr13	Cufflinks_novel	exon	102075697	102075780	83	transcript_id "cuff_1404"; gene_id "Cuff.1404"; gene_name "Cuff.1404"; locus "RLOC_00006715";
chr13	Cufflinks_novel	exon	102075296	102075414	118	transcript_id "cuff_1404"; gene_id "Cuff.1404"; gene_name "Cuff.1404"; locus "RLOC_00006715";
chr13	Cufflinks_novel	exon	102143936	102143963	27	transcript_id "cuff_1405"; gene_id "Cuff.1405"; gene_name "Cuff.1405"; locus "RLOC_00006716";
chr13	Cufflinks_novel	exon	102144161	102144188	27	transcript_id "cuff_1405"; gene_id "Cuff.1405"; gene_name "Cuff.1405"; locus "RLOC_00006716";
chr13	Cufflinks_novel	exon	102167652	102167688	36	transcript_id "cuff_1406"; gene_id "Cuff.1406"; gene_name "Cuff.1406"; locus "RLOC_00006717";
chr13	Cufflinks_novel	exon	102167774	102167888	114	transcript_id "cuff_1406"; gene_id "Cuff.1406"; gene_name "Cuff.1406"; locus "RLOC_00006717";
chr13	Cufflinks_novel	exon	102168660	102168963	303	transcript_id "cuff_1406"; gene_id "Cuff.1406"; gene_name "Cuff.1406"; locus "RLOC_00006717";
chr13	Cufflinks_novel	exon	102186998	102187025	27	transcript_id "cuff_1407"; gene_id "Cuff.1407"; gene_name "Cuff.1407"; locus "RLOC_00006718";
chr13	Cufflinks_novel	exon	102187163	102187344	181	transcript_id "cuff_1407"; gene_id "Cuff.1407"; gene_name "Cuff.1407"; locus "RLOC_00006718";
chr13	Cufflinks_novel	exon	102193268	102193295	27	transcript_id "cuff_1408"; gene_id "Cuff.1408"; gene_name "Cuff.1408"; locus "RLOC_00006719";
chr13	Cufflinks_novel	exon	102191084	102191120	36	transcript_id "cuff_1408"; gene_id "Cuff.1408"; gene_name "Cuff.1408"; locus "RLOC_00006719";
chr13	Cufflinks_novel	exon	102191623	102191662	39	transcript_id "cuff_1408"; gene_id "Cuff.1408"; gene_name "Cuff.1408"; locus "RLOC_00006719";
chr13	Cufflinks_novel	exon	102190772	102190901	129	transcript_id "cuff_1408"; gene_id "Cuff.1408"; gene_name "Cuff.1408"; locus "RLOC_00006719";
chr13	Cufflinks_novel	exon	102189721	102189871	150	transcript_id "cuff_1408"; gene_id "Cuff.1408"; gene_name "Cuff.1408"; locus "RLOC_00006719";
chr13	Cufflinks_novel	exon	102202670	102202697	27	transcript_id "cuff_1409"; gene_id "Cuff.1409"; gene_name "Cuff.1409"; locus "RLOC_00006720";
chr13	Cufflinks_novel	exon	102201313	102201347	34	transcript_id "cuff_1409"; gene_id "Cuff.1409"; gene_name "Cuff.1409"; locus "RLOC_00006720";
chr1	Cufflinks_novel	exon	63802109	63802343	234	transcript_id "cuff_141"; gene_id "Cuff.141"; gene_name "Cuff.141"; locus "RLOC_00000442";
chr1	Cufflinks_novel	exon	63802636	63802925	289	transcript_id "cuff_141"; gene_id "Cuff.141"; gene_name "Cuff.141"; locus "RLOC_00000442";
chr13	Cufflinks_novel	exon	102210331	102210369	38	transcript_id "cuff_1410"; gene_id "Cuff.1410"; gene_name "Cuff.1410"; locus "RLOC_00006721";
chr13	Cufflinks_novel	exon	102212354	102212431	77	transcript_id "cuff_1410"; gene_id "Cuff.1410"; gene_name "Cuff.1410"; locus "RLOC_00006721";
chr13	Cufflinks_novel	exon	102213722	102213836	114	transcript_id "cuff_1410"; gene_id "Cuff.1410"; gene_name "Cuff.1410"; locus "RLOC_00006721";
chr13	Cufflinks_novel	exon	102211525	102211852	327	transcript_id "cuff_1410"; gene_id "Cuff.1410"; gene_name "Cuff.1410"; locus "RLOC_00006721";
chr13	Cufflinks_novel	exon	102234013	102234040	27	transcript_id "cuff_1411"; gene_id "Cuff.1411"; gene_name "Cuff.1411"; locus "RLOC_00006722";
chr13	Cufflinks_novel	exon	102235181	102235208	27	transcript_id "cuff_1411"; gene_id "Cuff.1411"; gene_name "Cuff.1411"; locus "RLOC_00006722";
chr13	Cufflinks_novel	exon	102233122	102233152	30	transcript_id "cuff_1411"; gene_id "Cuff.1411"; gene_name "Cuff.1411"; locus "RLOC_00006722";
chr13	Cufflinks_novel	exon	102228980	102229037	57	transcript_id "cuff_1411"; gene_id "Cuff.1411"; gene_name "Cuff.1411"; locus "RLOC_00006722";
chr13	Cufflinks_novel	exon	102237009	102237087	78	transcript_id "cuff_1411"; gene_id "Cuff.1411"; gene_name "Cuff.1411"; locus "RLOC_00006722";
chr13	Cufflinks_novel	exon	102230393	102230497	104	transcript_id "cuff_1411"; gene_id "Cuff.1411"; gene_name "Cuff.1411"; locus "RLOC_00006722";
chr13	Cufflinks_novel	exon	102227122	102227235	113	transcript_id "cuff_1411"; gene_id "Cuff.1411"; gene_name "Cuff.1411"; locus "RLOC_00006722";
chr13	Cufflinks_novel	exon	102227659	102227787	128	transcript_id "cuff_1411"; gene_id "Cuff.1411"; gene_name "Cuff.1411"; locus "RLOC_00006722";
chr13	Cufflinks_novel	exon	102232894	102233049	155	transcript_id "cuff_1411"; gene_id "Cuff.1411"; gene_name "Cuff.1411"; locus "RLOC_00006722";
chr13	Cufflinks_novel	exon	102233688	102233851	163	transcript_id "cuff_1411"; gene_id "Cuff.1411"; gene_name "Cuff.1411"; locus "RLOC_00006722";
chr13	Cufflinks_novel	exon	102233275	102233529	254	transcript_id "cuff_1411"; gene_id "Cuff.1411"; gene_name "Cuff.1411"; locus "RLOC_00006722";
chr13	Cufflinks_novel	exon	102231180	102231481	301	transcript_id "cuff_1411"; gene_id "Cuff.1411"; gene_name "Cuff.1411"; locus "RLOC_00006722";
chr13	Cufflinks_novel	exon	102231844	102232729	885	transcript_id "cuff_1411"; gene_id "Cuff.1411"; gene_name "Cuff.1411"; locus "RLOC_00006722";
chr13	Cufflinks_novel	exon	103455608	103455704	96	transcript_id "cuff_1412"; gene_id "Cuff.1412"; gene_name "Cuff.1412"; locus "RLOC_00006724";
chr13	Cufflinks_novel	exon	103455781	103456054	273	transcript_id "cuff_1412"; gene_id "Cuff.1412"; gene_name "Cuff.1412"; locus "RLOC_00006724";
chr13	Cufflinks_novel	exon	104124825	104124978	153	transcript_id "cuff_1413"; gene_id "Cuff.1413"; gene_name "Cuff.1413"; locus "RLOC_00006727";
chr13	Cufflinks_novel	exon	104125546	104125959	413	transcript_id "cuff_1413"; gene_id "Cuff.1413"; gene_name "Cuff.1413"; locus "RLOC_00006727";
chr13	Cufflinks_novel	exon	104237263	104237290	27	transcript_id "cuff_1414"; gene_id "Cuff.1414"; gene_name "Cuff.1414"; locus "RLOC_00006728";
chr13	Cufflinks_novel	exon	104236239	104236459	220	transcript_id "cuff_1414"; gene_id "Cuff.1414"; gene_name "Cuff.1414"; locus "RLOC_00006728";
chr13	Cufflinks_novel	exon	104249649	104249676	27	transcript_id "cuff_1415"; gene_id "Cuff.1415"; gene_name "Cuff.1415"; locus "RLOC_00006729";
chr13	Cufflinks_novel	exon	104251004	104251032	28	transcript_id "cuff_1415"; gene_id "Cuff.1415"; gene_name "Cuff.1415"; locus "RLOC_00006729";
chr13	Cufflinks_novel	exon	104251904	104251963	59	transcript_id "cuff_1415"; gene_id "Cuff.1415"; gene_name "Cuff.1415"; locus "RLOC_00006729";
chr13	Cufflinks_novel	exon	104249440	104249533	93	transcript_id "cuff_1415"; gene_id "Cuff.1415"; gene_name "Cuff.1415"; locus "RLOC_00006729";
chr13	Cufflinks_novel	exon	104248421	104248575	154	transcript_id "cuff_1415"; gene_id "Cuff.1415"; gene_name "Cuff.1415"; locus "RLOC_00006729";
chr13	Cufflinks_novel	exon	104250574	104250896	322	transcript_id "cuff_1415"; gene_id "Cuff.1415"; gene_name "Cuff.1415"; locus "RLOC_00006729";
chr13	Cufflinks_novel	exon	104556429	104556457	28	transcript_id "cuff_1416"; gene_id "Cuff.1416"; gene_name "Cuff.1416"; locus "RLOC_00006731";
chr13	Cufflinks_novel	exon	104555470	104555513	43	transcript_id "cuff_1416"; gene_id "Cuff.1416"; gene_name "Cuff.1416"; locus "RLOC_00006731";
chr13	Cufflinks_novel	exon	104555875	104555926	51	transcript_id "cuff_1416"; gene_id "Cuff.1416"; gene_name "Cuff.1416"; locus "RLOC_00006731";
chr13	Cufflinks_novel	exon	104560553	104560630	77	transcript_id "cuff_1416"; gene_id "Cuff.1416"; gene_name "Cuff.1416"; locus "RLOC_00006731";
chr13	Cufflinks_novel	exon	104557619	104557708	89	transcript_id "cuff_1416"; gene_id "Cuff.1416"; gene_name "Cuff.1416"; locus "RLOC_00006731";
chr13	Cufflinks_novel	exon	104557351	104557518	167	transcript_id "cuff_1416"; gene_id "Cuff.1416"; gene_name "Cuff.1416"; locus "RLOC_00006731";
chr13	Cufflinks_novel	exon	104556129	104556310	181	transcript_id "cuff_1416"; gene_id "Cuff.1416"; gene_name "Cuff.1416"; locus "RLOC_00006731";
chr13	Cufflinks_novel	exon	104556625	104556831	206	transcript_id "cuff_1416"; gene_id "Cuff.1416"; gene_name "Cuff.1416"; locus "RLOC_00006731";
chr13	Cufflinks_novel	exon	104556984	104557211	227	transcript_id "cuff_1416"; gene_id "Cuff.1416"; gene_name "Cuff.1416"; locus "RLOC_00006731";
chr13	Cufflinks_novel	exon	104559188	104559530	342	transcript_id "cuff_1416"; gene_id "Cuff.1416"; gene_name "Cuff.1416"; locus "RLOC_00006731";
chr13	Cufflinks_novel	exon	104557927	104558301	374	transcript_id "cuff_1416"; gene_id "Cuff.1416"; gene_name "Cuff.1416"; locus "RLOC_00006731";
chr13	Cufflinks_novel	exon	104564785	104564834	49	transcript_id "cuff_1417"; gene_id "Cuff.1417"; gene_name "Cuff.1417"; locus "RLOC_00006732";
chr13	Cufflinks_novel	exon	104563723	104563780	57	transcript_id "cuff_1417"; gene_id "Cuff.1417"; gene_name "Cuff.1417"; locus "RLOC_00006732";
chr13	Cufflinks_novel	exon	104564335	104564476	141	transcript_id "cuff_1417"; gene_id "Cuff.1417"; gene_name "Cuff.1417"; locus "RLOC_00006732";
chr13	Cufflinks_novel	exon	104591742	104591769	27	transcript_id "cuff_1418"; gene_id "Cuff.1418"; gene_name "Cuff.1418"; locus "RLOC_00006733";
chr13	Cufflinks_novel	exon	104590544	104590593	49	transcript_id "cuff_1418"; gene_id "Cuff.1418"; gene_name "Cuff.1418"; locus "RLOC_00006733";
chr13	Cufflinks_novel	exon	104593338	104593486	148	transcript_id "cuff_1418"; gene_id "Cuff.1418"; gene_name "Cuff.1418"; locus "RLOC_00006733";
chr13	Cufflinks_novel	exon	104597992	104598130	138	transcript_id "cuff_1419"; gene_id "Cuff.1419"; gene_name "Cuff.1419"; locus "RLOC_00006734";
chr13	Cufflinks_novel	exon	104596822	104597011	189	transcript_id "cuff_1419"; gene_id "Cuff.1419"; gene_name "Cuff.1419"; locus "RLOC_00006734";
chr1	Cufflinks_novel	exon	64726488	64726583	95	transcript_id "cuff_142"; gene_id "Cuff.142"; gene_name "Cuff.142"; locus "RLOC_00000447";
chr1	Cufflinks_novel	exon	64726644	64726948	304	transcript_id "cuff_142"; gene_id "Cuff.142"; gene_name "Cuff.142"; locus "RLOC_00000447";
chr13	Cufflinks_novel	exon	108482296	108482323	27	transcript_id "cuff_1420"; gene_id "Cuff.1420"; gene_name "Cuff.1420"; locus "RLOC_00006754";
chr13	Cufflinks_novel	exon	108482383	108482410	27	transcript_id "cuff_1420"; gene_id "Cuff.1420"; gene_name "Cuff.1420"; locus "RLOC_00006754";
chr13	Cufflinks_novel	exon	108482034	108482062	28	transcript_id "cuff_1420"; gene_id "Cuff.1420"; gene_name "Cuff.1420"; locus "RLOC_00006754";
chr13	Cufflinks_novel	exon	109183505	109183577	72	transcript_id "cuff_1421"; gene_id "Cuff.1421"; gene_name "Cuff.1421"; locus "RLOC_00006761";
chr13	Cufflinks_novel	exon	109184405	109184527	122	transcript_id "cuff_1421"; gene_id "Cuff.1421"; gene_name "Cuff.1421"; locus "RLOC_00006761";
chr13	Cufflinks_novel	exon	109182972	109183096	124	transcript_id "cuff_1421"; gene_id "Cuff.1421"; gene_name "Cuff.1421"; locus "RLOC_00006761";
chr13	Cufflinks_novel	exon	109184023	109184164	141	transcript_id "cuff_1421"; gene_id "Cuff.1421"; gene_name "Cuff.1421"; locus "RLOC_00006761";
chr13	Cufflinks_novel	exon	109213255	109213519	264	transcript_id "cuff_1422"; gene_id "Cuff.1422"; gene_name "Cuff.1422"; locus "RLOC_00006762";
chr13	Cufflinks_novel	exon	109211789	109212099	310	transcript_id "cuff_1422"; gene_id "Cuff.1422"; gene_name "Cuff.1422"; locus "RLOC_00006762";
chr13	Cufflinks_novel	exon	109254285	109254385	100	transcript_id "cuff_1423"; gene_id "Cuff.1423"; gene_name "Cuff.1423"; locus "RLOC_00006763";
chr13	Cufflinks_novel	exon	109254880	109255086	206	transcript_id "cuff_1423"; gene_id "Cuff.1423"; gene_name "Cuff.1423"; locus "RLOC_00006763";
chr13	Cufflinks_novel	exon	111358991	111359018	27	transcript_id "cuff_1424"; gene_id "Cuff.1424"; gene_name "Cuff.1424"; locus "RLOC_00006770";
chr13	Cufflinks_novel	exon	111359272	111359325	53	transcript_id "cuff_1424"; gene_id "Cuff.1424"; gene_name "Cuff.1424"; locus "RLOC_00006770";
chr13	Cufflinks_novel	exon	112006790	112006817	27	transcript_id "cuff_1425"; gene_id "Cuff.1425"; gene_name "Cuff.1425"; locus "RLOC_00006771";
chr13	Cufflinks_novel	exon	112005648	112005816	168	transcript_id "cuff_1425"; gene_id "Cuff.1425"; gene_name "Cuff.1425"; locus "RLOC_00006771";
chr13	Cufflinks_novel	exon	112006188	112006385	197	transcript_id "cuff_1425"; gene_id "Cuff.1425"; gene_name "Cuff.1425"; locus "RLOC_00006771";
chr13	Cufflinks_novel	exon	113373777	113373804	27	transcript_id "cuff_1426"; gene_id "Cuff.1426"; gene_name "Cuff.1426"; locus "RLOC_00006779";
chr13	Cufflinks_novel	exon	113375077	113375104	27	transcript_id "cuff_1426"; gene_id "Cuff.1426"; gene_name "Cuff.1426"; locus "RLOC_00006779";
chr13	Cufflinks_novel	exon	113380901	113380929	28	transcript_id "cuff_1427"; gene_id "Cuff.1427"; gene_name "Cuff.1427"; locus "RLOC_00006780";
chr13	Cufflinks_novel	exon	113381206	113381382	176	transcript_id "cuff_1427"; gene_id "Cuff.1427"; gene_name "Cuff.1427"; locus "RLOC_00006780";
chr13	Cufflinks_novel	exon	113926397	113926456	59	transcript_id "cuff_1428"; gene_id "Cuff.1428"; gene_name "Cuff.1428"; locus "RLOC_00006793";
chr13	Cufflinks_novel	exon	113926876	113926965	89	transcript_id "cuff_1428"; gene_id "Cuff.1428"; gene_name "Cuff.1428"; locus "RLOC_00006793";
chr13	Cufflinks_novel	exon	113945621	113945736	115	transcript_id "cuff_1429"; gene_id "Cuff.1429"; gene_name "Cuff.1429"; locus "RLOC_00006794";
chr13	Cufflinks_novel	exon	113945324	113945505	181	transcript_id "cuff_1429"; gene_id "Cuff.1429"; gene_name "Cuff.1429"; locus "RLOC_00006794";
chr1	Cufflinks_novel	exon	66078675	66078702	27	transcript_id "cuff_143"; gene_id "Cuff.143"; gene_name "Cuff.143"; locus "RLOC_00000462";
chr1	Cufflinks_novel	exon	66078967	66078995	28	transcript_id "cuff_143"; gene_id "Cuff.143"; gene_name "Cuff.143"; locus "RLOC_00000462";
chr13	Cufflinks_novel	exon	114475198	114475225	27	transcript_id "cuff_1430"; gene_id "Cuff.1430"; gene_name "Cuff.1430"; locus "RLOC_00006799";
chr13	Cufflinks_novel	exon	114474698	114474751	53	transcript_id "cuff_1430"; gene_id "Cuff.1430"; gene_name "Cuff.1430"; locus "RLOC_00006799";
chr13	Cufflinks_novel	exon	115404528	115404555	27	transcript_id "cuff_1431"; gene_id "Cuff.1431"; gene_name "Cuff.1431"; locus "RLOC_00006803";
chr13	Cufflinks_novel	exon	115406381	115406408	27	transcript_id "cuff_1431"; gene_id "Cuff.1431"; gene_name "Cuff.1431"; locus "RLOC_00006803";
chr13	Cufflinks_novel	exon	115407732	115407797	65	transcript_id "cuff_1431"; gene_id "Cuff.1431"; gene_name "Cuff.1431"; locus "RLOC_00006803";
chr13	Cufflinks_novel	exon	115405358	115405569	211	transcript_id "cuff_1431"; gene_id "Cuff.1431"; gene_name "Cuff.1431"; locus "RLOC_00006803";
chr13	Cufflinks_novel	exon	115420460	115420487	27	transcript_id "cuff_1432"; gene_id "Cuff.1432"; gene_name "Cuff.1432"; locus "RLOC_00006804";
chr13	Cufflinks_novel	exon	115420607	115420665	58	transcript_id "cuff_1432"; gene_id "Cuff.1432"; gene_name "Cuff.1432"; locus "RLOC_00006804";
chr13	Cufflinks_novel	exon	115424235	115424262	27	transcript_id "cuff_1433"; gene_id "Cuff.1433"; gene_name "Cuff.1433"; locus "RLOC_00006805";
chr13	Cufflinks_novel	exon	115426833	115426883	50	transcript_id "cuff_1433"; gene_id "Cuff.1433"; gene_name "Cuff.1433"; locus "RLOC_00006805";
chr13	Cufflinks_novel	exon	115426072	115426289	217	transcript_id "cuff_1433"; gene_id "Cuff.1433"; gene_name "Cuff.1433"; locus "RLOC_00006805";
chr13	Cufflinks_novel	exon	115467332	115467394	62	transcript_id "cuff_1434"; gene_id "Cuff.1434"; gene_name "Cuff.1434"; locus "RLOC_00006806";
chr13	Cufflinks_novel	exon	115468090	115468178	88	transcript_id "cuff_1434"; gene_id "Cuff.1434"; gene_name "Cuff.1434"; locus "RLOC_00006806";
chr13	Cufflinks_novel	exon	119332802	119332829	27	transcript_id "cuff_1435"; gene_id "Cuff.1435"; gene_name "Cuff.1435"; locus "RLOC_00006816";
chr13	Cufflinks_novel	exon	119334378	119334407	29	transcript_id "cuff_1435"; gene_id "Cuff.1435"; gene_name "Cuff.1435"; locus "RLOC_00006816";
chr13	Cufflinks_novel	exon	119354226	119354253	27	transcript_id "cuff_1436"; gene_id "Cuff.1436"; gene_name "Cuff.1436"; locus "RLOC_00006817";
chr13	Cufflinks_novel	exon	119353795	119353962	167	transcript_id "cuff_1436"; gene_id "Cuff.1436"; gene_name "Cuff.1436"; locus "RLOC_00006817";
chr14	Cufflinks_novel	exon	3651327	3651370	43	transcript_id "cuff_1437"; gene_id "Cuff.1437"; gene_name "Cuff.1437"; locus "RLOC_00006835";
chr14	Cufflinks_novel	exon	3651557	3651770	213	transcript_id "cuff_1437"; gene_id "Cuff.1437"; gene_name "Cuff.1437"; locus "RLOC_00006835";
chr14	Cufflinks_novel	exon	8537312	8537340	28	transcript_id "cuff_1438"; gene_id "Cuff.1438"; gene_name "Cuff.1438"; locus "RLOC_00006847";
chr14	Cufflinks_novel	exon	8536917	8537145	228	transcript_id "cuff_1438"; gene_id "Cuff.1438"; gene_name "Cuff.1438"; locus "RLOC_00006847";
chr14	Cufflinks_novel	exon	8536202	8536468	266	transcript_id "cuff_1438"; gene_id "Cuff.1438"; gene_name "Cuff.1438"; locus "RLOC_00006847";
chr14	Cufflinks_novel	exon	8536531	8536797	266	transcript_id "cuff_1438"; gene_id "Cuff.1438"; gene_name "Cuff.1438"; locus "RLOC_00006847";
chr14	Cufflinks_novel	exon	8569623	8569804	181	transcript_id "cuff_1439"; gene_id "Cuff.1439"; gene_name "Cuff.1439"; locus "RLOC_00006848";
chr14	Cufflinks_novel	exon	8570464	8570667	203	transcript_id "cuff_1439"; gene_id "Cuff.1439"; gene_name "Cuff.1439"; locus "RLOC_00006848";
chr14	Cufflinks_novel	exon	8570951	8571168	217	transcript_id "cuff_1439"; gene_id "Cuff.1439"; gene_name "Cuff.1439"; locus "RLOC_00006848";
chr14	Cufflinks_novel	exon	8571971	8572191	220	transcript_id "cuff_1439"; gene_id "Cuff.1439"; gene_name "Cuff.1439"; locus "RLOC_00006848";
chr1	Cufflinks_novel	exon	67862735	67862774	39	transcript_id "cuff_144"; gene_id "Cuff.144"; gene_name "Cuff.144"; locus "RLOC_00000471";
chr1	Cufflinks_novel	exon	67861802	67861985	183	transcript_id "cuff_144"; gene_id "Cuff.144"; gene_name "Cuff.144"; locus "RLOC_00000471";
chr14	Cufflinks_novel	exon	8578902	8579010	108	transcript_id "cuff_1440"; gene_id "Cuff.1440"; gene_name "Cuff.1440"; locus "RLOC_00006849";
chr14	Cufflinks_novel	exon	8576393	8576588	195	transcript_id "cuff_1440"; gene_id "Cuff.1440"; gene_name "Cuff.1440"; locus "RLOC_00006849";
chr14	Cufflinks_novel	exon	8577277	8577492	215	transcript_id "cuff_1440"; gene_id "Cuff.1440"; gene_name "Cuff.1440"; locus "RLOC_00006849";
chr14	Cufflinks_novel	exon	8596598	8596628	30	transcript_id "cuff_1441"; gene_id "Cuff.1441"; gene_name "Cuff.1441"; locus "RLOC_00006850";
chr14	Cufflinks_novel	exon	8596883	8596916	33	transcript_id "cuff_1441"; gene_id "Cuff.1441"; gene_name "Cuff.1441"; locus "RLOC_00006850";
chr14	Cufflinks_novel	exon	8587600	8587692	92	transcript_id "cuff_1441"; gene_id "Cuff.1441"; gene_name "Cuff.1441"; locus "RLOC_00006850";
chr14	Cufflinks_novel	exon	8587958	8588056	98	transcript_id "cuff_1441"; gene_id "Cuff.1441"; gene_name "Cuff.1441"; locus "RLOC_00006850";
chr14	Cufflinks_novel	exon	8598208	8598336	128	transcript_id "cuff_1441"; gene_id "Cuff.1441"; gene_name "Cuff.1441"; locus "RLOC_00006850";
chr14	Cufflinks_novel	exon	8589099	8589259	160	transcript_id "cuff_1441"; gene_id "Cuff.1441"; gene_name "Cuff.1441"; locus "RLOC_00006850";
chr14	Cufflinks_novel	exon	8592017	8592200	183	transcript_id "cuff_1441"; gene_id "Cuff.1441"; gene_name "Cuff.1441"; locus "RLOC_00006850";
chr14	Cufflinks_novel	exon	8590057	8590267	210	transcript_id "cuff_1441"; gene_id "Cuff.1441"; gene_name "Cuff.1441"; locus "RLOC_00006850";
chr14	Cufflinks_novel	exon	8594588	8594808	220	transcript_id "cuff_1441"; gene_id "Cuff.1441"; gene_name "Cuff.1441"; locus "RLOC_00006850";
chr14	Cufflinks_novel	exon	8593587	8593833	246	transcript_id "cuff_1441"; gene_id "Cuff.1441"; gene_name "Cuff.1441"; locus "RLOC_00006850";
chr14	Cufflinks_novel	exon	8597165	8597425	260	transcript_id "cuff_1441"; gene_id "Cuff.1441"; gene_name "Cuff.1441"; locus "RLOC_00006850";
chr14	Cufflinks_novel	exon	8588630	8588955	325	transcript_id "cuff_1441"; gene_id "Cuff.1441"; gene_name "Cuff.1441"; locus "RLOC_00006850";
chr14	Cufflinks_novel	exon	8589541	8589880	339	transcript_id "cuff_1441"; gene_id "Cuff.1441"; gene_name "Cuff.1441"; locus "RLOC_00006850";
chr14	Cufflinks_novel	exon	8603654	8603809	155	transcript_id "cuff_1442"; gene_id "Cuff.1442"; gene_name "Cuff.1442"; locus "RLOC_00006851";
chr14	Cufflinks_novel	exon	8603302	8603496	194	transcript_id "cuff_1442"; gene_id "Cuff.1442"; gene_name "Cuff.1442"; locus "RLOC_00006851";
chr14	Cufflinks_novel	exon	8610549	8610576	27	transcript_id "cuff_1443"; gene_id "Cuff.1443"; gene_name "Cuff.1443"; locus "RLOC_00006852";
chr14	Cufflinks_novel	exon	8606375	8606497	122	transcript_id "cuff_1443"; gene_id "Cuff.1443"; gene_name "Cuff.1443"; locus "RLOC_00006852";
chr14	Cufflinks_novel	exon	8611353	8611516	163	transcript_id "cuff_1443"; gene_id "Cuff.1443"; gene_name "Cuff.1443"; locus "RLOC_00006852";
chr14	Cufflinks_novel	exon	8607328	8607563	235	transcript_id "cuff_1443"; gene_id "Cuff.1443"; gene_name "Cuff.1443"; locus "RLOC_00006852";
chr14	Cufflinks_novel	exon	8610236	8610477	241	transcript_id "cuff_1443"; gene_id "Cuff.1443"; gene_name "Cuff.1443"; locus "RLOC_00006852";
chr14	Cufflinks_novel	exon	8608952	8609292	340	transcript_id "cuff_1443"; gene_id "Cuff.1443"; gene_name "Cuff.1443"; locus "RLOC_00006852";
chr14	Cufflinks_novel	exon	8616959	8617002	43	transcript_id "cuff_1444"; gene_id "Cuff.1444"; gene_name "Cuff.1444"; locus "RLOC_00006853";
chr14	Cufflinks_novel	exon	8622553	8622607	54	transcript_id "cuff_1444"; gene_id "Cuff.1444"; gene_name "Cuff.1444"; locus "RLOC_00006853";
chr14	Cufflinks_novel	exon	8620576	8620639	63	transcript_id "cuff_1444"; gene_id "Cuff.1444"; gene_name "Cuff.1444"; locus "RLOC_00006853";
chr14	Cufflinks_novel	exon	8615329	8615403	74	transcript_id "cuff_1444"; gene_id "Cuff.1444"; gene_name "Cuff.1444"; locus "RLOC_00006853";
chr14	Cufflinks_novel	exon	8615509	8615612	103	transcript_id "cuff_1444"; gene_id "Cuff.1444"; gene_name "Cuff.1444"; locus "RLOC_00006853";
chr14	Cufflinks_novel	exon	8624824	8624982	158	transcript_id "cuff_1444"; gene_id "Cuff.1444"; gene_name "Cuff.1444"; locus "RLOC_00006853";
chr14	Cufflinks_novel	exon	8614485	8614656	171	transcript_id "cuff_1444"; gene_id "Cuff.1444"; gene_name "Cuff.1444"; locus "RLOC_00006853";
chr14	Cufflinks_novel	exon	8618557	8618789	232	transcript_id "cuff_1444"; gene_id "Cuff.1444"; gene_name "Cuff.1444"; locus "RLOC_00006853";
chr14	Cufflinks_novel	exon	8624386	8624675	289	transcript_id "cuff_1444"; gene_id "Cuff.1444"; gene_name "Cuff.1444"; locus "RLOC_00006853";
chr14	Cufflinks_novel	exon	8633881	8633908	27	transcript_id "cuff_1445"; gene_id "Cuff.1445"; gene_name "Cuff.1445"; locus "RLOC_00006854";
chr14	Cufflinks_novel	exon	8634140	8634167	27	transcript_id "cuff_1445"; gene_id "Cuff.1445"; gene_name "Cuff.1445"; locus "RLOC_00006854";
chr14	Cufflinks_novel	exon	8634325	8634379	54	transcript_id "cuff_1445"; gene_id "Cuff.1445"; gene_name "Cuff.1445"; locus "RLOC_00006854";
chr14	Cufflinks_novel	exon	8789837	8789907	70	transcript_id "cuff_1446"; gene_id "Cuff.1446"; gene_name "Cuff.1446"; locus "RLOC_00006856";
chr14	Cufflinks_novel	exon	8790269	8790371	102	transcript_id "cuff_1446"; gene_id "Cuff.1446"; gene_name "Cuff.1446"; locus "RLOC_00006856";
chr14	Cufflinks_novel	exon	8790047	8790182	135	transcript_id "cuff_1446"; gene_id "Cuff.1446"; gene_name "Cuff.1446"; locus "RLOC_00006856";
chr14	Cufflinks_novel	exon	8794720	8794798	78	transcript_id "cuff_1447"; gene_id "Cuff.1447"; gene_name "Cuff.1447"; locus "RLOC_00006857";
chr14	Cufflinks_novel	exon	8795004	8795254	250	transcript_id "cuff_1447"; gene_id "Cuff.1447"; gene_name "Cuff.1447"; locus "RLOC_00006857";
chr14	Cufflinks_novel	exon	8793036	8793579	543	transcript_id "cuff_1447"; gene_id "Cuff.1447"; gene_name "Cuff.1447"; locus "RLOC_00006857";
chr14	Cufflinks_novel	exon	8833855	8833962	107	transcript_id "cuff_1448"; gene_id "Cuff.1448"; gene_name "Cuff.1448"; locus "RLOC_00006859";
chr14	Cufflinks_novel	exon	8832825	8832941	116	transcript_id "cuff_1448"; gene_id "Cuff.1448"; gene_name "Cuff.1448"; locus "RLOC_00006859";
chr14	Cufflinks_novel	exon	8832238	8832391	153	transcript_id "cuff_1448"; gene_id "Cuff.1448"; gene_name "Cuff.1448"; locus "RLOC_00006859";
chr14	Cufflinks_novel	exon	8834895	8835072	177	transcript_id "cuff_1448"; gene_id "Cuff.1448"; gene_name "Cuff.1448"; locus "RLOC_00006859";
chr14	Cufflinks_novel	exon	8833301	8833533	232	transcript_id "cuff_1448"; gene_id "Cuff.1448"; gene_name "Cuff.1448"; locus "RLOC_00006859";
chr14	Cufflinks_novel	exon	8834414	8834654	240	transcript_id "cuff_1448"; gene_id "Cuff.1448"; gene_name "Cuff.1448"; locus "RLOC_00006859";
chr14	Cufflinks_novel	exon	9501817	9501894	77	transcript_id "cuff_1449"; gene_id "Cuff.1449"; gene_name "Cuff.1449"; locus "RLOC_00006869";
chr14	Cufflinks_novel	exon	9500154	9500245	91	transcript_id "cuff_1449"; gene_id "Cuff.1449"; gene_name "Cuff.1449"; locus "RLOC_00006869";
chr14	Cufflinks_novel	exon	9503270	9503426	156	transcript_id "cuff_1449"; gene_id "Cuff.1449"; gene_name "Cuff.1449"; locus "RLOC_00006869";
chr1	Cufflinks_novel	exon	67865507	67865678	171	transcript_id "cuff_145"; gene_id "Cuff.145"; gene_name "Cuff.145"; locus "RLOC_00000472";
chr1	Cufflinks_novel	exon	67865014	67865249	235	transcript_id "cuff_145"; gene_id "Cuff.145"; gene_name "Cuff.145"; locus "RLOC_00000472";
chr14	Cufflinks_novel	exon	15975216	15975364	148	transcript_id "cuff_1450"; gene_id "Cuff.1450"; gene_name "Cuff.1450"; locus "RLOC_00006887";
chr14	Cufflinks_novel	exon	15976362	15976587	225	transcript_id "cuff_1450"; gene_id "Cuff.1450"; gene_name "Cuff.1450"; locus "RLOC_00006887";
chr14	Cufflinks_novel	exon	15976668	15976909	241	transcript_id "cuff_1450"; gene_id "Cuff.1450"; gene_name "Cuff.1450"; locus "RLOC_00006887";
chr14	Cufflinks_novel	exon	15985492	15985519	27	transcript_id "cuff_1451"; gene_id "Cuff.1451"; gene_name "Cuff.1451"; locus "RLOC_00006888";
chr14	Cufflinks_novel	exon	15984768	15984866	98	transcript_id "cuff_1451"; gene_id "Cuff.1451"; gene_name "Cuff.1451"; locus "RLOC_00006888";
chr14	Cufflinks_novel	exon	15983994	15984143	149	transcript_id "cuff_1451"; gene_id "Cuff.1451"; gene_name "Cuff.1451"; locus "RLOC_00006888";
chr14	Cufflinks_novel	exon	15992921	15992948	27	transcript_id "cuff_1452"; gene_id "Cuff.1452"; gene_name "Cuff.1452"; locus "RLOC_00006889";
chr14	Cufflinks_novel	exon	15990998	15991181	183	transcript_id "cuff_1452"; gene_id "Cuff.1452"; gene_name "Cuff.1452"; locus "RLOC_00006889";
chr14	Cufflinks_novel	exon	15991271	15991550	279	transcript_id "cuff_1452"; gene_id "Cuff.1452"; gene_name "Cuff.1452"; locus "RLOC_00006889";
chr14	Cufflinks_novel	exon	16140014	16140041	27	transcript_id "cuff_1453"; gene_id "Cuff.1453"; gene_name "Cuff.1453"; locus "RLOC_00006890";
chr14	Cufflinks_novel	exon	16140400	16140427	27	transcript_id "cuff_1453"; gene_id "Cuff.1453"; gene_name "Cuff.1453"; locus "RLOC_00006890";
chr14	Cufflinks_novel	exon	16140900	16140927	27	transcript_id "cuff_1453"; gene_id "Cuff.1453"; gene_name "Cuff.1453"; locus "RLOC_00006890";
chr14	Cufflinks_novel	exon	16140727	16140778	51	transcript_id "cuff_1453"; gene_id "Cuff.1453"; gene_name "Cuff.1453"; locus "RLOC_00006890";
chr14	Cufflinks_novel	exon	17908522	17908549	27	transcript_id "cuff_1454"; gene_id "Cuff.1454"; gene_name "Cuff.1454"; locus "RLOC_00006896";
chr14	Cufflinks_novel	exon	17908824	17909135	311	transcript_id "cuff_1454"; gene_id "Cuff.1454"; gene_name "Cuff.1454"; locus "RLOC_00006896";
chr14	Cufflinks_novel	exon	17947252	17947309	57	transcript_id "cuff_1455"; gene_id "Cuff.1455"; gene_name "Cuff.1455"; locus "RLOC_00006897";
chr14	Cufflinks_novel	exon	17948007	17948098	91	transcript_id "cuff_1455"; gene_id "Cuff.1455"; gene_name "Cuff.1455"; locus "RLOC_00006897";
chr14	Cufflinks_novel	exon	17994536	17994705	169	transcript_id "cuff_1456"; gene_id "Cuff.1456"; gene_name "Cuff.1456"; locus "RLOC_00006898";
chr14	Cufflinks_novel	exon	17992768	17992955	187	transcript_id "cuff_1456"; gene_id "Cuff.1456"; gene_name "Cuff.1456"; locus "RLOC_00006898";
chr14	Cufflinks_novel	exon	18005884	18005959	75	transcript_id "cuff_1457"; gene_id "Cuff.1457"; gene_name "Cuff.1457"; locus "RLOC_00006899";
chr14	Cufflinks_novel	exon	18004658	18004794	136	transcript_id "cuff_1457"; gene_id "Cuff.1457"; gene_name "Cuff.1457"; locus "RLOC_00006899";
chr14	Cufflinks_novel	exon	19363939	19364595	656	transcript_id "cuff_1458"; gene_id "Cuff.1458"; gene_name "Cuff.1458"; locus "RLOC_00006905";
chr14	Cufflinks_novel	exon	19964773	19964800	27	transcript_id "cuff_1459"; gene_id "Cuff.1459"; gene_name "Cuff.1459"; locus "RLOC_00006907";
chr14	Cufflinks_novel	exon	19962135	19962245	110	transcript_id "cuff_1459"; gene_id "Cuff.1459"; gene_name "Cuff.1459"; locus "RLOC_00006907";
chr14	Cufflinks_novel	exon	19960286	19960454	168	transcript_id "cuff_1459"; gene_id "Cuff.1459"; gene_name "Cuff.1459"; locus "RLOC_00006907";
chr14	Cufflinks_novel	exon	19963449	19963751	302	transcript_id "cuff_1459"; gene_id "Cuff.1459"; gene_name "Cuff.1459"; locus "RLOC_00006907";
chr1	Cufflinks_novel	exon	72266691	72266718	27	transcript_id "cuff_146"; gene_id "Cuff.146"; gene_name "Cuff.146"; locus "RLOC_00000483";
chr1	Cufflinks_novel	exon	72269942	72269969	27	transcript_id "cuff_146"; gene_id "Cuff.146"; gene_name "Cuff.146"; locus "RLOC_00000483";
chr1	Cufflinks_novel	exon	72268396	72268426	30	transcript_id "cuff_146"; gene_id "Cuff.146"; gene_name "Cuff.146"; locus "RLOC_00000483";
chr1	Cufflinks_novel	exon	72270296	72270383	87	transcript_id "cuff_146"; gene_id "Cuff.146"; gene_name "Cuff.146"; locus "RLOC_00000483";
chr1	Cufflinks_novel	exon	72269694	72269833	139	transcript_id "cuff_146"; gene_id "Cuff.146"; gene_name "Cuff.146"; locus "RLOC_00000483";
chr1	Cufflinks_novel	exon	72270461	72270702	241	transcript_id "cuff_146"; gene_id "Cuff.146"; gene_name "Cuff.146"; locus "RLOC_00000483";
chr1	Cufflinks_novel	exon	72268708	72268983	275	transcript_id "cuff_146"; gene_id "Cuff.146"; gene_name "Cuff.146"; locus "RLOC_00000483";
chr14	Cufflinks_novel	exon	20234089	20234223	134	transcript_id "cuff_1460"; gene_id "Cuff.1460"; gene_name "Cuff.1460"; locus "RLOC_00006908";
chr14	Cufflinks_novel	exon	20234717	20234939	222	transcript_id "cuff_1460"; gene_id "Cuff.1460"; gene_name "Cuff.1460"; locus "RLOC_00006908";
chr14	Cufflinks_novel	exon	20446419	20446454	35	transcript_id "cuff_1461"; gene_id "Cuff.1461"; gene_name "Cuff.1461"; locus "RLOC_00006910";
chr14	Cufflinks_novel	exon	20447300	20447354	54	transcript_id "cuff_1461"; gene_id "Cuff.1461"; gene_name "Cuff.1461"; locus "RLOC_00006910";
chr14	Cufflinks_novel	exon	20444599	20444716	117	transcript_id "cuff_1461"; gene_id "Cuff.1461"; gene_name "Cuff.1461"; locus "RLOC_00006910";
chr14	Cufflinks_novel	exon	20445055	20445196	141	transcript_id "cuff_1461"; gene_id "Cuff.1461"; gene_name "Cuff.1461"; locus "RLOC_00006910";
chr14	Cufflinks_novel	exon	20443684	20443890	206	transcript_id "cuff_1461"; gene_id "Cuff.1461"; gene_name "Cuff.1461"; locus "RLOC_00006910";
chr14	Cufflinks_novel	exon	20446572	20447231	659	transcript_id "cuff_1461"; gene_id "Cuff.1461"; gene_name "Cuff.1461"; locus "RLOC_00006910";
chr14	Cufflinks_novel	exon	20445388	20446153	765	transcript_id "cuff_1461"; gene_id "Cuff.1461"; gene_name "Cuff.1461"; locus "RLOC_00006910";
chr14	Cufflinks_novel	exon	20472090	20472223	133	transcript_id "cuff_1462"; gene_id "Cuff.1462"; gene_name "Cuff.1462"; locus "RLOC_00006913";
chr14	Cufflinks_novel	exon	20472290	20472749	459	transcript_id "cuff_1462"; gene_id "Cuff.1462"; gene_name "Cuff.1462"; locus "RLOC_00006913";
chr14	Cufflinks_novel	exon	21460248	21460313	65	transcript_id "cuff_1463"; gene_id "Cuff.1463"; gene_name "Cuff.1463"; locus "RLOC_00006931";
chr14	Cufflinks_novel	exon	21459678	21459916	238	transcript_id "cuff_1463"; gene_id "Cuff.1463"; gene_name "Cuff.1463"; locus "RLOC_00006931";
chr14	Cufflinks_novel	exon	21458162	21458441	279	transcript_id "cuff_1463"; gene_id "Cuff.1463"; gene_name "Cuff.1463"; locus "RLOC_00006931";
chr14	Cufflinks_novel	exon	21460657	21461015	358	transcript_id "cuff_1463"; gene_id "Cuff.1463"; gene_name "Cuff.1463"; locus "RLOC_00006931";
chr14	Cufflinks_novel	exon	22279360	22279387	27	transcript_id "cuff_1464"; gene_id "Cuff.1464"; gene_name "Cuff.1464"; locus "RLOC_00006945";
chr14	Cufflinks_novel	exon	22280078	22280222	144	transcript_id "cuff_1464"; gene_id "Cuff.1464"; gene_name "Cuff.1464"; locus "RLOC_00006945";
chr14	Cufflinks_novel	exon	22688166	22688246	80	transcript_id "cuff_1465"; gene_id "Cuff.1465"; gene_name "Cuff.1465"; locus "RLOC_00006952";
chr14	Cufflinks_novel	exon	22688521	22688625	104	transcript_id "cuff_1465"; gene_id "Cuff.1465"; gene_name "Cuff.1465"; locus "RLOC_00006952";
chr14	Cufflinks_novel	exon	22688691	22688871	180	transcript_id "cuff_1465"; gene_id "Cuff.1465"; gene_name "Cuff.1465"; locus "RLOC_00006952";
chr14	Cufflinks_novel	exon	24873581	24873685	104	transcript_id "cuff_1466"; gene_id "Cuff.1466"; gene_name "Cuff.1466"; locus "RLOC_00006957";
chr14	Cufflinks_novel	exon	24872044	24872155	111	transcript_id "cuff_1466"; gene_id "Cuff.1466"; gene_name "Cuff.1466"; locus "RLOC_00006957";
chr14	Cufflinks_novel	exon	24872938	24873146	208	transcript_id "cuff_1466"; gene_id "Cuff.1466"; gene_name "Cuff.1466"; locus "RLOC_00006957";
chr14	Cufflinks_novel	exon	24874073	24874299	226	transcript_id "cuff_1466"; gene_id "Cuff.1466"; gene_name "Cuff.1466"; locus "RLOC_00006957";
chr14	Cufflinks_novel	exon	24871089	24871337	248	transcript_id "cuff_1466"; gene_id "Cuff.1466"; gene_name "Cuff.1466"; locus "RLOC_00006957";
chr14	Cufflinks_novel	exon	24870049	24870459	410	transcript_id "cuff_1466"; gene_id "Cuff.1466"; gene_name "Cuff.1466"; locus "RLOC_00006957";
chr14	Cufflinks_novel	exon	24876451	24876508	57	transcript_id "cuff_1467"; gene_id "Cuff.1467"; gene_name "Cuff.1467"; locus "RLOC_00006958";
chr14	Cufflinks_novel	exon	24878468	24878745	277	transcript_id "cuff_1467"; gene_id "Cuff.1467"; gene_name "Cuff.1467"; locus "RLOC_00006958";
chr14	Cufflinks_novel	exon	24876615	24876990	375	transcript_id "cuff_1467"; gene_id "Cuff.1467"; gene_name "Cuff.1467"; locus "RLOC_00006958";
chr14	Cufflinks_novel	exon	24890438	24890570	132	transcript_id "cuff_1468"; gene_id "Cuff.1468"; gene_name "Cuff.1468"; locus "RLOC_00006959";
chr14	Cufflinks_novel	exon	24886163	24886310	147	transcript_id "cuff_1468"; gene_id "Cuff.1468"; gene_name "Cuff.1468"; locus "RLOC_00006959";
chr14	Cufflinks_novel	exon	24887569	24887756	187	transcript_id "cuff_1468"; gene_id "Cuff.1468"; gene_name "Cuff.1468"; locus "RLOC_00006959";
chr14	Cufflinks_novel	exon	24891470	24891716	246	transcript_id "cuff_1468"; gene_id "Cuff.1468"; gene_name "Cuff.1468"; locus "RLOC_00006959";
chr14	Cufflinks_novel	exon	24892400	24892727	327	transcript_id "cuff_1468"; gene_id "Cuff.1468"; gene_name "Cuff.1468"; locus "RLOC_00006959";
chr14	Cufflinks_novel	exon	24886784	24887116	332	transcript_id "cuff_1468"; gene_id "Cuff.1468"; gene_name "Cuff.1468"; locus "RLOC_00006959";
chr14	Cufflinks_novel	exon	24891942	24892293	351	transcript_id "cuff_1468"; gene_id "Cuff.1468"; gene_name "Cuff.1468"; locus "RLOC_00006959";
chr14	Cufflinks_novel	exon	24885315	24885911	596	transcript_id "cuff_1468"; gene_id "Cuff.1468"; gene_name "Cuff.1468"; locus "RLOC_00006959";
chr14	Cufflinks_novel	exon	24887948	24888609	661	transcript_id "cuff_1468"; gene_id "Cuff.1468"; gene_name "Cuff.1468"; locus "RLOC_00006959";
chr14	Cufflinks_novel	exon	24900237	24900378	141	transcript_id "cuff_1469"; gene_id "Cuff.1469"; gene_name "Cuff.1469"; locus "RLOC_00006960";
chr14	Cufflinks_novel	exon	24898965	24899296	331	transcript_id "cuff_1469"; gene_id "Cuff.1469"; gene_name "Cuff.1469"; locus "RLOC_00006960";
chr1	Cufflinks_novel	exon	72302332	72302359	27	transcript_id "cuff_147"; gene_id "Cuff.147"; gene_name "Cuff.147"; locus "RLOC_00000484";
chr1	Cufflinks_novel	exon	72303627	72303654	27	transcript_id "cuff_147"; gene_id "Cuff.147"; gene_name "Cuff.147"; locus "RLOC_00000484";
chr14	Cufflinks_novel	exon	24919553	24919583	30	transcript_id "cuff_1470"; gene_id "Cuff.1470"; gene_name "Cuff.1470"; locus "RLOC_00006962";
chr14	Cufflinks_novel	exon	24918492	24918579	87	transcript_id "cuff_1470"; gene_id "Cuff.1470"; gene_name "Cuff.1470"; locus "RLOC_00006962";
chr14	Cufflinks_novel	exon	24918163	24918430	267	transcript_id "cuff_1470"; gene_id "Cuff.1470"; gene_name "Cuff.1470"; locus "RLOC_00006962";
chr14	Cufflinks_novel	exon	24920052	24920384	332	transcript_id "cuff_1470"; gene_id "Cuff.1470"; gene_name "Cuff.1470"; locus "RLOC_00006962";
chr14	Cufflinks_novel	exon	25066991	25067018	27	transcript_id "cuff_1471"; gene_id "Cuff.1471"; gene_name "Cuff.1471"; locus "RLOC_00006966";
chr14	Cufflinks_novel	exon	25065221	25065290	69	transcript_id "cuff_1471"; gene_id "Cuff.1471"; gene_name "Cuff.1471"; locus "RLOC_00006966";
chr14	Cufflinks_novel	exon	25156563	25156624	61	transcript_id "cuff_1472"; gene_id "Cuff.1472"; gene_name "Cuff.1472"; locus "RLOC_00006968";
chr14	Cufflinks_novel	exon	25156874	25156998	124	transcript_id "cuff_1472"; gene_id "Cuff.1472"; gene_name "Cuff.1472"; locus "RLOC_00006968";
chr14	Cufflinks_novel	exon	25157081	25157298	217	transcript_id "cuff_1472"; gene_id "Cuff.1472"; gene_name "Cuff.1472"; locus "RLOC_00006968";
chr14	Cufflinks_novel	exon	25196600	25196627	27	transcript_id "cuff_1473"; gene_id "Cuff.1473"; gene_name "Cuff.1473"; locus "RLOC_00006973";
chr14	Cufflinks_novel	exon	25195932	25196137	205	transcript_id "cuff_1473"; gene_id "Cuff.1473"; gene_name "Cuff.1473"; locus "RLOC_00006973";
chr14	Cufflinks_novel	exon	25197606	25197855	249	transcript_id "cuff_1473"; gene_id "Cuff.1473"; gene_name "Cuff.1473"; locus "RLOC_00006973";
chr14	Cufflinks_novel	exon	25258179	25258206	27	transcript_id "cuff_1474"; gene_id "Cuff.1474"; gene_name "Cuff.1474"; locus "RLOC_00006975";
chr14	Cufflinks_novel	exon	25258267	25258294	27	transcript_id "cuff_1474"; gene_id "Cuff.1474"; gene_name "Cuff.1474"; locus "RLOC_00006975";
chr14	Cufflinks_novel	exon	25261623	25261688	65	transcript_id "cuff_1474"; gene_id "Cuff.1474"; gene_name "Cuff.1474"; locus "RLOC_00006975";
chr14	Cufflinks_novel	exon	25259556	25259737	181	transcript_id "cuff_1474"; gene_id "Cuff.1474"; gene_name "Cuff.1474"; locus "RLOC_00006975";
chr14	Cufflinks_novel	exon	25263934	25264137	203	transcript_id "cuff_1475"; gene_id "Cuff.1475"; gene_name "Cuff.1475"; locus "RLOC_00006976";
chr14	Cufflinks_novel	exon	25265450	25265662	212	transcript_id "cuff_1475"; gene_id "Cuff.1475"; gene_name "Cuff.1475"; locus "RLOC_00006976";
chr14	Cufflinks_novel	exon	25433344	25433371	27	transcript_id "cuff_1476"; gene_id "Cuff.1476"; gene_name "Cuff.1476"; locus "RLOC_00006979";
chr14	Cufflinks_novel	exon	25437200	25437227	27	transcript_id "cuff_1476"; gene_id "Cuff.1476"; gene_name "Cuff.1476"; locus "RLOC_00006979";
chr14	Cufflinks_novel	exon	25435068	25435097	29	transcript_id "cuff_1476"; gene_id "Cuff.1476"; gene_name "Cuff.1476"; locus "RLOC_00006979";
chr14	Cufflinks_novel	exon	25435670	25435707	37	transcript_id "cuff_1476"; gene_id "Cuff.1476"; gene_name "Cuff.1476"; locus "RLOC_00006979";
chr14	Cufflinks_novel	exon	25438907	25438986	79	transcript_id "cuff_1476"; gene_id "Cuff.1476"; gene_name "Cuff.1476"; locus "RLOC_00006979";
chr14	Cufflinks_novel	exon	25436509	25436633	124	transcript_id "cuff_1476"; gene_id "Cuff.1476"; gene_name "Cuff.1476"; locus "RLOC_00006979";
chr14	Cufflinks_novel	exon	25434468	25435000	532	transcript_id "cuff_1476"; gene_id "Cuff.1476"; gene_name "Cuff.1476"; locus "RLOC_00006979";
chr14	Cufflinks_novel	exon	25445163	25445190	27	transcript_id "cuff_1477"; gene_id "Cuff.1477"; gene_name "Cuff.1477"; locus "RLOC_00006980";
chr14	Cufflinks_novel	exon	25450963	25450990	27	transcript_id "cuff_1477"; gene_id "Cuff.1477"; gene_name "Cuff.1477"; locus "RLOC_00006980";
chr14	Cufflinks_novel	exon	25444204	25444262	58	transcript_id "cuff_1477"; gene_id "Cuff.1477"; gene_name "Cuff.1477"; locus "RLOC_00006980";
chr14	Cufflinks_novel	exon	25450141	25450248	107	transcript_id "cuff_1477"; gene_id "Cuff.1477"; gene_name "Cuff.1477"; locus "RLOC_00006980";
chr14	Cufflinks_novel	exon	25443940	25444065	125	transcript_id "cuff_1477"; gene_id "Cuff.1477"; gene_name "Cuff.1477"; locus "RLOC_00006980";
chr14	Cufflinks_novel	exon	25451428	25451565	137	transcript_id "cuff_1477"; gene_id "Cuff.1477"; gene_name "Cuff.1477"; locus "RLOC_00006980";
chr14	Cufflinks_novel	exon	25447120	25447283	163	transcript_id "cuff_1477"; gene_id "Cuff.1477"; gene_name "Cuff.1477"; locus "RLOC_00006980";
chr14	Cufflinks_novel	exon	25442847	25443048	201	transcript_id "cuff_1477"; gene_id "Cuff.1477"; gene_name "Cuff.1477"; locus "RLOC_00006980";
chr14	Cufflinks_novel	exon	25443486	25443694	208	transcript_id "cuff_1477"; gene_id "Cuff.1477"; gene_name "Cuff.1477"; locus "RLOC_00006980";
chr14	Cufflinks_novel	exon	25441407	25441643	236	transcript_id "cuff_1477"; gene_id "Cuff.1477"; gene_name "Cuff.1477"; locus "RLOC_00006980";
chr14	Cufflinks_novel	exon	25449001	25449287	286	transcript_id "cuff_1477"; gene_id "Cuff.1477"; gene_name "Cuff.1477"; locus "RLOC_00006980";
chr14	Cufflinks_novel	exon	25441867	25442171	304	transcript_id "cuff_1477"; gene_id "Cuff.1477"; gene_name "Cuff.1477"; locus "RLOC_00006980";
chr14	Cufflinks_novel	exon	25453851	25453936	85	transcript_id "cuff_1478"; gene_id "Cuff.1478"; gene_name "Cuff.1478"; locus "RLOC_00006981";
chr14	Cufflinks_novel	exon	25454336	25454683	347	transcript_id "cuff_1478"; gene_id "Cuff.1478"; gene_name "Cuff.1478"; locus "RLOC_00006981";
chr14	Cufflinks_novel	exon	25459115	25459159	44	transcript_id "cuff_1479"; gene_id "Cuff.1479"; gene_name "Cuff.1479"; locus "RLOC_00006982";
chr14	Cufflinks_novel	exon	25459384	25459596	212	transcript_id "cuff_1479"; gene_id "Cuff.1479"; gene_name "Cuff.1479"; locus "RLOC_00006982";
chr1	Cufflinks_novel	exon	72624801	72624859	58	transcript_id "cuff_148"; gene_id "Cuff.148"; gene_name "Cuff.148"; locus "RLOC_00000489";
chr1	Cufflinks_novel	exon	72624958	72625030	72	transcript_id "cuff_148"; gene_id "Cuff.148"; gene_name "Cuff.148"; locus "RLOC_00000489";
chr14	Cufflinks_novel	exon	25464009	25464084	75	transcript_id "cuff_1480"; gene_id "Cuff.1480"; gene_name "Cuff.1480"; locus "RLOC_00006983";
chr14	Cufflinks_novel	exon	25463417	25463511	94	transcript_id "cuff_1480"; gene_id "Cuff.1480"; gene_name "Cuff.1480"; locus "RLOC_00006983";
chr14	Cufflinks_novel	exon	25465799	25465910	111	transcript_id "cuff_1480"; gene_id "Cuff.1480"; gene_name "Cuff.1480"; locus "RLOC_00006983";
chr14	Cufflinks_novel	exon	25463154	25463363	209	transcript_id "cuff_1480"; gene_id "Cuff.1480"; gene_name "Cuff.1480"; locus "RLOC_00006983";
chr14	Cufflinks_novel	exon	25464646	25464855	209	transcript_id "cuff_1480"; gene_id "Cuff.1480"; gene_name "Cuff.1480"; locus "RLOC_00006983";
chr14	Cufflinks_novel	exon	25471394	25471421	27	transcript_id "cuff_1481"; gene_id "Cuff.1481"; gene_name "Cuff.1481"; locus "RLOC_00006984";
chr14	Cufflinks_novel	exon	25476085	25476215	130	transcript_id "cuff_1481"; gene_id "Cuff.1481"; gene_name "Cuff.1481"; locus "RLOC_00006984";
chr14	Cufflinks_novel	exon	25472898	25473032	134	transcript_id "cuff_1481"; gene_id "Cuff.1481"; gene_name "Cuff.1481"; locus "RLOC_00006984";
chr14	Cufflinks_novel	exon	25475344	25475521	177	transcript_id "cuff_1481"; gene_id "Cuff.1481"; gene_name "Cuff.1481"; locus "RLOC_00006984";
chr14	Cufflinks_novel	exon	25473808	25474152	344	transcript_id "cuff_1481"; gene_id "Cuff.1481"; gene_name "Cuff.1481"; locus "RLOC_00006984";
chr14	Cufflinks_novel	exon	25534864	25535034	170	transcript_id "cuff_1482"; gene_id "Cuff.1482"; gene_name "Cuff.1482"; locus "RLOC_00006985";
chr14	Cufflinks_novel	exon	25535793	25536050	257	transcript_id "cuff_1482"; gene_id "Cuff.1482"; gene_name "Cuff.1482"; locus "RLOC_00006985";
chr14	Cufflinks_novel	exon	25557315	25557385	70	transcript_id "cuff_1483"; gene_id "Cuff.1483"; gene_name "Cuff.1483"; locus "RLOC_00006986";
chr14	Cufflinks_novel	exon	25555667	25555738	71	transcript_id "cuff_1483"; gene_id "Cuff.1483"; gene_name "Cuff.1483"; locus "RLOC_00006986";
chr14	Cufflinks_novel	exon	25555087	25555175	88	transcript_id "cuff_1483"; gene_id "Cuff.1483"; gene_name "Cuff.1483"; locus "RLOC_00006986";
chr14	Cufflinks_novel	exon	25551690	25551849	159	transcript_id "cuff_1483"; gene_id "Cuff.1483"; gene_name "Cuff.1483"; locus "RLOC_00006986";
chr14	Cufflinks_novel	exon	25553417	25553592	175	transcript_id "cuff_1483"; gene_id "Cuff.1483"; gene_name "Cuff.1483"; locus "RLOC_00006986";
chr14	Cufflinks_novel	exon	25567303	25567398	95	transcript_id "cuff_1484"; gene_id "Cuff.1484"; gene_name "Cuff.1484"; locus "RLOC_00006987";
chr14	Cufflinks_novel	exon	25567882	25568017	135	transcript_id "cuff_1484"; gene_id "Cuff.1484"; gene_name "Cuff.1484"; locus "RLOC_00006987";
chr14	Cufflinks_novel	exon	25608539	25608566	27	transcript_id "cuff_1485"; gene_id "Cuff.1485"; gene_name "Cuff.1485"; locus "RLOC_00006988";
chr14	Cufflinks_novel	exon	25607935	25608075	140	transcript_id "cuff_1485"; gene_id "Cuff.1485"; gene_name "Cuff.1485"; locus "RLOC_00006988";
chr14	Cufflinks_novel	exon	25618299	25618498	199	transcript_id "cuff_1486"; gene_id "Cuff.1486"; gene_name "Cuff.1486"; locus "RLOC_00006989";
chr14	Cufflinks_novel	exon	25619761	25620006	245	transcript_id "cuff_1486"; gene_id "Cuff.1486"; gene_name "Cuff.1486"; locus "RLOC_00006989";
chr14	Cufflinks_novel	exon	25624266	25624378	112	transcript_id "cuff_1487"; gene_id "Cuff.1487"; gene_name "Cuff.1487"; locus "RLOC_00006990";
chr14	Cufflinks_novel	exon	25623874	25624063	189	transcript_id "cuff_1487"; gene_id "Cuff.1487"; gene_name "Cuff.1487"; locus "RLOC_00006990";
chr14	Cufflinks_novel	exon	25622118	25622447	329	transcript_id "cuff_1487"; gene_id "Cuff.1487"; gene_name "Cuff.1487"; locus "RLOC_00006990";
chr14	Cufflinks_novel	exon	25628395	25628560	165	transcript_id "cuff_1488"; gene_id "Cuff.1488"; gene_name "Cuff.1488"; locus "RLOC_00006991";
chr14	Cufflinks_novel	exon	25627337	25627725	388	transcript_id "cuff_1488"; gene_id "Cuff.1488"; gene_name "Cuff.1488"; locus "RLOC_00006991";
chr14	Cufflinks_novel	exon	25637365	25637392	27	transcript_id "cuff_1489"; gene_id "Cuff.1489"; gene_name "Cuff.1489"; locus "RLOC_00006992";
chr14	Cufflinks_novel	exon	25638256	25638283	27	transcript_id "cuff_1489"; gene_id "Cuff.1489"; gene_name "Cuff.1489"; locus "RLOC_00006992";
chr1	Cufflinks_novel	exon	73063906	73063933	27	transcript_id "cuff_149"; gene_id "Cuff.149"; gene_name "Cuff.149"; locus "RLOC_00000496";
chr1	Cufflinks_novel	exon	73062562	73062949	387	transcript_id "cuff_149"; gene_id "Cuff.149"; gene_name "Cuff.149"; locus "RLOC_00000496";
chr14	Cufflinks_novel	exon	25642880	25643001	121	transcript_id "cuff_1490"; gene_id "Cuff.1490"; gene_name "Cuff.1490"; locus "RLOC_00006993";
chr14	Cufflinks_novel	exon	25642290	25642418	128	transcript_id "cuff_1490"; gene_id "Cuff.1490"; gene_name "Cuff.1490"; locus "RLOC_00006993";
chr14	Cufflinks_novel	exon	25643225	25643440	215	transcript_id "cuff_1490"; gene_id "Cuff.1490"; gene_name "Cuff.1490"; locus "RLOC_00006993";
chr14	Cufflinks_novel	exon	25643796	25644095	299	transcript_id "cuff_1490"; gene_id "Cuff.1490"; gene_name "Cuff.1490"; locus "RLOC_00006993";
chr14	Cufflinks_novel	exon	25648312	25648342	30	transcript_id "cuff_1491"; gene_id "Cuff.1491"; gene_name "Cuff.1491"; locus "RLOC_00006994";
chr14	Cufflinks_novel	exon	25651514	25651568	54	transcript_id "cuff_1491"; gene_id "Cuff.1491"; gene_name "Cuff.1491"; locus "RLOC_00006994";
chr14	Cufflinks_novel	exon	25649639	25649770	131	transcript_id "cuff_1491"; gene_id "Cuff.1491"; gene_name "Cuff.1491"; locus "RLOC_00006994";
chr14	Cufflinks_novel	exon	25650721	25650893	172	transcript_id "cuff_1491"; gene_id "Cuff.1491"; gene_name "Cuff.1491"; locus "RLOC_00006994";
chr14	Cufflinks_novel	exon	25647815	25648001	186	transcript_id "cuff_1491"; gene_id "Cuff.1491"; gene_name "Cuff.1491"; locus "RLOC_00006994";
chr14	Cufflinks_novel	exon	25665894	25665921	27	transcript_id "cuff_1492"; gene_id "Cuff.1492"; gene_name "Cuff.1492"; locus "RLOC_00006995";
chr14	Cufflinks_novel	exon	25665636	25665738	102	transcript_id "cuff_1492"; gene_id "Cuff.1492"; gene_name "Cuff.1492"; locus "RLOC_00006995";
chr14	Cufflinks_novel	exon	25682212	25682239	27	transcript_id "cuff_1493"; gene_id "Cuff.1493"; gene_name "Cuff.1493"; locus "RLOC_00006996";
chr14	Cufflinks_novel	exon	25683490	25683584	94	transcript_id "cuff_1493"; gene_id "Cuff.1493"; gene_name "Cuff.1493"; locus "RLOC_00006996";
chr14	Cufflinks_novel	exon	25959557	25959584	27	transcript_id "cuff_1494"; gene_id "Cuff.1494"; gene_name "Cuff.1494"; locus "RLOC_00006997";
chr14	Cufflinks_novel	exon	25961365	25961425	60	transcript_id "cuff_1494"; gene_id "Cuff.1494"; gene_name "Cuff.1494"; locus "RLOC_00006997";
chr14	Cufflinks_novel	exon	25963270	25963364	94	transcript_id "cuff_1494"; gene_id "Cuff.1494"; gene_name "Cuff.1494"; locus "RLOC_00006997";
chr14	Cufflinks_novel	exon	26244213	26244232	19	transcript_id "cuff_1495"; gene_id "Cuff.1495"; gene_name "Cuff.1495"; locus "RLOC_00006998";
chr14	Cufflinks_novel	exon	26243590	26243610	20	transcript_id "cuff_1495"; gene_id "Cuff.1495"; gene_name "Cuff.1495"; locus "RLOC_00006998";
chr14	Cufflinks_novel	exon	26526715	26526742	27	transcript_id "cuff_1496"; gene_id "Cuff.1496"; gene_name "Cuff.1496"; locus "RLOC_00007004";
chr14	Cufflinks_novel	exon	26524807	26524835	28	transcript_id "cuff_1496"; gene_id "Cuff.1496"; gene_name "Cuff.1496"; locus "RLOC_00007004";
chr14	Cufflinks_novel	exon	27134986	27135186	200	transcript_id "cuff_1497"; gene_id "Cuff.1497"; gene_name "Cuff.1497"; locus "RLOC_00007019";
chr14	Cufflinks_novel	exon	27135584	27135831	247	transcript_id "cuff_1497"; gene_id "Cuff.1497"; gene_name "Cuff.1497"; locus "RLOC_00007019";
chr14	Cufflinks_novel	exon	27143966	27144038	72	transcript_id "cuff_1498"; gene_id "Cuff.1498"; gene_name "Cuff.1498"; locus "RLOC_00007020";
chr14	Cufflinks_novel	exon	27143214	27143288	74	transcript_id "cuff_1498"; gene_id "Cuff.1498"; gene_name "Cuff.1498"; locus "RLOC_00007020";
chr14	Cufflinks_novel	exon	27137887	27138009	122	transcript_id "cuff_1498"; gene_id "Cuff.1498"; gene_name "Cuff.1498"; locus "RLOC_00007020";
chr14	Cufflinks_novel	exon	27141065	27141214	149	transcript_id "cuff_1498"; gene_id "Cuff.1498"; gene_name "Cuff.1498"; locus "RLOC_00007020";
chr14	Cufflinks_novel	exon	27138625	27138885	260	transcript_id "cuff_1498"; gene_id "Cuff.1498"; gene_name "Cuff.1498"; locus "RLOC_00007020";
chr14	Cufflinks_novel	exon	27139969	27140449	480	transcript_id "cuff_1498"; gene_id "Cuff.1498"; gene_name "Cuff.1498"; locus "RLOC_00007020";
chr14	Cufflinks_novel	exon	27156958	27156985	27	transcript_id "cuff_1499"; gene_id "Cuff.1499"; gene_name "Cuff.1499"; locus "RLOC_00007021";
chr14	Cufflinks_novel	exon	27156447	27156502	55	transcript_id "cuff_1499"; gene_id "Cuff.1499"; gene_name "Cuff.1499"; locus "RLOC_00007021";
chr1	Cufflinks_novel	exon	14363818	14363953	135	transcript_id "cuff_15"; gene_id "Cuff.15"; gene_name "Cuff.15"; locus "RLOC_00000056";
chr1	Cufflinks_novel	exon	14364069	14364249	180	transcript_id "cuff_15"; gene_id "Cuff.15"; gene_name "Cuff.15"; locus "RLOC_00000056";
chr1	Cufflinks_novel	exon	73069292	73069319	27	transcript_id "cuff_150"; gene_id "Cuff.150"; gene_name "Cuff.150"; locus "RLOC_00000497";
chr1	Cufflinks_novel	exon	73071895	73072042	147	transcript_id "cuff_150"; gene_id "Cuff.150"; gene_name "Cuff.150"; locus "RLOC_00000497";
chr1	Cufflinks_novel	exon	73071157	73071408	251	transcript_id "cuff_150"; gene_id "Cuff.150"; gene_name "Cuff.150"; locus "RLOC_00000497";
chr14	Cufflinks_novel	exon	27168560	27168587	27	transcript_id "cuff_1500"; gene_id "Cuff.1500"; gene_name "Cuff.1500"; locus "RLOC_00007022";
chr14	Cufflinks_novel	exon	27167954	27167982	28	transcript_id "cuff_1500"; gene_id "Cuff.1500"; gene_name "Cuff.1500"; locus "RLOC_00007022";
chr14	Cufflinks_novel	exon	27169282	27169310	28	transcript_id "cuff_1500"; gene_id "Cuff.1500"; gene_name "Cuff.1500"; locus "RLOC_00007022";
chr14	Cufflinks_novel	exon	27168154	27168229	75	transcript_id "cuff_1500"; gene_id "Cuff.1500"; gene_name "Cuff.1500"; locus "RLOC_00007022";
chr14	Cufflinks_novel	exon	27169428	27169580	152	transcript_id "cuff_1500"; gene_id "Cuff.1500"; gene_name "Cuff.1500"; locus "RLOC_00007022";
chr14	Cufflinks_novel	exon	27169659	27169822	163	transcript_id "cuff_1500"; gene_id "Cuff.1500"; gene_name "Cuff.1500"; locus "RLOC_00007022";
chr14	Cufflinks_novel	exon	27168699	27169122	423	transcript_id "cuff_1500"; gene_id "Cuff.1500"; gene_name "Cuff.1500"; locus "RLOC_00007022";
chr14	Cufflinks_novel	exon	27183244	27183292	48	transcript_id "cuff_1501"; gene_id "Cuff.1501"; gene_name "Cuff.1501"; locus "RLOC_00007023";
chr14	Cufflinks_novel	exon	27182289	27182444	155	transcript_id "cuff_1501"; gene_id "Cuff.1501"; gene_name "Cuff.1501"; locus "RLOC_00007023";
chr14	Cufflinks_novel	exon	27183745	27183987	242	transcript_id "cuff_1501"; gene_id "Cuff.1501"; gene_name "Cuff.1501"; locus "RLOC_00007023";
chr14	Cufflinks_novel	exon	27196751	27196873	122	transcript_id "cuff_1502"; gene_id "Cuff.1502"; gene_name "Cuff.1502"; locus "RLOC_00007024";
chr14	Cufflinks_novel	exon	27197327	27197487	160	transcript_id "cuff_1502"; gene_id "Cuff.1502"; gene_name "Cuff.1502"; locus "RLOC_00007024";
chr14	Cufflinks_novel	exon	27198404	27198586	182	transcript_id "cuff_1502"; gene_id "Cuff.1502"; gene_name "Cuff.1502"; locus "RLOC_00007024";
chr14	Cufflinks_novel	exon	27201606	27201633	27	transcript_id "cuff_1503"; gene_id "Cuff.1503"; gene_name "Cuff.1503"; locus "RLOC_00007025";
chr14	Cufflinks_novel	exon	27200995	27201168	173	transcript_id "cuff_1503"; gene_id "Cuff.1503"; gene_name "Cuff.1503"; locus "RLOC_00007025";
chr14	Cufflinks_novel	exon	27210829	27210934	105	transcript_id "cuff_1504"; gene_id "Cuff.1504"; gene_name "Cuff.1504"; locus "RLOC_00007026";
chr14	Cufflinks_novel	exon	27206653	27206802	149	transcript_id "cuff_1504"; gene_id "Cuff.1504"; gene_name "Cuff.1504"; locus "RLOC_00007026";
chr14	Cufflinks_novel	exon	27206990	27207168	178	transcript_id "cuff_1504"; gene_id "Cuff.1504"; gene_name "Cuff.1504"; locus "RLOC_00007026";
chr14	Cufflinks_novel	exon	27208400	27208937	537	transcript_id "cuff_1504"; gene_id "Cuff.1504"; gene_name "Cuff.1504"; locus "RLOC_00007026";
chr14	Cufflinks_novel	exon	27218327	27218397	70	transcript_id "cuff_1505"; gene_id "Cuff.1505"; gene_name "Cuff.1505"; locus "RLOC_00007027";
chr14	Cufflinks_novel	exon	27217804	27217914	110	transcript_id "cuff_1505"; gene_id "Cuff.1505"; gene_name "Cuff.1505"; locus "RLOC_00007027";
chr14	Cufflinks_novel	exon	27217361	27217578	217	transcript_id "cuff_1505"; gene_id "Cuff.1505"; gene_name "Cuff.1505"; locus "RLOC_00007027";
chr14	Cufflinks_novel	exon	27512994	27513088	94	transcript_id "cuff_1506"; gene_id "Cuff.1506"; gene_name "Cuff.1506"; locus "RLOC_00007032";
chr14	Cufflinks_novel	exon	27512755	27512930	175	transcript_id "cuff_1506"; gene_id "Cuff.1506"; gene_name "Cuff.1506"; locus "RLOC_00007032";
chr14	Cufflinks_novel	exon	27525546	27525582	36	transcript_id "cuff_1507"; gene_id "Cuff.1507"; gene_name "Cuff.1507"; locus "RLOC_00007033";
chr14	Cufflinks_novel	exon	27528152	27528219	67	transcript_id "cuff_1507"; gene_id "Cuff.1507"; gene_name "Cuff.1507"; locus "RLOC_00007033";
chr14	Cufflinks_novel	exon	27530467	27530551	84	transcript_id "cuff_1507"; gene_id "Cuff.1507"; gene_name "Cuff.1507"; locus "RLOC_00007033";
chr14	Cufflinks_novel	exon	27529596	27529715	119	transcript_id "cuff_1507"; gene_id "Cuff.1507"; gene_name "Cuff.1507"; locus "RLOC_00007033";
chr14	Cufflinks_novel	exon	27526263	27526405	142	transcript_id "cuff_1507"; gene_id "Cuff.1507"; gene_name "Cuff.1507"; locus "RLOC_00007033";
chr14	Cufflinks_novel	exon	27526607	27526806	199	transcript_id "cuff_1507"; gene_id "Cuff.1507"; gene_name "Cuff.1507"; locus "RLOC_00007033";
[truncated: 15,279 more rows]

## Sheet: Table S5
Table S5. CB-associated genes.
symbol	FPKM	chrom	start	end	strand
Tnp1	14304.4	chr1	73061648	73062473	-
Ip6k1	5146.34	chr9	107904978	107951113	+
Prm1	4442.26	chr16	10796424	10796916	-
Tnp2	4024.45	chr16	10788027	10788748	-
Prm2	3963.46	chr16	10791473	10792190	-
Spata6	2987.97	chr4	111392614	111501745	+
Ldhc	2900.9	chr7	54116632	54133512	+
Gm9758	2895.07	chr5	14910123	14914889	-
Odf1	2582.51	chr15	38148957	38156490	+
Cypt12	2512.15	chr3	17848443	17848952	+
1700022P22Rik	2372.65	chr1	192860700	192866820	+
Braf	2242.79	chr6	39553236	39675462	-
Meig1	2241.79	chr2	3326314	3339920	-
Exosc3	2202.32	chr4	45329501	45333475	-
Uqcc	2101.21	chr2	155672621	155756046	-
Smcp	2097.53	chr3	92387787	92392946	-
Fam24a	2033.97	chr7	138478135	138480230	+
Dbil5	1836.64	chr11	76031114	76032167	+
Spa17	1798.69	chr9	37410878	37421305	-
Gm3417	1733.87	chr17	15101152	15115776	-
Cox8c	1723.45	chr12	104137515	104138744	+
Mmadhc	1567.4	chr2	50135400	50152197	-
Ropn1	1554.16	chr16	34651296	34678696	+
Rabl2	1551.91	chr15	89412957	89422354	-
Skp1a	1542.89	chr11	52045496	52060360	+
Calm3	1506.37	chr7	17500727	17509381	-
Tmsb15a	1472.2	chrX	132253205	132255212	-
Fabp9	1465.16	chr3	10193623	10197222	-
1700092M07Rik	1399.46	chr19	8815207	8815715	+
Speer4d	1372.01	chr5	15124916	15129682	+
Acyp1	1363.88	chr12	86613347	86621385	-
AI314831	1349.51	chr2	104916694	104966667	-
Tmco5	1337.07	chr2	116704426	116718236	+
Gm17019	1331.68	chr5	15028949	15033007	-
Aif1	1305.35	chr17	35307936	35312946	-
Ppp4r1	1288.17	chr17	66132694	66191266	+
Gm9999	1235.72	chr7	54232001	54243173	+
Hnrnph1	1216.77	chr11	50191220	50200030	+
Ccl9	1191.16	chr11	83386418	83392138	-
Clk4	1186.08	chr11	51076672	51095266	+
Ppp1r11	1174.64	chr17	37085299	37088737	-
Ube2g2	1159.3	chr10	77085065	77108735	+
Ywhae	1125.32	chr11	75546388	75579343	+
Tcte3	1110.74	chr17	15164117	15178523	-
Hmgb4	1085.63	chr4	127937455	127938139	-
Tle3	1068.08	chr9	61220172	61266304	+
Spag4	1025.58	chr2	155890948	155895235	+
1700065I17Rik	1010.82	chr18	56748001	56754433	+
4732415M23Rik	1004.01	chr8	125736757	125745945	+
1700006E09Rik	995.83	chr11	101848369	101853578	+
Fam107b	983.339	chr2	3630729	3699406	+
Manf	980.417	chr9	106789745	106794269	-
1700008A04Rik	974.937	chr11	32720375	32724594	-
1700029J11Rik	944.2	chr2	172298053	172299816	+
Sub1	941.488	chr15	11911093	11925762	-
Oaz3	925.483	chr3	94237087	94240538	-
Crisp2	922.072	chr17	40901682	40931095	-
Ddx5	896.228	chr11	106641669	106649808	-
Gtsf1l	883.259	chr2	162912766	162915337	-
Prm3	879.482	chr16	10790600	10791007	-
Tdrd7	877.624	chr4	46000333	46047631	+
Spata19	870.759	chr9	27204405	27209295	+
Bbs5	863.494	chr2	69485311	69505626	+
Rnf25	860.497	chr1	74640325	74647971	-
Cabyr	858.071	chr18	12899863	12913651	+
Asrgl1	855.325	chr19	9186208	9210056	-
Rnf32	850.326	chr5	29524545	29551831	+
Speer4e	845.564	chr5	14933630	14938475	-
Sf1	834.832	chr19	6363689	6378038	+
Calm1	830.431	chr12	101437750	101448016	+
Slc22a14	830.209	chr9	119078573	119099511	-
Mlf1	818.974	chr3	67178018	67203922	+
Vars	818.923	chr17	35137851	35153274	+
Ccdc30	817.679	chr4	118996443	119088126	-
1700009P17Rik	803.334	chr1	173051791	173057098	+
Adig	799.278	chr2	158328347	158333934	+
1700007K09Rik	798.587	chr7	138469444	138473013	-
Psma6	797.094	chr12	56499811	56519446	+
Tmco2	796.393	chr4	120778255	120781831	-
Gstt4	792.269	chr10	75277688	75285288	-
Csnk2b	789.552	chr17	35253139	35258392	-
Fkbp7	779.969	chr2	76501090	76511155	-
Iqcf3	778.127	chr9	106445719	106463956	-
Dnajc7	759.545	chr11	100444149	100481482	-
Rsph1	758.336	chr17	31391964	31414301	-
Ccdc19	752.294	chr1	174451260	174476001	+
Pabpc1	750.748	chr15	36525412	36538728	-
Hspa4l	738.403	chr3	40549534	40594287	+
Speer3	737.267	chr5	13791618	13796819	+
1700025K23Rik	733.598	chr10	38838613	38853701	-
BC089491	730.179	chr7	29069670	29076153	-
Ndel1	729.845	chr11	68634948	68666633	-
Rnf220	729.098	chr4	116944068	117169520	-
1700129C05Rik	723.142	chr14	59751876	59761730	-
Kpna6	722.026	chr4	129321222	129350011	-
Trim27	721.683	chr13	21271799	21286592	+
1700026L06Rik	720.331	chr2	28547599	28555171	-
Gstm5	705.431	chr3	107698771	107701603	+
Eef1d	703.565	chr15	75725229	75739770	-
1700029H14Rik	700.351	chr8	13550732	13562448	-
Sod1	700.23	chr16	90220986	90226569	+
Tmem190	698.157	chr7	4734541	4735942	+
Bcas2	686.049	chr3	102975633	102983077	+
Ybx2	685.506	chr11	69749400	69755101	+
4930534B04Rik	681.902	chr12	92236931	92622849	-
Ncrna00085	681.82	chr17	17967938	17976035	+
Mtch2	680.685	chr2	90687311	90706791	+
Ankrd5	679.439	chr2	136358056	136381590	+
Ift81	675.346	chr5	123000212	123064527	-
Uqcrq	673.965	chr11	53242449	53244333	-
Vdac2	664.905	chr14	22650782	22665101	+
Lars2	663.878	chr9	123276057	123371782	+
St6galnac2	660.775	chr11	116538018	116555974	-
H3f3a	659.588	chr1	182732698	182743734	-
Acsl1	658.029	chr8	47556395	47621404	+
Psmc3	657.767	chr2	90894172	90899595	+
D11Wsu47e	646.366	chr11	113545725	113555961	+
Ddhd1	639.008	chr14	46212848	46277818	-
1700034O15Rik	637.19	chr6	41634429	41635716	+
Orc1	631.486	chr4	108252058	108287436	+
Hsp90b1	629.63	chr10	86153585	86168189	-
Speer4f	629.153	chr5	16981939	16986754	+
Calr	626.774	chr8	87365986	87370830	-
Hsp90aa1	625.864	chr12	111929245	111934605	-
Ttc23l	624.522	chr15	10433701	10488423	-
Nudcd2	624.003	chr11	40547143	40553549	+
Lyrm7	619.063	chr11	54652790	54674093	-
1700018L24Rik	616.319	chr8	11840520	11855761	+
BC048502	613.554	chr15	103269390	103278890	-
Arih1	608.319	chr9	59236360	59334181	-
Spz1	605.618	chr13	93344586	93346187	-
Efcab9	600.837	chr11	32422732	32427574	-
4930519G04Rik	600.554	chr5	115303722	115333888	+
Angel1	593.532	chr12	88041451	88067410	-
Tex24	593.114	chr8	28454865	28459660	+
Kctd9	588.907	chr14	68334154	68360367	+
Lrrc23	585.001	chr6	124719880	124729736	-
Gemin4	579.654	chr11	76024072	76031074	-
Nipsnap3a	579.634	chr4	53002155	53013726	+
Otud4	578.255	chr8	82163574	82201654	+
Fus	575.461	chr7	135110992	135125545	+
Ccdc101	573.434	chr7	133792822	133816293	+
Abhd5	571.995	chr9	122260733	122290641	+
Snap23	569.631	chr2	120393406	120426458	+
4933404M02Rik	564.147	chr2	70346875	70378941	+
4933402J07Rik	561.657	chr8	90087805	90113096	+
Vhl	560.606	chr6	113574014	113581627	+
Agpat6	556.948	chr8	24283417	24318925	-
Drg1	556.692	chr11	3149924	3166389	-
1110032A03Rik	555.684	chr9	50570932	50576257	-
Als2cr11	553.677	chr1	59107349	59151744	-
St13	553.232	chr15	81195473	81230124	-
Calm2	552.795	chr17	87832740	87846275	-
1700024G13Rik	551.125	chr14	33189687	33201559	-
Ccdc63	548.874	chr5	122558064	122588071	-
Akap12	548.619	chr10	5987069	6080212	-
Amn1	541.329	chr6	149106098	149137234	-
Speer2	538.223	chr16	69857118	69863989	-
4933402N22Rik	537.617	chr5	11918042	11922804	+
Dusp3	534.125	chr11	101832457	101846105	-
Hist1h2ba	531.597	chr13	24025641	24026025	-
Shfm1	530.063	chr6	6508274	6528658	-
Gtf2a2	527.002	chr9	69860356	69870654	+
Morn3	523.568	chr5	123487135	123496829	-
Allc	522.311	chr12	29238619	29267348	-
Dydc1	520.662	chr14	41886199	41905486	+
Grcc10	520.487	chr6	124689201	124691097	-
Spaca1	520.146	chr4	34115288	34137042	-
4931429L15Rik	519.319	chr9	46111443	46128069	-
Cox4i1	517.795	chr8	123192189	123198109	+
Mt2	515.143	chr8	96696517	96697467	+
Ewsr1	513.579	chr11	4969690	4999080	-
Tssk3	511.361	chr4	129166251	129168014	-
Rmnd1	504.267	chr10	5914188	5943372	+
2810408A11Rik	504.107	chr11	69710859	69714488	-
Pttg1ip	503.7	chr10	77044511	77061477	+
1700011A15Rik	502.426	chr15	101278175	101284340	+
Nphp1	501.778	chr2	127566467	127614590	-
Xpo6	501.422	chr7	133245232	133343922	-
Hook1	499.799	chr4	95634069	95690965	+
Ccdc91	497.133	chr6	147424392	147581134	+
Sucla2	494.452	chr14	73952592	73995949	+
Galntl5	493.33	chr5	24687297	24726107	+
Dynlrb2	492.4	chr8	119028914	119039815	+
Zfp37	491.282	chr4	61850576	61869580	-
Cst8	490.88	chr2	148624574	148631320	+
2210404O07Rik	489.65	chr10	80855808	80857824	+
4930449I24Rik	488.495	chr5	147313974	147316759	+
Ythdc1	487.917	chr5	87233514	87265682	+
Dkkl1	487.333	chr7	52462894	52467253	-
Txndc8	486.944	chr4	57996900	58021996	-
H1fnt	483.866	chr15	98086412	98087738	-
Moap1	483.032	chr12	103978039	103981871	-
Efcab3	478.782	chr11	104953532	104978851	+
Bag5	475.452	chr12	112947703	112951467	-
Srsf7	475.162	chr17	80599419	80606645	-
1700018B24Rik	475.025	chr3	48409652	48413022	-
4930402H24Rik	474.659	chr2	130533588	130665846	-
Ccdc136	470.805	chr6	29348925	29376995	+
Gm3404	468.627	chr5	147337376	147340129	+
Actl7b	468.494	chr4	56752876	56754297	-
Srsf5	468.224	chr12	82046490	82051494	+
Eif4g2	467.297	chr7	118211498	118226544	-
2900010M23Rik	464.582	chr17	27259609	27270836	-
Safb2	461.306	chr17	56702364	56724006	-
Fam183b	461.033	chr11	58606303	58615462	-
Gm6460	457.446	chr5	11594955	11599480	+
Art3	456.698	chr5	92760866	92843653	+
Acrv1	455.514	chr9	36500804	36506422	+
BC051142	455.023	chr17	34535764	34597679	+
Catsper4	454.689	chr4	133767882	133783298	-
Ubb	453.976	chr11	62365005	62366714	+
Serf1	451.897	chr13	100877973	100884188	+
Yap1	450.197	chr9	7932000	8004596	-
Tfam	449.255	chr10	70688224	70700792	-
Paf1	448.489	chr7	29178014	29184402	+
Clip1	448.124	chr5	124029078	124134300	-
Ccdc104	447.979	chr11	29121535	29147272	-
2610318N02Rik	447.75	chr16	17113490	17125199	-
Stard6	445.783	chr18	70632198	70660717	+
Ppm1a	445.416	chr12	73862197	73895927	+
Gm3402	445.241	chr5	147325698	147328478	+
Dnaja4	445.076	chr9	54547365	54564124	+
Fyttd1	444.305	chr16	32877869	32909049	+
Gtsf1	443.879	chr15	103232889	103260858	-
Kif2b	443.877	chr11	91436599	91438869	-
Cypt1	443.128	chrX	16099997	16100815	+
1700011L22Rik	441.974	chr8	81734328	81772482	-
Gm5142	440.067	chr14	59777339	59797586	-
4921510H08Rik	436.497	chr10	97155692	97157560	+
Zdbf2	434.421	chr1	63319842	63361149	+
Azin1	433.149	chr15	38417184	38449021	-
Ift80	432.615	chr3	68696420	68808492	-
2010107E04Rik	427.655	chr12	113199586	113205188	-
Iqce	427.279	chr5	141139458	141178332	-
Usp48	426.403	chr4	137150103	137214452	+
Gtf2b	426.191	chr3	142428210	142446569	+
Cst13	425.634	chr2	148645834	148656146	+
Fam54b	424.025	chr4	134081477	134088667	-
Csda	423.817	chr6	131314875	131338468	-
Ccni	423.253	chr5	93610958	93635521	-
Gm9839	422.928	chr1	32576407	32577844	-
Gm3415	422.412	chr5	147367688	147370491	+
Zfand3	421.738	chr17	30142031	30346965	+
4930444G20Rik	421.371	chr10	21786114	21787885	-
Btbd10	420.245	chr7	120459157	120512853	-
Capza3	419.931	chr6	139990045	139991307	+
Mtx1	418.654	chr3	89013002	89018257	-
Lyzl1	417.546	chr18	4165829	4182234	+
Atpaf2	417.442	chr11	60214125	60230601	-
1700010M22Rik	413.943	chr2	144649401	144650151	+
Efcab10	413.798	chr12	34079718	34086134	+
Prkar1a	412.517	chr11	109512262	109530962	+
Gapdhs	412.438	chr7	31514905	31524375	-
Znrd1	412.334	chr17	37091302	37095373	-
Atpif1	412.284	chr4	132086469	132089574	-
Creb3l4	411.766	chr3	90041421	90047434	-
Stard10	410.253	chr7	108469832	108494826	+
Arrdc5	409.858	chr17	56433533	56439709	-
Fam154b	408.175	chr7	89781469	89797038	-
Adam3	405.547	chr8	25787705	25836297	-
1700037C18Rik	405.491	chr16	3905797	3908689	-
1700020N01Rik	405.247	chr10	21312950	21342181	+
Gm6370	404.577	chr5	147302938	147305708	+
Zfp451	403.475	chr1	33818597	33871272	-
Ddx20	403.354	chr3	105481379	105490489	-
Sh3glb1	399.696	chr3	144351807	144383287	-
Trim59	398.436	chr3	68839215	68848664	-
Rfpl3s	398.111	chr9	55810395	55828739	-
4930503B20Rik	397.29	chr3	146309222	146314281	-
Tsks	395.883	chr7	52198609	52213405	+
Reep6	394.742	chr10	79792889	79799186	+
Ift122	394.561	chr6	115803545	115876717	+
Hat1	394.464	chr2	71227316	71279679	+
4932414N04Rik	392.115	chr2	68495940	68586522	+
4930451I11Rik	389.518	chr7	133973987	133975010	-
Atp1a4	388.534	chr1	174153638	174188555	-
Gsk3b	387.996	chr16	38089086	38246165	+
Gramd1b	387.458	chr9	40105491	40263349	-
1700012B09Rik	387.343	chr9	14562637	14575474	-
1700019N19Rik	386.484	chr19	58860292	58868904	-
1700029F09Rik	386.206	chr1	44143461	44159233	-
Obfc2a	385.838	chr1	51526331	51535243	-
6330416G13Rik	384.485	chr4	63221393	63247387	+
Lnp	383.93	chr2	74352893	74417005	-
Nme5	383.745	chr18	34722294	34738760	-
Tomm22	383.06	chr15	79501297	79503292	+
Ssx2ip	382.98	chr3	146067605	146103101	+
Polr1c	377.725	chr17	46380868	46384994	-
Rps9	376.551	chr7	3655642	3658499	+
Pdzk1ip1	375.292	chr4	114761312	114766499	+
1700003M02Rik	375.186	chr4	34658580	34677455	-
Ube2k	372.855	chr5	65928499	65990228	+
Ropn1l	372.005	chr15	31370964	31383444	-
1700074P13Rik	371.383	chr6	40870458	40890556	-
Fam71f2	371.312	chr6	29231140	29240676	+
Ccnl1	370.934	chr3	65750072	65762147	-
Gm3409	370.487	chr5	147349223	147352003	+
Commd3	370.294	chr2	18594088	18597843	+
4922501L14Rik	369.677	chr3	154374096	154411976	+
A330021E22Rik	369.466	chr5	5580981	5664232	-
Psmb4	368.189	chr3	94688245	94690880	-
Pmpcb	366.557	chr5	21242977	21262970	+
Plac8l1	366.342	chr18	42338328	42356363	-
1700034E13Rik	366.18	chr18	52805873	52823385	+
Tmx2	363.388	chr2	84511473	84518204	-
Cdc42ep3	361.349	chr17	79733364	79754431	-
1700001P01Rik	359.725	chr11	97632794	97637232	-
Hnrnpd	357.619	chr5	100384954	100407957	-
Spaca7	356.898	chr8	12573048	12600738	+
Thrap3	355.996	chr4	125841326	125879954	-
H2afb1	355.616	chr2	17918048	17918573	-
Lrrc46	354.758	chr11	96895915	96902683	-
Ubc	354.083	chr5	125866334	125870387	-
AF366264	353.965	chr8	13835230	13838089	-
Ccdc92	352.614	chr5	125314801	125342591	-
Glul	351.693	chr1	155747074	155756844	+
Spink2	349.605	chr5	77634132	77640478	-
Atxn2	349.091	chr5	122161617	122264959	+
Mycbpap	348.788	chr11	94362660	94382816	-
Cul3	348.709	chr1	80263392	80337005	-
Pabpn1	347.851	chr14	55512979	55517764	+
Ifrd1	345.703	chr12	40929715	40949776	-
Cyb5d2	344.501	chr11	72590733	72609341	-
Gm6455	343.904	chr5	10865028	10870808	+
Fam76a	342.657	chr4	132455127	132478466	-
Vmp1	341.97	chr11	86397366	86497324	-
Sdccag3	341.318	chr2	26238319	26244836	-
Fmn1	341.144	chr2	113167892	113556924	+
1700019M22Rik	340.803	chr12	97284828	97285432	-
Atp6v1f	340.132	chr6	29417782	29420509	+
1110049F12Rik	340.062	chr4	135531516	135543159	-
Mtdh	339.868	chr15	34012473	34072140	+
Actrt2	339.192	chr4	154040536	154041976	-
Zfp618	338.847	chr4	62626607	62795064	+
Rbm39	338.844	chr2	155972974	156005976	-
Tmem53	336.41	chr4	116924593	116941185	+
Nfatc2ip	336.285	chr7	133526367	133540251	-
Cd320	336.279	chr17	33980035	33986719	+
Spata9	335.986	chr13	76105186	76136416	+
Aff4	335.834	chr11	53164268	53235332	+
Stat4	335.538	chr1	52065087	52164028	+
Enkur	334.794	chr2	21102357	21126992	-
Pcca	334.604	chr14	122933549	123289166	+
Ttll4	334.382	chr1	74708327	74744547	+
Tbc1d21	334.087	chr9	58207610	58218176	-
Elof1	333.604	chr9	21917432	21918613	-
Tssk2	331.878	chr16	17898729	17900117	+
Akap3	328.767	chr6	126803115	126824326	+
Dynll1	328.66	chr5	115747118	115750999	-
Chrne	328.528	chr11	70428384	70432696	-
Ggnbp2	328.465	chr11	84645862	84684240	-
Cdrt4	327.796	chr11	62764694	62806597	+
Gfpt1	327.398	chr6	86992839	87042201	+
Gnpat	327.386	chr8	127386932	127413957	+
Ctdp1	326.802	chr18	80604697	80666406	-
Cage1	325.751	chr13	38097920	38128806	-
Swi5	325.612	chr2	32134335	32143588	-
Spata4	323.867	chr8	55686133	55695451	+
Fam71f1	323.166	chr6	29269139	29286022	+
Pfdn5	323.137	chr15	102156546	102161920	+
Cox6c	322.67	chr15	35861730	35868001	-
Tekt2	322.19	chr4	125999364	126002443	-
1700020L24Rik	321.867	chr11	83251195	83254734	+
1810020D17Rik	321.544	chr7	104698840	104728007	-
Speer1-ps1	320.44	chr5	11340407	11346273	+
N4bp2l2	320.209	chr5	151438547	151468187	-
Ddt	319.013	chr10	75233977	75236119	-
4930544O15Rik	318.89	chr4	115452438	115453639	-
Pan3	317.913	chr5	148242155	148360077	+
Oraov1	316.806	chr7	152101098	152107042	+
Usp15	316.533	chr10	122550299	122633979	-
4931417G12Rik	315.904	chr6	113546755	113550709	-
Sec24b	315.831	chr3	129686102	129763825	-
Ppm1g	315.648	chr5	31505040	31522918	-
1700042G07Rik	315.003	chr4	115845976	115846902	+
Actg2	314.492	chr6	83462902	83486245	-
3230401D17Rik	314.458	chr2	163231557	163245206	-
Vmn2r7	314.056	chr3	64494581	64523524	-
Smc4	313.835	chr3	68808893	68838545	+
Akap9	313.698	chr5	3928185	4080204	+
Ppm1d	313.555	chr11	85124755	85160573	+
Rimklb	313.441	chr6	122403626	122436323	-
Trim24	313.247	chr6	37820810	37916289	+
Suclg1	313.066	chr6	73198498	73226901	+
Ube2j1	312.797	chr4	33118399	33139339	+
Dbn1	312.685	chr13	55574788	55589437	-
Ndufaf2	312.308	chr13	108842782	108948819	-
Mtmr12	311.39	chr15	12134848	12201995	+
Fgfr1op	310.985	chr17	8358382	8389335	+
Cep350	310.978	chr1	157692093	157820385	-
Nudt3	310.796	chr17	27716335	27760397	-
Ttll13	310.12	chr7	87391261	87405707	+
Tipin	310.081	chr9	64129413	64152599	+
Ccdc81	309.955	chr7	97014657	97052139	-
Tax1bp1	309.787	chr6	52663722	52716773	+
Asns	309.778	chr6	7625170	7643182	-
Lrp2bp	309.755	chr8	47095955	47114830	+
Mrps18b	308.477	chr17	36047329	36053314	-
Cylc2	306.888	chr4	51229549	51242800	+
4930578I06Rik	306.381	chr14	64589958	64606617	-
Ndufc1	306.296	chr3	51209400	51212877	-
Chd4	305.874	chr6	125046180	125080519	+
Znrd1as	305.336	chr17	37095536	37102568	+
Stx2	305.237	chr5	129490435	129514439	-
Kif17	305.084	chr4	137818165	137857888	+
Wasf2	305.071	chr4	132686547	132754245	+
1700057K13Rik	303.772	chr1	159029278	159038776	-
Gm904	303.705	chr13	50738596	50741207	+
1700009N14Rik	303.139	chr4	39397325	39398811	+
1700015E13Rik	303.061	chr1	172238991	172242256	+
Chchd3	301.921	chr6	32742226	33010152	-
Ccdc40	301.783	chr11	119089885	119126526	+
0610010O12Rik	301.132	chr18	36508277	36553024	+
Gtf2i	300.894	chr5	134713703	134790616	-
Mff	300.475	chr1	82721492	82748964	+
Srgn	299.812	chr10	61957175	61970503	-
Fos	299.712	chr12	86814850	86818219	+
Setx	299.351	chr2	28980511	29037991	+
Fgfr1op2	299.22	chr6	146526432	146547720	+
Tnni3	299.035	chr7	4469909	4474045	-
Arl1	299	chr10	88194158	88205947	+
Ufd1l	298.683	chr16	18812386	18835354	+
Cutc	298.308	chr19	43827512	43843128	+
Psmf1	297.877	chr2	151541797	151567029	-
Rps21	297.326	chr2	179992083	179993149	+
Strap	297.229	chr6	137683602	137700451	+
4930505A04Rik	295.95	chr11	30326005	30371829	-
Dnajb13	295.631	chr7	107651528	107663324	-
Spata7	295.238	chr12	99866393	99908024	+
Bbx	295.236	chr16	50191956	50432502	-
Rcc1	295.116	chr4	131887833	131901665	-
1700110M21Rik	293.209	chr14	101596906	101599286	-
Klhl10	293	chr11	100303237	100318338	+
Gm10220	291.695	chr5	26441303	26447965	-
Eri3	291.162	chr4	117223098	117346886	+
Tprn	291.108	chr2	25118117	25125406	+
5031410I06Rik	290.917	chr5	26425207	26431854	-
Slc2a3	290.812	chr6	122677826	122692763	-
1700054O13Rik	290.732	chrX	9424072	9424626	+
Cse1l	289.922	chr2	166731595	166771889	+
Ccdc150	288.99	chr1	54307526	54425571	+
Sh3rf2	288.802	chr18	42213363	42318349	+
Qrich2	287.749	chr11	116302638	116315661	-
Mkln1	287.257	chr6	31348827	31459477	+
Lyzl6	286.623	chr11	103492388	103500188	-
Pgk2	285.764	chr17	40343962	40345554	-
Golga2	283.942	chr2	32143772	32163441	+
Ccdc37	283.604	chr6	90353729	90378474	-
1700018F24Rik	283.478	chr5	145803858	145806547	+
A730037C10Rik	283.253	chr3	54943959	54976857	+
1700015F17Rik	282.625	chr5	5437826	5479143	-
Bmi1	282.437	chr2	18598644	18608256	+
4933421I07Rik	282.317	chr7	49700831	49703450	-
Eef1a1	281.692	chr9	78326260	78329531	-
Arpc1a	281.301	chr5	145844737	145869625	+
H3f3b	281.294	chr11	115883274	115885818	-
Myst2	281.2	chr11	95133166	95171560	-
Rnf151	281.007	chr17	24852784	24855002	-
Zfp106	280.772	chr2	120332565	120389567	-
Glod4	280.434	chr11	76033896	76057201	-
Gm13547	279.962	chr2	29617047	29619609	+
Gtf2f1	279.902	chr17	57142824	57150711	-
Aars	279.79	chr8	113557866	113580770	+
4931407G18Rik	279.525	chr5	88408475	88410566	+
Paip2b	279.273	chr6	83756052	83781735	-
Herpud1	278.738	chr8	96910399	96919258	+
Paip2	278.617	chr18	35758320	35776839	+
1700113H08Rik	278.549	chr10	86520790	86693344	+
4933427G17Rik	278.505	chr7	128126022	128158301	+
Ptdss2	278.344	chr7	148317184	148342053	+
Ccdc70	278.257	chr8	23081067	23084513	+
Sap30bp	278.201	chr11	115794972	115826848	+
Col22a1	277.429	chr15	71628905	71864657	-
Clk2	277.424	chr3	88968726	88981009	+
Adad1	277.329	chr3	36962577	37010434	+
Mrpl22	277.059	chr11	57985155	57993082	+
Mrps12	276.739	chr7	29524659	29526800	-
BC061194	276.717	chr2	18620648	18671232	+
Mael	276.431	chr1	168131515	168168875	-
Entpd1	275.974	chr19	40734283	40816092	+
BC048671	275.578	chr6	90251263	90255442	+
Adcy10	275.299	chr1	167415313	167506904	+
Pcbp3	274.984	chr10	76224598	76424692	-
Bcl2l14	274.812	chr6	134346346	134388742	+
Myo5b	272.573	chr18	74602272	74931131	+
Ipo5	272.535	chr14	121310415	121347266	+
Hsp90ab1	272.439	chr17	45704726	45710210	-
A430005L14Rik	272.382	chr4	153331345	153336033	+
4930467E23Rik	272.214	chr8	19729575	19753602	+
Stk36	271.995	chr1	74648028	74683467	+
Morn5	271.862	chr2	35904992	35935229	+
4921530D09Rik	271.666	chr2	25464148	25473198	-
Hnrnpab	271.504	chr11	51413601	51420383	-
Tnfaip2	271.226	chr12	112680871	112693229	+
Zc3h18	270.694	chr8	124900515	124941260	+
1700013G24Rik	270.618	chr4	137009210	137011376	+
Hrasls5	269.345	chr19	7687058	7713728	+
Ccdc54	269.072	chr16	50589971	50591267	-
Tppp2	268.077	chr14	52538435	52540375	+
Hspa5	267.79	chr2	34627609	34632049	+
Pdha2	267.714	chr3	140872967	140875319	-
Hirip3	267.321	chr7	134005485	134008636	+
Fam71b	267.033	chr11	46218231	46221484	+
Hspa4	266.781	chr11	53073315	53113981	-
1700023E05Rik	266.495	chr5	77445047	77490547	+
4-Sep	265.661	chr11	87394632	87404041	+
BC049762	265.606	chr11	51067152	51076453	-
Mras	265.152	chr9	99285838	99337131	-
Ttll10	265.065	chr4	155408945	155424926	-
Ankrd7	264.892	chr6	18816317	18829584	+
Ankrd42	264.274	chr7	99732692	99785652	-
Abcf3	264.224	chr16	20548675	20561676	+
Cypt3	263.927	chrX	149993135	149993972	+
1700125H20Rik	262.683	chr11	84984597	84994656	+
Ccdc67	262.599	chr9	15364307	15432377	-
BC055111	262.294	chr4	106263513	106289843	-
4933427D14Rik	261.304	chr11	71967598	72016873	-
1700013F07Rik	261.133	chr3	108340501	108347615	+
Tspan6	260.579	chrX	130425608	130432968	-
Zbbx	260.308	chr3	74841828	74947645	-
1700052N19Rik	260.228	chr10	5891400	5913936	-
Plin2	260.049	chr4	86302468	86315963	-
4933433C11Rik	259.849	chr2	25068078	25070150	-
Gm10471	259.802	chr5	26408711	26415804	-
Pik3ip1	259.05	chr11	3230733	3242974	+
4930571K23Rik	258.967	chr7	132512374	132514527	+
Pdhb	258.548	chr14	8998504	9005506	-
Mas1	258.125	chr17	13033870	13061009	-
Actb	258.011	chr5	143664794	143668403	-
Lypla1	257.85	chr1	4797973	4836816	+
Amfr	257.534	chr8	96495487	96536540	-
Hn1	257.447	chr11	115358666	115375684	-
Laptm4a	257.113	chr12	8928112	8945547	+
Zcchc7	256.543	chr4	44769430	44945086	+
4930415O20Rik	256.335	chr15	98401434	98420019	+
Nt5c1b	256.215	chr12	10376776	10396980	+
Limch1	255.693	chr5	67137078	67448398	+
Mdm2	255.449	chr10	117125960	117147772	-
Brp44	254.639	chr1	167391338	167411345	+
Ccdc163	254.624	chr4	116381534	116387709	+
Dus2l	254.303	chr8	108535406	108577719	+
Rnf141	254.248	chr7	117960048	117987895	-
Lpcat3	254.19	chr6	124613121	124654734	+
Axin1	254.019	chr17	26275630	26332756	+
Wapal	253.557	chr14	35487113	35559403	+
1700017N19Rik	252.493	chr10	100055019	100081025	+
1110004E09Rik	251.724	chr16	90926055	90935094	-
1700027D21Rik	251.487	chr10	76025016	76032945	+
Ndrg3	251.463	chr2	156753077	156817847	-
Iqcf5	251.286	chr9	106416903	106418334	+
Arl13b	250.09	chr16	62793514	62846866	-
Ddx4	249.912	chr13	113388540	113442518	-
Spata20	249.367	chr11	94340217	94346624	-
AA467197	248.676	chr2	122463622	122466812	+
Csnk1d	248.417	chr11	120823054	120852647	-
Tpx2	248.149	chr2	152673699	152721057	+
Cstl1	247.898	chr2	148576096	148581114	+
Hsfy2	247.581	chr1	56692892	56694295	-
Chek1	247.564	chr9	36516066	36534243	-
Klhdc3	247.529	chr17	46811499	46817879	-
Gm4871	247.492	chr5	145790468	145793633	-
Strbp	247.49	chr2	37425387	37502805	-
Trim37	247.304	chr11	86940578	87034184	+
Fam71e2	247.148	chr7	4704828	4722872	-
Klhl11	246.98	chr11	100323925	100334096	-
Rpl39l	246.726	chr16	10170320	10175004	+
Rps15a	246.596	chr7	125247889	125259661	-
Ndufaf3	246.277	chr9	108468195	108469673	-
Pold3	245.338	chr7	107230622	107270010	-
Cript	245.238	chr17	87424900	87435148	+
Cox7b2	245.07	chr5	71834061	71939444	-
Ccdc55	244.999	chr11	76857793	76891937	-
1700018C11Rik	244.948	chr4	63268124	63283463	-
4930526D03Rik	244.658	chr2	181431499	181433147	-
Pla2g10	244.171	chr16	13715154	13730678	-
Gm5114	244.161	chr7	46662663	46668530	-
Tekt1	243.92	chr11	72158221	72175382	-
Ndufv2	243.401	chr17	66428134	66450831	-
Jup	243.102	chr11	100230169	100259104	-
Stambpl1	243.069	chr19	34266759	34314818	+
Tuba3a	242.831	chr6	125228291	125236060	-
Rsph3b	242.828	chr17	7109064	7152705	-
Dgcr2	242.408	chr16	17840450	17891821	-
Npepps	242.305	chr11	97067170	97141890	-
Bbs7	242.055	chr3	36472064	36512311	-
Scgn	242.044	chr13	24045325	24083083	-
4930407I10Rik	241.999	chr15	81889580	81896968	+
4930579C15Rik	241.944	chr4	94573983	94595501	-
Uqcrh	241.856	chr4	115739569	115747675	-
Ttll5	241.601	chr12	87165899	87394710	+
Serf2	241.275	chr2	121274963	121279162	+
1700010I14Rik	240.61	chr17	9181197	9201184	+
1700016C15Rik	239.965	chr1	179659944	179683436	+
Larp7	239.699	chr3	127239631	127256267	-
Tmem184c	239.544	chr8	80119878	80134552	-
Tmem232	239.12	chr17	65605344	65890122	-
Actl6a	239.097	chr3	32607467	32625893	+
BC088983	239.063	chr8	59010318	59029363	-
Actl7a	238.989	chr4	56756293	56757797	+
Gykl1	238.762	chr18	52853332	52855247	+
Ncoa2	238.7	chr1	13129239	13364164	-
Ppp1r2	238.245	chr16	31251626	31275363	-
Prss37	237.972	chr6	40464822	40469507	-
Gm5415	237.967	chr1	32600390	32604138	-
Mbd3l1	237.635	chr9	18282838	18289736	+
Irgc1	237.194	chr7	25216944	25230701	-
Cast	237.175	chr13	74831733	74945369	-
1700040L02Rik	237.108	chr10	67893703	68004623	-
Vprbp	236.949	chr9	106724306	106783323	+
Gbf1	236.769	chr19	46227047	46361000	+
Pgam2	236.452	chr11	5701639	5703799	-
Lypd4	236.391	chr7	25649638	25654710	-
Gm5591	233.815	chr7	39303157	39313212	-
Rnf7	233.479	chr9	96371375	96379014	-
Spata18	233.278	chr5	74042618	74070723	+
Rnf19b	233.264	chr4	128735514	128761770	+
Gm6588	233.007	chr5	112878445	112880758	+
Atp1b3	232.311	chr9	96233094	96264718	-
Ptpn4	231.82	chr1	121554669	121733648	-
Ppig	231.79	chr2	69561144	69592116	+
BC049635	231.623	chr4	42880874	42887075	-
Adam32	231.614	chr8	25946614	26059276	-
Zscan2	231.323	chr7	88006993	88021399	+
Tmbim4	231.027	chr10	119645881	119661953	+
Cytl1	230.235	chr5	38126757	38131059	+
Fam71d	230.082	chr12	79792521	79835506	+
1700026J04Rik	228.782	chr13	35001832	35011861	-
Ahctf1	228.637	chr1	181675034	181734146	-
Nsmce1	228.632	chr7	132611153	132635056	-
Cspp1	228.253	chr1	10028298	10126849	+
Cox7c	228.252	chr13	86184402	86186400	-
BC051628	227.746	chr2	180954720	180957556	+
2210012G02Rik	227.042	chr4	106806766	106850971	-
Msl1	226.664	chr11	98657082	98669173	+
Trappc2l	226.286	chr8	125135525	125139491	+
Cpeb4	225.779	chr11	31772210	31831577	+
2410022L05Rik	225.587	chr8	13884787	13890271	-
Slbp	225.561	chr5	33982710	33994955	-
Asap1	225.468	chr15	63920100	64214481	-
Rnf133	225.343	chr6	23598868	23600305	-
Tex261	225.333	chr6	83720407	83725806	-
St7	225.28	chr6	17699215	17893022	+
Lyar	225.073	chr5	38611720	38625545	+
Ttc24	225.009	chr3	87873331	87882226	-
Fsip1	224.756	chr2	118030623	118082702	-
Fto	224.692	chr8	93837423	94192332	+
Ribc2	224.548	chr15	84962528	84974999	+
Prss51	224.372	chr14	64712532	64716509	+
Cmtm2b	224.309	chr8	106846136	106854656	+
Taf13	224.225	chr3	108374616	108384986	+
Ckap5	224.071	chr2	91386478	91460822	+
Plcz1	223.205	chr6	139938242	139989938	-
1700010B08Rik	223.005	chr2	173544915	173547587	+
Tpt1	222.799	chr14	76245062	76248110	+
Zfp597	222.732	chr16	3861543	3872374	-
Cetn4	222.399	chr3	37207548	37211368	-
Catsper3	221.879	chr13	55885939	55910361	+
Pdilt	221.877	chr7	126630100	126666996	-
Tceb1	221.692	chr1	16632845	16646946	-
1700037H04Rik	221.683	chr2	130972060	130985756	-
Bach2	221.642	chr4	32504409	32673083	+
Gtpbp2	221.077	chr17	46297980	46306319	+
Tpr	220.977	chr1	152239967	152297065	+
Izumo3	220.743	chr4	91811008	91813912	-
1200016B10Rik	220.733	chr1	153214828	153275565	-
Ndufb10	220.626	chr17	24859011	24861333	-
Fuca1	220.443	chr4	135476640	135496215	+
Clk3	220.158	chr9	57598517	57613667	-
Sclt1	220.148	chr3	41430626	41546436	-
Nupl2	219.987	chr5	23670780	23689826	+
Best1	219.856	chr19	10059661	10076123	-
Srp14	219.277	chr2	118301578	118305432	-
Hells	218.911	chr19	39005479	39042767	+
Hnrnpu	218.683	chr1	180258430	180267915	-
Gkap1	218.557	chr13	58334711	58375549	-
Gm1527	218.336	chr3	28791538	28825646	+
Dscc1	218.17	chr15	54907655	54922033	-
Ubxn11	218.139	chr4	133658497	133682695	+
Psmc3ip	218.136	chr11	100953454	100956749	-
Brms1	216.794	chr19	5041403	5049917	+
1700026D08Rik	216.758	chr7	90924126	90943349	-
Senp6	216.645	chr9	79914709	79992587	+
1500032L24Rik	216.458	chr15	82176475	82179492	+
Psmg2	216.37	chr18	67801252	67813816	+
Ubr4	216.211	chr4	138936573	139045447	+
Clk1	216.118	chr1	58468831	58480932	-
Pgap2	216.041	chr7	109371587	109386265	+
Cyp51	215.908	chr5	4080673	4104697	-
1700012A03Rik	215.703	chr6	32000287	32008915	+
Mapre3	215.466	chr5	31117128	31168479	+
Zfp58	215.154	chr13	67591102	67601458	-
Slc16a7	215.001	chr10	124664540	124765591	-
Osbp2	214.96	chr11	3603733	3763906	-
Upf3a	214.626	chr8	13785614	13798537	+
Pomgnt1	214.469	chr4	115823122	115832449	+
Gstm1	214.337	chr3	107815167	107820891	-
Hnrnpc	214.285	chr14	52693054	52723703	-
1700067P10Rik	214.095	chr17	48226581	48227870	+
Gm5800	213.976	chr14	52331318	52336807	-
Bud31	213.959	chr5	145901265	145908943	+
1700018B08Rik	213.856	chr8	124054683	124065854	-
Fam126b	213.611	chr1	58579649	58643177	-
Tssk1	213.432	chr16	17894295	17895746	+
Wdr47	213.391	chr3	108394195	108448637	+
Wdr52	213.385	chr16	44394911	44482541	+
Morn1	213.152	chr4	154460685	154519616	+
1700001L19Rik	212.858	chr13	68736315	68753108	+
Micalcl	212.504	chr7	119511821	119556618	+
Fam78a	212.435	chr2	31922404	31939225	-
B230118H07Rik	212.331	chr2	101400937	101469143	-
Creld2	212.284	chr15	88650075	88657111	+
Rab11a	212.226	chr9	64563106	64585563	-
Zfp87	212.032	chr13	67616717	67627167	-
Amotl1	211.928	chr9	14346410	14419444	-
Psmc2	211.593	chr5	21291100	21309602	+
Phf7	211.508	chr14	32050881	32064404	-
4933422H20Rik	211.461	chr11	115301858	115309582	+
Mdm1	210.886	chr10	117578842	117606055	+
9530068E07Rik	210.628	chr11	52209929	52222225	+
Usp25	210.585	chr16	77014313	77117025	+
Tmem81	210.215	chr1	134402806	134405216	+
Ubqln3	210.157	chr7	111289136	111291786	-
Rangap1	209.969	chr15	81534677	81560349	-
Wbp11	209.873	chr6	136762174	136776737	-
Katnal1	209.819	chr5	149683159	149740223	-
Ift57	209.772	chr16	49699406	49765239	+
Stc1	209.616	chr14	69647345	69659458	+
Ccdc28a	209.574	chr10	17933490	17954787	-
Pmfbp1	209.451	chr8	112017926	112066542	+
Gm15319	209.402	chr8	19933241	19958780	-
Speer4a	209.17	chr5	26360809	26366045	-
Dmrtb1	209.167	chr4	107348894	107356767	-
Acr	209.155	chr15	89398756	89405016	+
Defb30	209.005	chr14	63652923	63656683	-
Proca1	208.968	chr11	78006893	78019265	+
Cdkn2aip	208.959	chr8	48794697	48799285	-
Fam71e1	208.912	chr7	51751957	51756504	+
4930479M11Rik	208.667	chr7	31455740	31456624	-
2700050L05Rik	208.601	chr7	140829357	140864700	+
Ccdc50	208.463	chr16	27389062	27452304	+
Tmem107	208.012	chr11	68884310	68886795	+
Aldoart2	207.519	chr12	56666121	56667696	+
1700016K19Rik	207.321	chr11	75813413	75817071	+
Cluap1	207.203	chr16	3909008	3941147	+
Bag1	207.119	chr4	40883430	40895327	-
Tuba3b	206.996	chr6	145564482	145569997	+
Chic2	206.827	chr5	75402448	75440651	-
Impdh2	206.699	chr9	108462831	108467897	+
Mapk8	206.678	chr14	34191083	34260344	-
4930404H21Rik	206.426	chr7	140778706	140793798	-
Dcst1	206.27	chr3	89154156	89169161	-
1700019N12Rik	206.15	chr19	6996915	6999870	-
Mesdc2	206.069	chr7	91040509	91050042	+
Pigk	206.013	chr3	152377063	152451977	+
Rrp1	205.669	chr10	77863106	77875788	-
Olfr112	205.56	chr17	37700183	37706396	-
Cgrrf1	204.601	chr14	47451918	47473865	+
Mfsd11	204.459	chr11	116715328	116736951	+
2610015P09Rik	204.262	chr16	43890014	43964427	+
Gcfc1	204.062	chr16	91014281	91044624	-
Aurka	203.916	chr2	172181695	172196006	-
Nedd8	203.711	chr14	56281103	56290743	-
Fhl4	203.546	chr10	84559763	84565240	-
Tmod1	203.197	chr4	46052093	46128904	+
Prss52	202.867	chr14	64723159	64732588	+
Naa20	202.802	chr2	145728976	145742161	+
2410001C21Rik	202.763	chr2	172266077	172295399	+
2310003C23Rik	202.636	chr2	180447250	180453222	+
Fam154a	202.402	chr4	86090601	86204207	-
Usp7	202.376	chr16	8688814	8738435	-
Tbp	202.338	chr17	15636851	15654391	+
Ankrd37	202.304	chr8	47082261	47085204	-
1700021F07Rik	202.043	chr2	173348092	173354003	+
Cul1	201.886	chr6	47404322	47476138	+
Zfp263	201.864	chr16	3744098	3750788	+
Gnb1	201.803	chr4	154865469	154933378	+
Tuba8	201.579	chr6	121160787	121176115	+
Spata21	201.382	chr4	140644259	140668674	+
Sec22a	201.375	chr16	35311216	35364004	-
Gm4884	201.335	chr7	48288088	48300672	+
4930415F15Rik	201.162	chr11	11389268	11415193	+
Med28	201.033	chr5	45911467	45920523	+
Prss46	200.831	chr9	110747009	110759026	+
Zranb1	200.789	chr7	140141304	140175634	+
Mgea5	200.622	chr19	45824748	45857781	-
Usp1	200.224	chr4	98590500	98602224	+
Zfp330	199.758	chr8	85287518	85298025	-
Syngr4	199.654	chr7	53142214	53152081	-
1700029J07Rik	198.881	chr8	47038959	47060606	-
4933409G03Rik	198.869	chr2	68420469	68454520	+
Lrrc8b	198.615	chr5	105844793	105915208	+
Psme4	198.504	chr11	30671774	30780361	+
Klk1b7-ps	198.439	chr7	51200381	51201297	+
Gatad2b	197.97	chr3	90145575	90162042	+
Ppme1	197.928	chr7	107475246	107520406	-
Naa35	197.724	chr13	59686693	59736142	+
Zfp664	197.573	chr5	125343074	125369000	+
Prpf31	197.55	chr7	3581586	3594086	+
Ube4b	197.192	chr4	148702524	148800740	-
Dusp10	197.059	chr1	185858339	185899515	+
1110051M20Rik	196.981	chr2	91117984	91284799	-
Eif4g1	196.876	chr16	20672821	20692956	+
Faf2	196.731	chr13	54723144	54765424	+
Catsper1	196.654	chr19	5335740	5344153	+
Zfp184	196.614	chr13	22036962	22052354	+
1700013D24Rik	196.076	chr6	124297611	124307104	-
Pebp1	195.546	chr5	117732659	117737573	-
Dctn3	194.981	chr4	41661829	41670195	-
Agpat3	194.812	chr10	77734307	77814445	-
Bpgm	194.786	chr6	34426355	34455610	+
Alkbh3	194.464	chr2	93820790	93850887	-
Cnbp	194.399	chr6	87792608	87801100	-
Atp5h	194.395	chr11	115277010	115281233	-
Eif1a	194.394	chr18	46757357	46769879	+
Serinc3	194.206	chr2	163449008	163470879	-
Camk4	194.155	chr18	33098694	33355421	+
Kctd20	193.851	chr17	29090160	29104882	+
Fbxw5	193.778	chr2	25356297	25360990	+
Eif4g3	193.737	chr4	137549384	137762386	+
4933432B09Rik	193.713	chr15	79440005	79489386	-
Tex2	193.636	chr11	106363452	106474244	-
Tmem191c	193.434	chr16	17276392	17278754	+
Nfkbib	193.387	chr7	29543269	29551543	-
Tctn2	192.724	chr5	125048757	125077658	+
Cdr2	192.65	chr7	128100549	128125826	-
Ccr9	192.398	chr9	123676328	123692575	+
Ccnt1	192.333	chr15	98373641	98398067	-
Cap1	191.947	chr4	122536470	122563124	-
Sec61a2	191.484	chr2	5792032	5816399	-
1700086L19Rik	191.328	chr12	75385262	75396937	+
Cfl1	191.282	chr19	5490454	5494031	+
Rdbp	191.231	chr17	34987335	34993317	+
1700011F03Rik	191.198	chr6	70863082	70868916	-
Blzf1	190.994	chr1	166219930	166237615	-
1700102P08Rik	190.81	chr9	108295164	108300098	+
Aarsd1	190.715	chr11	101268153	101278747	-
Dnajc10	190.231	chr2	80155622	80194212	+
Syt11	190.209	chr3	88548622	88576521	-
Cacybp	190.204	chr1	162132497	162143023	-
Atp9b	190.005	chr18	80930879	81130797	-
Prdx4	189.906	chrX	151758462	151772997	-
Fxr2	189.737	chr11	69446472	69466799	+
Ankrd36	189.722	chr11	5469686	5589340	+
Ncbp2	189.714	chr16	31948631	31958558	+
Ak8	189.411	chr2	28555680	28668685	+
Lsm4	189.139	chr8	73197129	73202651	+
Efhc1	188.869	chr1	20941706	20980922	+
4930548H24Rik	188.756	chr5	31788231	31790635	+
Atf1	188.485	chr15	100058289	100091679	+
Habp4	188.43	chr13	64263173	64287845	+
Ankrd45	188.06	chr1	163072842	163100638	+
Cachd1	187.893	chr4	100449283	100676353	+
Mrfap1	187.817	chr5	37186105	37187993	-
Bola3	187.719	chr6	83299477	83308386	+
Rps20	187.593	chr4	3761619	3762747	-
1110003E01Rik	187.503	chr5	65839993	65884074	-
4930430A15Rik	187.053	chr2	111033410	111069757	-
Dnajc9	186.993	chr14	21203859	21208132	-
1700057G04Rik	186.568	chr9	92204214	92252714	+
Ubxn6	186.511	chr17	56207676	56214412	-
Gk2	186.141	chr5	97884179	97886027	-
Ipo13	186.1	chr4	117567097	117587604	-
Synj2bp	185.926	chr12	82593180	82633894	-
Scamp1	185.848	chr13	94971387	95055236	-
Rogdi	185.618	chr16	5008821	5013646	-
Prss55	185.519	chr14	64694279	64704226	-
Pex12	185.476	chr11	83108146	83112479	-
1700001C02Rik	185.445	chr5	30768449	30786460	+
1700007K13Rik	185.077	chr2	28317520	28321844	-
Atp8b3	184.688	chr10	79982329	80001869	-
Rps17	184.653	chr7	88487618	88490120	-
Chchd1	184.65	chr14	21522248	21523647	+
BC017612	184.598	chr9	15309938	15349703	+
Nup98	184.416	chr7	109282716	109358634	-
Sec23ip	184.177	chr7	135888383	135928349	+
4930511I11Rik	184.155	chr17	28667805	28675920	+
Socs7	183.956	chr11	97223864	97259856	+
1700021C14Rik	183.897	chr3	88086681	88100760	-
Als2cr12	183.744	chr1	58714963	58752833	-
Lrrc50	183.706	chr8	122099134	122122354	+
Hsdl2	183.486	chr4	59594434	59631566	+
Rgl1	183.212	chr1	154364659	154472241	-
Sbf2	183.168	chr7	117451526	117758434	-
1700106J16Rik	182.946	chr11	88107544	88108763	+
Smg6	182.55	chr11	74739373	74977950	+
Ift74	182.281	chr4	94281210	94359924	+
C2cd3	182.087	chr7	107520742	107618668	+
Wdr26	181.565	chr1	183103356	183142109	-
C530008M17Rik	181.388	chr5	77269623	77302579	+
Letm2	181.177	chr8	26688961	26707959	-
Ccnl2	181.032	chr4	155186597	155198652	+
Trim17	180.652	chr11	58777282	58785231	+
BC048562	180.416	chr9	108338812	108348414	+
Gapvd1	179.756	chr2	34532501	34610752	-
Pdcl2	179.727	chr5	76741170	76760136	-
Tmem216	179.191	chr19	10624955	10630728	-
Ybx1	179.037	chr4	118949931	118967118	-
Insl6	178.809	chr19	29395843	29399808	-
Prpf38b	178.522	chr3	108705724	108714622	-
Neurl4	178.26	chr11	69715379	69727324	+
Actg1	177.733	chr11	120207003	120209798	-
H2afz	177.714	chr3	137527562	137529886	+
Ccdc27	177.699	chr4	153400752	153416786	-
Rpl41	177.437	chr10	127985165	127986224	-
Hmgcr	177.164	chr13	97418918	97440891	-
Stx18	177.129	chr5	38430473	38528057	+
Uqcrfs1	177.099	chr13	30632180	30637185	-
Stag3	176.964	chr5	138721736	138753621	+
Ciapin1	176.881	chr8	97343718	97362240	-
Cd46	176.778	chr1	196868093	196918442	-
Cct2	176.673	chr10	116488053	116500870	-
Pacrg	176.67	chr17	10595877	11033057	-
Lelp1	176.639	chr3	91938915	91946676	-
Zfp39	176.537	chr11	58701654	58717727	-
Luzp1	176.453	chr4	136025675	136105233	+
Slc22a15	176.445	chr3	101659693	101728376	-
Mfn1	176.218	chr3	32428403	32478147	+
Supt4h1	176.105	chr11	87551066	87557119	+
Rbm4b	175.992	chr19	4756524	4765940	+
Hsbp1	175.868	chr8	121868437	121872829	+
Eef1g	175.695	chr19	9041530	9052670	+
Muc4	175.612	chr16	32735971	32782476	+
Nfya	175.46	chr17	48526209	48549145	-
4930474N05Rik	174.933	chr14	36908150	36910041	+
Eif2ak2	174.85	chr17	79251889	79281912	-
Rsph3a	174.82	chr17	8138478	8172421	+
Cep63	174.802	chr9	102488907	102528454	-
Gpatch2	174.394	chr1	189039389	189175308	+
4921504E06Rik	174.315	chr2	19384463	19475537	-
Tekt5	174.306	chr16	10361346	10395541	-
Psme3	174.041	chr11	101177564	101184844	+
Rgs22	174.041	chr15	35939231	36070155	-
Fam170b	173.937	chr14	33647147	33649974	+
A630007B06Rik	173.77	chr19	56865452	56888173	-
Dnalc4	173.665	chr15	79591878	79604897	-
Mbtd1	173.524	chr11	93747532	93808298	+
Glipr1l1	173.275	chr10	111497244	111515566	+
Ndufs3	173.262	chr2	90734792	90744878	-
Tctex1d2	173.119	chr16	32419787	32428978	+
Ccdc65	172.952	chr15	98538657	98553764	+
Nup153	172.949	chr13	46775270	46823218	-
Pcyt2	172.751	chr11	120471400	120479204	-
Inpp1	172.294	chr1	52846263	52874532	-
Ccdc89	172.25	chr7	97574821	97577174	+
Tmem210	172.159	chr2	25143664	25144707	+
Cct8l1	172.157	chr5	25021884	25023845	+
Mkrn1	171.989	chr6	39347819	39370368	-
1700011I03Rik	171.652	chr18	57693479	57890719	+
Slfnl1	171.645	chr4	120204835	120209266	+
1700019A02Rik	171.626	chr1	53215420	53244461	-
Lrrc61	171.614	chr6	48504797	48520721	+
Prpf40a	171.529	chr2	52997508	53050221	-
Lmnb2	171.496	chr10	80364107	80380990	-
Sufu	171.221	chr19	46471407	46561150	+
Osbp	171.199	chr19	12040333	12068604	+
Larp1b	171.082	chr3	40754552	40781715	+
Ttc7	170.894	chr17	87682225	87781110	+
Morf4l1	170.82	chr9	89986506	90009658	-
Zbtb8os	170.777	chr4	129013269	129024273	+
Fam71a	170.344	chr1	192986462	192988696	-
Fhl5	170.067	chr4	25127055	25170023	-
Cldnd2	169.859	chr7	50696185	50698690	+
Kcne1	169.752	chr16	92346245	92359713	-
4931409K22Rik	169.732	chr5	24049251	24061287	-
Camsap1	169.664	chr2	25782357	25838802	-
Vps36	169.485	chr8	23303331	23329069	+
Rpl23	169.469	chr11	97638839	97643753	-
Tmsb4x	169.323	chrX	163645025	163647150	-
Pknox1	169.289	chr17	31701717	31744638	+
Prdm11	169.134	chr2	92815062	92886301	-
Atp5sl	169.008	chr7	26404511	26410569	+
Ccnk	168.881	chr12	109417947	109441569	+
Kdm4b	168.668	chr17	56465472	56542296	+
Glb1l	168.599	chr1	75194809	75207353	-
Rps6ka1	168.294	chr4	133403205	133443714	-
Atp6v1e2	168.244	chr17	87343448	87347227	-
Ppp1r16a	168.08	chr15	76502109	76525345	+
Fam162a	167.983	chr16	36043929	36071601	-
4922501C03Rik	167.763	chr9	87086797	87150367	-
Ghrl	167.75	chr6	113666112	113669874	-
Xrra1	167.742	chr7	107007727	107066334	+
Fank1	167.583	chr7	140968573	141073215	+
Smc3	167.301	chr19	53674885	53720321	+
4933411K20Rik	167.205	chr8	47254909	47280944	+
Lmbr1l	167.188	chr15	98734351	98748529	-
Tmeff1	167.129	chr4	48598064	48676003	+
Vwa5b1	167.043	chr4	138124883	138179907	-
Zp3r	166.782	chr1	132473282	132526183	-
Mprip	166.695	chr11	59475996	59594362	+
4930584F24Rik	166.597	chr5	26786609	26819854	-
Glcci1	166.505	chr6	8459595	8547548	+
Stk39	166.473	chr2	68048503	68310038	-
Leo1	166.401	chr9	75289330	75314239	+
Usp50	166.395	chr2	126586785	126609196	-
Cox7a2	166.297	chr9	79603047	79607660	-
Pitpna	166.214	chr11	75401609	75442280	+
Defb14	166.083	chr8	19194327	19195309	+
Dpf3	166.043	chr12	84370184	84828658	-
Upf2	165.889	chr2	5872514	5977749	+
Kdm2a	165.74	chr19	4316146	4397077	-
Nup160	165.629	chr2	90517371	90576485	+
Psma3	165.619	chr12	72075609	72095910	+
Atp5k	165.494	chr5	108862271	108863397	-
Ap2b1	165.482	chr11	83116198	83218535	+
Prdx5	165.381	chr19	6981308	6984135	-
Mmel1	164.961	chr4	154243693	154269639	+
Clgn	164.867	chr8	85913789	85950728	+
Apoh	164.558	chr11	108256610	108275710	+
Eif1	164.411	chr11	100181309	100183410	+
Btbd9	164.306	chr17	30352468	30713232	-
Med10	164.244	chr13	69948759	69954972	+
Chd2	164.091	chr7	80571537	80686632	-
1700029I15Rik	164.055	chr2	92223074	92223760	+
Cby1	163.994	chr15	79489656	79498090	+
Wnk1	163.989	chr6	119873986	119988673	-
Gm4787	163.683	chr12	82477977	82480473	-
Ppp1r32	163.57	chr19	10548746	10557387	-
1110004F10Rik	163.342	chr7	123236893	123248724	+
Fndc3a	163.151	chr14	72937759	73109810	-
Pde8a	163.024	chr7	88358689	88478508	+
Tekt3	162.958	chr11	62875160	62908462	+
Pdia3	162.853	chr2	121239637	121264422	+
Fbxl13	162.754	chr5	20989664	21151423	-
4922505E12Rik	162.716	chr1	184677256	184679311	-
Ccnyl1	162.622	chr1	64737918	64772216	+
Pppde2	162.597	chr15	81822952	81846570	-
Nrm	162.552	chr17	35998262	36002345	+
Oscp1	162.098	chr4	125735808	125766578	+
Ppid	161.733	chr3	79395310	79407572	+
Ulk4	161.597	chr9	120873571	121186290	-
Pfdn2	161.566	chr1	173275829	173288301	+
Dnajc15	161.547	chr14	78226023	78274724	-
Gm128	161.332	chr3	95040841	95045031	-
Kif2a	161.196	chr13	107750664	107812194	-
Rilpl2	160.752	chr5	124913273	124928244	-
Cks2	160.746	chr13	51740600	51746031	+
Ube2b	160.684	chr11	51798647	51813968	-
Trafd1	160.515	chr5	121821733	121835624	-
Impg2	160.456	chr16	56204425	56273866	+
Pfn4	160.345	chr12	4776100	4785072	+
Baz1a	160.326	chr12	55993975	56087323	-
Atp6v0b	160.296	chr4	117556934	117559934	-
1700023A16Rik	160.267	chr6	146798631	146819926	+
Gorasp2	160.216	chr2	70499565	70529782	+
Ccdc146	160.102	chr5	20798778	20930495	-
Nek2	159.761	chr1	193645351	193656928	+
Ik	159.429	chr18	36904309	36917293	+
Spsb1	159.363	chr4	149270392	149329115	-
Setd3	159.214	chr12	109344640	109417494	-
Taf12	159.079	chr4	131830289	131849244	+
Rbm7	158.688	chr9	48296801	48303435	-
Tex15	158.665	chr8	34681015	34696057	+
Huwe1	158.649	chrX	148237824	148369961	+
Aamp	158.598	chr1	74326413	74331312	-
1700008F21Rik	158.555	chr8	131591033	131707632	+
Ube2w	158.454	chr1	16559486	16609367	-
Arl6	158.296	chr16	59613146	59639165	-
Xrcc6	158.247	chr15	81846798	81870514	+
Psmb6	157.987	chr11	70338858	70341360	+
Dgat2	157.69	chr7	106302172	106331223	-
Izumo1	157.56	chr7	52877180	52882612	+
Aqp7	157.503	chr4	40980106	40995169	-
1700080E11Rik	157.355	chr9	105045673	105047412	-
1700012A16Rik	157.304	chr1	155272338	155299704	+
Zfp644	156.727	chr5	107045759	107125849	-
Cd59b	156.424	chr2	103911166	103925114	+
Eif1b	156.026	chr9	120401723	120404445	+
Trim41	155.946	chr11	48619905	48630893	-
Kbtbd4	155.73	chr2	90744942	90750717	+
Adam24	155.715	chr8	41760447	41767553	+
Lrrfip2	155.621	chr9	111020614	111128172	+
Kctd19	155.617	chr8	107906711	107937387	-
Spdyb	155.561	chr5	143977994	143987561	-
Ing3	155.389	chr6	21899614	21926037	+
Tardbp	155.243	chr4	147986490	148001105	-
Gpr160	155.155	chr3	30754871	30796114	+
Hnrnpm	155.127	chr17	33783177	33822403	-
Fbxo24	155.116	chr5	138053732	138066306	-
Klhl12	154.444	chr1	136352131	136387450	+
Fhad1	154.422	chr4	141446765	141567552	-
Cetn1	154.249	chr18	9618416	9619467	-
Akap8l	154.233	chr17	32458368	32487522	-
Fam3b	153.918	chr16	97692692	97726543	-
Zfp60	153.719	chr7	28516427	28536708	+
Fbxo18	153.691	chr2	11664199	11699154	-
Abcf2	153.528	chr5	24071158	24083285	-
1700061G19Rik	153.526	chr17	57015055	57028261	+
Efhb	153.36	chr17	53538213	53602646	-
Gpi1	153.306	chr7	34986345	35015324	-
Gm5592	153.291	chr7	48539696	48545553	+
Ifltd1	152.76	chr6	145345754	145383445	-
Hcfc2	152.725	chr10	82161751	82204137	+
Tmco5b	152.451	chr2	113125888	113137347	+
Abcf1	152.151	chr17	36093763	36106695	-
Ptms	152.031	chr6	124863692	124867964	-
4931408C20Rik	151.989	chr1	26738645	26744305	-
Qtrtd1	151.955	chr16	43861525	43889789	-
Ranbp2	151.907	chr10	57909599	57956902	+
Taf15	151.887	chr11	83286609	83320242	+
Gm6772	151.515	chr12	88075318	88104745	+
Gm4922	151.481	chr10	18499532	18506599	-
Tmc7	151.304	chr7	125679357	125728200	-
Mtap2	151.244	chr1	66221902	66489157	+
Ywhaq	151.043	chr12	21396189	21423297	-
1700019E19Rik	150.84	chr12	87423510	87503409	+
1700123K08Rik	150.785	chr5	139003067	139005922	-
Sccpdh	150.52	chr1	181598361	181617315	+
Slc4a1	150.45	chr11	102210133	102226595	-
Decr2	150.371	chr17	26218155	26227109	-
Med13	150.368	chr11	86079216	86171027	-
Kpnb1	150.36	chr11	97021023	97049206	-
Oit1	150.205	chr14	9181461	9211277	-
Spam1	150.161	chr6	24741198	24751048	+
Tes	149.986	chr6	17015148	17055825	+
Sord	149.798	chr2	122060574	122091073	+
4930588N13Rik	149.655	chr5	150242280	150273195	+
Rec8	149.586	chr14	56237002	56244232	+
Fpgs	149.555	chr2	32538128	32549695	-
Ccdc13	149.451	chr9	121706744	121748579	-
1600027N09Rik	149.387	chr2	180316008	180320339	+
Ndufb8	149.039	chr19	44624743	44629905	-
Sox30	148.865	chr11	45793811	45831494	+
Ehd1	148.863	chr19	6276895	6300096	+
Clp1	148.829	chr2	84563278	84567425	-
Birc2	148.708	chr9	7818225	7835255	-
Cbll1	148.533	chr12	32169693	32184481	-
Hiat1	148.504	chr3	116334084	116365595	-
Eif3a	148.41	chr19	60837018	60866596	-
Cd40	148.236	chr2	164881135	164897154	+
Iqcf4	148.172	chr9	106470649	106473298	-
Zbtb32	148.12	chr7	31374699	31377961	-
Gle1	147.746	chr2	29790928	29814952	+
Tcea2	147.735	chr2	181415014	181422756	+
Rbm12b	147.734	chr4	12067263	12073892	+
Lrrc69	147.64	chr4	14592900	14723199	-
Iqcf6	147.31	chr9	106528912	106529943	+
Kif27	147.245	chr13	58388876	58456223	-
Ndufa5	147.243	chr6	24468665	24477687	-
Ufc1	147.204	chr1	173218694	173225113	-
Mre11a	147.145	chr9	14589150	14638861	+
Yipf1	147.077	chr4	106986967	107032428	+
Nsf	146.996	chr11	103683096	103815370	-
Med21	146.988	chr6	146591100	146599122	+
Dctn5	146.979	chr7	129276554	129292558	+
R3hcc1	146.804	chr14	70097110	70107387	-
Tra2b	146.317	chr16	22245813	22266002	-
E330034G19Rik	146.302	chr14	25112585	25129181	+
Syce1	146.27	chr7	147963127	147973753	-
Fbxo47	146.268	chr11	97715620	97745468	-
Prkcd	146.217	chr14	31408539	31439394	-
Rnmt	146.205	chr18	68460008	68484506	+
Fbxo36	146.194	chr1	84836415	84897061	+
Rbm4	146.169	chr19	4784292	4793877	-
Atp5a1	146.143	chr18	78012506	78021607	+
Srxn1	146.058	chr2	151931465	151937089	+
Cand1	145.819	chr10	118635867	118677111	-
Pphln1	145.774	chr15	93228780	93322343	+
Ube2s	145.624	chr7	4759615	4763942	-
Fam46c	145.608	chr3	100275458	100293115	-
2410089E03Rik	145.247	chr15	8119105	8221158	+
Asb17	145.073	chr3	153507210	153516579	+
Lrp8	145.007	chr4	107474863	107549445	+
D2Ertd750e	144.763	chr2	118639738	118661948	+
Csnk1g1	144.601	chr9	65756816	65892821	+
AI314976	144.589	chr17	48549404	48556591	+
Zpbp2	144.589	chr11	98412410	98419979	+
Lsg1	144.426	chr16	30561454	30587675	-
1190005I06Rik	144.274	chr8	123132501	123158282	-
Mrps36	144.082	chr13	101505894	101514614	-
Dzip1	143.915	chr14	119274741	119322389	-
Daf2	143.631	chr1	132285104	132319576	-
Sec11c	143.537	chr18	65960231	65977311	+
Srsf9	143.506	chr5	115777185	115783089	+
Mpp6	143.271	chr6	50060239	50148597	+
Triml1	143.091	chr8	44215160	44226840	-
Pfn3	143.087	chr13	55516048	55516593	-
4930412F15Rik	143.001	chr4	43672493	43681731	-
Cyb5d1	142.956	chr11	69207113	69208848	-
Tmem66	142.615	chr8	35217616	35233901	+
Zbtb44	142.558	chr9	30838228	30883470	+
Nat15	142.552	chr16	3884618	3904781	+
Pnpla8	142.472	chr12	45370140	45414422	+
Clpx	142.384	chr9	65142101	65178465	+
Odf3l1	142.359	chr9	56696465	56699770	-
Slc25a39	141.236	chr11	102264294	102268831	-
Wdr63	141.032	chr3	145703489	145771000	-
Riiad1	140.955	chr3	94268906	94277513	-
Nudt21	140.838	chr8	96543302	96560939	-
Lyzl4	140.808	chr9	121486960	121550684	-
D4Wsu53e	140.801	chr4	134479539	134483285	+
Eif5	140.602	chr12	112776311	112784964	+
Gm906	140.568	chr13	50340549	50345677	-
Sec11a	140.565	chr7	88060264	88092436	-
Dpf2	140.355	chr19	5897134	5912866	-
Ube2v2	140.318	chr16	15551078	15594611	-
Kif5c	140.17	chr2	49474833	49630298	+
Hemgn	140.146	chr4	46406860	46417055	-
Gml	139.918	chr15	74643884	74649245	-
Nsun2	139.893	chr13	69750894	69774657	+
Rpl36al	139.866	chr12	70283720	70285054	-
Cftr	139.663	chr6	18120686	18272769	+
Srsf4	139.586	chr4	131429553	131457640	+
Hspa9	139.567	chr18	35097068	35114005	-
5330417C22Rik	139.521	chr3	108260986	108339440	-
4930579F01Rik	139.368	chr3	137827098	137849677	-
Dydc2	139.328	chr14	41862497	41882363	-
Dgat1	139.184	chr15	76332444	76342248	-
Morc2b	139.095	chr17	33272534	33276628	-
Ift20	139.001	chr11	78349937	78354975	+
Eif2b2	138.946	chr12	86560462	86567578	+
Dnahc7b	138.797	chr1	46123582	46430395	+
Cib1	138.655	chr7	87372045	87377502	-
Taf7l	138.39	chrX	130994654	131011029	-
Clns1a	138.282	chr7	104845166	104869303	+
Zdhhc11	138.254	chr13	74101309	74130288	+
Top1	138.141	chr2	160471632	160548499	+
Eif2s3y	138.091	chrY	347054	365037	+
Atxn2l	137.802	chr7	133635221	133646816	-
Pwwp2b	137.614	chr7	146434380	146453152	+
Chd5	137.403	chr4	151712759	151764303	+
Ube2u	137.305	chr4	100151471	100222750	+
Sugp1	137.225	chr8	72566711	72595852	+
4932411G14Rik	137.085	chr13	59827285	59833113	-
Dnajc8	136.861	chr4	132091473	132109657	+
Srp9	136.67	chr1	184054867	184062546	+
Adam5	136.536	chr8	25843456	25934841	-
Slc25a41	136.489	chr17	57172194	57181077	-
Psip1	136.244	chr4	83101584	83132294	-
Selk	136.189	chr14	30781565	30788260	+
Etd	136.172	chrX	50788094	50796753	+
Cirbp	136.137	chr10	79630585	79634398	+
Ccdc147	136.062	chr19	48012201	48109869	+
Spem1	135.765	chr11	69634372	69635667	-
Fkbp1a	135.613	chr2	151368234	151387427	+
Cdc26	135.576	chr4	62055622	62069657	-
Pcna	135.562	chr2	132075021	132078916	-
Sf3a2	135.508	chr10	80261479	80267667	+
A930001N09Rik	135.488	chr17	26852594	26913571	+
Pla2g7	135.41	chr17	43705399	43749150	+
Izumo2	135.368	chr7	51964112	51975212	+
Ccdc96	135.272	chr5	36827236	36830820	+
Ttc29	135.063	chr8	80737240	80918225	+
Med4	134.967	chr14	73909855	73918352	+
Aqp9	134.928	chr9	70958467	71011096	-
Ep400	134.916	chr5	111093391	111199736	-
Prss54	134.869	chr8	98083191	98099097	-
Bcl2l11	134.769	chr2	127951773	127988283	+
Slc35a5	134.736	chr16	45139685	45158786	-
Mnt	134.729	chr11	74644425	74659227	+
1700030J22Rik	134.64	chr8	119493498	119502843	-
Ube2j2	134.417	chr4	155317939	155333713	+
Lrrc6	134.32	chr15	66211419	66332472	-
Cenpv	134.31	chr11	62338445	62352763	-
1700007G11Rik	134.255	chr5	98758322	99231038	+
Rab3il1	134.252	chr19	10092717	10110076	+
Coq10b	134.232	chr1	55109613	55129546	+
Aasdhppt	134.211	chr9	4294792	4309494	-
Kdm5b	134.158	chr1	136456754	136529455	+
Rad18	134.035	chr6	112569844	112646664	-
Gm3383	133.933	chr14	5541919	5551837	-
9530077C05Rik	133.913	chr9	22216020	22249123	+
Slx4	133.835	chr16	3979122	4001680	-
Snrk	133.777	chr9	122026383	122078820	+
Efr3a	133.195	chr15	65618602	65705374	+
Slc25a3	133.171	chr10	90579322	90586708	-
Dram1	133.007	chr10	87785548	87819820	-
Bclaf1	133.001	chr10	20032274	20062307	+
Znhit1	132.972	chr5	137458070	137463752	-
Gfer	132.91	chr17	24830135	24833101	-
Ttc39d	132.821	chr17	80615253	80617276	+
Ttc25	132.608	chr11	100406945	100433880	+
Ppp1r27	132.531	chr11	120411288	120412446	-
Crat	132.424	chr2	30255995	30271268	-
Zfp426	132.135	chr9	20272992	20297190	-
4933437F05Rik	132.083	chr12	88562072	88579551	-
Map2k7	131.966	chr8	4238739	4247897	+
Dhx40	131.878	chr11	86582350	86621162	-
Gm8765	131.795	chr13	50793697	50798778	+
Txndc9	131.711	chr1	38040711	38054053	-
Cchcr1	131.686	chr17	35654060	35667960	+
Ylpm1	131.648	chr12	86337270	86411465	+
Rin2	131.387	chr2	145611851	145713352	+
Sae1	131.329	chr7	16912402	16973134	-
1700024P04Rik	131.234	chr13	99754044	99754520	-
Hrasls	131.054	chr16	29209780	29230616	+
Gas8	131.011	chr8	126042734	126060550	+
1500011H22Rik	130.852	chr5	122814592	122821972	-
Abca14	130.666	chr7	127347477	127468866	+
Trim14	130.577	chr4	46519718	46549016	-
2410015M20Rik	130.481	chr17	56746874	56749194	-
Eif4a1	130.46	chr11	69480437	69485925	-
Acsbg2	130.23	chr17	56982526	57013870	-
Csl	130.202	chr10	99220338	99222292	-
Tmem144	130.156	chr3	79617074	79646584	-
4921530L21Rik	130.082	chr14	96280484	96281994	+
Ywhah	129.845	chr5	33361464	33370615	+
1500002O20Rik	129.635	chr7	25184646	25207796	+
Rpgrip1l	129.498	chr8	93740928	93837121	-
Smc1b	129.424	chr15	84895118	84962387	-
Ccdc21	129.338	chr4	133685772	133743000	-
Fh1	129.299	chr1	177531508	177555766	-
Lin7c	129.266	chr2	109731034	109741093	+
Cep170	129.248	chr1	178663783	178737255	-
Gmnn	129.181	chr13	24843713	24853806	-
2010106G01Rik	129.02	chr2	126716130	126758971	-
Galnt7	128.948	chr8	60002621	60131852	-
Ncoa5	128.904	chr2	164825856	164860279	-
Nat6	128.688	chr9	107482500	107486379	+
Hdhd1a	128.597	chr18	50727309	50728353	-
Papola	128.584	chr12	107022911	107077153	+
Commd1	128.577	chr11	22799727	22882284	-
Gtl3	128.542	chr8	97944149	97958769	-
Akna	128.511	chr4	63028161	63064479	-
Vwa3a	128.475	chr7	127883070	127949054	+
Rbm5	128.443	chr9	107642825	107673333	-
Tekt4	128.401	chr17	25608534	25613539	+
Srsf1	128.275	chr11	87861172	87867259	+
Gm6760	128.253	chrX	61404580	61405373	-
Wdtc1	128.253	chr4	132848380	132895230	-
Thumpd3	128.054	chr6	112996320	113018267	+
Smarce1	127.985	chr11	99070361	99092331	-
Skiv2l2	127.915	chr13	113657987	113717588	-
Tmem225	127.865	chr9	39955706	39958463	+
Git1	127.754	chr11	77306913	77321276	+
Polr2a	127.383	chr11	69547911	69571725	-
Zfr	127.279	chr15	12047605	12115205	+
Tomm6	127.15	chr17	47823593	47825335	-
4933436C20Rik	127.029	chr8	94849931	94880019	-
Echdc2	126.996	chr4	107838041	107851913	+
D19Ertd386e	126.883	chr19	42593294	42666746	+
Sorbs3	126.849	chr14	70580274	70607444	-
Bsg	126.82	chr10	79167102	79174724	+
Lrwd1	126.726	chr5	136598935	136611944	-
Rnf148	126.7	chr6	23603894	23605136	-
Nudt2	126.688	chr4	41412180	41427959	+
Ncaph	126.681	chr2	126929545	126959690	-
Pabpc1l	126.65	chr2	163851185	163876274	+
Sil1	126.578	chr18	35426049	35658579	-
Hsf2bp	126.224	chr17	32081713	32171453	-
Cars	126.118	chr7	150743134	150785995	-
Bcas1	126.03	chr2	170172490	170253345	-
9130014G24Rik	125.877	chr10	10055500	10192112	-
Stk11ip	125.846	chr1	75518103	75533910	+
Nptn	125.796	chr9	58430046	58500686	+
1700011E24Rik	125.795	chr17	87788910	87827081	-
Hint1	125.537	chr11	54679939	54683998	+
2610301B20Rik	125.397	chr4	10801644	10826570	+
Zfp687	125.361	chr3	94810623	94819160	-
Heatr8	125.334	chr4	106353021	106400535	-
4930596D02Rik	125.302	chr14	36622671	36625164	-
Rnaseh2a	125.181	chr8	87480508	87489910	-
Tmem123	125.162	chr9	7764076	7794332	+
Park7	125.027	chr4	150271241	150284030	-
Cab39l	124.943	chr14	60059817	60167740	+
Rab28	124.929	chr5	42016214	42099394	-
Gak	124.815	chr5	108998432	109058758	-
Mycbp	124.787	chr4	123582255	123589493	+
Rpl26	124.735	chr11	68715067	68718036	+
Rc3h1	124.556	chr1	162836541	162905107	+
Slc7a4	124.529	chr16	17572110	17576764	-
Poc1b	124.461	chr10	98569804	98660622	+
Ergic1	124.457	chr17	26698456	26793878	+
Morn4	124.413	chr19	42149428	42160860	-
4921511H03Rik	124.195	chr5	7304163	7311491	+
4921507P07Rik	124.171	chr6	50523302	50546589	-
Dnajb8	124.097	chr6	88172261	88173250	+
Osgin1	124.065	chr8	121961061	121970156	+
Ydjc	124.036	chr16	17147059	17148950	+
4930563D23Rik	123.98	chr16	92319007	92321686	-
Uba2	123.728	chr7	34925715	34953548	-
Ubl4b	123.663	chr3	107356615	107357991	-
Gm5617	123.661	chr9	48303449	48304077	+
4922502D21Rik	123.655	chr6	129272182	129281799	-
Napa	123.651	chr7	16683991	16703324	+
Lclat1	123.649	chr17	73457324	73592706	+
Rps14	123.602	chr18	60934249	60938200	+
Usp42	123.574	chr5	144471194	144493149	-
Nab2	123.348	chr10	127097973	127103759	-
Samd8	123.202	chr14	22569752	22617947	+
Xab2	123.128	chr8	3610089	3621296	-
Csnk1a1	123.046	chr18	61715235	61747953	+
Zfp949	122.985	chr9	88442857	88465924	+
Enah	122.894	chr1	183834575	183950111	-
Casp8ap2	122.893	chr4	32702447	32740240	+
Snrpd3	122.739	chr10	74980786	74998185	+
Itgb1bp1	122.673	chr12	21275666	21292098	-
Snip1	122.657	chr4	124743936	124751287	+
3110009E18Rik	122.549	chr1	122017763	122084766	+
Baz2b	122.528	chr2	59737419	59963797	-
Wfdc15a	122.36	chr2	164024607	164025853	-
Sdha	122.314	chr13	74459702	74487688	-
Myo6	122.303	chr9	80012840	80159536	+
Tsga14	122.143	chr6	30603456	30643682	-
Rab4b	121.509	chr7	27953451	27963902	-
Tlk2	121.473	chr11	105042843	105145270	+
Lpin1	121.433	chr12	16542474	16596576	-
Cct5	121.387	chr15	31520638	31531559	-
Tmem120a	121.307	chr5	136211359	136220042	-
1810063B07Rik	121.279	chr14	20894857	20902394	-
Rp9	121.259	chr9	22252755	22272800	-
Mdn1	121.224	chr4	32744093	32862192	+
Ccdc105	121.184	chr10	78209668	78215812	-
Shb	121.035	chr4	45436147	45543700	-
Ppil6	120.934	chr10	41210244	41234094	+
Trpc4ap	120.831	chr2	155460012	155518120	-
Armc4	120.779	chr18	7088230	7297899	-
Stk19	120.74	chr17	34960937	34973848	-
Stk30	120.665	chr12	112046007	112079149	-
Ppwd1	120.613	chr13	104995201	105018924	-
Ncbp1	120.6	chr4	46151382	46185274	+
Dennd4b	120.578	chr3	90070455	90084587	+
Zc3h15	120.576	chr2	83484734	83504773	+
Klf17	120.513	chr4	117429263	117438271	-
Casc3	120.487	chr11	98671121	98695121	+
Ccdc11	120.462	chr18	74442753	74519638	+
Wdr64	120.456	chr1	177628723	177745864	+
Rnf138	120.43	chr18	21159841	21186724	+
Agbl3	120.393	chr6	34730431	34807932	+
Dynlt1b	120.355	chr17	6429259	6435443	+
Odf4	120.303	chr11	68735336	68740583	-
Taf11	120.267	chr17	28038072	28044669	-
Pip5k1a	120.22	chr3	94863519	94910780	-
Rdh11	120.141	chr12	80276537	80292806	-
Wdr60	120.064	chr12	117445522	117501498	-
N4bp2	119.949	chr5	66154759	66218023	+
Sumo1	119.941	chr1	59696277	59727678	-
Ccdc108	119.819	chr1	74948653	74982173	-
Stil	119.814	chr4	114672722	114715803	+
Itgam	119.75	chr7	135206153	135262005	+
Sh3gl3	119.75	chr7	89319727	89455927	+
Zfp933	119.708	chr4	147197094	147222484	-
Rp2h	119.563	chrX	19941733	19977475	+
St8sia3	119.483	chr18	64414012	64435798	+
Map2k3	119.37	chr11	60745558	60766305	+
Pa2g4	119.144	chr10	127994821	128002990	-
Iqca	119.135	chr1	91938706	92049976	-
Catsper2	119.128	chr2	121220090	121239528	-
4930557A04Rik	119.091	chrX	9426828	9427378	+
Ubn2	119.012	chr6	38383924	38462763	+
Zmynd11	118.85	chr13	9684081	9764560	-
Zfp819	118.796	chr7	50862538	50873649	+
4930453N24Rik	118.626	chr16	64765930	64770765	-
4930550C14Rik	118.597	chr9	53213390	53240908	+
4921539E11Rik	118.407	chr4	102903050	102963468	-
Urod	118.348	chr4	116662821	116666980	-
Wwp2	118.336	chr8	109960297	110082495	+
Atpaf1	118.18	chr4	115457418	115484919	+
Senp2	118.175	chr16	22009556	22049342	+
Uba52	118.15	chr8	73032164	73034266	-
Gtf2h1	118.143	chr7	54051463	54079170	+
4930432K09Rik	118.012	chr5	88254721	88275411	+
Tcp10b	117.916	chr17	13253976	13275092	+
Adam1a	117.75	chr5	121968612	121971704	-
Phrf1	117.664	chr7	148414686	148448650	+
Plk1s1	117.548	chr2	146681624	146795825	+
Ppp3ca	117.534	chr3	136333733	136598743	+
Adss	117.476	chr1	179693308	179726640	-
Zhx3	117.452	chr2	160596182	160698726	-
4930458L03Rik	117.373	chr13	65018713	65024503	+
Vdac3	117.276	chr8	23687546	23704285	-
Zfp72	117.244	chr13	74508873	74514014	-
Wbp2nl	117.164	chr15	82129413	82144988	+
Znrf4	117.111	chr17	56650670	56651906	-
Zfp367	117.035	chr13	64234364	64254507	-
Elovl5	116.882	chr9	77765171	77832326	+
Ambra1	116.542	chr2	91570294	91759006	+
Rbbp4	116.521	chr4	128984343	129012614	-
Ccin	116.449	chr4	43996375	43998405	+
Trip12	116.195	chr1	84717763	84835879	-
Dynlt1a	116.115	chr17	6310544	6317474	-
Mex3c	115.732	chr18	73732358	73752232	+
Tmcc1	115.732	chr6	115968635	116143392	-
Rb1cc1	115.668	chr1	6204742	6266185	+
G2e3	115.52	chr12	52449216	52477973	+
Atf2	115.451	chr2	73654578	73730685	-
Ccdc6	115.295	chr10	69559868	69655948	+
Atp5o	115.276	chr16	91925467	91931875	-
Tsnaxip1	115.272	chr8	108351643	108368576	+
Tbpl1	115.235	chr10	22423682	22451253	-
Lztfl1	115.054	chr9	123606710	123626675	-
Lsm14a	115.034	chr7	35129738	35174559	-
Pdcd5	115.021	chr7	36427003	36432501	-
4932412H11Rik	114.983	chr5	3845172	3866596	+
BC048507	114.912	chr13	67964262	67964860	+
Fam161a	114.869	chr11	22913386	22923741	+
Eftud2	114.867	chr11	102699785	102742289	-
Rrp9	114.838	chr9	106379639	106387746	+
Ftmt	114.578	chr18	52491189	52492650	+
Kpna1	114.571	chr16	35983448	36036248	+
Zscan21	114.516	chr5	138558132	138575487	+
Nup205	114.486	chr6	35127615	35197598	+
Gm4934	114.485	chr13	59813644	59820650	+
Gpbp1	114.429	chr13	112215887	112280249	-
Rnf121	114.427	chr7	109168385	109213646	-
Sdcbp	114.421	chr4	6292826	6323269	+
Dcaf6	114.399	chr1	167259631	167390594	-
Hnrnpl	114.198	chr7	29595908	29607285	+
Dap3	114.175	chr3	88724724	88754204	-
Anapc13	114.084	chr9	102528625	102536574	+
Krcc1	114.058	chr6	71222012	71235313	+
Adam6a	113.991	chr12	114782118	114784625	+
Ttll6	113.986	chr11	95995099	96026766	+
Ubap2	113.972	chr4	41141347	41222168	-
Arpm1	113.929	chr3	30495994	30498792	-
Fkbpl	113.839	chr17	34781827	34783272	+
Ept1	113.833	chr5	30559157	30598976	+
Ppm1j	113.802	chr3	104583973	104588935	+
Kif3b	113.765	chr2	153117151	153159125	+
Cstf2	113.625	chrX	130593887	130621360	+
Safb	113.526	chr17	56724404	56745717	+
Naga	113.466	chr15	82159961	82169256	-
Sympk	113.453	chr7	19609725	19639971	+
Pbx4	113.227	chr8	72356602	72396191	+
Mmachc	113.065	chr4	116375038	116380990	-
Rps6ka6	113.015	chrX	108501800	108651554	-
4933424B01Rik	112.898	chr6	146498153	146526357	-
1700006A11Rik	112.846	chr3	124104072	124128946	-
Nxf1	112.726	chr19	8831592	8845400	+
Mark3	112.712	chr12	112812720	112894438	+
Fam53c	112.619	chr18	34918559	34933414	+
Lrrc40	112.437	chr3	157699666	157731442	+
Fbxo34	112.246	chr14	48092235	48151637	+
D430042O09Rik	112.223	chr7	132851389	133018311	+
Zdhhc19	112.193	chr16	32496366	32507300	+
4930432K21Rik	112.191	chr8	86671936	86696496	+
Isg20l2	112.131	chr3	87734235	87744608	+
Ttll8	111.993	chr15	88744327	88784848	-
Snx3	111.923	chr10	42221859	42255175	+
Ccdc113	111.825	chr8	98057999	98082788	+
Stt3b	111.643	chr9	115151699	115219539	-
Usp20	111.591	chr2	30837798	30878175	+
Tmem161b	111.547	chr13	84361900	84435571	+
Rhov	111.529	chr2	119094936	119096962	-
Cnot7	111.466	chr8	41578389	41596658	-
Tmem56	111.242	chr3	120904927	120966234	-
Usp47	111.229	chr7	119167019	119254900	+
Ttll7	111.18	chr3	146515330	146645714	+
1700030K09Rik	111.156	chr8	74967778	74984440	+
Rabl5	111.15	chr5	137384019	137389114	+
Tjp1	111.076	chr7	72441050	72516130	-
Spaca3	111.048	chr11	80671890	80681316	+
Ttc18	110.956	chr14	21213411	21271447	-
Pbp2	110.92	chr6	135259146	135260402	-
Arl3	110.882	chr19	46605598	46647575	-
1700001K19Rik	110.85	chr12	111905898	111920829	-
Vasp	110.783	chr7	19842278	19857203	-
Ttll11	110.66	chr2	35606759	35835144	-
Ubr7	110.635	chr12	103996184	104015911	+
Ptbp1	110.623	chr10	79317349	79327178	+
Hdgf	110.58	chr3	87710242	87720054	+
Nup50	110.511	chr15	84753857	84773393	+
Mcm7	110.501	chr5	138605816	138613090	-
Odc1	110.377	chr12	17551678	17558308	+
Pbk	110.318	chr14	66424747	66436659	+
Mga	110.309	chr2	119722963	119795317	+
Rbm28	110.307	chr6	29073572	29114724	-
Snrnp35	110.302	chr5	124933163	124941131	+
4833427G06Rik	110.247	chr9	50889417	50910183	-
Srp19	110.224	chr18	34490798	34496253	+
4930529F22Rik	110.205	chr8	41878626	41882657	+
Adam39	110.176	chr8	41908362	41912215	+
Syna	110.15	chr5	135033123	135036041	-
Jam3	110.142	chr9	26904968	26963006	-
Psmd2	110.07	chr16	20651724	20663487	+
Ubl3	110.044	chr5	149316206	149364364	-
Rae1	110.006	chr2	172825617	172841240	+
Kif2c	109.962	chr4	116832240	116855229	-
1110018G07Rik	109.913	chr12	86259098	86311836	-
Fam100b	109.905	chr11	116295407	116300391	+
Zcchc17	109.897	chr4	129993328	130037190	-
Gnpda2	109.846	chr5	69966240	69983524	-
Nop14	109.785	chr5	34981184	35002797	-
9930013L23Rik	109.71	chr7	91081366	91235015	-
Cdca3	109.619	chr6	124780193	124783719	+
Cox16	109.533	chr12	82571690	82586097	-
Ccdc123	109.524	chr7	36182111	36223703	+
Nek11	109.348	chr9	105064796	105297617	-
Pcf11	109.065	chr7	99792221	99818422	-
Ubqlnl	109.043	chr7	111296772	111299070	-
Mccc2	109.003	chr13	100718486	100785594	-
Setd2	108.974	chr9	110435100	110521137	+
Tcp10c	108.957	chr17	13547437	13570089	+
Ndufb5	108.9	chr3	32635984	32650481	+
Efcab7	108.776	chr4	99496190	99585388	+
2010109I03Rik	108.718	chr15	74708765	74712134	-
Akr1e1	108.7	chr13	4591735	4608410	-
Arl6ip6	108.648	chr2	53051117	53078255	+
Matr3	108.326	chr18	35721811	35751699	+
Mrps14	108.299	chr1	162125390	162131317	+
Ccdc135	108.264	chr8	97579002	97602041	+
Abcg2	108.126	chr6	58546665	58642445	+
Nudt4	107.968	chr10	95009640	95026801	-
D5Ertd579e	107.851	chr5	36943137	37087208	-
Slc9a8	107.826	chr2	167247220	167302498	+
Arl6ip1	107.679	chr7	125262403	125273139	-
Rnf19a	107.663	chr15	36169688	36212902	-
Crybg3	107.311	chr16	59490600	59555578	-
Rsbn1	107.29	chr3	103718042	103770543	+
Ift140	107.216	chr17	25153030	25236442	+
Chchd2	107.179	chr5	130357031	130363340	-
Tlcd1	107.104	chr11	77992267	77994274	+
Ranbp9	106.745	chr13	43498041	43576342	-
Siah2	106.622	chr3	58478870	58496310	-
Adam6b	106.504	chr12	114727775	114730046	+
Ccdc117	106.243	chr11	5428890	5442220	-
Mt1	106.213	chr8	96702988	96704227	+
Gm597	106.194	chr1	28832966	28837097	-
4930529M08Rik	106.15	chr2	145760519	145789962	+
Ezh2	106.059	chr6	47480272	47545029	-
1700012P22Rik	106.025	chr4	144008093	144028675	-
Gm5941	105.995	chrX	89735287	89736018	+
Rad21	105.926	chr15	51794149	51823306	-
Bpifa3	105.82	chr2	153956082	153964091	+
Elf2	105.805	chr3	51059586	51129909	-
Pafah1b2	105.729	chr9	45773393	45792954	-
Lyrm2	105.726	chr4	32887233	32889229	+
Ip6k2	105.661	chr9	108698324	108708664	+
Hnrnpr	105.561	chr4	135866890	135896593	+
Ubap1	105.458	chr4	41296028	41336799	+
Tmed7	105.438	chr18	46745581	46757189	-
Eif3g	105.334	chr9	20698792	20703034	-
Pcm1	105.224	chr8	42325112	42419441	+
Hsph1	105.108	chr5	150419419	150438890	-
Rtcd1	104.932	chr3	116191881	116211093	-
Zfp941	104.91	chr7	147995575	148008077	-
1700008O03Rik	104.763	chr7	51615414	51630400	-
Med26	104.755	chr8	75018457	75072209	-
Aldh3a2	104.718	chr11	61058256	61080629	-
Crip2	104.694	chr12	114378446	114383717	+
4930455F23Rik	104.634	chr1	166205728	166217978	+
Efcab5	104.433	chr11	76903416	77002470	-
Pgrmc2	104.425	chr3	40870247	40886968	-
Mfsd7c	104.394	chr12	87087488	87154535	+
Prpf38a	104.361	chr4	108237471	108251941	-
Dpcd	104.325	chr19	45635104	45652777	+
Ppp5c	104.216	chr7	17589989	17613263	-
4933402P03Rik	104.147	chr11	69630067	69631942	-
Psma4	104.099	chr9	54798665	54805837	+
Srsf2	104.077	chr11	116711210	116714408	-
Rere	104.002	chr4	149656024	149996075	+
Pspc1	103.93	chr14	57341285	57397153	-
1520402A15Rik	103.927	chr4	115809332	115817221	-
Scmh1	103.902	chr4	120077885	120202804	+
Supt6h	103.826	chr11	78020250	78059205	-
Smok3b	103.824	chr5	138478451	138491861	+
1700013H16Rik	103.742	chrX	51046077	51061008	-
Rasal1	103.694	chr5	121098830	121129602	+
Ndufa12	103.624	chr10	93661753	93683693	+
Wdr16	103.576	chr11	67738307	67779144	-
Acbd3	103.524	chr1	182656173	182684335	+
Ttc21b	103.524	chr2	66022385	66094674	-
Usp32	103.385	chr11	84797989	84953457	-
Usp12	103.372	chr5	147546387	147606532	-
Sqstm1	103.328	chr11	50013653	50024292	-
Spag6	103.268	chr16	16753108	16829456	-
Herc4	103.255	chr10	62706544	62780629	+
Dnahc8	103.106	chr17	30763880	31012209	+
9030025P20Rik	103.002	chr17	15115827	15128541	+
4930578N16Rik	102.957	chr2	69596113	69627543	-
Tmtc2	102.824	chr10	104624719	105011535	-
Dnalc1	102.742	chr12	85455277	85484460	+
Cdc34	102.705	chr10	79144939	79151143	+
Arl9	102.699	chr5	77433079	77438502	+
Rps11	102.696	chr7	52377757	52379759	-
Cobra1	102.593	chr2	25055231	25067009	-
Skiv2l	102.592	chr17	34976170	34987149	-
Ruvbl2	102.437	chr7	52677267	52689834	-
Csde1	102.308	chr3	102824468	102862112	+
Tbca	102.177	chr13	95558897	95612854	+
Mex3d	102.103	chr10	79843099	79850396	-
Cpxm1	102.046	chr2	130216510	130223365	-
Zfp866	102.002	chr8	72285222	72298810	-
Haus5	101.957	chr7	31438726	31450013	-
BC005537	101.949	chr13	24893525	24904768	+
Abcc12	101.91	chr8	89028739	89090489	-
Gtf2a1l	101.902	chr17	89067999	89114490	+
Tfg	101.853	chr16	56690441	56717563	-
Rfc2	101.674	chr5	135058559	135074198	+
Rfk	101.662	chr19	17468532	17475839	+
Ppp2r2d	101.448	chr7	146038068	146074739	+
Canx	101.33	chr11	50107458	50139175	-
Fancg	101.31	chr4	43015208	43023173	-
Kpna2	101.31	chr11	106849942	106860839	-
Armc3	101.29	chr2	19120744	19231861	+
Oxnad1	101.227	chr14	32898913	32916389	+
Atad1	101.178	chr19	32747052	32786788	-
Psmd6	101.161	chr14	14944698	14953418	-
Aldh1l1	100.959	chr6	90500841	90549165	+
Cgnl1	100.808	chr9	71474315	71619409	-
Fam184a	100.689	chr10	53352951	53470715	-
Col16a1	100.452	chr4	129725083	129776521	+
Dhx8	100.338	chr11	101594269	101628671	+
Atxn7l1	100.292	chr12	33832550	33936022	+
Atxn7l1	100.292	chr12	33987379	34053142	+
Cbwd1	100.237	chr19	24994405	25036106	-
Uqcrc1	100.148	chr9	108838660	108851686	+
Slc22a16	100.126	chr10	40290167	40323938	+
Amac1	99.9938	chr11	69573386	69575346	-
Nat10	99.9913	chr2	103561415	103601407	-
4833442J19Rik	99.9227	chr6	149090034	149099692	+
Dda1	99.8384	chr8	73993092	74000334	+
Casc5	99.8134	chr2	118872854	118929857	+
Tiprl	99.7463	chr1	167142416	167167089	-
1700039E15Rik	99.7048	chr7	52538242	52544363	+
Rnf181	99.6198	chr6	72309707	72312375	-
Cecr2	99.5961	chr6	120616438	120721209	+
Mad2l2	99.589	chr4	147514598	147519805	+
Stk33	99.4927	chr7	116422729	116582567	-
Gm527	99.4315	chr12	66018897	66025578	+
Mul1	99.2708	chr4	137990586	137998180	+
Mbd2	99.0498	chr18	70727945	70785785	+
Eif3k	98.9836	chr7	29756391	29766833	-
D6Mm5e	98.9802	chr6	82896915	82980303	+
Fam18b	98.9756	chr11	62692991	62708686	+
1810024B03Rik	98.8833	chr2	127012090	127034016	-
Pcmt1	98.8694	chr10	7350033	7383382	-
Rnf216	98.829	chr5	143752571	143874699	-
Pdap1	98.7506	chr5	145889638	145900958	-
Hsf2	98.6792	chr10	57206190	57232949	+
Shcbp1	98.6088	chr8	4735979	4779534	-
1700022I11Rik	98.5778	chr4	42982817	42987197	+
Wdr5	98.5489	chr2	27370666	27392055	+
Kifap3	98.5417	chr1	165709809	165847231	+
Rpl10l	98.4619	chr12	67384365	67385388	-
Il31	98.1842	chr5	123930161	123932110	-
Secisbp2	98.1022	chr13	51747082	51779015	+
Olfr701	98.0204	chr7	113957657	113964223	+
Oxct1	98.0196	chr15	3976427	4105344	+
4933402N03Rik	97.9363	chr7	138281860	138289797	-
Haus7	97.8362	chrX	70682653	70704368	-
Cenpj	97.7978	chr14	57145597	57190683	-
Rbm25	97.7821	chr12	84973183	85024073	+
Ube2n	97.7526	chr10	94977795	95008292	+
Pabpc2	97.7404	chr18	39933150	39935736	+
4930538K18Rik	97.7389	chr4	118877659	118890822	-
Ankrd9	97.7288	chr12	112213562	112217231	-
Zmynd10	97.6033	chr9	107449640	107453650	+
Prmt7	97.352	chr8	108734953	108775594	+
Cct6a	97.3115	chr5	130293260	130322231	+
Eef2	97.3092	chr10	80639375	80645254	+
Immt	97.2944	chr6	71781313	71825260	+
Acsl5	97.2466	chr19	55327858	55371118	+
1700001F09Rik	97.2099	chr14	44020916	44026344	-
Tmem8b	97.2058	chr4	43681842	43705539	+
Ino80e	97.153	chr7	133995946	134004977	-
Ccdc151	97.14	chr9	21794314	21807078	-
Dlg4	97.0134	chr11	69832106	69859033	+
Pacs2	97.0075	chr12	114252718	114312612	+
Rad23b	96.9483	chr4	55362913	55405109	+
Gm595	96.9217	chrX	46194642	46230890	-
Pdrg1	96.8862	chr2	152834625	152841119	-
Clu	96.8513	chr14	66587319	66600382	+
Nhedc1	96.6387	chr3	135011000	135060791	+
Tra2a	96.6181	chr6	49193919	49214051	-
Tm9sf2	96.5868	chr14	122506303	122558825	+
1700030F18Rik	96.5043	chr15	99748778	99762089	-
Yme1l1	96.4854	chr2	23012024	23054780	+
Bcl2l1	96.4617	chr2	152606403	152657418	-
Pnrc2	96.3439	chr4	135426840	135429761	-
Rnf10	96.2501	chr5	115691778	115722904	-
Fam108b	96.1698	chr19	21727798	21760127	+
D2Wsu81e	96.152	chr2	30028966	30033979	-
Zfp711	96.1044	chrX	109714134	109748671	+
Mrpl39	96.0564	chr16	84717824	84735547	-
Sap18	96.0018	chr14	58417025	58423817	+
Zfand6	95.9022	chr7	91763563	91827861	-
Mdc1	95.8244	chr17	35978442	35996615	+
Mbd4	95.7339	chr6	115790714	115803359	-
Gosr1	95.7173	chr11	76540103	76577057	-
Cdc27	95.5718	chr11	104363842	104411934	-
Celf6	95.3652	chr9	59426143	59455099	+
Aqp11	95.3343	chr7	104874888	104886757	-
Kcnu1	95.3336	chr8	26960094	27048406	+
Rsph9	95.1804	chr17	46266225	46281147	-
E230008N13Rik	95.1441	chr4	45903174	45963646	+
Fam63a	94.9774	chr3	95086856	95100086	+
Arpc2	94.9385	chr1	74283123	74314787	+
Rabl3	94.9287	chr16	37539979	37572471	+
Ppp3cc	94.7799	chr14	70617704	70689256	-
Gm884	94.6148	chr11	103395890	103476053	-
Chmp2a	94.5558	chr7	13617354	13620126	-
Vps13a	94.4498	chr19	16689855	16855423	-
Pcbp2	94.3982	chr15	102301062	102330490	+
Stt3a	94.3981	chr9	36539997	36575163	-
Dip2a	94.2601	chr10	75725793	75808036	-
Sdhc	94.2025	chr1	173059287	173080734	-
Wdr75	94.1888	chr1	45852345	45880458	+
Galnt3	94.1157	chr2	65920822	65962850	-
Got1l1	94.082	chr8	28307930	28313019	-
Mettl11a	93.8965	chr2	30663496	30678534	+
Zdhhc4	93.8786	chr5	144078169	144090905	-
Myh10	93.7717	chr11	68505416	68630126	+
Ddx51	93.6981	chr5	111082469	111089515	+
Agpat9	93.6909	chr5	101275247	101328121	+
Lgals8	93.6375	chr13	12531681	12554005	-
Tomm7	93.5623	chr5	23344761	23349963	-
Adam4	93.5377	chr12	82520535	82522865	-
Rnf4	93.5171	chr5	34679038	34696079	+
Csnka2ip	93.4904	chr16	64477636	64478960	-
Nat9	93.1664	chr11	115044145	115048630	-
Tmem165	93.1381	chr5	76612904	76638269	+
4932425I24Rik	93.0907	chr16	38297839	38341946	-
Clpb	93.0829	chr7	108812281	108938682	+
Mycbp2	92.8316	chr14	103512627	103746017	-
Eno1	92.8031	chr4	149611305	149622982	+
Hist1h2aa	92.7591	chr13	24026330	24026720	+
Rbm17	92.6824	chr2	11507065	11524826	-
Notch4	92.5137	chr17	34701239	34725488	+
Ndufb9	92.3885	chr15	58765364	58771044	+
Svop	92.3548	chr5	114476921	114541389	-
Sycp1	92.2284	chr3	102622421	102740023	-
Gde1	92.2009	chr7	125832071	125849252	-
Gm10377	92.0981	chr14	43371374	43376742	-
4930503L19Rik	92.0044	chr18	70612793	70632134	-
Smek2	91.9644	chr11	29072906	29120797	+
Sbno1	91.9512	chr5	124818710	124875923	-
Cdc73	91.8987	chr1	145454628	145549814	-
Mum1	91.8694	chr10	79689342	79707889	+
Chl1	91.8511	chr6	103460869	103683029	+
D1Pas1	91.6076	chr1	188791294	188794506	+
Unc50	91.5192	chr1	37487016	37495969	+
Otud7b	91.4617	chr3	95908449	95965052	+
Ing2	91.4209	chr8	48752531	48760513	-
Stk25	91.4042	chr1	95517327	95532304	-
Fyb	91.357	chr15	6529870	6613312	+
Tmem33	91.3404	chr5	67651890	67682700	+
Gabarap	91.3237	chr11	69804871	69808451	+
Lyrm1	91.2849	chr7	127039805	127060264	+
Pemt	91.2703	chr11	59784118	59850341	-
Cwc15	91.2562	chr9	14305062	14315064	+
Arid4b	91.2205	chr13	14156058	14291870	+
4921501E09Rik	91.1856	chr17	33201087	33205003	-
Ppp1r7	90.9953	chr1	95240221	95264195	+
Terf1	90.8922	chr1	15795738	15833510	+
Rg9mtd2	90.8599	chr3	137806501	137822784	+
Iqub	90.8097	chr6	24394864	24465067	-
Lrp5	90.634	chr19	3584824	3686564	-
l7Rn6	90.569	chr7	97067198	97089695	-
Aatf	90.5474	chr11	84236357	84327003	-
Wdr35	90.3422	chr12	8980806	9035653	+
1110058L19Rik	90.3314	chr1	24002777	24012479	-
Nol12	90.3073	chr15	78765362	78772340	+
Rnf17	90.1986	chr14	57021533	57143868	+
1700019D03Rik	90.1985	chr1	52981970	53009684	-
D19Ertd737e	90.1984	chr19	60274488	60302600	-
Zkscan17	90.1857	chr11	59299022	59320142	-
Acpl2	90.1429	chr9	96723761	96789841	-
2310001A20Rik	90.0939	chr2	150408816	150434259	-
4930547C10Rik	90.0152	chr4	52609145	52625035	+
Brd1	89.9113	chr15	88517464	88564649	-
Cit	89.6596	chr5	116295664	116456350	+
Zfp41	89.651	chr15	75447114	75455725	+
Rcbtb1	89.6274	chr14	59820064	59856102	+
Nme1	89.5713	chr11	93820238	93829835	-
Ube2r2	89.5263	chr4	41083053	41140403	+
Gnptab	89.526	chr10	87842156	87910074	+
Fam179b	89.5073	chr12	66066728	66123560	+
Tns1	89.4362	chr1	73956804	74171021	-
Scamp2	89.4137	chr9	57408750	57436605	+
Bet1	89.327	chr6	4026903	4036927	-
Etf1	89.252	chr18	35062438	35091657	-
Sgip1	89.1658	chr4	102432967	102643782	+
2410004B18Rik	89.155	chr3	145600995	145607239	+
Dek	89.1528	chr13	47180135	47201589	-
Gm136	89.0928	chr4	34691036	34703508	-
1700025F22Rik	88.9176	chr19	11214172	11239810	-
Tubb6	88.9048	chr18	67550384	67562403	+
Ift172	88.8772	chr5	31555651	31593487	-
Slxl1	88.8752	chrX	52480052	52496913	+
Dynlt1f	88.8596	chr17	6600795	6607794	+
Dynlt1f	88.8596	chr17	6853656	6860656	-
Dctn6	88.857	chr8	35153476	35171565	-
Ehbp1	88.6689	chr11	21905828	22186798	-
4930433I11Rik	88.578	chr7	48242978	48250203	+
Zfp719	88.5015	chr7	50834955	50849080	+
Llph	88.4893	chr10	119664115	119669126	+
Ier3ip1	88.4726	chr18	77168765	77180353	+
Cib4	88.3689	chr5	30787956	30848209	-
Efcab1	88.2409	chr16	14906738	14924615	+
Itgad	88.2021	chr7	135317459	135349017	+
Zcrb1	88.1997	chr15	93216543	93228721	-
Lpcat2b	88.1609	chr5	107860567	107864058	+
Hmbox1	88.1523	chr14	65441054	65568684	-
Glt6d1	88.1155	chr2	25649486	25671356	-
Man2a1	88.1088	chr17	64950988	65104450	+
Gm3020	88.0278	chr14	3757740	3775300	+
1700017D01Rik	88.0191	chr19	11171305	11205368	-
Ubr5	88.008	chr15	37897082	38008608	-
Dnttip1	87.9484	chr2	164571514	164593719	+
Pcmtd2	87.9336	chr2	181572607	181592155	+
Foxred1	87.9285	chr9	35011805	35018510	-
Zc3h7a	87.8743	chr16	11136686	11176486	-
Dlat	87.7881	chr9	50442737	50467885	-
Mrpl52	87.7816	chr14	55045745	55048587	+
Zfp629	87.7714	chr7	134750548	134757947	-
Spata1	87.7066	chr3	146120166	146162717	-
Acot10	87.6959	chr15	20594968	20596505	-
Iqch	87.6423	chr9	63269427	63450255	-
Antxrl	87.6335	chr14	34866655	34889185	+
Usp54	87.5898	chr14	21368133	21437576	-
Ddx1	87.5785	chr12	13226112	13255980	-
AW554918	87.567	chr18	25327520	25625822	+
Cct4	87.5651	chr11	22890592	22903336	+
Cops4	87.4978	chr5	100947327	100976821	+
Cdk2	87.4878	chr10	128134994	128142107	-
Prpf3	87.4219	chr3	95634544	95659676	-
Xpnpep1	87.4028	chr19	53065672	53113032	-
Gabarapl1	87.3427	chr6	129483209	129492349	+
Tmem38b	87.3191	chr4	53838916	53874890	+
Rab1	87.2709	chr11	20101604	20126859	+
Thg1l	87.2511	chr11	45761655	45768996	-
Hax1	87.1844	chr3	89799378	89802608	-
Spag17	87.1615	chr3	99689339	99947245	+
2310061C15Rik	87.0443	chr8	119412584	119445336	-
Chmp4b	87.0284	chr2	154482761	154520519	+
Btf3l4	86.9681	chr4	108486899	108506189	-
Trap1	86.9068	chr16	4039976	4077810	-
Rplp2	86.8988	chr7	148633548	148637241	+
Ccdc164	86.8564	chr5	30607913	30668993	+
Arid1a	86.8542	chr4	133234922	133309526	-
Brpf3	86.7949	chr17	28938070	28975734	+
Nkx2-6	86.6898	chr14	69789858	69793597	+
Stk4	86.6008	chr2	163899913	163981257	+
Slc9a1	86.4535	chr4	132925686	132979613	+
Dyrk3	86.3891	chr1	133025017	133034811	-
Alkbh1	86.3504	chr12	88769027	88784789	-
Psma8	86.3406	chr18	14864659	14920808	+
Med23	86.3148	chr10	24589791	24633335	+
Chchd6	86.3042	chr6	89333139	89545646	-
Adam25	86.2471	chr8	41837561	41841530	+
Efhd1	86.1985	chr1	89160938	89207366	+
Ccdc42	86.1489	chr11	68400538	68411453	+
4930564B18Rik	86.1055	chr14	76042065	76066944	+
Dmwd	86.0291	chr7	19661548	19668124	+
Igsf11	86.0155	chr16	38902457	39027270	+
2610021K21Rik	85.9654	chr12	100955740	101121652	-
Haus1	85.9613	chr18	77996305	78006519	-
1700125D06Rik	85.8473	chr4	129168433	129169200	+
Isca1	85.6334	chr13	59856775	59871150	-
Sav1	85.6143	chr12	71065998	71087989	-
Ppp3r2	85.6093	chr4	49691618	49694855	-
Cox5b	85.5636	chr1	36748331	36750233	+
Atp6v0e	85.4813	chr17	26813340	26836591	+
Snrpd2	85.4707	chr7	19735186	19738075	+
1110001J03Rik	85.4079	chr6	38484860	38489449	+
1700011H14Rik	85.4076	chr14	49846033	49865103	-
Zswim2	85.3971	chr2	83755235	83781383	-
2810453I06Rik	85.3723	chr5	144309573	144325393	+
1700054N08Rik	85.2446	chr8	126364743	126384109	-
Phc1	85.1826	chr6	122267748	122287033	-
Fnbp4	85.1757	chr2	90585526	90621177	+
Ankhd1	85.1575	chr18	36720256	36818562	+
Gm15800	85.1026	chr5	121670227	121818586	+
Arhgap29	85.0961	chr3	121656243	121719071	+
Msrb2	85.0636	chr2	19293262	19316597	+
Otub1	85.0606	chr19	7272695	7280774	-
4921517D21Rik	85.0382	chr9	107830799	107834792	+
Cul4a	85.0033	chr8	13105720	13147939	+
Efcab2	84.9451	chr1	180336011	180413380	+
Spo11	84.9333	chr2	172805342	172819077	+
Rspry1	84.9262	chr8	97125840	97184176	+
Dnajc27	84.8958	chr12	4082573	4110612	+
Slc36a3	84.8759	chr11	54938324	54965208	-
Tbc1d20	84.7898	chr2	152119607	152138326	+
Paqr5	84.7494	chr9	61801544	61874597	-
Hnf1b	84.6974	chr11	83664370	83719317	+
Znrf2	84.6397	chr6	54766909	54840218	+
4933406M09Rik	84.6202	chr1	136282516	136287560	+
Srsf3	84.6047	chr17	29169604	29180317	+
Xrcc4	84.4229	chr13	89988518	90229213	-
Dnajc11	84.4049	chr4	151307828	151356068	+
Wfdc3	84.3703	chr2	164556725	164568767	-
Btg1	84.1422	chr10	96079634	96085445	+
Rnf125	84.1117	chr18	21103125	21142349	+
Eapp	83.9398	chr12	55774453	55796852	-
4921536K21Rik	83.7909	chr11	3786090	3795129	-
Slmap	83.7213	chr14	27232660	27353226	-
A2ld1	83.7081	chr14	123290081	123312387	-
Atg3	83.6659	chr16	45158941	45188651	+
Nmt2	83.6493	chr2	3201559	3243641	+
Mta2	83.6462	chr19	9016409	9026790	+
Xrcc2	83.5776	chr5	25195633	25211615	-
Klhdc10	83.4024	chr6	30351908	30405174	+
Atp5g3	83.3782	chr2	73746506	73749351	-
Naa30	83.3767	chr14	49791901	49810706	+
Rps23	83.2265	chr13	91062726	91064337	+
AK129341	83.1635	chr9	8076632	8134294	-
3830417A13Rik	83.1439	chrX	61426722	61431953	+
Usp5	83.129	chr6	124765036	124779465	-
6820408C15Rik	83.0972	chr2	152241322	152270064	+
Fam174a	83.0089	chr1	97210204	97231861	+
BC061237	82.996	chr14	45119792	45126016	+
Topors	82.9533	chr4	40206638	40216874	-
Psmd11	82.9233	chr11	80242116	80285635	+
Csrnp3	82.8833	chr2	65683823	65869603	+
Alyref	82.7484	chr11	120455829	120459679	-
Crcp	82.7184	chr5	130505175	130536653	+
[truncated: 6,060 more rows]

## Sheet: Table S6
Table S6. Genes enriched in the CB vs. round spermatids.
name	FPKM	FPKM	Fold enrichment
40060	4.37202e-05	1.54277e-05	2.83388
0610037L13Rik	0.000136696	5.5564e-05	2.46016
1110004E09Rik	0.000812972	0.000366293	2.21946
1300001I01Rik	3.23885e-05	1.22174e-05	2.65102
1300017J02Rik	3.24494e-05	1.30006e-05	2.496
1700001J11Rik	0.000761889	0.000101619	7.49752
1700003E16Rik	0.000267292	0.000116577	2.29283
1700003M02Rik	0.00136339	0.000545947	2.49729
1700008F21Rik	0.000564004	0.000230719	2.44454
1700010I14Rik	0.00111962	0.000350121	3.19781
1700011F14Rik	3.62195e-05	1.60139e-05	2.26175
1700013G24Rik	0.00083717	0.000393786	2.12595
1700016M24Rik	0.000553141	8.17262e-05	6.76822
1700017D01Rik	0.000350315	0.00012808	2.73513
1700019A02Rik	0.00055156	0.000249739	2.20854
1700025F22Rik	0.000362214	0.000129387	2.79946
1700028I16Rik	4.67296e-05	9.60878e-06	4.86322
1700028J19Rik	0.000273556	8.80879e-05	3.10549
1700039E15Rik	0.000319218	0.000145084	2.20023
1700086L19Rik	0.000596995	0.000278409	2.14431
1700123L14Rik	0.000599174	0.000118951	5.03715
1810009A15Rik	7.78378e-05	2.42334e-05	3.212
1810012P15Rik	9.00355e-05	9.14018e-06	9.85051
1810030N24Rik	0.000306858	8.45327e-05	3.63005
1810055G02Rik	6.35444e-05	2.38525e-05	2.66406
2210404O07Rik	0.00148329	0.000712508	2.08179
2310028H24Rik	7.88856e-05	2.72131e-05	2.89881
2310061I04Rik	0.000320701	0.000118169	2.71391
2410003K15Rik	5.93256e-05	9.78152e-06	6.06507
2610027L16Rik	8.28888e-05	3.66102e-05	2.26409
2610507B11Rik	0.000375309	7.73055e-05	4.85488
2700049A03Rik	0.000200534	7.28528e-05	2.75259
2700060E02Rik	0.000200013	7.64768e-05	2.61535
2810422J05Rik	4.72989e-05	1.01168e-05	4.67531
2900011O08Rik	0.000204732	6.52456e-05	3.13786
4732415M23Rik	0.00506993	0.00146097	3.47024
4921528I01Rik	0.000153958	5.66235e-05	2.71898
4922502D21Rik	0.00131978	0.000179935	7.33476
4930443G12Rik	5.66369e-05	1.70241e-05	3.32687
4930453N24Rik	0.000689773	0.000172617	3.99597
4930455F23Rik	0.000557667	0.000152257	3.66267
4930473A06Rik	0.000222528	5.9758e-05	3.72382
4930504O13Rik	0.000142589	9.25549e-06	15.4059
4930511M11Rik	0.000303424	8.60961e-05	3.52425
4930544G11Rik	0.000613142	6.49279e-05	9.44342
4930579G22Rik	0.000210217	0.000101199	2.07725
4931429I11Rik	0.000146904	3.82048e-05	3.84518
4933405L10Rik	4.52665e-05	1.00407e-05	4.50829
4933409G03Rik	0.00110598	0.000289382	3.82188
4933415F23Rik	0.000406002	9.45479e-05	4.29415
4933434I20Rik	8.27607e-05	3.65539e-05	2.26407
Aak1	3.39674e-05	1.37562e-05	2.46924
Abca16	5.38759e-05	1.77406e-05	3.03687
Abca17	6.41767e-05	1.35771e-05	4.72684
Abcf1	0.000722269	0.000221401	3.26227
Abhd16a	0.000232468	4.28295e-05	5.42775
Acat2	7.82597e-05	2.02257e-05	3.86932
Acr	0.000641367	0.000304349	2.10734
Actg1	0.000735397	0.000258626	2.84348
Actr1a	0.000284411	0.000109829	2.58957
Adad1	0.000875705	0.000403552	2.16999
Adam18	0.000172712	6.16697e-05	2.80059
Adam1b	0.000242875	9.14279e-05	2.65646
Adam2	0.000318687	0.000117631	2.70921
Adam3	0.00429699	0.000590127	7.28148
Adam30	0.000147821	6.40543e-05	2.30774
Adam32	0.00200875	0.00033703	5.96016
Adam5	0.00164021	0.000198679	8.25558
Ahcyl1	6.79595e-05	3.20583e-05	2.11987
Ahdc1	9.33611e-05	3.66116e-05	2.55004
AI429214	7.87692e-05	3.93233e-05	2.00311
Ak7	8.12022e-05	2.9439e-05	2.75832
Akap12	0.00166052	0.000798316	2.08003
Akap14	5.50266e-05	2.6291e-05	2.09298
Akt3	0.000122594	5.36461e-05	2.28524
Aldh1a2	8.41713e-05	3.36829e-05	2.49893
Aldh9a1	4.34173e-05	1.99169e-05	2.17992
Ankar	7.1634e-05	2.69519e-05	2.65785
Ankrd13a	0.000279424	0.000118515	2.35772
Ankrd36	0.000610279	0.000276072	2.21058
Ano10	4.11387e-05	2.03907e-05	2.01752
Ap1m1	0.000300228	0.000107154	2.80183
Ap2b1	0.000727874	0.000240799	3.02274
Ap2s1	0.000176669	8.29508e-05	2.1298
Ap3b1	0.000126627	2.19313e-05	5.77381
Ap3m1	3.40814e-05	1.62358e-05	2.09914
Aqp11	0.000610081	0.000138725	4.39779
Aqr	6.5847e-05	3.08077e-05	2.13735
Arc	0.000113476	3.84951e-05	2.9478
Arglu1	8.62677e-05	1.62572e-05	5.30642
Arhgap29	0.000342549	0.000123827	2.76636
Arhgap5	8.41174e-05	3.84338e-05	2.18863
Arid3b	0.000154194	1.99211e-05	7.74023
Arl3	0.000491148	0.000161349	3.04402
Arl8b	0.000115461	5.38407e-05	2.1445
Arsa	0.000121081	1.86339e-05	6.49791
Art3	0.00171063	0.000664558	2.57408
Asap1	0.00121293	0.000328087	3.69698
Asb4	5.47071e-05	1.94924e-05	2.80658
Ascc2	7.30273e-05	1.22155e-05	5.97826
Asnsd1	0.000389511	6.73455e-05	5.78377
Asxl1	0.000172321	3.67182e-05	4.69306
Atf1	0.000555252	0.000274272	2.02446
Atg9a	0.000112025	1.86182e-05	6.01697
Atmin	3.40308e-05	1.21861e-05	2.79259
Atoh8	4.72722e-05	1.67882e-05	2.8158
Atp5h	0.000837077	0.000282871	2.95921
Atp5j2	5.09324e-05	1.04512e-05	4.87335
Atp5o	0.0003882	0.000167742	2.31426
Atp6v1c1	5.85392e-05	2.877e-05	2.03473
Atp8b3	0.00135899	0.000268746	5.05679
Atpif1	0.00149554	0.00059993	2.49285
Atxn1l	6.14579e-05	2.79321e-05	2.20026
Aup1	5.98612e-05	7.91201e-06	7.56587
Bag5	0.00170952	0.000691848	2.47095
Bbs9	0.000255774	9.55699e-05	2.6763
BC046331	0.000155688	6.18353e-05	2.51778
Bcl7c	0.000120316	2.76466e-05	4.35192
Bms1	0.000140942	3.92557e-05	3.59037
Brap	0.000335726	8.81336e-05	3.80928
Brd7	8.78064e-05	3.91759e-05	2.24134
Bsg	0.000390215	0.000184541	2.11452
Bspry	0.000261692	7.22375e-05	3.62266
Btbd1	0.000251601	5.44171e-05	4.62356
Btbd16	0.000166714	6.57172e-05	2.53683
Bub1b	4.5448e-05	2.08173e-05	2.18318
C3	8.25827e-05	2.28115e-05	3.62023
C330019G07Rik	0.000109008	2.6368e-05	4.1341
C330027C09Rik	7.63923e-05	1.94526e-05	3.92711
[truncated: 785 more rows]
